# Supplementary material for: Light-mediated sulfonyl-iodination of ynamides and internal alkynes
Source: Royal Society of Chemistry journal article supplement (doi:10.1039/d3cc00842h), 2023-01-01

# Supporting Information

For

## Light-Mediated Sulfonyl-Iodination of Ynamides and Internal Alkynes

Mohana Reddy Mutra,<sup>a</sup> Jing Li<sup>a</sup> and Jeh-Jeng Wang<sup>\*a,b</sup>

<sup>a</sup>Department of Medicinal and Applied Chemistry, Kaohsiung Medical University, No. 100, Shiquan 1st Rd, Sanmin District, Kaohsiung City, 807, Taiwan.

<sup>b</sup>Department of Medical Research, Kaohsiung Medical University Hospital, No. 100 Tzyou 1st Rd, Sanmin District, Kaohsiung City 807, Taiwan.

E-mail: [jjwang@kmu.edu.tw](mailto:jjwang@kmu.edu.tw)

## Table of Contents

|                                                                                                             |          |
|-------------------------------------------------------------------------------------------------------------|----------|
| 1. <b>General Information</b>                                                                               | S3       |
| 2. <b>Reaction handling setup pictures and blue LED technical details</b>                                   | S4-S5    |
| 3. <b>Preparation of Starting Materials</b>                                                                 | S6-S9    |
| 4. <b>Experimental Procedures</b>                                                                           | S9-S13   |
| 5. <b>Mechanistic studies</b>                                                                               | S14-S17  |
| 6. <b>Characterization data</b>                                                                             | S18-S25  |
| 7. <b>References</b>                                                                                        | S26      |
| 8. <b>Copies of <math>^1\text{H}</math>, <math>^{13}\text{C}</math> and 2D NMR spectra of the compounds</b> | S27-S94  |
| 9. <b>Check CIF Files</b>                                                                                   | S95-S110 |

## 1. General Information

$^1\text{H}$  and  $^{13}\text{C}$  NMR spectra were recorded on a 400 MHz Varian Unity Plus or Varian Mercury plus spectrometer. The chemical shift ( $\delta$ ) values are reported in parts per million (ppm), and the coupling constants ( $J$ ) are given in Hz. The spectra were recorded using  $\text{CDCl}_3$  as a solvent.  $^1\text{H}$  NMR chemical shifts are referenced to tetramethylsilane (TMS) (0 ppm).  $^{13}\text{C}$  NMR was referenced to  $\text{CDCl}_3$  (77.0 ppm). The abbreviations used are as follows: s, singlet; d, doublet; t, triplet; q, quartet; dd, doublet of doublet; ddd, doublet of doublet of doublet; dt, doublet of triplets; td, triplet of doublet; m, multiplet. Mass spectra and high-resolution mass spectra (HRMS) was measured using the LTQ Orbitrap XL (Thermo Fischer Scientific) Liquid chromatography–mass spectrometry at National Taiwan Normal University. Melting points were determined on an EZ-Melt (Automated melting point apparatus). All the synthesized products showed  $^1\text{H}$  NMR spectra in agreement with the assigned structures. Reaction progress and products were routinely monitored by TLC using Merck TLC aluminum sheets (silica gel 60 F254). Column chromatography was carried out with 230-400 mesh silica gel 60 (Merck) using a mixture of hexane/ethyl acetate as the eluent. Importantly, the reaction temperature may differ based on place and weather condition outside environment.

### 1.1. Light Sources

Reactions were carried out using 40 W blue LED lamp (Kessil A160WE Controllable LED Aquarium Light) purchased from Kessil via Amazon (Taiwan). See the following links for more details. [https://www.kessil.com/aquarium/saltwater\\_A160.php](https://www.kessil.com/aquarium/saltwater_A160.php)[https://www.kessil.com/support/downloadfiles/aquarium/A160WE\\_UserManual.pdf](https://www.kessil.com/support/downloadfiles/aquarium/A160WE_UserManual.pdf)

40 W blue LED lamp (PR160L-456 nm) purchased from Fiberoptics & DiCon Lighting, Kaohsiung, Taiwan. See the following links for more details.

<https://kessil.com/science/PR160L.php>

### 1.2. Blue LED Emission Spectra

Emission spectra were measured using Ocean Optics USB 2000+ Spectrometer. Spectra were normalized to 1.0 at the emission maximum. These emission spectra were provided by Miss Angela Liou, Sales Specialist, DiCon Fiberoptics & DiCon Lighting, aliou@diconfiberoptics.com, Kaohsiung, Taiwan, +886 7 815-8055 Ext 485, DiCon Brands - Kessil | Fiilex | Cielux.

## 2. Reaction handling setup pictures and blue LED technical details<sup>1</sup>

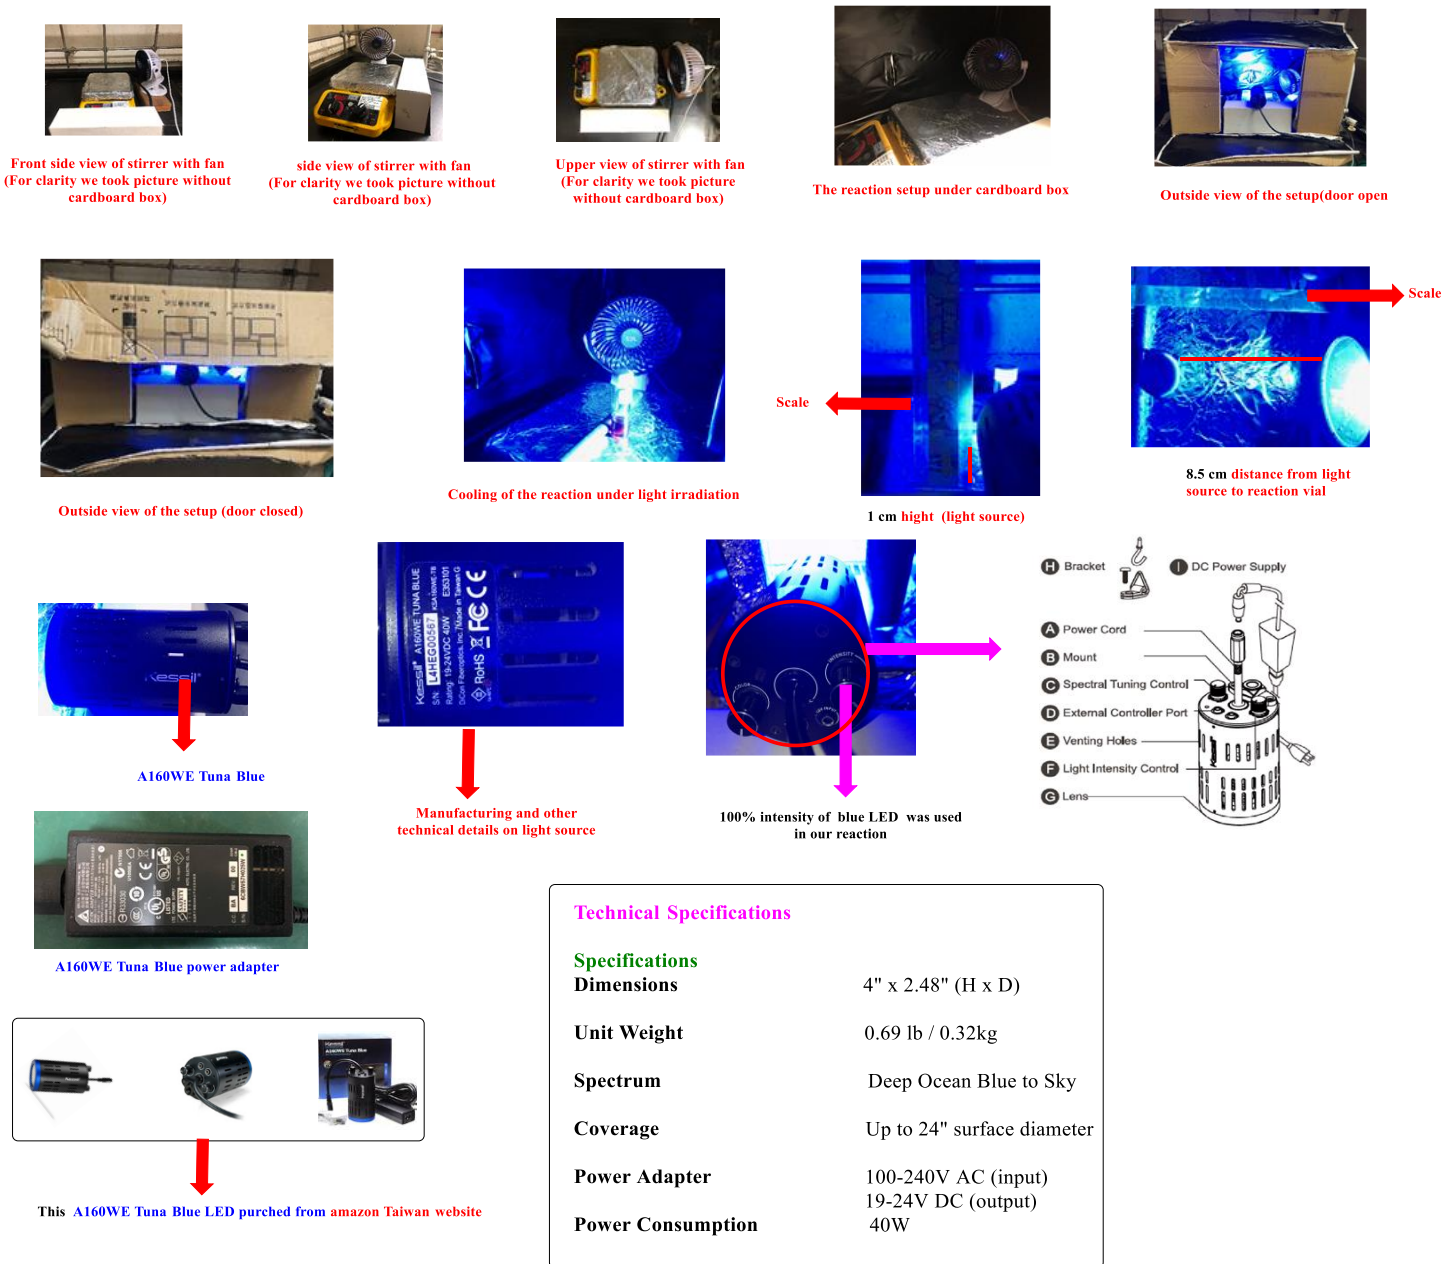

[https://www.kessil.com/aquarium/saltwater\\_A160.php](https://www.kessil.com/aquarium/saltwater_A160.php)

[https://www.kessil.com/support/downloadfiles/aquarium/A160WE\\_UserManual.pdf](https://www.kessil.com/support/downloadfiles/aquarium/A160WE_UserManual.pdf)

**Figure S1.** Pictures represent the complete reaction setup and other technical details of the 40 W Blue LED (Kessil A160WE Controllable LED Aquarium Light).

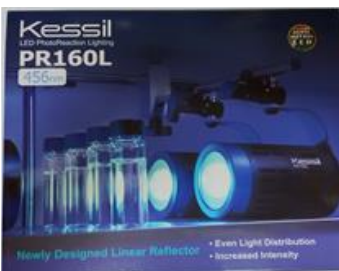

Outside box appearance of Kessil 40 W PR160L-456 nm blue LED light

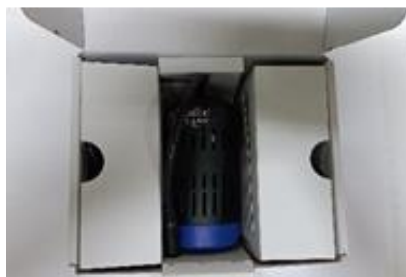

Kessil PR160L-456 nm blue LED light and supporting power cables inside the box

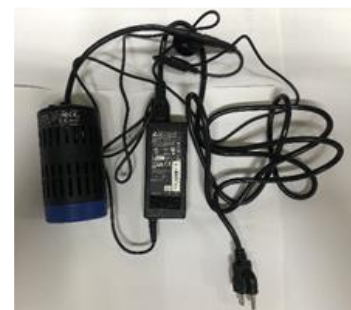

Kessil PR160L-456 nm blue LED light and supporting power cables outside the box

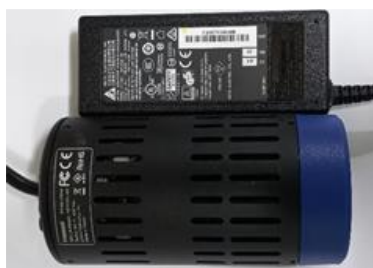

40 W blue LED light and adapter

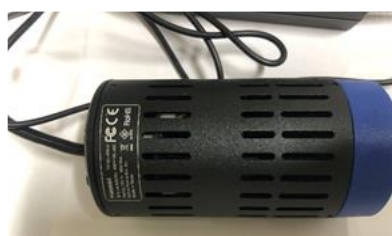

40 W blue LED light

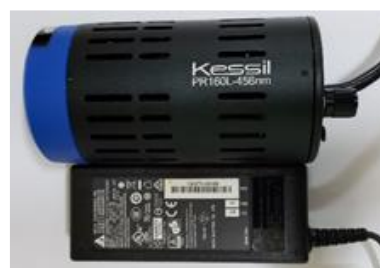

Kessil PR160L-450 nm

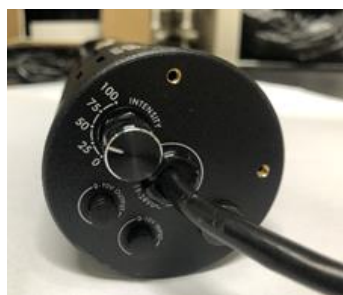

Blue LED intensity adjustment

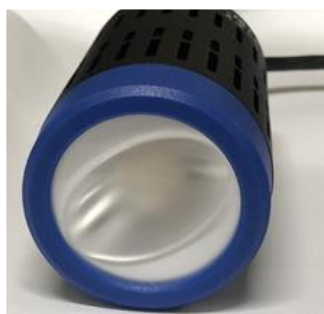

Frontside view of Blue LED light

#### Technical Specifications

|                                   |                                                       |
|-----------------------------------|-------------------------------------------------------|
| Power Consumption                 | = 456 nm (max 40W)                                    |
| Input Voltage                     | = 100-240 VAC                                         |
| Operating Temperature             | = 0 - 40 °C / 32 - 104 °F                             |
| Beam Angle                        | = 56°                                                 |
| Average Intensity of PR160 series | = 352mW/cm <sup>2</sup> (measured from 1 cm distance) |
| Dimensions                        | = 4.49" x 2.48" / 11.4cm x 6.3cm (H x D)              |

Figure S2. Pictures represents the 40 W blue LED lamp (PR160L-456 nm) and other technical details.

### 3. Preparation of Starting Materials

#### 3.1. Procedure for the synthesis of (Bromoethynyl)benzene<sup>1</sup>

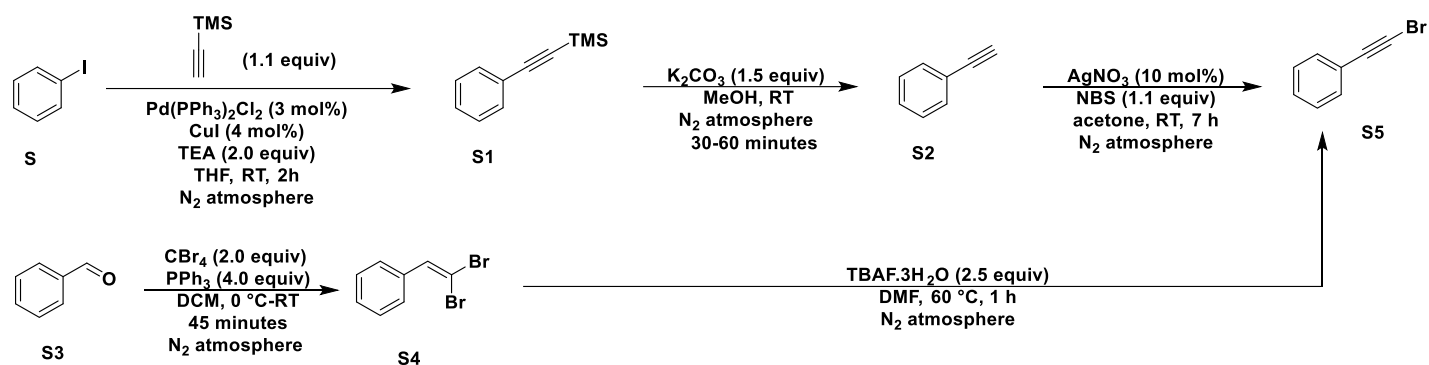

##### 3.1.1. Procedure for the synthesis of trimethyl(phenylethynyl)silane (S1):

To a dried schlenk flask equipped with a stir bar was charged with iodobenzene (6 g, 29.41 mmol, 1.0 equiv), trimethylsilylacetylene (3.17 g, 32.35 mmol, 1.1 equiv) in THF at room temperature. Next, the schlenk tube was evacuated and filled with nitrogen (three cycles), followed by freshly distilled Et<sub>3</sub>N (5.95 g, 58.82 mmol, 2.0 equiv), Pd(PPh<sub>3</sub>)<sub>2</sub>Cl<sub>2</sub> (0.61 g, 8.82 mmol, 3 mol%), CuI (0.22 g, 1.17 mmol, 4 mol%) were added under the N<sub>2</sub> atmosphere. The resulting mixture was stirred at room temperature for 2 h. After the completion of the reaction by TLC, the reaction mixture was diluted with water, and extracted with ethyl acetate. The combined organic layer was dried over Na<sub>2</sub>SO<sub>4</sub>, filtered, and concentrated to give the crude material. The crude material was purified by column chromatography using hexane (100%) as the eluent gave brown liquid trimethyl(phenylethynyl)silane in 88% (4.5 g).

##### 3.1.2. Procedure for the synthesis of ethynylbenzene (S2)

To a dried schlenk flask equipped with a stir bar was charged with trimethyl(phenylethynyl)silane (4.5 g, 25.86 mmol, 1.0 equiv) in MeOH at room temperature. Next, the schlenk flask was evacuated and filled with nitrogen (three cycles), followed by K<sub>2</sub>CO<sub>3</sub> (5.36 g, 38.79 mmol, 1.5 equiv) was added under the N<sub>2</sub> atmosphere. The resulting mixture was stirred at room temperature for 30-60 minutes. The solvent was removed under reduced pressure and the resulting solid/liquid was dissolved in ethyl acetate, washed with water and brine, and dried over Na<sub>2</sub>SO<sub>4</sub>. The crude material was purified by column chromatography using hexane-ethyl acetate (99:1%) as the eluent gave colorless liquid ethynylbenzene in 94% (2.5 g).

### 3.1.3. Procedure for the synthesis of (bromoethynyl)benzene (S5)

To a dried schlenk flask equipped with a stir bar was charged with ethynylbenzene (2.5 g, 24.47 mmol, 1.0 equiv) in dry acetone. Next, the schlenk flask was evacuated and filled with nitrogen (three cycles), followed by AgNO<sub>3</sub> (0.41 g, 2.44 mmol, 0.1 equiv), NBS (4.79 g, 26.92 mmol, 1.1 equiv) added in portions under the N<sub>2</sub> atmosphere. The mixture was stirred for 7 h at room temperature (the flask was covered with aluminium foil). After the completion of the reaction by TLC, the solvent was concentrated in vacuum. The reaction mixture was diluted with water, and extracted with ethyl acetate. The combined organic layer was dried over Na<sub>2</sub>SO<sub>4</sub>, filtered, and concentrated to give the crude material. The crude material was purified by column chromatography using hexane (100%) as the eluent gave yellow color liquid (bromoethynyl)benzene in 70% (3.1 g).

### 3.2. Alternative route for the synthesis of compound S5

**3.2.1. Procedure for Synthesis of (2,2-dibromovinyl)benzene (S4):** CBr<sub>4</sub> (1873 mg, 5.64 mmol, 2.0 equiv) and PPh<sub>3</sub> (2958 mg, 11.28 mmol, 4.0 equiv) were combined in a flask which was evacuated and refilled with nitrogen (three cycles). CH<sub>2</sub>Cl<sub>2</sub> (0.2 M) was added and the resulting solution was stirred for 10 minutes at room temperature. 1.0 equiv. of Benzaldehyde (0.3 g, 2.82 mmol) in CH<sub>2</sub>Cl<sub>2</sub> (2 mL) was added to the above reaction mixture at 0 °C and stirred for 45 minutes, slowly the reaction mixture warming to room temperature. The solvent was removed under reduced pressure and the residue was dissolved in the minimum quantity of CH<sub>2</sub>Cl<sub>2</sub>. Hexane was added to the flask and quickly filtered through a pad of silica. This was repeated until all the contents had been transferred to the filter bed. The filter cake was washed with a hexane:Et<sub>2</sub>O mixture (95:5, 200 mL), and the solvent was removed to give the as a yellow oil which was used for the next step.

### 3.2.2. Procedure for synthesis of (bromoethynyl)benzene (S5)

(2,2-dibromovinyl)benzene (500 mg, 1.90 mmol, 1.0 equiv) was dissolved in 5.0 mL of dry DMF. Next, the schlenk tube was evacuated and filled with nitrogen (three cycles) and TBAF·3H<sub>2</sub>O (1.2 g, 3.80 mmol, TBAF·3H<sub>2</sub>O (1505 mg, 4.77 mmol, 2.5 equiv) was added to the solution and the seal tube was evacuated and filled with nitrogen (three cycles). The reaction mixture was heated at 60 °C for 1 h (TLC). The reaction mixture was cooled to room temperature and diluted with diethyl ether (50 mL). The organic phase was washed with water and brine, dried over anhydrous MgSO<sub>4</sub>, filtered, and concentrated under reduced pressure. The crude product was purified by using silica gel column chromatography using n-hexane as eluent gave the desired yellow liquid in 72% (250 mg).

(Note: Other (bromoethynyl)benzene derivatives were obtained in a similar protocol based on availability of the starting material)

### 3.3. Procedure for the synthesis of 4-methyl-*N*-phenyl-*N*-(phenylethynyl)benzenesulfonamide (**1a**)<sup>2</sup>

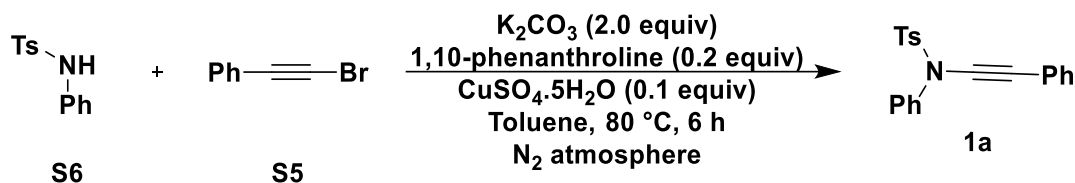

To a mixture of 4-methyl-*N*-phenylbenzenesulfonamide (250 mg, 1.0 mmol, 1.0 equiv), CuSO<sub>4</sub>·5H<sub>2</sub>O (25 mg, 0.10 mmol, 0.1 equiv), 1,10-phenanthroline (36 mg, 0.20 mmol, 0.2 equiv) and K<sub>2</sub>CO<sub>3</sub> (279 mg, 2.02 mmol, 2.0 equiv), dry toluene (4 mL). Next, the seal tube was evacuated and filled with nitrogen (three cycles), followed by (bromoethynyl)benzene (366 mg, 2.02 mmol, 2.0 equiv) were added. The vessel was stoppered under a nitrogen atmosphere and heated in an oil bath maintained at 80 °C for 6 h. The mixture was passed through celite and concentrated in a vacuum. The crude product was purified by using silica gel column chromatography using hexane/ethyl acetate (95:5) as eluent. This gave the desired 4-methyl-*N*-phenyl-*N*-(phenylethynyl)benzenesulfonamide as yellow gummy compound in 57% (200 mg).

(Note: Other ynamide derivatives (**1b-1l**) were obtained through the procedure reported above. Compounds known in the literature were confirmed by comparing their <sup>1</sup>H and <sup>13</sup>C NMR spectra)<sup>2</sup>

(Note: The unsymmetrical alkynes derivatives (**4**<sup>3</sup>, **5**<sup>4</sup>, **6**<sup>5</sup>, **7**<sup>6</sup>, **8**<sup>7</sup>, **9**<sup>1</sup>, **10**<sup>8</sup>, **11**<sup>9</sup>, **12**<sup>10</sup>, **13**<sup>10</sup>, **14**<sup>11</sup>, **15**<sup>12</sup>, **16**<sup>10</sup> and **17**<sup>10</sup>) were obtained through the procedure reported in the literature. Compounds known in the literature were confirmed by comparing their <sup>1</sup>H and <sup>13</sup>C NMR spectra)

### 3.4. Synthesis of 4-methylbenzenesulfonyliodide (**2a**)<sup>1,13</sup>

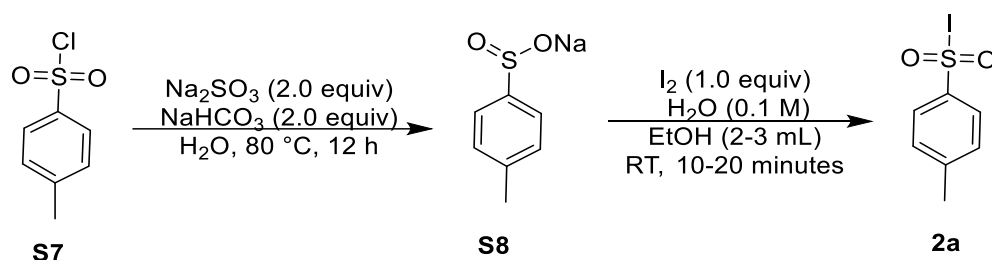

#### 3.4.1. Procedure for the preparation of sodium *p*-toluenesulfinate (**S26**)

To a round-bottom flask was added 4-toluenesulfonyl chloride (2.0 g, 10.49 mmol, 1.0 equiv), was added to a stirred solution of sodium sulfite (2.64 g, 20.98 mmol, 2.0 equiv), and sodium bicarbonate (1.76 g, 20.98 mmol, 2.0 equiv) in H<sub>2</sub>O. After being stirred at 80 °C for 12 h, then water was removed by a rotary evaporator. Then the remaining solid was extracted and recrystallized from ethanol to get the desired sodium *p*-toluenesulfinate (1.2 g, 64%) (Note: Other sodium sulfinates were obtained in a similar protocol).



### 3.4.2. Procedure for the preparation of 4-methylbenzenesulfonyliodide (2a)

To a round-bottom flask (50 mL) was added sodium *p*-toluenesulfinate (100 mg, 0.56 mmol, 1.0 equiv) in distilled water at room temperature. A saturated solution of iodine (142 mg, 0.56 mmol, 1.0 equiv) in ethanol (1-2 mL) was prepared and added gradually to the sodium *p*-tolylsulfinate solution. During this addition period, yellow precipitates were formed gradually. The precipitates were filtered, washed with cold water, and dried carefully at room temperature to give *p*-toluenesulfonyl iodide as a yellow solid. The synthesized 4-methylbenzenesulfonyl iodide immediately used for next step because of spontaneous decomposition of sulfonyl iodides.

Note: Other sulfonyl iodides were obtained in a similar protocol.

## 4. Experimental procedures

### 4.1. General procedure (A) for the Synthesis of (*E*)-*N*-(2-iodo-2-phenyl-1-tosylvinyl)-4-methyl-*N*-phenylbenzenesulfonamide derivatives

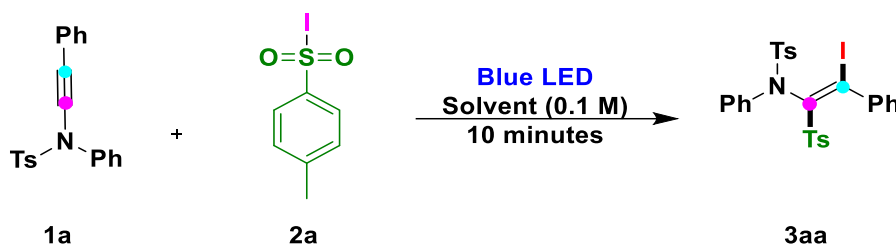

An oven-dried screw-capped, 8 mL vial equipped with a magnetic stir bar was charged with 4-methyl-*N*-phenyl-*N*-(phenylethynyl)benzenesulfonamide (55 mg, 0.15 mmol, 1.0 equiv), 4-methylbenzenesulfonyl iodide (54 mg, 0.19 mmol, 1.2 equiv), and dry acetonitrile (0.1 M) solvent was added. The resulting solution was stirred up to starting material completion (30 minutes) at 30 °C under a blue LED light (the reaction mixture vial was placed ~ 8.5 cm away from the LED light with a clip fan for cooling). After that, the crude reaction mixture was diluted with water and extracted with ethyl acetate. The organic layer was dried over Na<sub>2</sub>SO<sub>4</sub>, filtered, and concentrated. The crude material was purified by flash column chromatography using hexane-ethyl acetate (85:15) as the eluent gave the desired product (*E*)-*N*-(2-iodo-2-phenyl-1-tosylvinyl)-4-methyl-*N*-phenylbenzenesulfonamide as white solid in 66% (66 mg).

### 4.2. General procedure (B) for the Synthesis of (*E*)-4-iodo-4-phenyl-3-tosylbut-3-en-1-ol derivatives (12a)

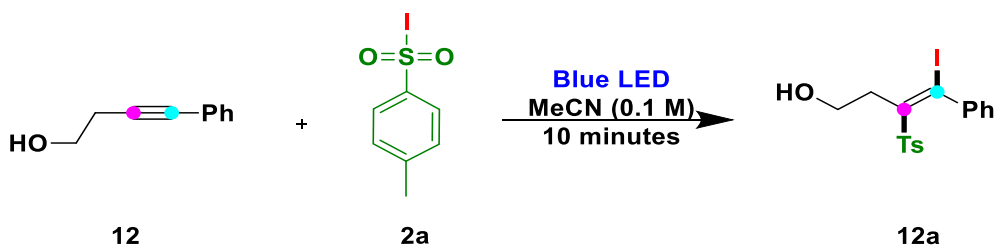

An oven-dried screw-capped, 8 mL vial equipped with a magnetic stir bar was charged with 4-phenylbut-3-yn-1-ol (45 mg, 0.30 mmol, 1.0 equiv), 4-methylbenzenesulfonyl iodide (104 mg, 0.36 mmol, 1.2 equiv), and MeCN (0.1 M) solvent was added. The resulting solution was stirred up to starting material completion (30 minutes) at 30 °C under a blue LED light (the reaction mixture vial was placed ~ 8.5 cm away from the LED light with a clip fan for cooling). After that, the crude reaction mixture was diluted with water and extracted with ethyl acetate. The organic layer was dried over Na<sub>2</sub>SO<sub>4</sub>, filtered, and concentrated. The crude material was purified by flash column chromatography using hexane-ethyl acetate (78:22) as the eluent gave the desired product (*E*)-4-iodo-4-phenyl-3-tosylbut-3-en-1-ol as white solid in 93% (60 mg).

#### 4.3. Gram-scale reaction and post-synthetic modifications (Table-S1).

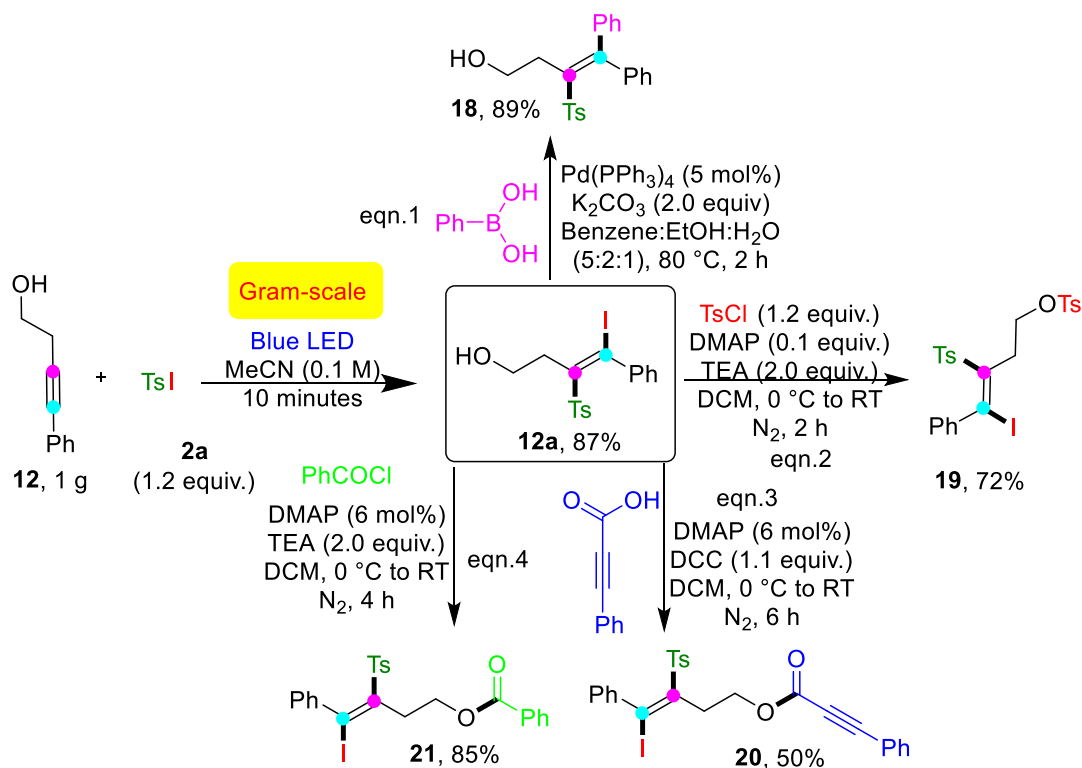

To demonstrate the advantage and practicability of our transformation, a gram-scale reaction was performed by combining internal alkyne **12** with **2a** (1.2 equiv.), which afforded an sulfonyl-iodine-tetrasubstituted olefin (**12a**) product in a gram quantity (2.55 g; 87% yield) and with excellent regioselectivity and stereoselectivity (**Table-S1**). Furthermore, the synthesized **12a** product was applied

to the post-functionalization reactions. First, the active C–I bond was used in the Suzuki reaction to insert a phenyl moiety, and the desired product was produced with an excellent yield (89%) (eqn. 1). There were numerous opportunities to synthetically modify the freely available alcohols into various functional groups. In this case, we used 4-toluenesulfonyl chloride, 3-phenylpropionic acid, and benzyl chloride under various reaction conditions (eqn. 2–4), which afforded the desired product **19–21** in good to excellent yields (50%–85%).

#### 4.4. Gram scale synthesis of (*E*)-4-iodo-4-phenyl-3-tosylbut-3-en-1-ol (**12a**)

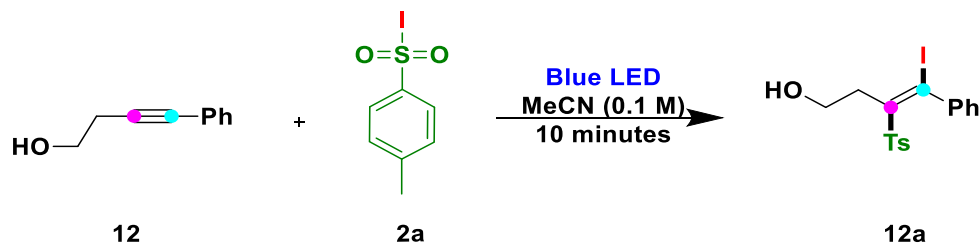

An oven-dried screw-capped, 8 mL vial equipped with a magnetic stir bar was charged with 4-phenylbut-3-yn-1-ol (1 g, 6.84 mmol, 1.0 equiv), 4-methylbenzenesulfonyl bromide (2.32 g, 8.21 mmol, 1.2 equiv), and DCM (0.1 M) solvent was added. The resulting solution was stirred up to starting material completion (30 minutes) at 30 °C under a blue LED light (the reaction mixture vial was placed ~ 8.5 cm away from the LED light with a clip fan for cooling). After that, the crude reaction mixture was diluted with water and extracted with ethyl acetate. The organic layer was dried over Na<sub>2</sub>SO<sub>4</sub>, filtered, and concentrated. The crude material was purified by flash column chromatography using hexane-ethyl acetate (75:25) as the eluent gave the desired product (*E*)-4-iodo-4-phenyl-3-tosylbut-3-en-1-ol as white solid in 87% (2550 mg).

#### 4.5. Procedure (C) for the synthesis of 4,4-diphenyl-3-tosylbut-3-en-1-ol (**18**)

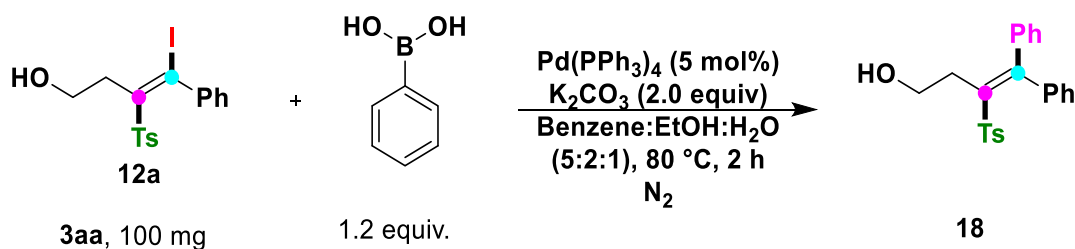

An overnight dried seal tube (15 mL) was charged with (*E*)-4-iodo-4-phenyl-3-tosylbut-3-en-1-ol (100 mg, 0.23 mmol, 1.0 equiv), phenylboronic acid (34 mg, 0.28 mmol, 1.3 equiv), Pd(PPh<sub>3</sub>)<sub>4</sub> (8 mg, 0.011 mmol, 5 mol%), K<sub>2</sub>CO<sub>3</sub> (64 mg, 0.46 mmol, 2.0 equiv) in Benzene:EtOH:H<sub>2</sub>O (5:2:1) (3 mL) under N<sub>2</sub> atmosphere. The resulting mixture was stirred at 80 °C for 2 h. After the completion of the reaction by TLC, the reaction mixture was cooled to room temperature, diluted with water, and extracted with ethyl acetate. The organic layer dried

over anhydrous Na<sub>2</sub>SO<sub>4</sub>, filtered, and concentrated to give the crude material. The crude material was purified by column chromatography using hexane-ethyl acetate (82:18) as the eluent to afford 4,4-diphenyl-3-tosylbut-3-en-1-ol in 89% (79 mg).

#### 4.6. Procedure (D) for the synthesis of (*E*)-4-iodo-4-phenyl-3-tosylbut-3-en-1-yl 4-methylbenzenesulfonate (19)

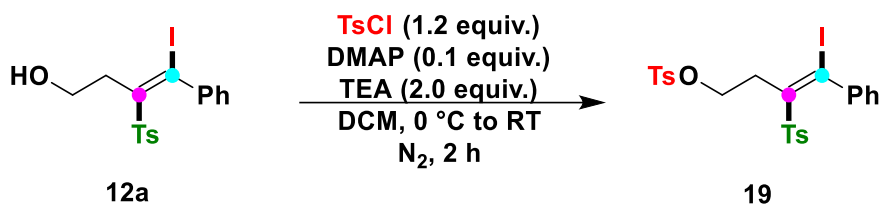

An overnight dried round bottom flask (20 mL) was charged with (*E*)-4-iodo-4-phenyl-3-tosylbut-3-en-1-ol (100 mg, 0.23 mmol, 1.0 equiv) in dichloromethane (10 mL) was cooled to 0 °C and then DMAP (3 mg, 0.02 mmol, 0.1 equiv), tosyl chloride (53 mg, 0.28 mmol, 1.2 equiv) and Et<sub>3</sub>N (47 mg, 0.46 mmol, 2.0 equiv) were added. The reaction mixture was stirred at room temperature for 2 h and then quenched with an aqueous NH<sub>4</sub>Cl solution, extracted with DCM, dried over anhydrous Na<sub>2</sub>SO<sub>4</sub>, concentrated and purified by column chromatography using hexane-ethyl acetate (80:20) to afford (*E*)-4-iodo-4-phenyl-3-tosylbut-3-en-1-yl 4-methylbenzenesulfonate in 72% (98 mg).

#### 4.7. Procedure (E) for the synthesis of (*E*)-4-iodo-4-phenyl-3-tosylbut-3-en-1-yl 3-phenylpropiolate (20)

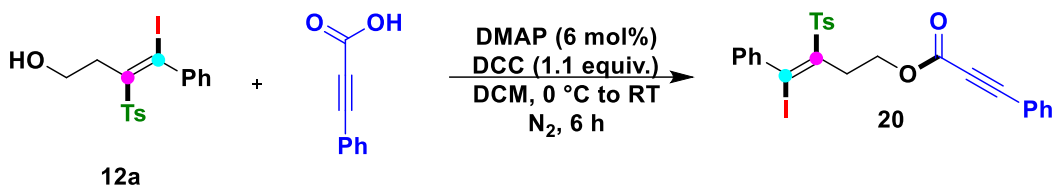

An overnight dried round bottom flask (20 mL) was charged with (*E*)-4-iodo-4-phenyl-3-tosylbut-3-en-1-ol (100 mg, 0.23 mmol, 1.0 equiv), 3-phenylpropiolic acid (34 mg, 0.23 mmol, 1.0 equiv) in dried CH<sub>2</sub>Cl<sub>2</sub> (5 mL) under a nitrogen atmosphere DMAP (2 mg, 0.01 mmol, 0.06 equiv) was added and cooled to 0 °C. To the resulting solution a solution of DCC (53 mg, 0.25 mmol, 1.1 equiv) in dried CH<sub>2</sub>Cl<sub>2</sub> (5 mL) was dropped in slowly under N<sub>2</sub> atmosphere. After this the mixture was allowed to come to room temperature and stirred for further 6 h. The resulting suspension was filtered over celite. The organic layer was washed thrice with 0.25 N aqueous HCl-, once with sat. aqueous NaHCO<sub>3</sub>-solution, dried over Na<sub>2</sub>SO<sub>4</sub> and concentrated under reduced pressure. The crude residue was purified by purified by column chromatography using hexane-ethyl acetate (90:90) as the eluent to afford (*E*)-4-iodo-4-phenyl-3-tosylbut-3-en-1-yl 3-phenylpropiolate in 50% (65 mg).

#### 4.8. Procedure (F) for the synthesis of (*E*)-4-iodo-4-phenyl-3-tosylbut-3-en-1-yl benzoate (21)

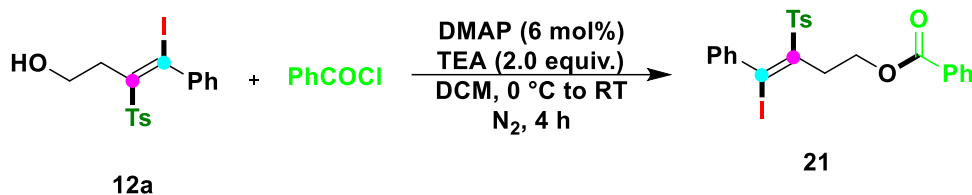

In overnight dried round bottom flask (20 mL) was charged with (*E*)-4-iodo-4-phenyl-3-tosylbut-3-en-1-ol (100 mg, 0.23 mmol, 1.0 equiv) in DCM (5 mL) was added triethylamine (47 mg, 0.46 mmol, 2.0 equiv), benzoyl chloride (40 mg, 0.28 mmol, 1.2 equiv), and DMAP (3 mg, 0.023 mmol, 0.1 equiv) at 0 °C under N<sub>2</sub> atmosphere. The reaction was stirred at room temperature and monitored by TLC to the consumption of starting material **12a**. The mixture was diluted with 1 M HCl solution and the aqueous phase was extracted with DCM. Combined organic phases were washed with brine, dried, and concentrated. The crude residue was purified by purified by column chromatography using hexane-ethyl acetate (89:11) as the eluent to afford (*E*)-4-iodo-4-phenyl-3-tosylbut-3-en-1-yl benzoate in 85% (106 mg).

## 5. Mechanistic studies

### 5.1. Radical scavenger experiments and UV-vis absorption spectra of **1a**, **2a** and blue LED emission

#### a) Radical scavenger experiments

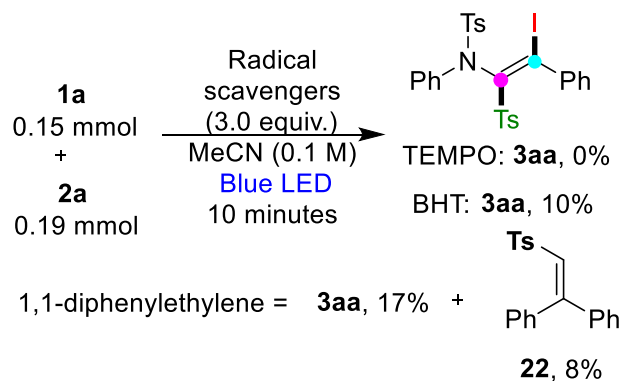

#### b) UV-vis absorption spectra of **1a**, **2a** (in 10<sup>-3</sup> M MeCN) and blue LED emission

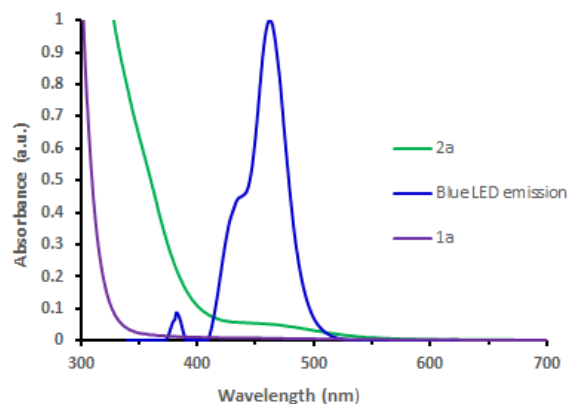

**Scheme S1.** Mechanistic studies: a) Radical scavenger experiments; b) UV-vis absorption spectra of **1a**, **2a** and blue LED emission

Radical scavenger experiments were conducted to gain insight into this transformation mechanism (Scheme S1, a). The reaction completely stopped the formation of the **3aa** product in (2,2,6,6-tetramethylpiperidin-1-yl)oxyl as a radical scavenger. However, a low yield of the **3aa** product was observed in the presence of butylated hydroxytoluene. In ethene-1,1-diyldibenzene as a radical scavenger, sulfonyl radical-trapping product **22** was observed in 8% yield along with compound **3aa** in 17% yield. The product was confirmed by <sup>1</sup>H and <sup>13</sup>C nuclear magnetic resonance (NMR). These reactions suggest that radical species participated in the reaction

pathway. To gain insight into the role of blue LED light in this experiment, we acquired absorption spectra for **1a** and **2a** (the absorption spectra were acquired in a  $10^{-2}$ – $10^{-5}$  M MeCN solvent) and blue LED emission spectra for the blue LED light lamps in our previous studies (Scheme S1, b). The experimental results revealed that blue light influences and accelerates the radical initiation process from **2a** via the absorbance of blue LED light from the source to the radical but not ynamides. Based on mechanistic studies and previous literature support on sulfonyl iodides with other counterparts under light, we excluded the EDA or an halogen-bonding complex in the reaction mechanism.

### 5.1. Blue LED emission spectra and absorption spectra of compounds (**2a**)<sup>1</sup>

Emission spectra were measured using Ocean Optics USB 2000+ Spectrometer. Spectra were normalized to 1.0 at the emission maximum. This emission spectra were provided by Miss Angela Liou, Sales Specialist, DiCon Fiberoptics & DiCon Lighting, [aliou@diconfiberoptics.com](mailto:aliou@diconfiberoptics.com), Kaohsiung, Taiwan, +886 7 815-8055 Ext 485, DiCon Brands - Kessil | Fiilex | Cielux.

#### 5.1.1. 40 W Kessil A160WE Tuna Blue LED emission spectra<sup>1</sup>

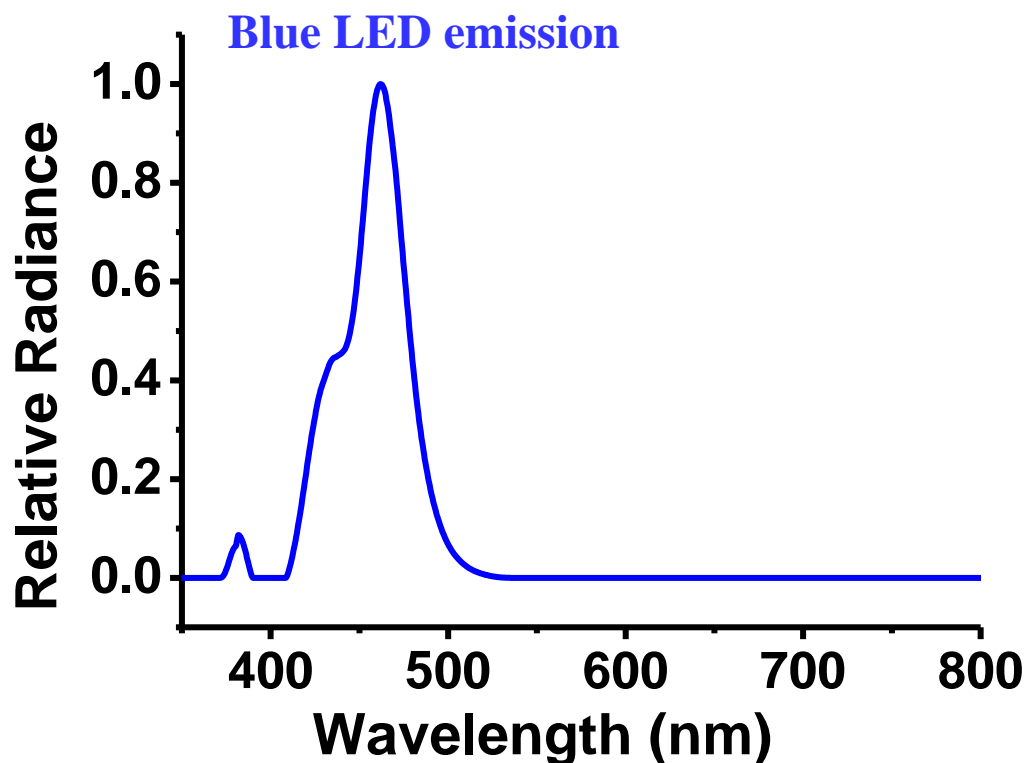

**Figure S3.** Emission spectrum from a 40 W Kessil A160WE Tuna Blue LED shown as blue color line with emission maximum at  $\lambda_{\text{max}} = 462$  nm flanked by a second peak at  $\lambda = 382$  nm.

### 5.1.2. 40 W Kessil PR160L-456 nm Blue LED emission spectra<sup>1</sup>

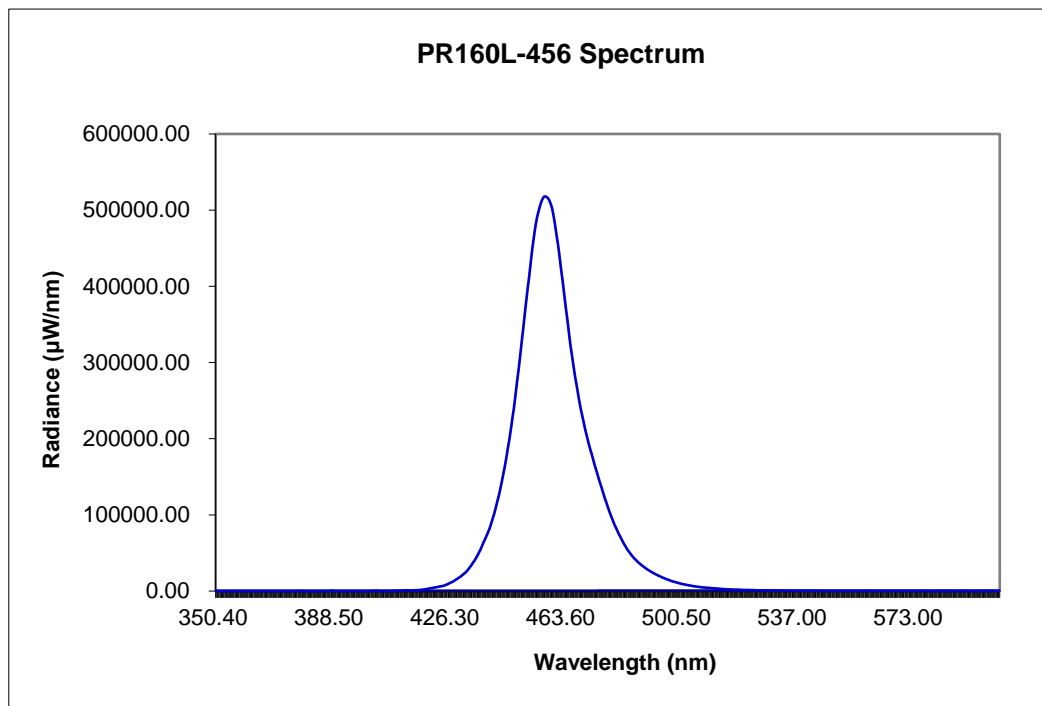

**Figure S4.** Emission spectrum from a 40 W Kessil PR160L-456 nm Blue LED shown as blue color line with emission maximum at  $\lambda_{\text{max}} = 456 \text{ nm}$

## 5.2. Absorption spectra<sup>1</sup>

### 5.2.1. Absorption spectra of 4-methylbenzenesulfonyl iodide (**2a**) in DCM solvent

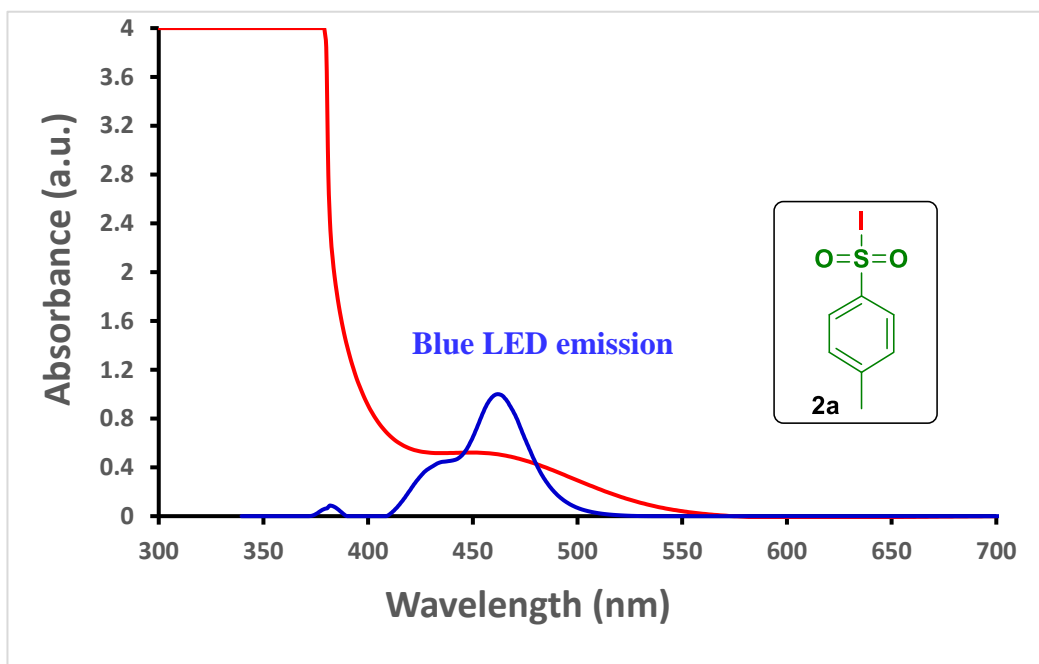

**Figure S5.** Absorption spectra of 4-methylbenzenesulfonyl iodide (**2a**) ( $10^{-2} \text{ M}$ ) in MeCN, and blue LED emission.

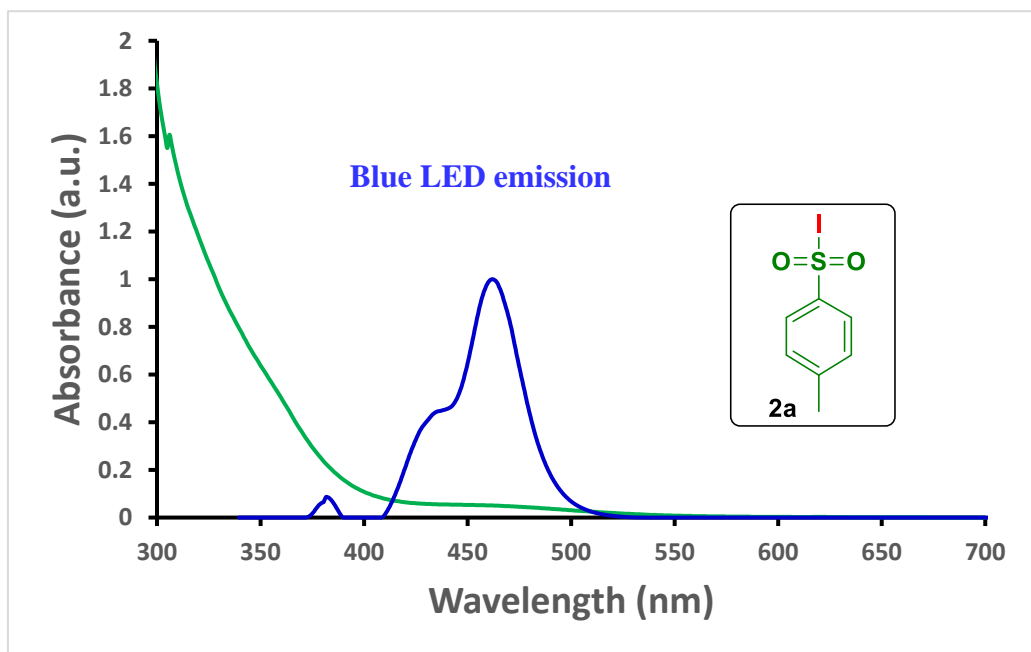

**Figure S6.** Absorption spectra of 4-methylbenzenesulfonyl iodide (**2a**) ( $10^{-3}$  M) in MeCN, and blue LED emission.

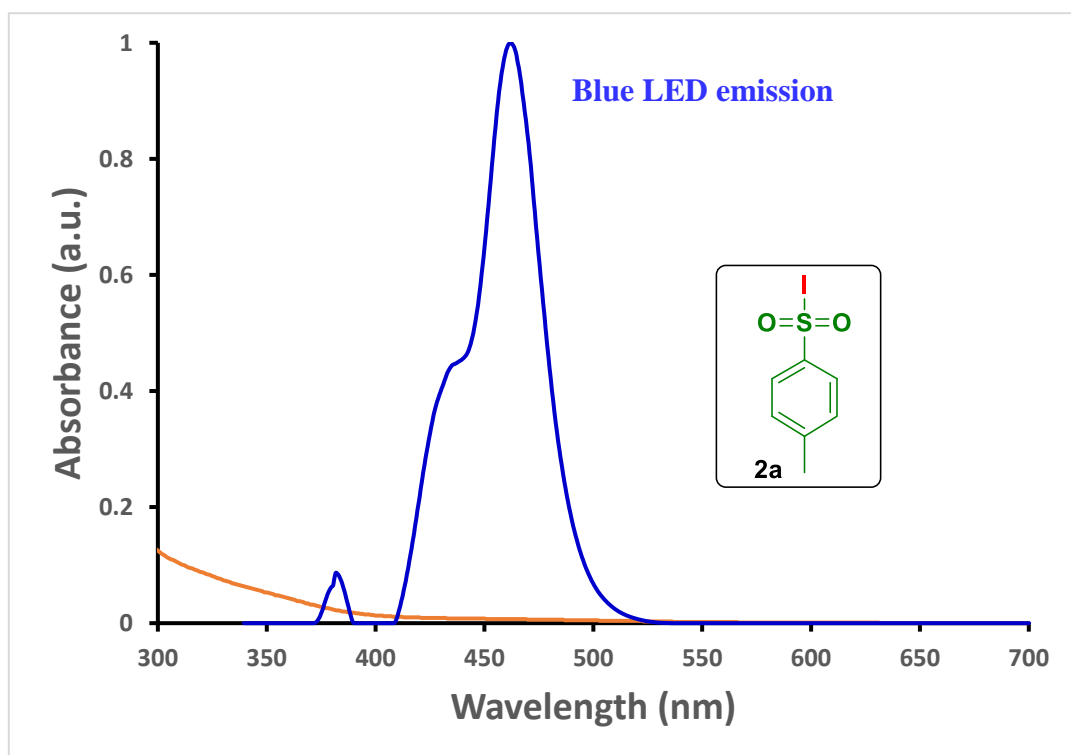

**Figure S7.** Absorption spectra of 4-methylbenzenesulfonyl iodide (**2a**) ( $10^{-4}$  M) in MeCN, and blue LED emission.



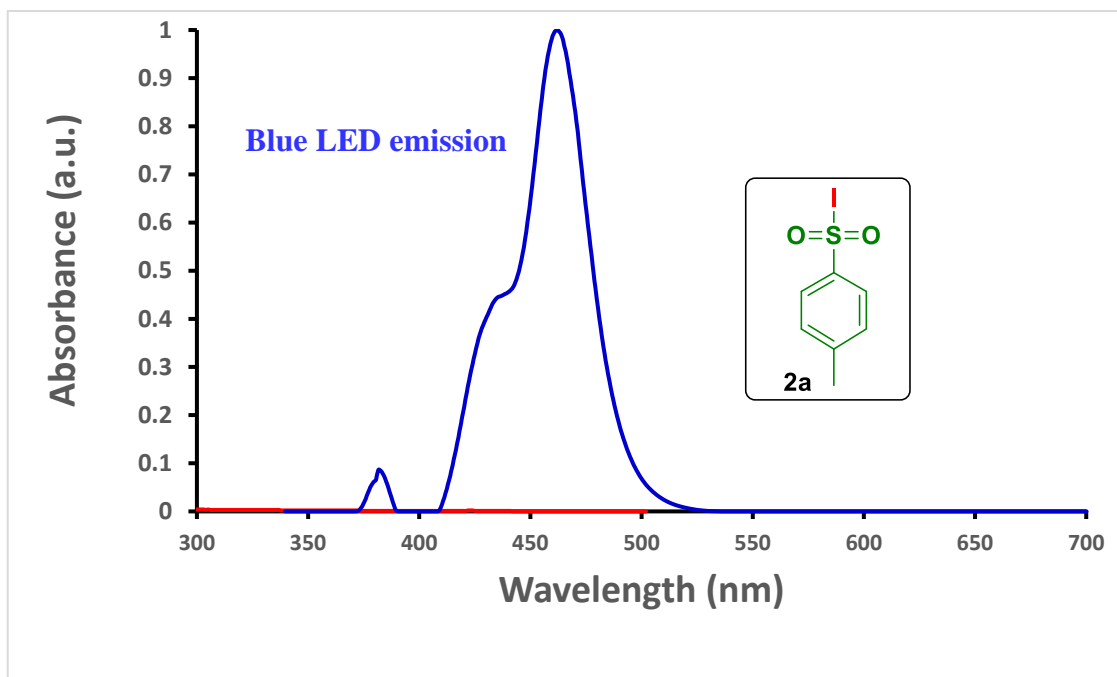

**Figure S9.** Absorption spectra of 4-methylbenzenesulfonyl iodide (**2a**) ( $10^{-5}$  M) in MeCN, and blue LED emission.

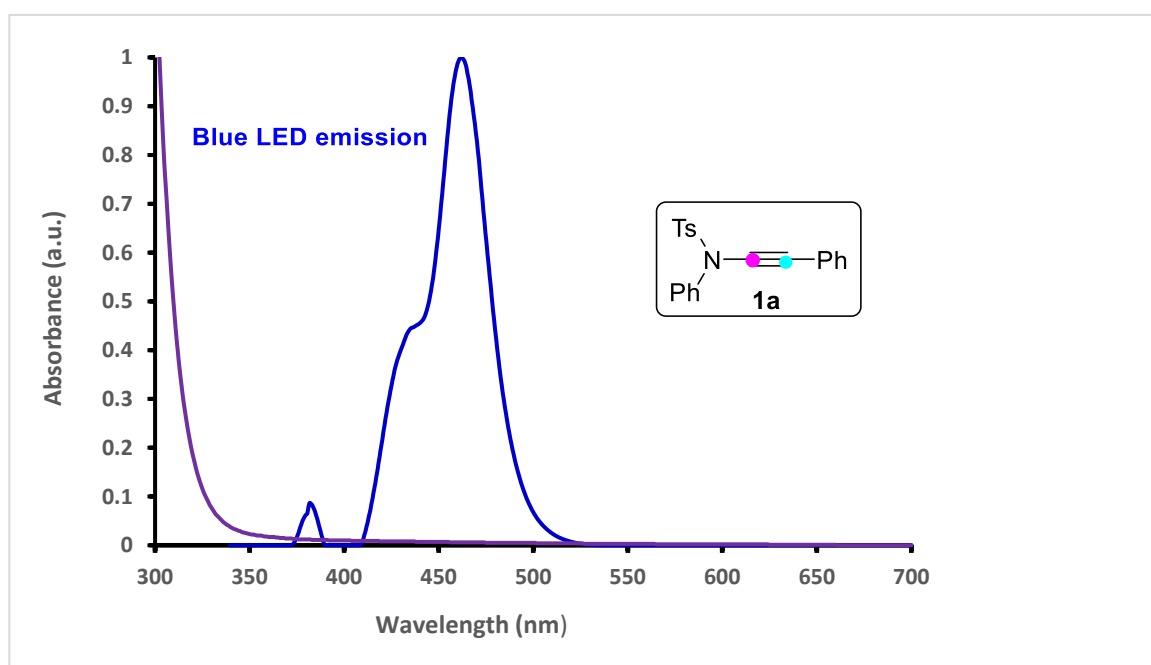

**Figure S10.** Absorption spectra of 4-methyl-N-phenyl-N-(phenylethynyl)benzenesulfonamide (**1a**) ( $10^{-3}$  M) in MeCN, and blue LED emission.

## 6. Characterization data

**(E)-N-(2-iodo-2-phenyl-1-tosylvinyl)-4-methyl-N-phenylbenzenesulfonamide (3aa):** The title compound

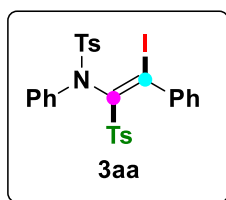

was prepared according to the general procedure (A) via column chromatography of silica eluting hexane-ethyl acetate (87:13) to obtain as a light white solid (66 mg, yield = 66%); Mp. 139.4-140 °C;  $^1\text{H}$  NMR (400 MHz,  $\text{CDCl}_3$ )  $\delta$  7.96 (d,  $J$  = 8.2 Hz, 2H), 7.70 (d,  $J$  = 8.3 Hz, 2H), 7.42-7.37 (m, 4H), 7.32 (d,  $J$  = 8.2 Hz, 2H), 7.15 (dt,  $J$  = 23.2, 7.1 Hz, 4H), 7.02 (d,  $J$  = 27.6 Hz, 1H), 7.06 (brs, 1H), 6.96 (d,  $J$  = 8.1 Hz, 2H), 6.75 (brs, 1H), 2.36 (s, 3H), 2.33 (s, 3H).  $^{13}\text{C}$  NMR (101 MHz,  $\text{CDCl}_3$ )  $\delta$  147.9, 144.0, 143.5, 140.0, 138.9, 137.3, 135.9, 131.4, 130.3, 129.2, 129.1, 129.0, 128.6, 128.5, 128.3, 127.8, 127.5, 123.7, 21.5, 21.5. HRMS (ESI) calculated  $[\text{M}+\text{Na}]^+$  for  $\text{C}_{28}\text{H}_{24}\text{NO}_4\text{NaS}_2\text{I}$  = 652.0089; found: 652.0086.

**(E)-N-(2-iodo-2-(p-tolyl)-1-tosylvinyl)-4-methyl-N-phenylbenzenesulfonamide (3ba):** The title compound

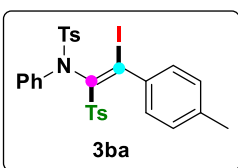

was prepared according to the general procedure (A) via column chromatography of silica eluting hexane-ethyl acetate (90:10) to obtain as a pale-yellow solid (60 mg, yield = 62%); Mp. 204-205 °C;  $^1\text{H}$  NMR (400 MHz,  $\text{CDCl}_3$ )  $\delta$  7.94 (d,  $J$  = 6.7 Hz, 2H), 7.69 (d,  $J$  = 8.2 Hz, 2H), 7.39 (d,  $J$  = 7.4 Hz, 3H), 7.33 (d,  $J$  = 8.1 Hz, 2H), 7.16 (d,  $J$  = 8.1 Hz, 2H), 6.96 (d,  $J$  = 8.0 Hz, 2H), 6.81 (brs, 4H), 2.36 (s, 3H), 2.34 (s, 3H), 2.28 (s, 3H).  $^{13}\text{C}$  NMR (101 MHz,  $\text{CDCl}_3$ )  $\delta$  147.7, 144.0, 143.5, 139.5, 139.0, 137.3, 137.2, 136.0, 131.4, 130.3, 129.1, 129.1, 128.8, 128.6, 128.6, 128.3, 127.8, 124.2, 21.6, 21.5, 21.3. HRMS (ESI) calculated  $[\text{M}+\text{Na}]^+$  for  $\text{C}_{29}\text{H}_{26}\text{NO}_4\text{NaS}_2\text{I}$  = 666.0246; found: 666.0244.

**(E)-N-(2-(4-ethylphenyl)-2-iodo-1-tosylvinyl)-4-methyl-N-phenylbenzenesulfonamide (3ca):** The title

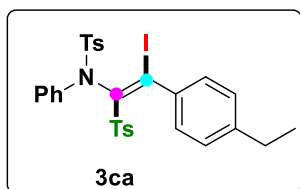

compound was prepared according to the general procedure (A) via column chromatography of silica eluting hexane-ethyl acetate (90:10) to obtain as a white solid (57 mg, yield = 57%); Mp. 204-205 °C;  $^1\text{H}$  NMR (400 MHz,  $\text{CDCl}_3$ )  $\delta$  7.95 (dd,  $J$  = 7.9, 1.6 Hz, 2H), 7.68 (d,  $J$  = 8.3 Hz, 2H), 7.41 (dt,  $J$  = 12.6, 4.2 Hz, 3H), 7.34 (d,  $J$  = 8.3 Hz, 2H), 7.16 (d,  $J$  = 8.2 Hz, 2H), 6.96 (d,  $J$  = 8.1 Hz, 2H), 6.83 (brs, 3H), 2.56 (q,  $J$  = 7.6 Hz, 2H), 2.36 (s, 3H), 2.33 (s, 3H), 1.22 (t,  $J$  = 7.6 Hz, 3H).  $^{13}\text{C}$  NMR (101 MHz,  $\text{CDCl}_3$ )  $\delta$  147.6, 145.8, 144.0, 143.4, 139.0, 137.4, 135.1, 129.2, 129.1, 128.9, 128.6, 128.6, 128.3, 127.8, 126.9, 124.3, 28.7, 21.6, 21.5, 15.6. HRMS (ESI) calculated  $[\text{M}+\text{Na}]^+$  for  $\text{C}_{30}\text{H}_{28}\text{NO}_4\text{NaS}_2\text{I}$  = 680.0402; found: 680.0405.

**(E/Z)-N-(2-iodo-2-(2-methoxyphenyl)-1-tosylvinyl)-4-methyl-N-phenylbenzenesulfonamide (3da):** The title

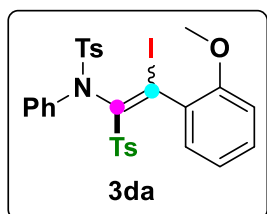

compound was prepared according to the general procedure (A) via column chromatography of silica eluting hexane-ethyl acetate (81:19) to obtain mixture of *E/Z* (63:37) isomers as a yellow solid (42 mg, yield = 41%); Mp. 142-143 °C;  $^1\text{H}$  NMR (400 MHz,  $\text{CDCl}_3$ )  $\delta$  7.50 (d,  $J$  = 8.3 Hz, 2H), 7.28 (d,  $J$  = 1.6 Hz, 2H), 7.09 (d,  $J$  = 8.3 Hz, 2H), 7.00 (d,  $J$  = 8.1 Hz, 2H), 6.55 (d,  $J$  = 8.3 Hz, 2H), 6.42 (d,  $J$  = 8.3 Hz, 2H), 3.88 (s, 3H), 3.87 (s, 3H), 3.30 (s, 2H), 3.28 (s, 2H), 2.32 (s, 3H), 2.30 (s, 6H).  $^{13}\text{C}$  NMR (101 MHz,  $\text{CDCl}_3$ )  $\delta$  203.0, 166.3, 166.0, 149.1,

144.3, 144.0, 141.1, 140.8, 140.4, 137.6, 132.4, 130.3, 129.2, 129.2, 128.8, 128.5, 128.4, 127.5, 127.4, 127.1, 111.1, 67.0, 52.1, 52.0, 42.2, 31.4, 26.7, 21.5. HRMS (ESI) calculated  $[M+Na]^+$  for  $C_{29}H_{26}NO_5NaS_2I = 682.0195$ ; found: 682.0196.

**(E)-N-(2-(3-chlorophenyl)-2-iodo-1-tosylvinyl)-4-methyl-N-phenylbenzenesulfonamide (3ea):** The title

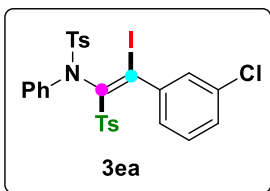

compound was prepared according to the general procedure (A) via column chromatography of silica eluting hexane-ethyl acetate (90:10) to obtain as a pale-yellow solid (44 mg, yield = 43%); Mp. 221 - 222 °C;  $^1H$ NMR (400 MHz,  $CDCl_3$ )  $\delta$  7.93 (d,  $J = 8.2$  Hz, 2H), 7.68 (d,  $J = 8.4$  Hz, 2H), 7.43 – 7.35 (m, 5H), 7.17 (d,  $J = 8.1$  Hz, 2H), 7.05 (d,  $J = 8.0$  Hz, 3H), 6.99 (brs, 2H), 6.66 (brs, 1H), 2.37 (s, 3H), 2.36 (s, 3H).  $^{13}C$  NMR (101 MHz,  $CDCl_3$ )  $\delta$  148.7, 144.2, 144.0, 138.8, 138.4, 137.2, 135.8, 135.4, 129.2, 129.1, 129.1, 128.7, 128.4, 127.8, 121.7, 21.6. HRMS (ESI) calculated  $[M+Na]^+$  for  $C_{28}H_{23}ClINNaO_4S_2 = 685.9693$ ; found: 685.9696.

**(E)-N-(2-iodo-2-phenyl-1-tosylvinyl)-4-methyl-N-(p-tolyl)benzenesulfonamide (3fa):** The title compound

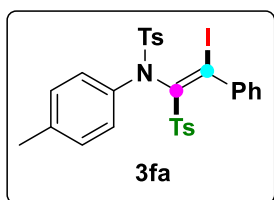

was prepared according to the general procedure (A) via column chromatography of silica eluting hexane-ethyl acetate (91:9) to obtain as a white solid (59 mg, yield = 59%); Mp. 153-154 °C;  $^1H$ NMR (400 MHz,  $CDCl_3$ )  $\delta$  7.83 (d,  $J = 8.1$  Hz, 2H), 7.68 (d,  $J = 8.2$  Hz, 2H), 7.32 (d,  $J = 8.1$  Hz, 2H), 7.19 (dd,  $J = 10.9, 8.5$  Hz, 4H), 7.10 (brs, 2H), 6.96 (d,  $J = 8.0$  Hz, 3H), 6.68 (brs, 1H), 2.39 (s, 3H), 2.37 (s, 3H), 2.33 (s, 3H).  $^{13}C$  NMR (101 MHz,  $CDCl_3$ )  $\delta$  148.1, 143.9, 143.5, 140.0, 138.5, 137.4, 136.3, 136.0, 131.5, 130.4, 129.8, 129.1, 129.0, 128.8, 128.6, 127.8, 123.4, 21.6, 21.5, 21.2. HRMS (ESI) calculated  $[M+Na]^+$  for  $C_{29}H_{26}NO_4NaS_2I = 666.0246$ ; found: 666.0252.

**(E)-N-(4-ethylphenyl)-N-(2-iodo-2-phenyl-1-tosylvinyl)-4-methylbenzenesulfonamide (3ga):** The title

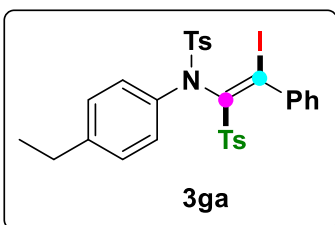

compound was prepared according to the general procedure (A) via column chromatography of silica eluting hexane-ethyl acetate (92:8) to obtain as a yellow solid (55 mg, yield = 55%); Mp. 200-201 °C;  $^1H$ NMR (400 MHz,  $CDCl_3$ )  $\delta$  7.84 (d,  $J = 8.5$  Hz, 2H), 7.67 (d,  $J = 8.4$  Hz, 2H), 7.31 (d,  $J = 8.3$  Hz, 2H), 7.22 (d,  $J = 8.5$  Hz, 2H), 7.17 (d,  $J = 8.1$  Hz, 2H), 7.11-7.16 (m, 2H), 6.96 (d,  $J = 8.1$  Hz, 3H), 6.70 (s, 1H), 2.70 (q,  $J = 7.6$  Hz, 2H), 2.37 (s, 3H), 2.33 (s, 3H), 1.28 (t,  $J = 7.6$  Hz, 3H).  $^{13}C$  NMR (101 MHz,  $CDCl_3$ )  $\delta$  148.0, 144.7, 143.9, 143.5, 140.1, 137.4, 136.4, 136.1, 129.1, 129.0, 128.9, 128.6, 127.8, 123.4, 28.5, 21.6, 21.5, 15.2. HRMS (ESI) calculated  $[M+Na]^+$  for  $C_{30}H_{28}NO_4NaS_2I = 680.0402$ ; found: 680.0401.

**(E)-N-benzyl-N-(2-iodo-2-phenyl-1-tosylvinyl)-4-methylbenzenesulfonamide (3ha):** The title compound

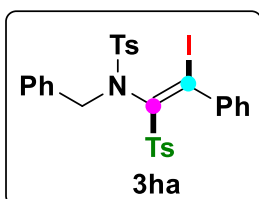

was prepared according to the general procedure (A) via column chromatography of silica eluting hexane-ethyl acetate (92:8) to obtain mixture as a white solid (25 mg, yield = 25%); Mp. 197-198 °C;  $^1H$ NMR (400 MHz,  $CDCl_3$ )  $\delta$  8.09 (d,  $J = 8.3$  Hz, 2H), 7.57 (dd,  $J = 6.3, 3.1$  Hz, 2H), 7.41 – 7.33 (m, 5H), 7.18 (d,  $J = 8.3$  Hz, 2H), 7.06 (t,  $J = 6.9$  Hz, 2H), 6.93 (d,  $J = 8.1$  Hz, 2H), 6.85 (brs, 2H), 6.56 (brs, 1H), 5.06 (d,  $J = 13.8$  Hz, 1H), 4.67 (d,  $J = 13.7$  Hz, 1H), 2.46 (s, 3H), 2.31 (s, 3H).  $^{13}C$  NMR (101 MHz,  $CDCl_3$ )  $\delta$  145.3, 144.2, 143.4, 140.3, 137.6, 136.6, 133.2, 131.5,

129.2, 129.2, 129.0, 128.8, 128.7, 128.2, 127.5, 125.3, 54.0, 21.7, 21.5. HRMS (ESI) calculated  $[M+Na]^+$  for  $C_{29}H_{26}NO_4NaS_2I = 666.0246$ ; found: 666.0252.

**(E)-N-(2-iodo-2-phenyl-1-tosylvinyl)-4-methyl-N-propylbenzenesulfonamide (3ia):** The title compound was

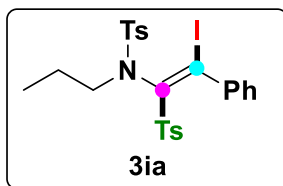

prepared according to the general procedure (A) via column chromatography of silica eluting hexane-ethyl acetate (88:12) to obtain as a white solid (19 mg, yield = 20%); Mp. 174-174 °C;  $^1H$ NMR (400 MHz,  $CDCl_3$ )  $\delta$  8.02 (d,  $J = 8.2$  Hz, 2H), 7.84 (d,  $J = 8.2$  Hz, 1H), 7.42 (d,  $J = 8.1$  Hz, 1H), 7.33 (d,  $J = 8.1$  Hz, 2H), 7.23 (d,  $J = 8.2$  Hz, 2H),

7.13 (t,  $J = 7.0$  Hz, 1H), 7.03 (brs, 2H), 6.96 (d,  $J = 8.1$  Hz, 2H), 3.78 – 3.68 (m, 1H), 3.66 – 3.55 (m, 1H), 2.43 (s, 3H), 2.32 (s, 3H), 2.06 – 1.79 (m, 3H), 0.97 (t,  $J = 7.4$  Hz, 3H).  $^{13}C$  NMR (101 MHz,  $CDCl_3$ )  $\delta$  148.1, 146.5, 144.0, 143.5, 140.2, 137.3, 136.5, 131.4, 130.3, 129.1, 129.0, 129.0, 128.1, 127.9, 127.6, 123.8, 52.3, 23.0, 21.8, 21.6, 21.5, 11.5. HRMS (ESI) calculated  $[M+Na]^+$  for  $C_{25}H_{26}NO_4NaS_2I = 618.0246$ ; found: 618.0253.

**(E)-N-(1-((4-(tert-butyl)phenyl)sulfonyl)-2-iodo-2-phenylvinyl)-4-methyl-N-phenylbenzenesulfonamide (3ab):** The title compound was prepared according to the general procedure (A) via

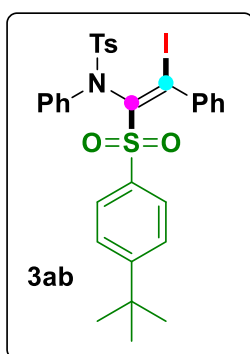

column chromatography of silica eluting hexane-ethyl acetate (90:10) to obtain as a white solid (46 mg, yield = 45%); Mp. 201-202 °C;  $^1H$ NMR (400 MHz,  $CDCl_3$ )  $\delta$  8.00 – 7.94 (m, 2H), 7.68 (d,  $J = 8.4$  Hz, 2H), 7.44 – 7.38 (m, 5H), 7.18 (dd,  $J = 11.5, 8.6$  Hz, 5H), 7.09 (s, 2H), 6.83 (brs, 1H), 6.65 (brs, 1H), 2.36 (s, 3H), 1.30 (s, 9H).  $^{13}C$  NMR (101 MHz,  $CDCl_3$ )  $\delta$  156.4, 148.0, 144.0, 140.0, 138.9, 137.1, 135.9, 129.2, 129.1, 129.0, 128.7, 128.6, 128.4, 127.6, 125.5, 123.8, 35.0, 31.0, 21.6. HRMS (ESI) calculated  $[M]^+$

for  $C_{31}H_{30}NO_4S_2I = 671.0661$ ; found: 671.0662.

**(E)-4-iodo-N-(2-iodo-2-phenyl-1-tosylvinyl)-N-phenylbenzenesulfonamide (3ja):** The title compound was

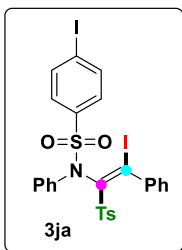

prepared according to the general procedure (A) via column chromatography of silica eluting hexane-ethyl acetate (91:9) to obtain as a pale-yellow solid (63 mg, yield = 58%); Mp. 166-167 °C;  $^1H$ NMR (400 MHz,  $CDCl_3$ )  $\delta$  7.96 (d,  $J = 8.1$  Hz, 2H), 7.72 (d,  $J = 8.7$  Hz, 2H), 7.49 – 7.41 (m, 5H), 7.31 (d,  $J = 8.3$  Hz, 2H), 7.12 (t,  $J = 7.0$  Hz, 2H), 6.97 (d,  $J = 8.1$  Hz, 3H), 6.94 – 6.82 (m, 1H), 6.68 (brs, 1H), 2.34 (s, 3H).  $^{13}C$  NMR (101 MHz,  $CDCl_3$ )  $\delta$  147.6, 143.7, 139.8, 138.6,

138.4, 137.2, 137.1, 130.3, 129.4, 129.2, 129.1, 128.8, 128.7, 128.3, 127.8, 127.5, 124.2, 101.1, 21.5. HRMS (ESI) calculated  $[M+Na]^+$  for  $C_{27}H_{21}I_2NNaO_4S_2 = 763.8893$ ; found: 763.8892.

**(E)-N-(2-iodo-2-phenyl-1-tosylvinyl)-N-phenylanthracene-2-sulfonamide (3ka):** The title compound was

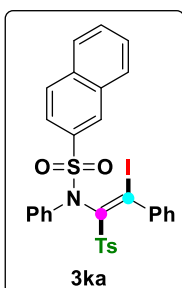

prepared according to the general procedure (A) via column chromatography of silica eluting hexane-ethyl acetate (88:12) to obtain as a pale-yellow solid (44 mg, yield = 43%); Mp. 188-189 °C;  $^1H$ NMR (400 MHz,  $CDCl_3$ )  $\delta$  8.38 (s, 1H), 8.00 – 7.94 (m, 2H), 7.89 – 7.79 (m, 5H), 7.56 (dt,  $J = 14.6, 6.9$  Hz, 3H), 7.44 – 7.31 (m, 6H), 7.12 (d,  $J = 6.8$  Hz, 2H), 6.98 (d,  $J = 7.9$  Hz, 3H), 6.77 (brs, 1H), 2.35 (s, 3H).  $^{13}C$  NMR (101 MHz,  $CDCl_3$ )  $\delta$  148.0, 143.6, 140.1, 139.0,

137.3, 136.0, 135.1, 131.6, 130.8, 129.5, 129.3, 129.2, 129.1, 129.1, 128.8, 128.8, 128.5, 127.9, 127.9, 127.7, 127.7, 127.1, 124.3, 123.7, 21.5. HRMS (ESI) calculated  $[M+Na]^+$  for  $C_{31}H_{24}INNaO_4S_2 = 688.0083$ ; found: 688.0085.

**(*E/Z*)-*tert*-butyl (2-iodo-2-phenyl-1-tosylvinyl)(phenyl)carbamate (3la):** The title compound was prepared

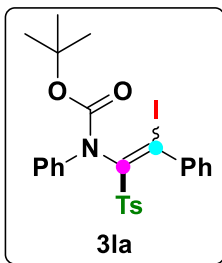

according to the general procedure (A) via column chromatography of silica eluting hexane-ethyl acetate (92:8) to obtain mixture of *E/Z* (62:38) isomers as a pale-yellow solid (53 mg, yield = 60%); Mp. 115-116 °C;  $^1H$ NMR (400 MHz,  $CDCl_3$ )  $\delta$  7.61 (d,  $J = 7.6$  Hz, 1.88H), 7.56 (d,  $J = 7.8$  Hz, 1.36H), 7.44 (d,  $J = 7.5$  Hz, 1.07H), 7.42 – 7.29 (m, 5.8H), 7.29 – 7.13 (m, 7.16H), 7.11 (d,  $J = 8.1$  Hz, 2.25H), 7.01 (s, 1.14H), 6.98 (d,  $J = 8.1$  Hz, 2.29H), 2.35 (s, 1.83H), 2.32 (s, 2.99H), 1.67 (s, 5.68H), 1.58 (s, 9H).  $^{13}C$  NMR (101 MHz,  $CDCl_3$ )  $\delta$  150.5, 145.7, 144.7, 139.6,

136.9, 136.9, 135.6, 131.3, 130.1, 129.3, 129.1, 128.9, 128.8, 128.5, 128.4, 128.2, 127.9, 127.8, 126.6, 1256.0, 125.5, 124.3, 114.3, 83.5, 82.9, 28.1, 28.1, 21.6, 21.5. HRMS (ESI) calculated  $[M+Na]^+$  for  $C_{26}H_{26}INNaO_4S = 598.05194$ ; found: 598.05207.

**4,4'-(2-iodo-2-phenylethene-1,1-diyl)disulfonyl)bis(methylbenzene) (4a):** The title compound was prepared according to the general procedure (B) via column chromatography of silica eluting hexane-ethyl acetate (91:9)

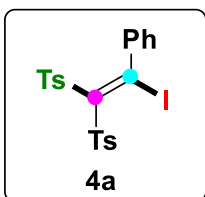

to obtain as a pale-yellow solid (66 mg, yield = 80%); Mp. 145-146 °C;  $^1H$ NMR (600 MHz,  $CDCl_3$ )  $\delta$  8.20 (d,  $J = 8.4$  Hz, 2H), 7.50 (d,  $J = 8.4$  Hz, 2H), 7.39 (d,  $J = 8.5$  Hz, 2H), 7.29 – 7.22 (m, 3H), 7.17 (d,  $J = 8.5$  Hz, 2H), 7.09 – 6.99 (m, 2H), 2.49 (s, 3H), 2.39 (s, 3H).  $^{13}C$  NMR (101 MHz,  $CDCl_3$ )  $\delta$  150.2, 145.4, 144.7, 144.5, 137.9, 136.4, 129.7, 129.5, 129.5,

129.3, 128.4, 127.8, 127.6, 126.4, 21.8, 21.6. HRMS (ESI) calculated  $[M+H]^+$  for  $C_{22}H_{20}O_4S_2I = 538.9848$ ; found: 538.9850.

**phenyl (*E*)-3-iodo-3-phenyl-2-tosylacrylate (5a):** The title compound was prepared according to the general procedure (B) via column chromatography of silica eluting hexane-ethyl acetate (93:7) to obtain as a white solid

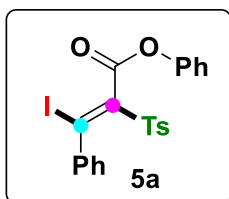

(54 mg, yield = 70%); Mp. 98- 99 °C;  $^1H$ NMR (400 MHz,  $CDCl_3$ )  $\delta$  7.50 – 7.42 (m, 2H), 7.37 (d,  $J = 8.3$  Hz, 2H), 7.35 – 7.24 (m, 6H), 7.13 (d,  $J = 8.3$  Hz, 4H), 2.39 (s, 3H).  $^{13}C$  NMR (101 MHz,  $CDCl_3$ )  $\delta$  162.2, 150.3, 146.2, 145.2, 139.4, 137.1, 129.8, 129.6, 129.4,

128.4, 127.9, 127.4, 126.7, 121.2, 115.0, 21.7. HRMS (ESI) calculated  $[M]^+$  for  $C_{22}H_{17}O_4SI = 503.9892$ ; found: 503.9896.

**(*E*)-3-iodo-*N*,3-diphenyl-2-tosylacrylamide (6a):** The title compound was prepared according to the general

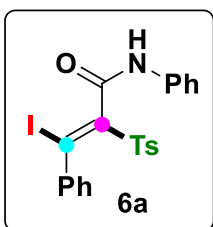

procedure (B) via column chromatography of silica eluting hexane-ethyl acetate (83:17) to obtain as a pale-yellow solid (65 mg, yield = 87%); Mp. 206-207 °C;  $^1H$ NMR (400 MHz,  $CDCl_3$ )  $\delta$  7.97 (s, 1H), 7.59 (d,  $J = 7.7$  Hz, 2H), 7.53 (d,  $J = 8.3$  Hz, 2H), 7.39 (t,  $J = 7.8$  Hz, 2H), 7.33 – 7.28 (m, 3H), 7.20 (d,  $J = 7.9$  Hz, 5H), 2.40 (s, 3H).  $^{13}C$  NMR (101 MHz,  $CDCl_3$ )  $\delta$  161.8, 147.2, 145.2, 140.5, 136.8, 129.6, 129.6, 129.1, 128.4, 127.9, 127.0, 125.4, 120.5,

116.0, 21.7. HRMS (ESI) calculated  $[M+Na]^+$  for  $C_{22}H_{18}INNaO_3S = 525.9944$ ; found: 525.9941.

**(E)-4-iodo-4-phenyl-3-tosylbut-3-en-2-ol (7a):** The title compound was prepared according to the general

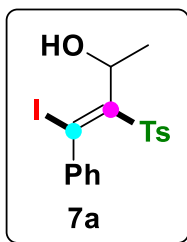

procedure (B) via column chromatography of silica eluting hexane-ethyl acetate (90:10) to obtain as a white solid (47 mg, yield = 79%); Mp. 128-129 °C;  $^1\text{H}$ NMR (400 MHz,  $\text{CDCl}_3$ )  $\delta$  7.15 (d,  $J = 8.3$  Hz, 2H), 7.13 (d,  $J = 7.4$  Hz, 1H), 7.00 (d,  $J = 8.2$  Hz, 3H), 6.96 (s, 1H), 6.72 (brs, 1H), 5.18 (q,  $J = 6.8$  Hz, 1H), 3.84 (brs, 1H), 2.34 (s, 3H), 1.83 (d,  $J = 6.8$  Hz, 3H).  $^{13}\text{C}$  NMR (101 MHz,  $\text{CDCl}_3$ )  $\delta$  150.0, 143.8, 141.6, 138.0, 129.0, 128.6, 127.4, 127.1, 115.6, 79.1, 22.2, 21.5. HRMS (ESI) calculated  $[\text{M}+\text{Na}]^+$  for  $\text{C}_{17}\text{H}_{17}\text{INaO}_3\text{S} = 450.9835$ ; found: 450.9837.

**(E)-3-iodo-1,3-diphenyl-2-tosylallyl acetate (8a):** The title compound was prepared according to the general

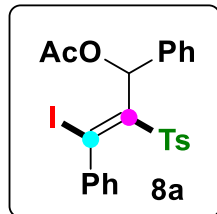

procedure (B) via column chromatography of silica eluting hexane-ethyl acetate (87:13) to obtain as a white solid (71 mg, yield = 88%); Mp. 142-143 °C;  $^1\text{H}$ NMR (400 MHz,  $\text{CDCl}_3$ )  $\delta$  7.59 (d,  $J = 7.6$  Hz, 2H), 7.45 – 7.34 (m, 4H), 7.21 (d,  $J = 30.9$  Hz, 3H), 7.05 (s, 1H), 6.97 (d,  $J = 8.2$  Hz, 2H), 6.91 (d,  $J = 8.1$  Hz, 2H), 6.77 (s, 1H), 2.34 (s, 3H), 2.29 (s, 3H).  $^{13}\text{C}$  NMR (101 MHz,  $\text{CDCl}_3$ )  $\delta$  169.8, 147.1, 143.6, 142.6, 137.8, 136.2, 128.8, 128.7, 128.3, 127.9, 127.7, 127.6, 127.5, 125.5, 119.8, 79.5, 21.4, 21.0. HRMS (ESI) calculated  $[\text{M}+\text{Na}]^+$  for  $\text{C}_{24}\text{H}_{21}\text{INaO}_4\text{S} = 555.0097$ ; found: 555.0098.

**(E/Z)-1-((1-bromo-2-iodo-2-phenylvinyl)sulfonyl)-4-methylbenzene (9a):** The title compound was prepared

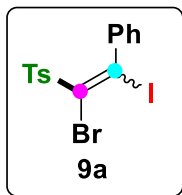

according to the general procedure (B) via column chromatography of silica eluting hexane-ethyl acetate (95:5) to obtain mixture of *E/Z* (92:8) isomers as a pale-yellow solid (57 mg, yield = 83%); Mp. 144-145 °C;  $^1\text{H}$ NMR (400 MHz,  $\text{CDCl}_3$ )  $\delta$  8.02 (d,  $J = 8.3$  Hz, 0.14H), 7.56 (d,  $J = 8.3$  Hz, 1.94H), 7.42 – 7.35 (m, 0.35H), 7.31 (dd,  $J = 5.0, 1.7$  Hz, 3H), 7.26 – 7.19 (m, 4.04H), 7.16 – 7.13 (m, 0.19H), 2.48 (s, 0.23H), 2.42 (s, 3H).  $^{13}\text{C}$  NMR (101 MHz,  $\text{CDCl}_3$ )  $\delta$  156.0, 156.0, 145.1, 142.3, 135.9, 132.4, 129.8, 129.6, 129.3, 129.1, 128.7, 128.4, 127.8, 127.0, 126.6, 119.9, 29.6, 21.7. HRMS (ESI) calculated  $[\text{M}+\text{Na}]^+$  for  $\text{C}_{15}\text{H}_{12}\text{BrINaO}_2\text{S} = 484.8678$ ; found: 484.8679.

**(Z)-(2-iodo-2-phenyl-1-tosylvinyl)(phenyl)selane (10a):** The title compound was prepared according to the

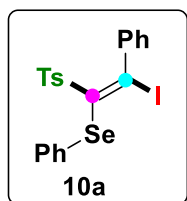

general procedure (B) via column chromatography of silica eluting hexane-ethyl acetate (94:6) to obtain as a yellow solid (48 mg, yield = 58%); Mp. 154-155 °C;  $^1\text{H}$ NMR (400 MHz,  $\text{CDCl}_3$ )  $\delta$  7.52 – 7.47 (m, 2H), 7.45 (d,  $J = 8.3$  Hz, 2H), 7.32 – 7.28 (m, 3H), 7.27 – 7.23 (m, 3H), 7.21 – 7.17 (m, 2H), 7.09 (d,  $J = 8.1$  Hz, 2H), 2.36 (s, 3H).  $^{13}\text{C}$  NMR (101 MHz,  $\text{CDCl}_3$ )  $\delta$  144.9, 144.2, 143.8, 136.6, 131.6, 131.5, 131.3, 129.4, 129.2, 129.1, 128.6, 127.8, 127.8, 126.9, 21.6. HRMS (ESI) calculated  $[\text{M}+\text{Na}]^+$  for  $\text{C}_{21}\text{H}_{17}\text{INaO}_2\text{SSe} = 562.9051$ ; found: 562.9052.

**1-methyl-4-((phenylethynyl)sulfonyl)benzene (11a')**: The title compound was prepared according to the

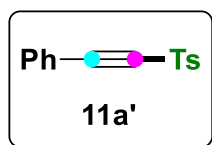

general procedure (B) via column chromatography of silica eluting hexane-ethyl acetate (96:4) to obtain as a yellow solid (8 mg, yield = 20%); Mp. 78-79 °C;  $^1\text{H}$ NMR (400 MHz,  $\text{CDCl}_3$ )  $\delta$  7.96 (d,  $J = 8.3$  Hz, 2H), 7.55 – 7.50 (m, 2H), 7.50 – 7.44 (m, 1H), 7.42 – 7.34 (m,

4H), 2.47 (s, 3H).  $^{13}\text{C}$  NMR (101 MHz,  $\text{CDCl}_3$ )  $\delta$  145.3, 138.9, 132.7, 131.4, 130.0, 128.6, 127.5, 118.0, 92.9, 85.6, 21.7. HRMS (ESI) calculated  $[\text{M}+\text{Na}]^+$  for  $\text{C}_{15}\text{H}_{12}\text{NaO}_2\text{S} = 279.04502$ ; found: 279.04524.

**(E)-4-iodo-4-phenyl-3-tosylbut-3-en-1-ol (12a):** The title compound was prepared according to the general

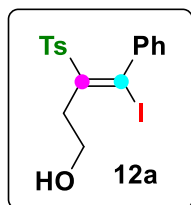

procedure (B) via column chromatography of silica eluting hexane-ethyl acetate (78:22) to obtain as a yellow solid (60 mg, yield = 93%); Mp. 124-125 °C;  $^1\text{H}$ NMR (400 MHz,  $\text{CDCl}_3$ )  $\delta$  7.27 (d,  $J = 8.3$  Hz, 2H), 7.19 – 7.10 (m, 3H), 7.05 (d,  $J = 8.4$  Hz, 2H), 6.97 (d,  $J = 6.8$  Hz, 2H), 4.06 (t,  $J = 6.6$  Hz, 2H), 3.26 (t,  $J = 6.6$  Hz, 2H), 2.41 (s, 1H), 2.35 (s, 3H).  $^{13}\text{C}$  NMR (101 MHz,  $\text{CDCl}_3$ )  $\delta$  146.1, 143.9, 142.4, 137.2, 129.3, 128.6, 127.6, 127.5, 117.4, 60.9, 42.1, 21.5. HRMS (ESI) calculated  $[\text{M}+\text{Na}]^+$  for  $\text{C}_{17}\text{H}_{17}\text{INaO}_3\text{S} = 450.9835$ ; found: 450.9838.

**(E)-5-iodo-5-phenyl-4-tosylpent-4-en-1-ol (13a):** The title compound was prepared according to the general

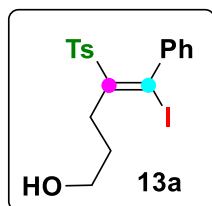

procedure (B) via column chromatography of silica eluting hexane-ethyl acetate (74:26) to obtain as a yellow solid (52 mg, yield = 79%); Mp. 136-137 °C;  $^1\text{H}$ NMR (400 MHz,  $\text{CDCl}_3$ )  $\delta$  7.24 (d,  $J = 7.9$  Hz, 2H), 7.21 – 7.11 (m, 3H), 7.07 (d,  $J = 7.8$  Hz, 2H), 6.99 (d,  $J = 7.0$  Hz, 2H), 3.81 (t,  $J = 5.8$  Hz, 2H), 3.03 (t,  $J = 4.0$  Hz, 2H), 2.35 (s, 3H), 2.16 (s, 1H), 2.11 – 2.01 (m, 2H).  $^{13}\text{C}$  NMR (101 MHz,  $\text{CDCl}_3$ )  $\delta$  148.3, 143.9, 142.6, 137.4, 129.3, 128.5, 127.7, 127.5, 127.5, 116.0, 61.8, 36.1, 31.2, 21.5. HRMS (ESI) calculated  $[\text{M}+\text{Na}]^+$  for  $\text{C}_{18}\text{H}_{19}\text{INaO}_3\text{S} = 464.9991$ ; found: 464.9993.

**(E)-3-iodo-3-phenyl-2-tosylallyl acetate (14a):** The title compound was prepared according to the general

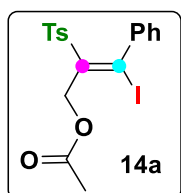

procedure (B) via column chromatography of silica eluting hexane-ethyl acetate (82:18) to obtain as a white solid (53 mg, yield = 74%); Mp. 163-164 °C;  $^1\text{H}$ NMR (597 MHz,  $\text{CDCl}_3$ )  $\delta$  7.30 (d,  $J = 8.2$  Hz, 2H), 7.25 – 7.18 (m, 3H), 7.11 (d,  $J = 8.1$  Hz, 2H), 7.06 (d,  $J = 7.0$  Hz, 2H), 5.29 (s, 2H), 2.37 (s, 3H), 2.11 (s, 3H).  $^{13}\text{C}$  NMR (150 MHz,  $\text{CDCl}_3$ )  $\delta$  170.1, 144.2, 143.5, 142.0, 137.2, 129.3, 129.1, 127.8, 127.6, 127.2, 123.5, 68.9, 21.5, 20.6. HRMS (ESI) calculated  $[\text{M}+\text{Na}]^+$  for  $\text{C}_{18}\text{H}_{17}\text{INaO}_4\text{S} = 478.9784$ ; found: 478.9783.

**(Z)-(2-iodo-2-phenyl-1-tosylvinyl)(phenyl)selane (15a):** The title compound was prepared according to the

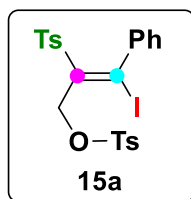

general procedure (B) via column chromatography of silica eluting hexane-ethyl acetate (83:17) to obtain as a white solid (79 mg, yield = 91%); Mp. 95-96 °C;  $^1\text{H}$ NMR (400 MHz,  $\text{CDCl}_3$ )  $\delta$  7.89 (d,  $J = 8.1$  Hz, 2H), 7.38 (d,  $J = 8.0$  Hz, 2H), 7.28 – 7.12 (m, 6H), 7.06 (d,  $J = 8.0$  Hz, 2H), 6.94 (d,  $J = 7.2$  Hz, 2H), 5.25 (s, 2H), 2.45 (s, 3H), 2.36 (s, 3H).  $^{13}\text{C}$  NMR (101 MHz,  $\text{CDCl}_3$ )  $\delta$  145.2, 144.4, 142.0, 141.7, 136.7, 132.1, 129.8, 129.3, 128.3, 127.8, 127.5, 127.0, 126.3, 73.3, 21.6, 21.5. HRMS (ESI) calculated  $[\text{M}+\text{Na}]^+$  for  $\text{C}_{23}\text{H}_{21}\text{INaO}_5\text{S}_2 = 590.9767$ ; found: 590.9765.

**(E)-1-((1-iodo-1-phenylhex-1-en-2-yl)sulfonyl)-4-methylbenzene (16a):** The title compound was prepared

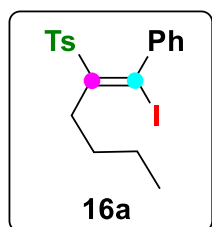

according to the general procedure (B) via column chromatography of silica eluting hexane-ethyl acetate (95:5) to obtain as a white solid (60 mg, yield = 90%); Mp. 84-85 °C;  $^1\text{H}$ NMR (400 MHz,  $\text{CDCl}_3$ )  $\delta$  7.23 (d,  $J = 8.3$  Hz, 2H), 7.20 – 7.11 (m, 3H), 7.06 (d,  $J = 8.0$  Hz, 2H),

6.99 (d,  $J = 6.5$  Hz, 2H), 2.93 – 2.87 (m, 2H), 2.35 (s, 3H), 1.75 (tt,  $J = 8.0, 6.5$  Hz, 2H), 1.49 (dd,  $J = 14.8, 7.4$  Hz, 2H), 1.00 (t,  $J = 7.3$  Hz, 3H).  $^{13}\text{C}$  NMR (101 MHz,  $\text{CDCl}_3$ )  $\delta$  149.0, 143.6, 142.7, 137.8, 129.2, 128.4, 127.8, 127.5, 115.0, 39.5, 30.3, 22.7, 21.5, 13.7. HRMS (ESI) calculated  $[\text{M}+\text{Na}]^+$  for  $\text{C}_{19}\text{H}_{21}\text{INaO}_2\text{S} = 463.0199$ ; found: 463.0196.

**(E)-1-((1-cyclopropyl-2-iodo-2-phenylvinyl)sulfonyl)-4-methylbenzene (17):** The title compound was

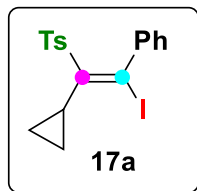

prepared according to the general procedure (B) via column chromatography of silica eluting hexane-ethyl acetate (95:5) to obtain as a white solid (51 mg, yield = 77%); Mp. 159-160 °C;  $^1\text{H}$ NMR (400 MHz,  $\text{CDCl}_3$ )  $\delta$  7.47 (d,  $J = 8.2$  Hz, 2H), 7.21-7.12 (m, 7H), 2.36 (s, 3H), 1.39 – 1.31 (m, 1H), 1.08 (d,  $J = 7.0$  Hz, 4H).  $^{13}\text{C}$  NMR (101 MHz,  $\text{CDCl}_3$ )  $\delta$  147.6, 143.6, 142.8, 137.6, 129.1, 128.9, 128.2, 127.8, 127.6, 119.8, 21.5, 20.6, 12.0. HRMS (ESI) calculated  $[\text{M}+\text{Na}]^+$  for  $\text{C}_{18}\text{H}_{17}\text{INaO}_2\text{S} = 446.9886$ ; found: 446.9888.

**4,4-diphenyl-3-tosylbut-3-en-1-ol (18):** The title compound was prepared according to the general procedure

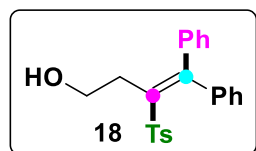

(C) via column chromatography of silica eluting hexane-ethyl acetate (75:25) to obtain as a white solid (79 mg, yield = 89%); Mp. 149-150 °C;  $^1\text{H}$ NMR (400 MHz,  $\text{CDCl}_3$ )  $\delta$  7.28 (ddd,  $J = 21.0, 14.3, 7.7$  Hz, 5H), 7.10 (ddd,  $J = 24.9, 16.0, 7.8$  Hz, 7H), 6.94 (d,  $J = 7.1$  Hz, 2H), 3.87 (t,  $J = 6.4$  Hz, 2H), 2.89 (t,  $J = 6.4$  Hz, 2H), 2.33 (s, 3H), 2.32 (s, 1H).  $^{13}\text{C}$  NMR (101 MHz,  $\text{CDCl}_3$ )  $\delta$  153.9, 143.2, 140.8, 140.0, 138.9, 138.0, 129.0, 128.8, 128.6, 128.0, 127.7, 127.5, 127.5, 127.4, 62.2, 33.8, 21.4. HRMS (ESI) calculated  $[\text{M}+\text{H}]^+$  for  $\text{C}_{24}\text{H}_{24}\text{O}_5\text{S}_2\text{I} = 583.0110$ ; found: 583.0103.

**(E)-4-iodo-4-phenyl-3-tosylbut-3-en-1-yl 4-methylbenzenesulfonate (19):** The title compound was prepared

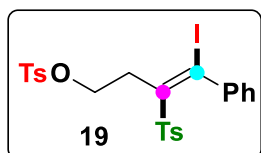

according to the general procedure (D) via column chromatography of silica eluting hexane-ethyl acetate (82:18) to obtain as a white solid (98 mg, yield = 72%); Mp. 133-134 °C;  $^1\text{H}$ NMR (597 MHz,  $\text{CDCl}_3$ )  $\delta$  7.87 (d,  $J = 8.3$  Hz, 2H), 7.37 (d,  $J = 8.0$  Hz, 2H), 7.19 (s, 2H), 7.17 (dt,  $J = 2.6, 2.0$  Hz, 1H), 7.16 – 7.12 (m, 2H), 7.07 (d,  $J = 8.0$  Hz, 2H), 6.94 (d,  $J = 7.0$  Hz, 2H), 4.40 (t,  $J = 7.5$  Hz, 2H), 3.34 – 3.29 (m, 2H), 2.45 (s, 3H), 2.35 (s, 3H).  $^{13}\text{C}$  NMR (150 MHz,  $\text{CDCl}_3$ )  $\delta$  144.9, 144.2, 143.7, 142.3, 136.8, 132.9, 129.9, 129.4, 128.7, 128.0, 127.6, 127.6, 127.3, 119.3, 67.0, 39.0, 21.6, 21.5. HRMS (ESI) calculated  $[\text{M}+\text{H}]^+$  for  $\text{C}_{23}\text{H}_{23}\text{O}_3\text{S} = 379.1368$ ; found: 379.1379.

**(E)-4-iodo-4-phenyl-3-tosylbut-3-en-1-yl 3-phenylpropiolate (20):** The title compound was prepared

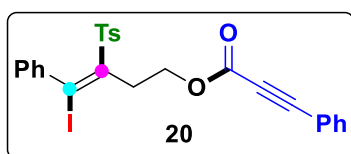

according to the general procedure (E) via column chromatography of silica eluting hexane-ethyl acetate (90:10) to obtain as a white solid (65 mg, yield = 50%); Mp. 165-166 °C;  $^1\text{H}$ NMR (400 MHz,  $\text{CDCl}_3$ )  $\delta$  7.60 (d,  $J = 7.0$  Hz, 2H), 7.45 (ddd,  $J = 6.6, 3.9, 1.3$  Hz, 1H), 7.38 (t,  $J = 7.4$  Hz, 2H), 7.27 (d,  $J = 8.4$  Hz, 2H), 7.22 – 7.12 (m, 3H), 7.07 (d,  $J = 8.1$  Hz, 2H), 7.00 (d,  $J = 6.6$  Hz, 2H), 4.63 (t,  $J = 7.3$  Hz, 2H), 3.40 (t,  $J = 7.3$  Hz, 2H), 2.35 (s, 3H).  $^{13}\text{C}$  NMR (101 MHz,  $\text{CDCl}_3$ )  $\delta$  153.8, 144.8, 144.1, 142.5, 137.2, 133.0, 130.7, 129.3, 128.7, 128.5, 127.7, 127.6, 127.5, 119.5, 118.6, 86.9, 80.5, 63.0, 38.5, 21.5. HRMS (ESI) calculated  $[\text{M}+\text{H}]^+$  for  $\text{C}_{26}\text{H}_{22}\text{O}_4\text{SI} = 557.0283$ ; found: 557.0281.



**(E)-4-iodo-4-phenyl-3-tosylbut-3-en-1-yl benzoate (21):** The title compound was prepared according to the

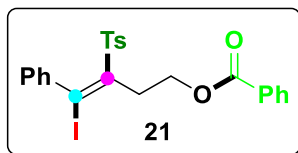

general procedure (F) via column chromatography of silica eluting hexane-ethyl acetate (89:11) to obtain as a white solid (106 mg, yield = 85%); Mp. 138-139 °C;

$^1\text{H}$ NMR (400 MHz,  $\text{CDCl}_3$ )  $\delta$  8.15 (d,  $J = 7.4$  Hz, 2H), 7.56 (t,  $J = 7.3$  Hz, 1H), 7.45 (t,  $J = 7.6$  Hz, 2H), 7.26 – 7.20 (m, 2H), 7.14 (dt,  $J = 20.2, 7.1$  Hz, 3H), 7.02 (d,  $J = 8.0$  Hz, 2H), 6.97 (d,  $J = 7.0$  Hz, 2H), 4.74 (t,  $J = 6.9$  Hz, 2H), 3.50 (t,  $J = 6.9$  Hz, 2H), 2.33 (s, 3H).  $^{13}\text{C}$  NMR (101 MHz,  $\text{CDCl}_3$ )  $\delta$  166.4, 145.6, 143.9, 142.4, 137.4, 132.9, 130.0, 129.7, 129.2, 128.6, 128.3, 127.6, 127.5, 127.5, 118.2, 62.3, 38.9, 21.5. HRMS (ESI) calculated  $[\text{M}+\text{H}]^+$  for  $\text{C}_{24}\text{H}_{22}\text{O}_4\text{SI}$  = 533.0283; found: 533.0287.

**(2-tosylethene-1,1-diyl)dibenzene (22)<sup>1</sup>:** The title compound was prepared according to the modified general

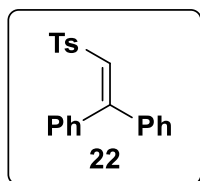

procedure (A) via column chromatography of silica eluting hexane-ethyl acetate (85:15) to

obtain as a white solid (12 mg, yield = 8%); Mp. 140-141 °C;  $^1\text{H}$ NMR (400 MHz,  $\text{CDCl}_3$ )  $\delta$  7.47 (d,  $J = 8.3$  Hz, 2H), 7.35 (ddd,  $J = 4.5, 3.7, 2.7$  Hz, 2H), 7.33 – 7.27 (m, 4H), 7.22 – 7.18 (m, 2H), 7.15 (dd,  $J = 8.5, 0.6$  Hz, 2H), 7.12 – 7.08 (m, 2H), 6.99 (s, 1H), 2.38 (s, 3H).  $^{13}\text{C}$  NMR (101 MHz,  $\text{CDCl}_3$ )  $\delta$  154.7, 143.7, 139.2, 138.6, 135.5, 130.2, 129.7, 129.3, 128.9, 128.8, 128.5, 128.2, 127.8, 127.7, 77.31, 21.53.

## 7. References

1. M. R. Mutra and J.-J. Wang. Photoinduced ynamide structural reshuffling and functionalization. *Nat. Commun.* **2022**, 13, 2345.
2. (a) P. Che, W. Cao, X. Li and D. Shi, *Adv. Synth. Catal.*, **2021**, 363, 4789-4794; (b) A. Y. Dubovtsev, V. V. Zvereva, N. V. Shcherbakov, D. V. Dar'in, A. S. Novikov and V. Y. Kukushkin, *Org. Biomol. Chem.*, **2021**, 19, 4577–4584; (c) X. Tian, L. Song, M. Rudolph, F. Rominger, T. Oeser and A. S. K. Hashmi, *Angew. Chem. Int. Ed.* **2019**, 58, 3589–3593.
3. J. Meesin, P. Katrun, C. Pareseecharoen, M. Pohmakotr, V. Reutrakul, D. Soorukram and C. Kuhakarn, *J. Org. Chem.* **2016**, 81, 7, 2744–2752.
4. P. Zeng, X. Huang, W. Tang and Z. Chen, *Org. Biomol. Chem.*, **2021**, 19, 10223-10227.
5. D. Qian and J. Zhang, *Chem. Commun.*, **2012**, 48, 7082-7084.
6. M. Yoshida, M. Higuchi and K. Shishido, *Org. Lett.* **2009**, 11, 20, 4752–4755.
7. S. Wang and L. Zhang, *J. Am. Chem. Soc.* **2006**, 128, 26, 8414–8415.
8. L. W. Bieber, M. F. da Silva and P. H. Menezes, *Tetrahedron Letters*, **2004**, 45, 2735–2737.
9. D. S. Rampon, R. Giovenardi, T. L. Silva, R. S. Rambo, A. A. Merlo, P. H. Schneider, *Eur. J. Org. Chem.* **2011**, 7066–7070.
10. M. Wagner, D. Schepmann, S. M. Ametamey and B. Wünsch, *Bioorg. Med. Chem.*, **2019**, 27, 3559–3567.
11. Y. Nishimoto, A. Okita, M. Yasuda and A. Baba, *Org. Lett.*, **2012**, 14, 1846–1849.
12. R. Tomita, T. Koike and M. Akita, *Chem. Commun.*, **2017**, 53, 4681-4684.
13. (a) M. R. Mutra, V. S. Kudale, J. Li, W.-H. Tsai and J.-J. Wang, *Green Chem.*, **2020**, 22, 2288-2300; (b) M. R. Mutra, J. Li. Chen, Y.-T.; Wang, J.-J. *Chem. Eur. J.*, **2022**, 28, e2022007.

7.97  
7.94  
7.71  
7.69  
7.42  
7.41  
7.39  
7.37  
7.33  
7.31  
7.19  
7.18  
7.16  
7.13  
7.12  
7.10  
7.06  
6.97  
6.95  
6.75

2.36  
2.33

Solvent  $\text{CDCl}_3$   
Spectrometer Frequency 400.40  
Nucleus  $^1\text{H}$

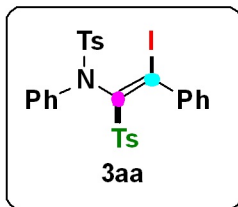

*Handwritten annotations:* A series of vertical lines and a diagonal slash, likely representing a handwritten integration curve or peak list for the aromatic region of the spectrum.

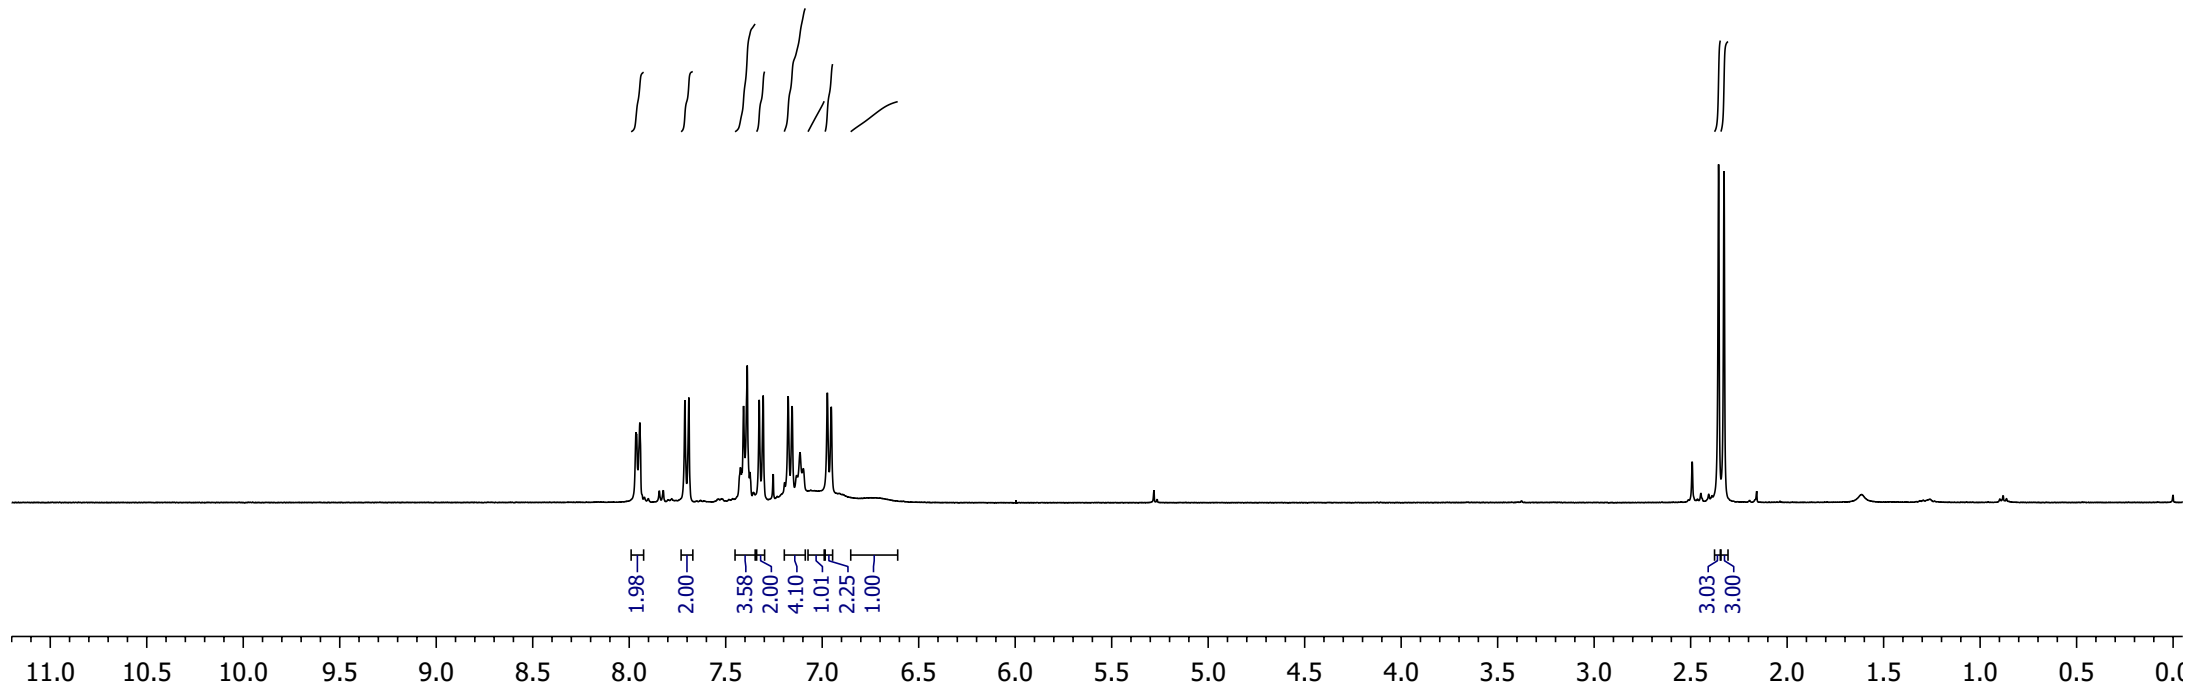

147.9  
144.0  
143.5  
140.0  
138.9  
137.3  
135.9  
131.4  
130.3  
129.2  
129.1  
129.0  
128.6  
128.5  
128.3  
127.8  
127.5  
123.7

77.3  
77.0  
76.7

21.6  
21.5

Solvent  $\text{CDCl}_3$   
Spectrometer Frequency 100.69  
Nucleus  $^{13}\text{C}$

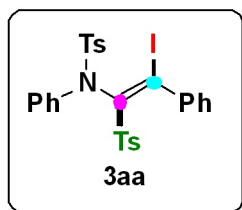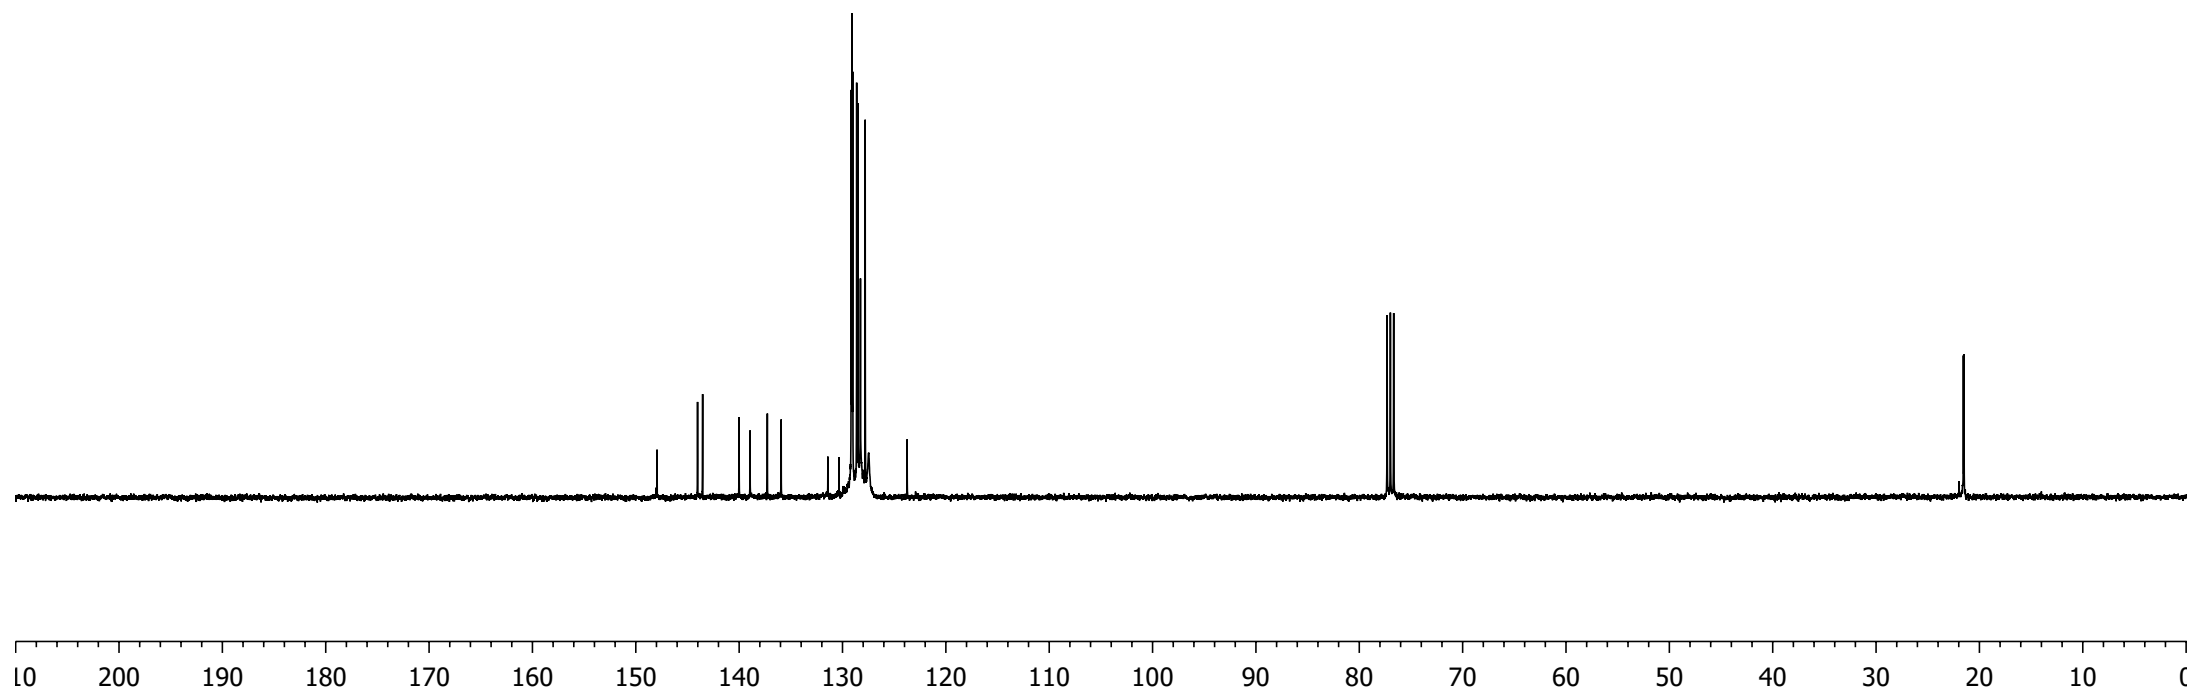

MR-CC-2D

exp15 NOESY

| SAMPLE         |            | FLAGS         |          |
|----------------|------------|---------------|----------|
| date           | Apr 6 2023 | hs            | nn       |
| solvent        | cdcl3      | sspul         | y        |
| sample         |            | PFgf1g        | y        |
| ACQUISITION    |            | hsglv1        | 1200     |
| sw             | 6410.3     | SPECIAL       | 1200     |
| at             | 0.150      | temp          | not used |
| np             | 1920       | gain          | 22       |
| fb             | not used   | spin          | 0        |
| ss             | 32         | F2 PROCESSING |          |
| d1             | 1.000      | gf            | 0.069    |
| nt             | 16         | gfs           | not used |
| 2D ACQUISITION |            | fn            | 4096     |
| sw1            | 6410.3     | F1 PROCESSING |          |
| ni             | 128        | gf1           | 0.016    |
| TRANSMITTER    |            | gfs1          | not used |
| tn             | H1         | proc1         | lp       |
| sfrq           | 400.392    | fn1           | 4096     |
| tof            | 387.0      | DISPLAY       |          |
| tpwr           | 55         | sp            | -82.2    |
| pw             | 12.300     | wp            | 4081.5   |
| NOESY          |            | sp1           | -82.2    |
| mixN           | 0.600      | wp1           | 4081.5   |
| PRESATURATION  |            | rf1           | 802.1    |
| satmode        | n          | rffp          | 0        |
| wet            | n          | rf11          | 802.1    |
| DECOUPLER      |            | rffp1         | 0        |
| dn             | C13        | PLOT          |          |
| dm             | nnn        | wc            | 140.0    |
|                |            | sc            | 5.0      |
|                |            | wc2           | 140.0    |
|                |            | sc2           | 5.0      |
|                |            | vs            | 1327     |
|                |            | th            | 6        |
|                |            | ai            | ph       |

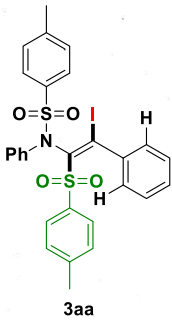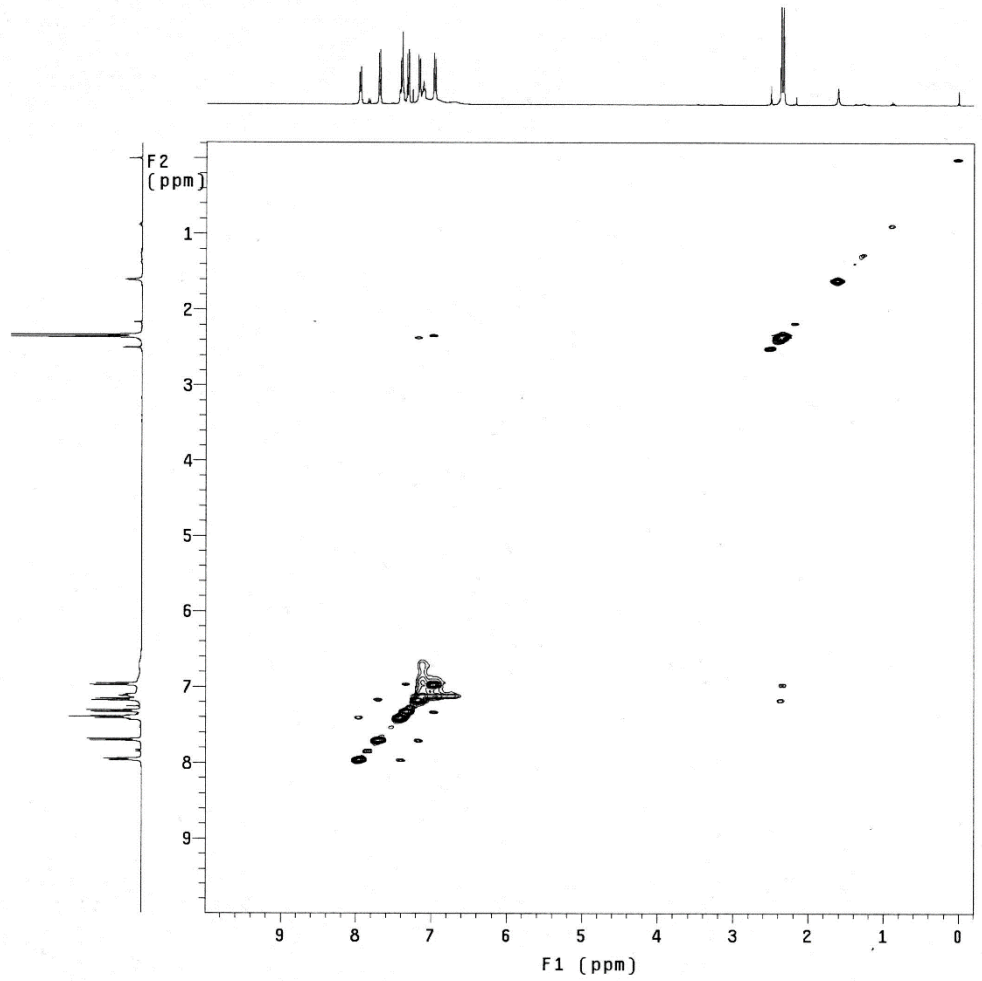

MR-CC-2D

exp14 gCOSY

| SAMPLE         |            | FLAGS         |          |
|----------------|------------|---------------|----------|
| date           | Apr 6 2023 | hs            | nn       |
| solvent        | cdc13      | sspu1         | y        |
| sample         |            | hsglv1        | 1200     |
| ACQUISITION    |            | SPECIAL       |          |
| sw             | 6410.3     | temp          | not used |
| at             | 0.150      | gain          | 22       |
| np             | 1920       | spin          | 0        |
| fb             | not used   | F2 PROCESSING |          |
| ss             | 32         | sb            | -0.075   |
| d1             | 1.000      | sbs           | not used |
| nt             | 20         | fn            | 4096     |
| 2D ACQUISITION |            | F1 PROCESSING |          |
| sw1            | 6410.3     | sb1           | -0.020   |
| ni             | 128        | sbs1          | not used |
| d2             | 0          | procl         | 1p       |
| PRESATURATION  |            | DISPLAY       |          |
| satmode        | n          | fn1           | 4096     |
| wet            | n          | sp            | -82.2    |
| TRANSMITTER    |            | wp            | 4081.5   |
| tn             | H1         | sp1           | -82.2    |
| sfrq           | 400.392    | wp1           | 4081.5   |
| tof            | 387.0      | rfl           | 802.1    |
| tpwr           | 55         | rfp           | 0        |
| pw             | 12.300     | rfl1          | 802.1    |
| GRADIENTS      |            | rfp1          | 0        |
| gzlvie         | 1000       | PLOT          |          |
| gtE            | 0.001000   | wc            | 140.0    |
| EDratio        | 1.000      | sc            | 5.0      |
| gstab          | 0.000500   | wc2           | 140.0    |
| DECOUPLER      |            | sc2           | 5.0      |
| dn             | C13        | vs            | 155      |
| dm             | nnn        | th            | 11       |
|                |            | a1            | av       |

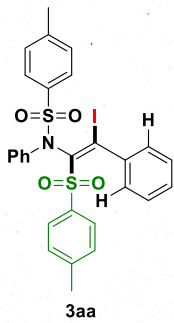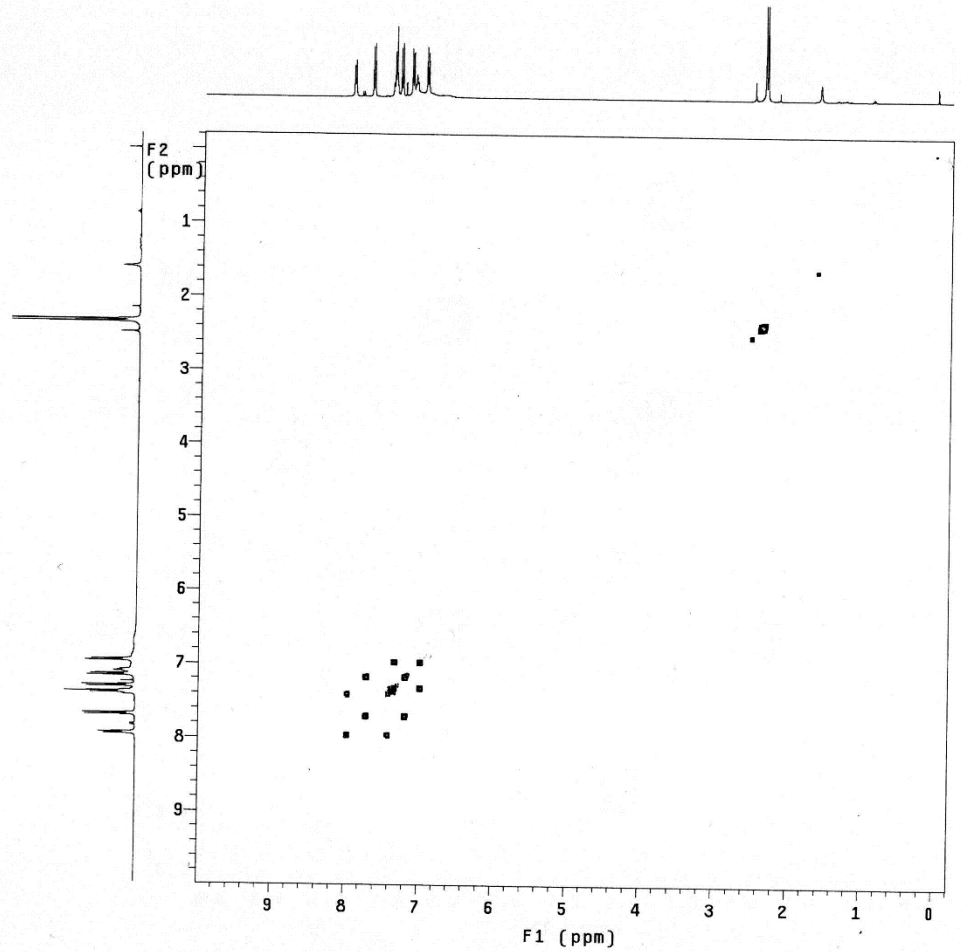

Pulse Sequence: gHMBC

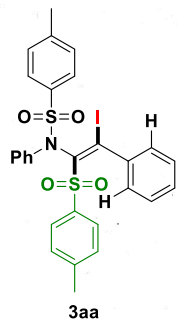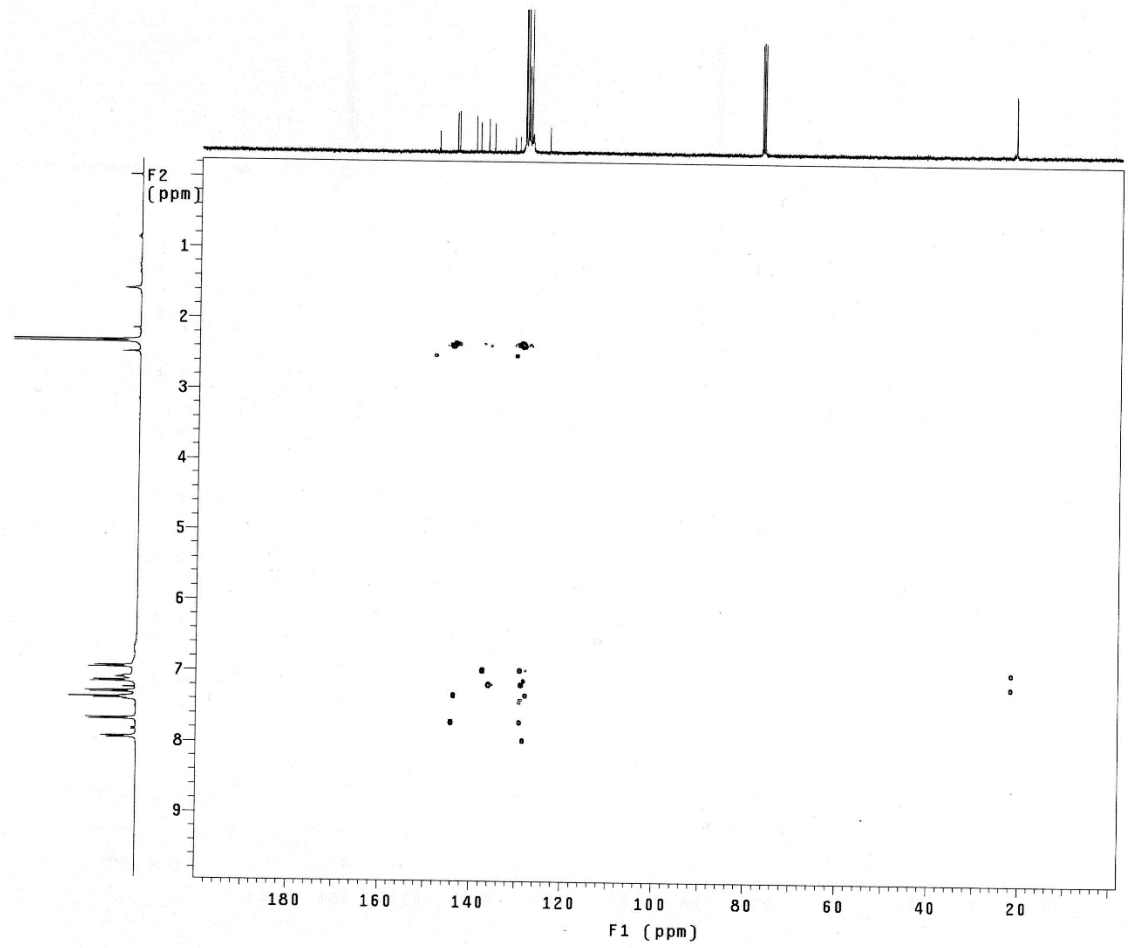

Pulse Sequence: gHSQC

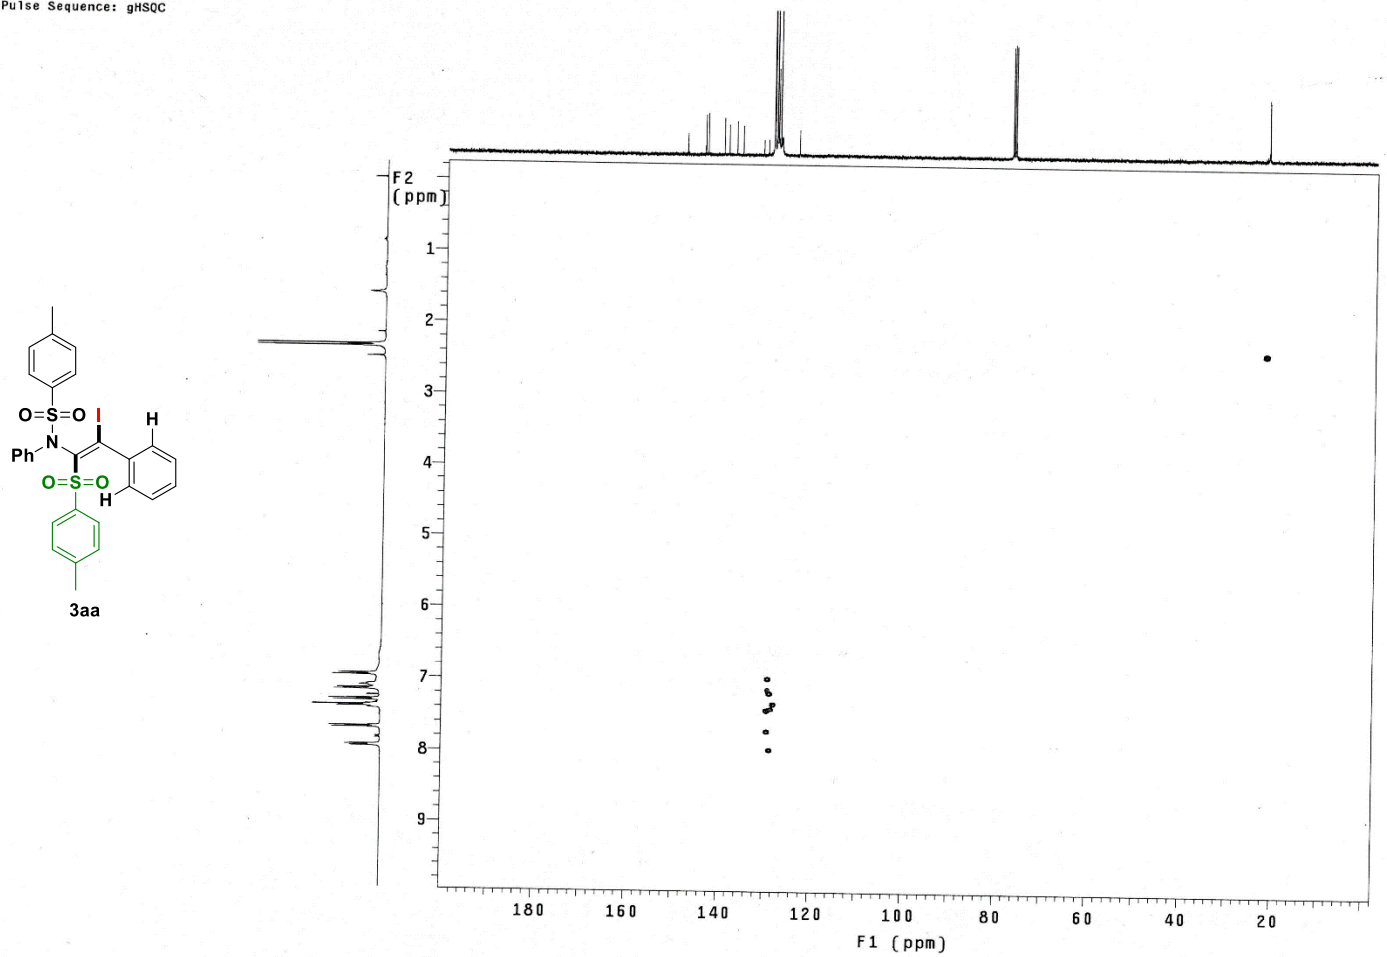



7.95  
7.93  
7.70  
7.68  
7.40  
7.38  
7.34  
7.32  
7.26  
7.17  
7.15  
6.97  
6.95  
6.81

2.50  
2.36  
2.34  
2.28

Solvent  $\text{CDCl}_3$   
Spectrometer Frequency 400.40  
Nucleus  $^1\text{H}$

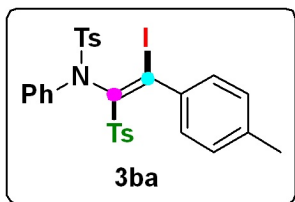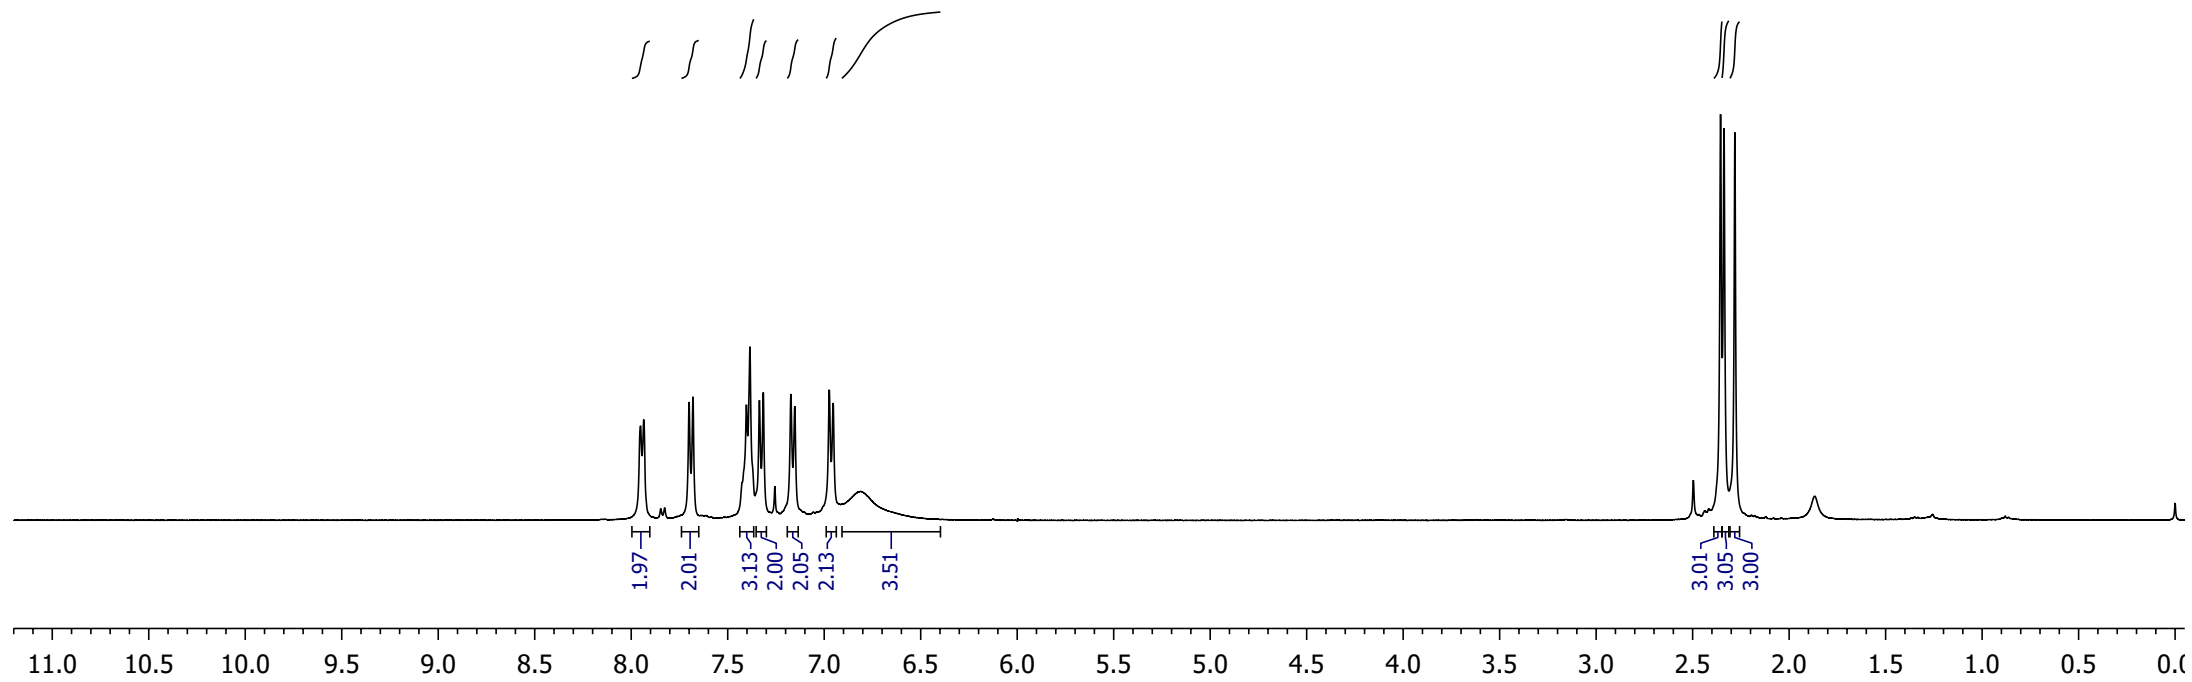

Solvent  $\text{CDCl}_3$   
Spectrometer Frequency 100.69  
Nucleus  $^{13}\text{C}$

147.7  
144.0  
143.5  
139.5  
139.0  
137.3  
137.2  
136.0  
131.4  
130.3  
129.2  
129.1  
128.8  
128.6  
128.6  
128.3  
127.9  
124.2

77.3  
77.0  
76.7

21.6  
21.5  
21.3

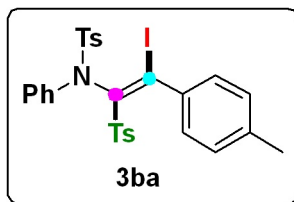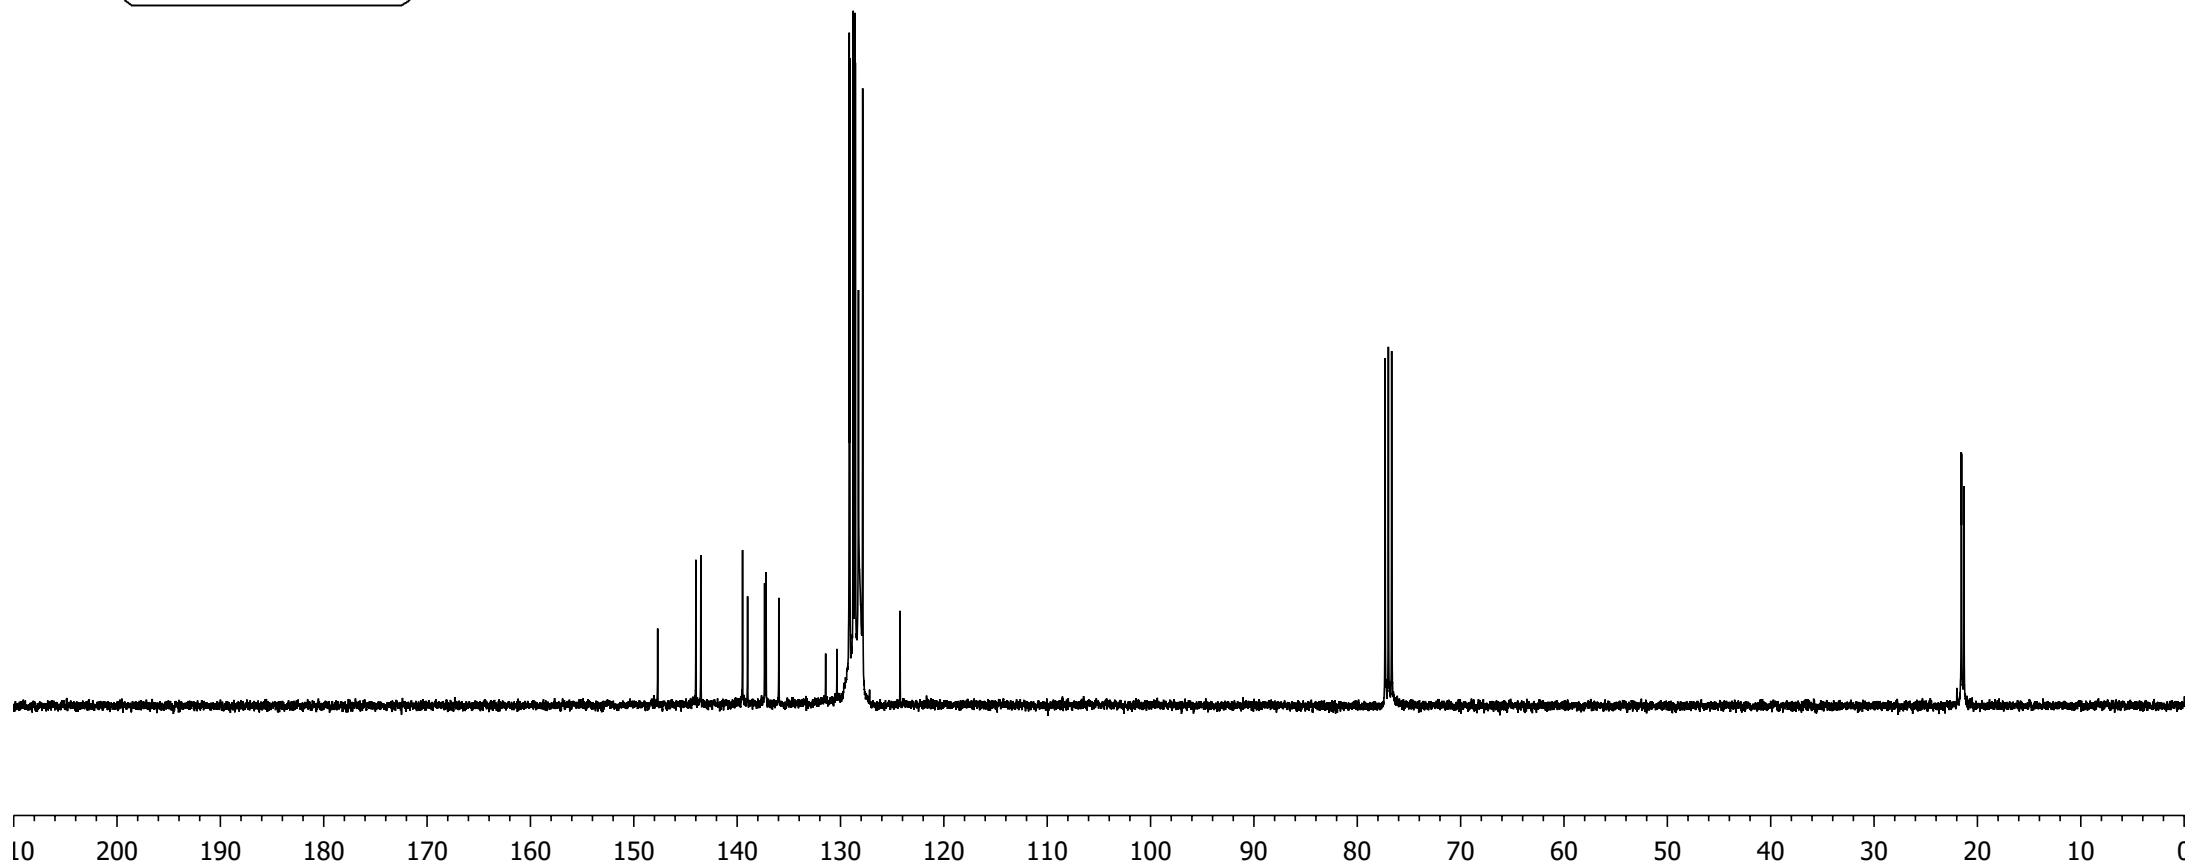

7.97  
7.96  
7.94  
7.94  
7.69  
7.67  
7.43  
7.43  
7.42  
7.41  
7.39  
7.38  
7.35  
7.33  
7.26  
7.17  
7.15  
6.97  
6.95  
6.83

2.59  
2.57  
2.55  
2.54  
2.36  
2.33

1.59  
1.23  
1.22  
1.20

0.00

Solvent  $\text{CDCl}_3$   
Spectrometer Frequency 400.28  
Nucleus  $^1\text{H}$

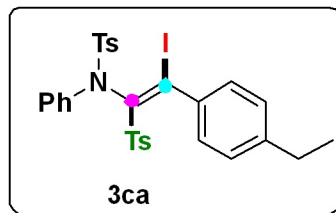

Handwritten annotations above the aromatic region of the spectrum, consisting of several vertical lines and a curved line, likely indicating peak assignments or integration regions.

Handwritten annotations above the aliphatic region of the spectrum, consisting of several vertical lines, likely indicating peak assignments or integration regions.

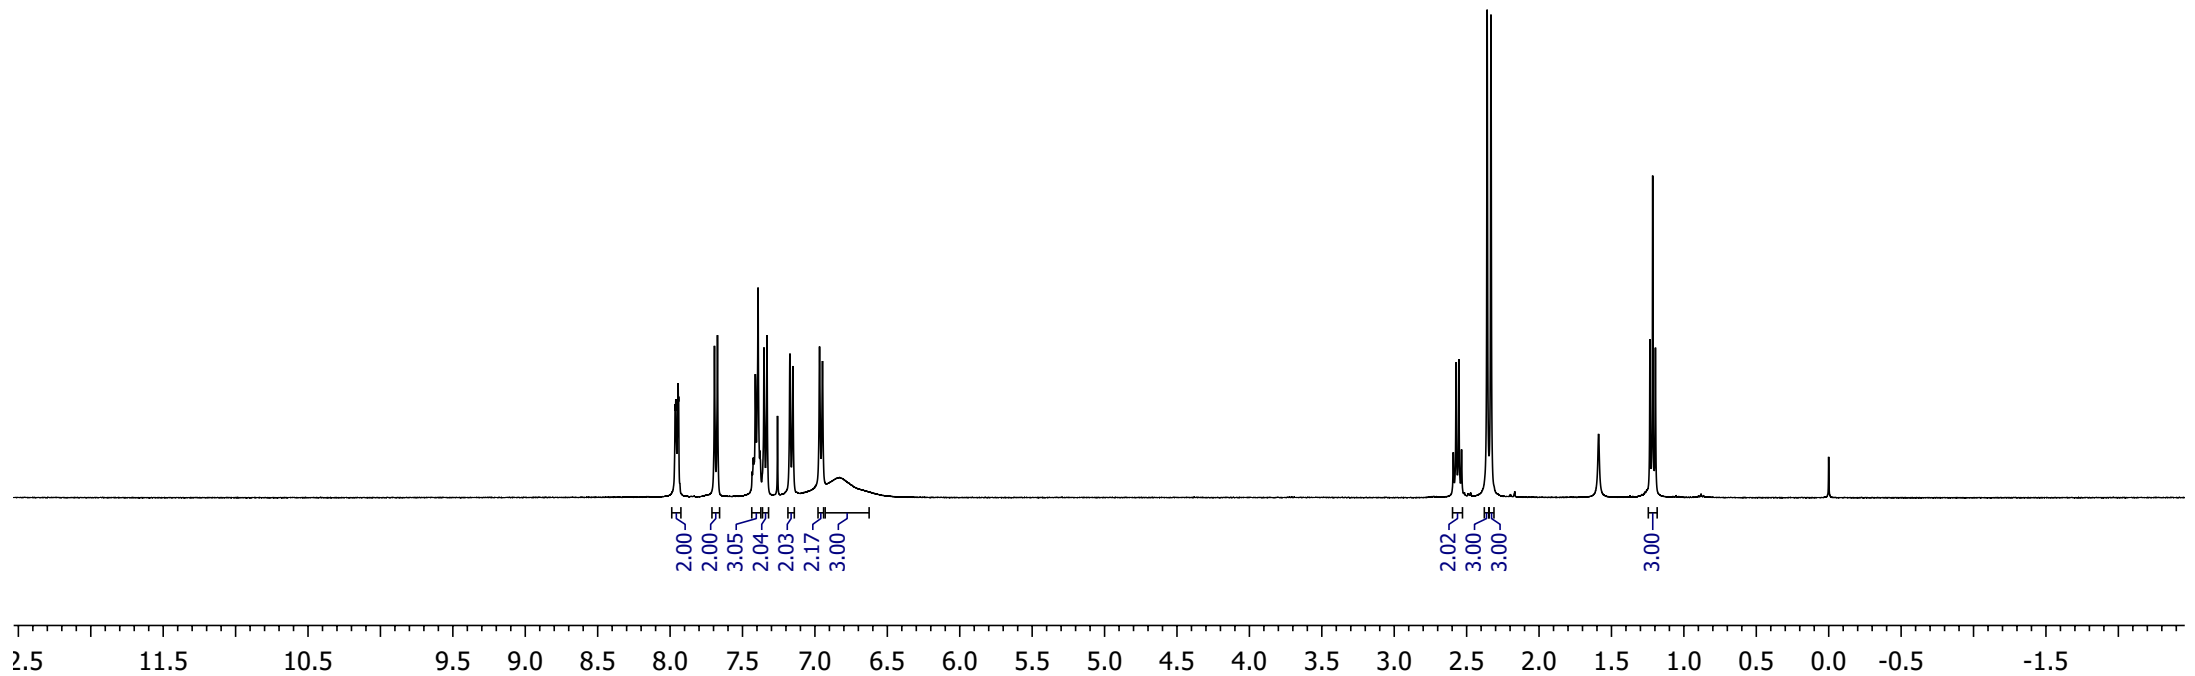

147.6  
145.8  
144.0  
143.4  
139.0  
137.4  
136.0  
129.2  
129.1  
128.9  
128.6  
128.6  
128.3  
127.8  
126.9  
124.3

77.3  
77.0  
76.7

28.7

21.6  
21.5

15.6

Solvent  $\text{CDCl}_3$   
Spectrometer Frequency 100.66  
Nucleus  $^{13}\text{C}$

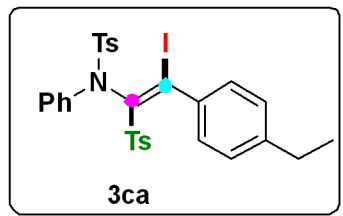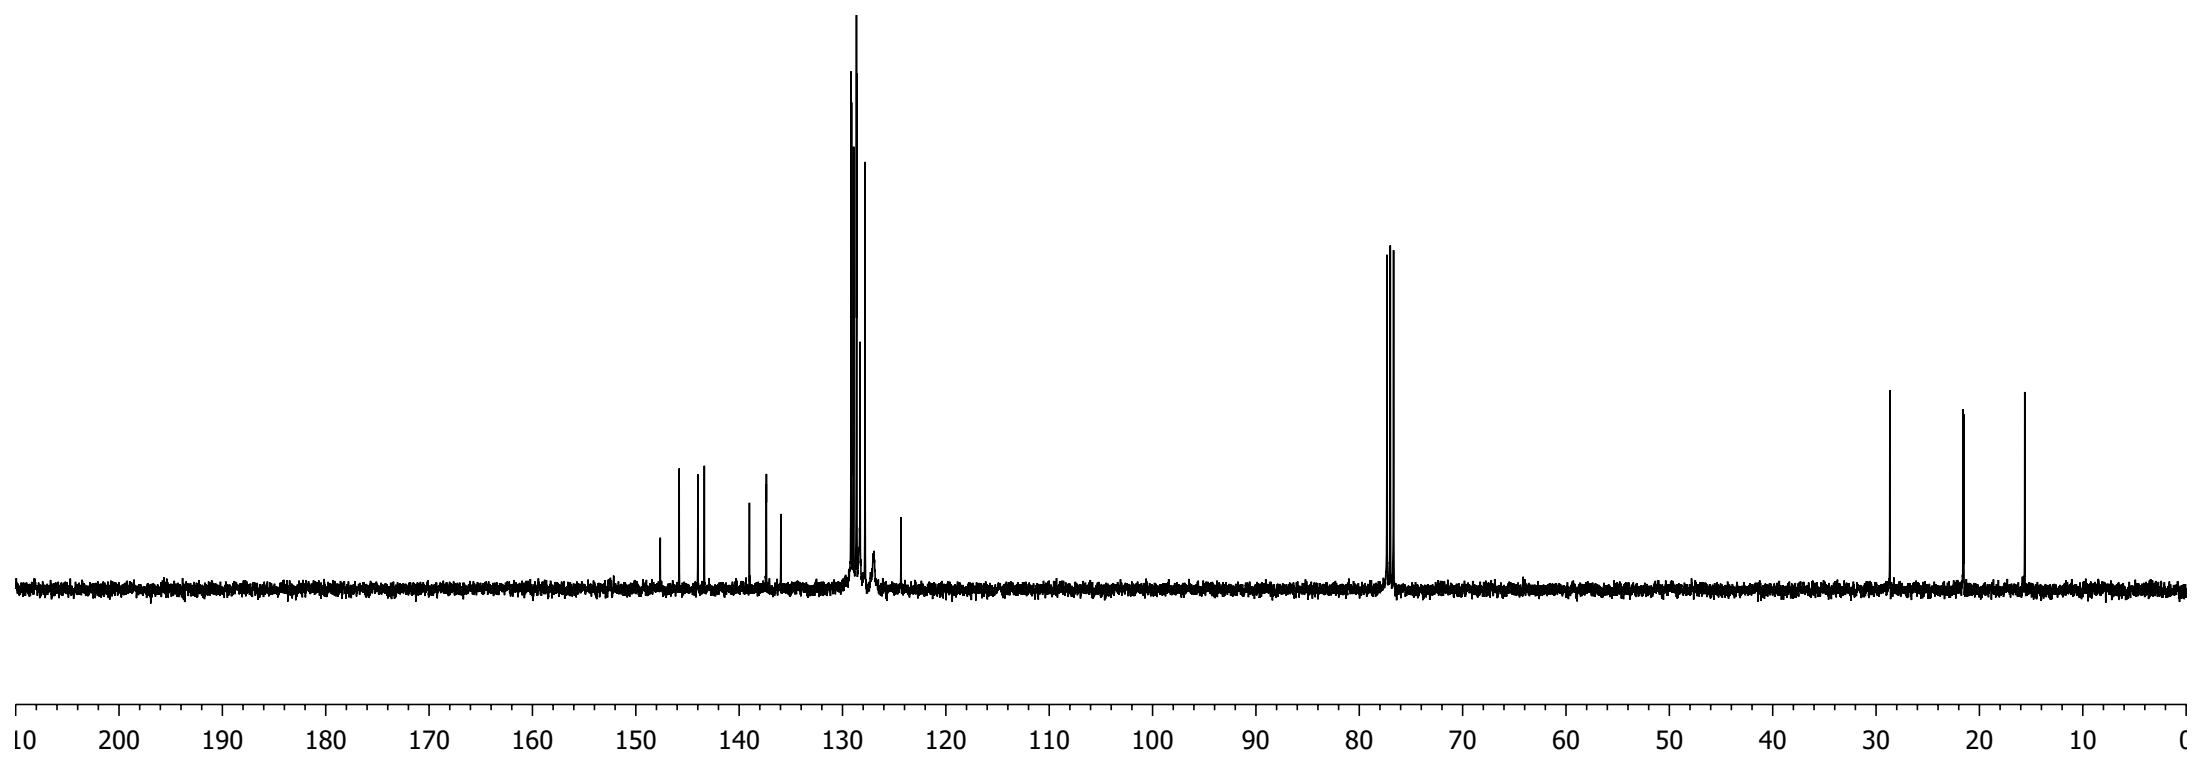

M0425  
 LJJ  
 8.00  
 7.925  
 7.974  
 7.81  
 7.79  
 7.69  
 7.67  
 7.45  
 7.43  
 7.41  
 7.39  
 7.38  
 7.36  
 7.34  
 7.31  
 7.29  
 7.27  
 7.26  
 7.21  
 7.16  
 7.13  
 7.10  
 7.10  
 7.06  
 7.06  
 7.05  
 6.99  
 6.97  
 6.92  
 6.83  
 6.82  
 6.81  
 6.80  
 6.52  
 6.49  
 6.26  
 6.24

3.43  
3.40

2.40  
2.37  
2.35  
2.32

-0.00

Solvent  $\text{CDCl}_3$   
 Spectrometer Frequency 400.40  
 Nucleus  $^1\text{H}$

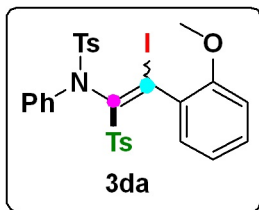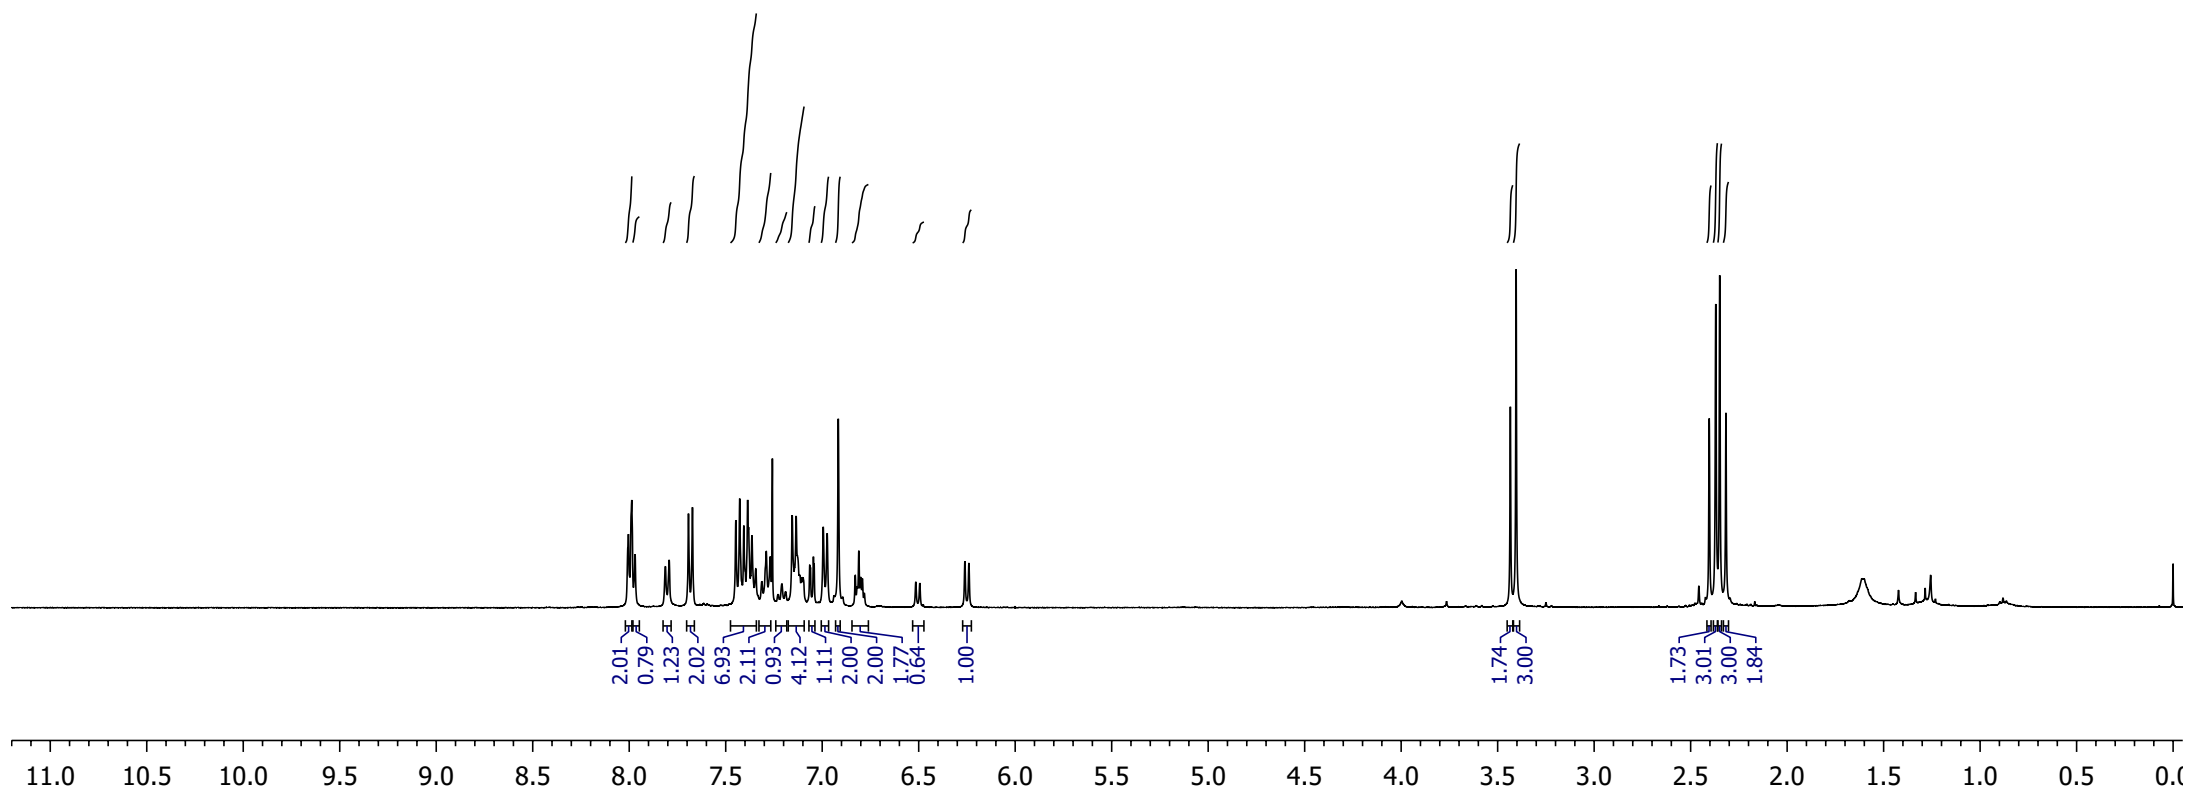

M0425-5  
LJ3-15

S38

Solvent  $\text{CDCl}_3$   
Spectrometer Frequency 100.69  
Nucleus  $^{13}\text{C}$

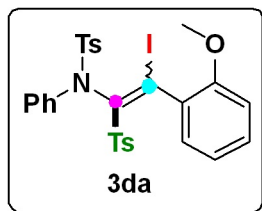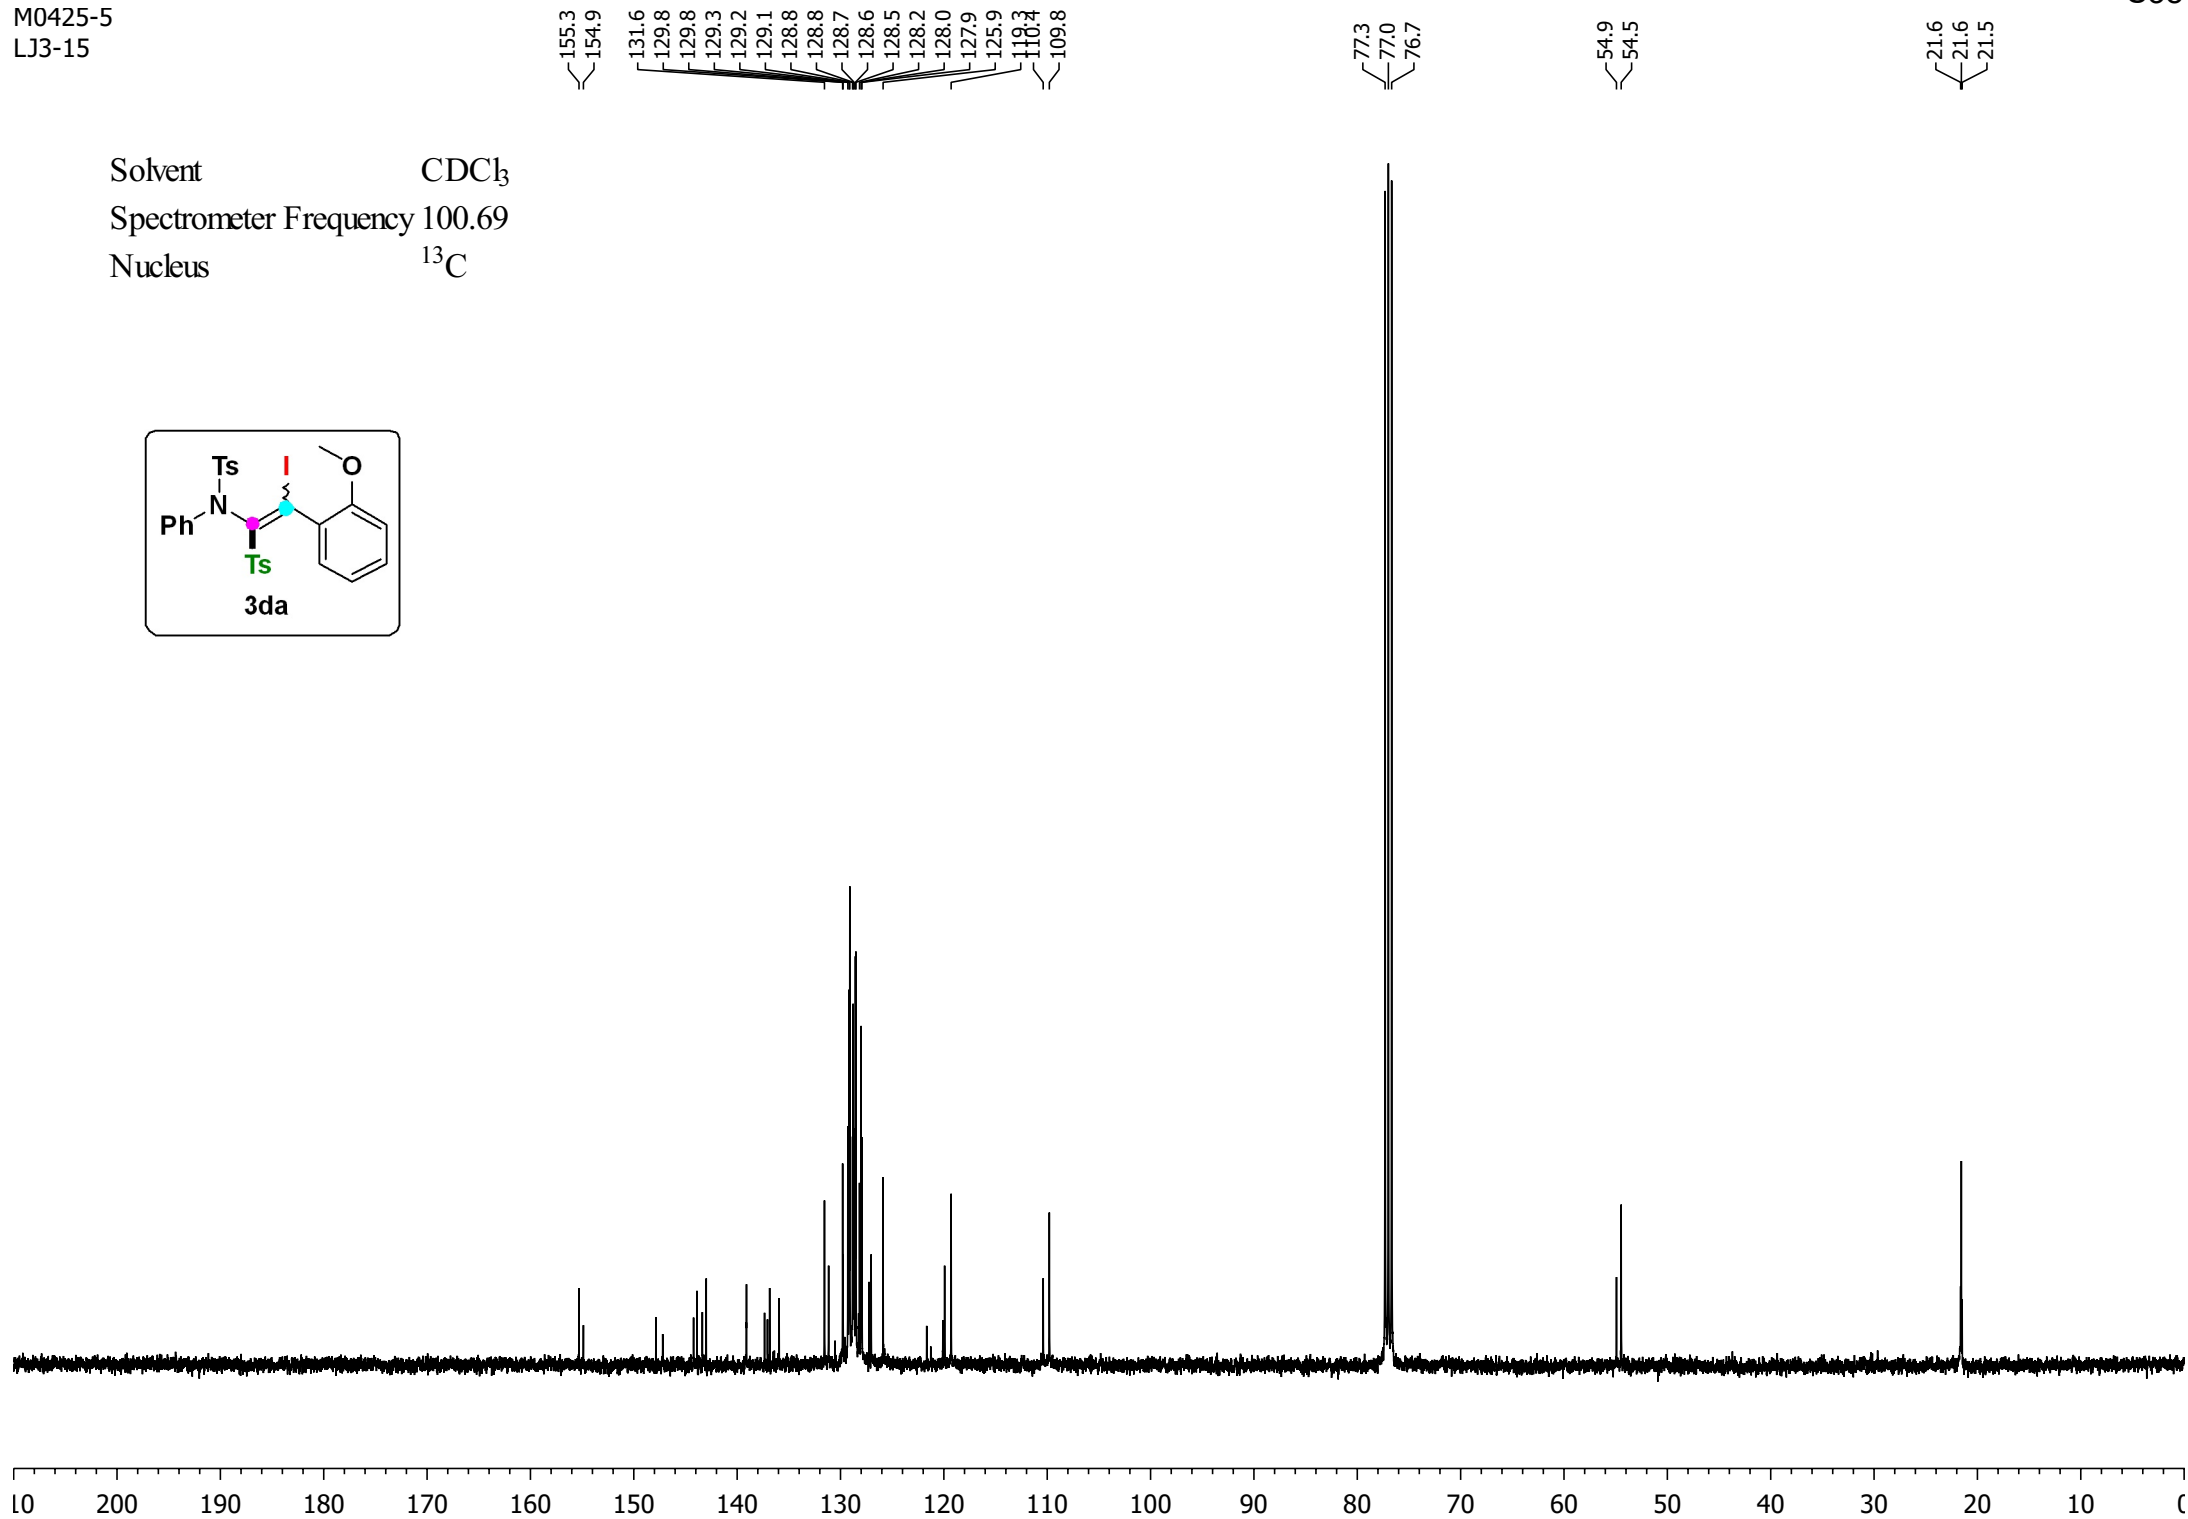

M0425-7  
LJ3-19(3-Cl)

7.94  
7.92  
7.69  
7.67  
7.43  
7.43  
7.42  
7.42  
7.41  
7.41  
7.40  
7.40  
7.39  
7.39  
7.38  
7.36  
7.26  
7.18  
7.16  
7.06  
7.04  
6.66

2.37  
2.36

1.58

S39  
-0.00

Solvent  $\text{CDCl}_3$   
Spectrometer Frequency 400.40  
Nucleus  $^1\text{H}$

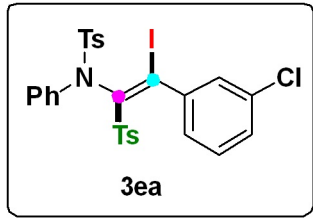

Handwritten annotations in the spectrum area, consisting of several vertical lines and a horizontal line, likely indicating specific peaks or regions of interest.

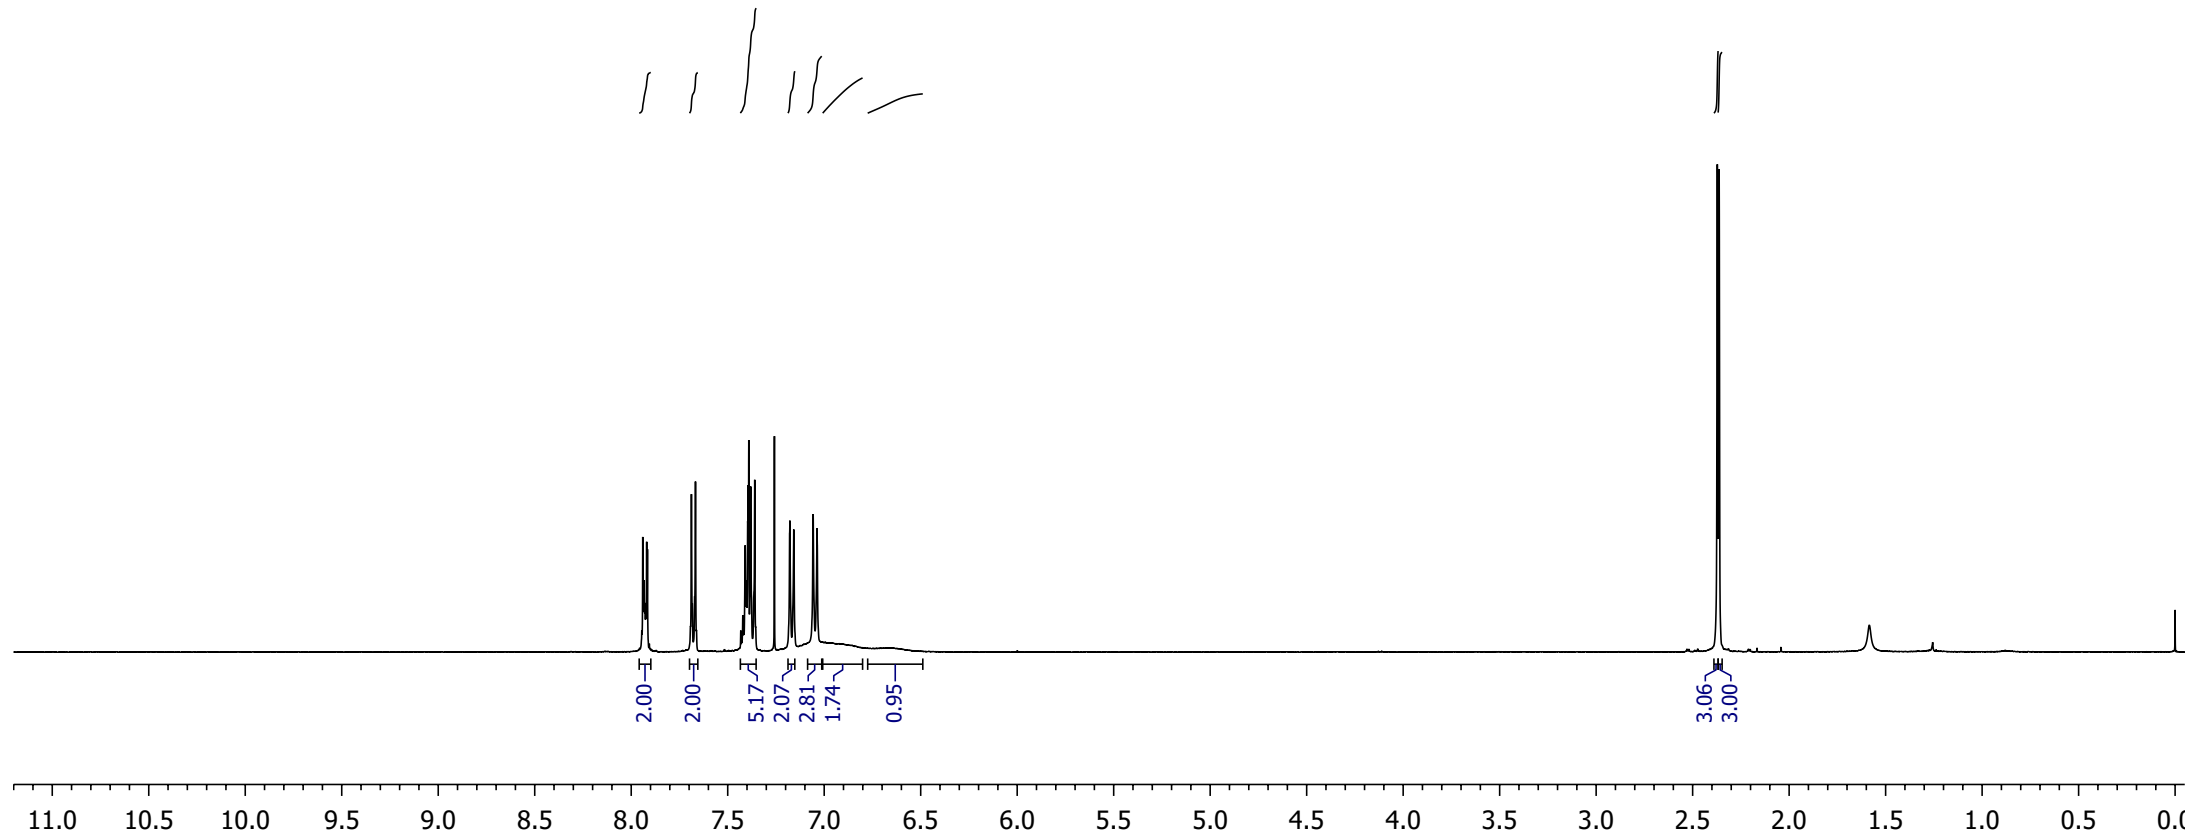

148.7  
144.2  
144.0  
138.4  
137.2  
135.8  
135.4  
129.1  
129.1  
128.7  
121.7

77.3  
77.0  
76.7

21.6

Solvent  $\text{CDCl}_3$   
Spectrometer Frequency 100.69  
Nucleus  $^{13}\text{C}$

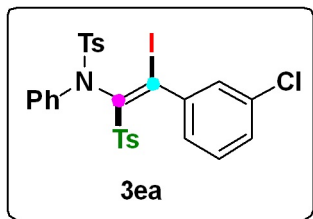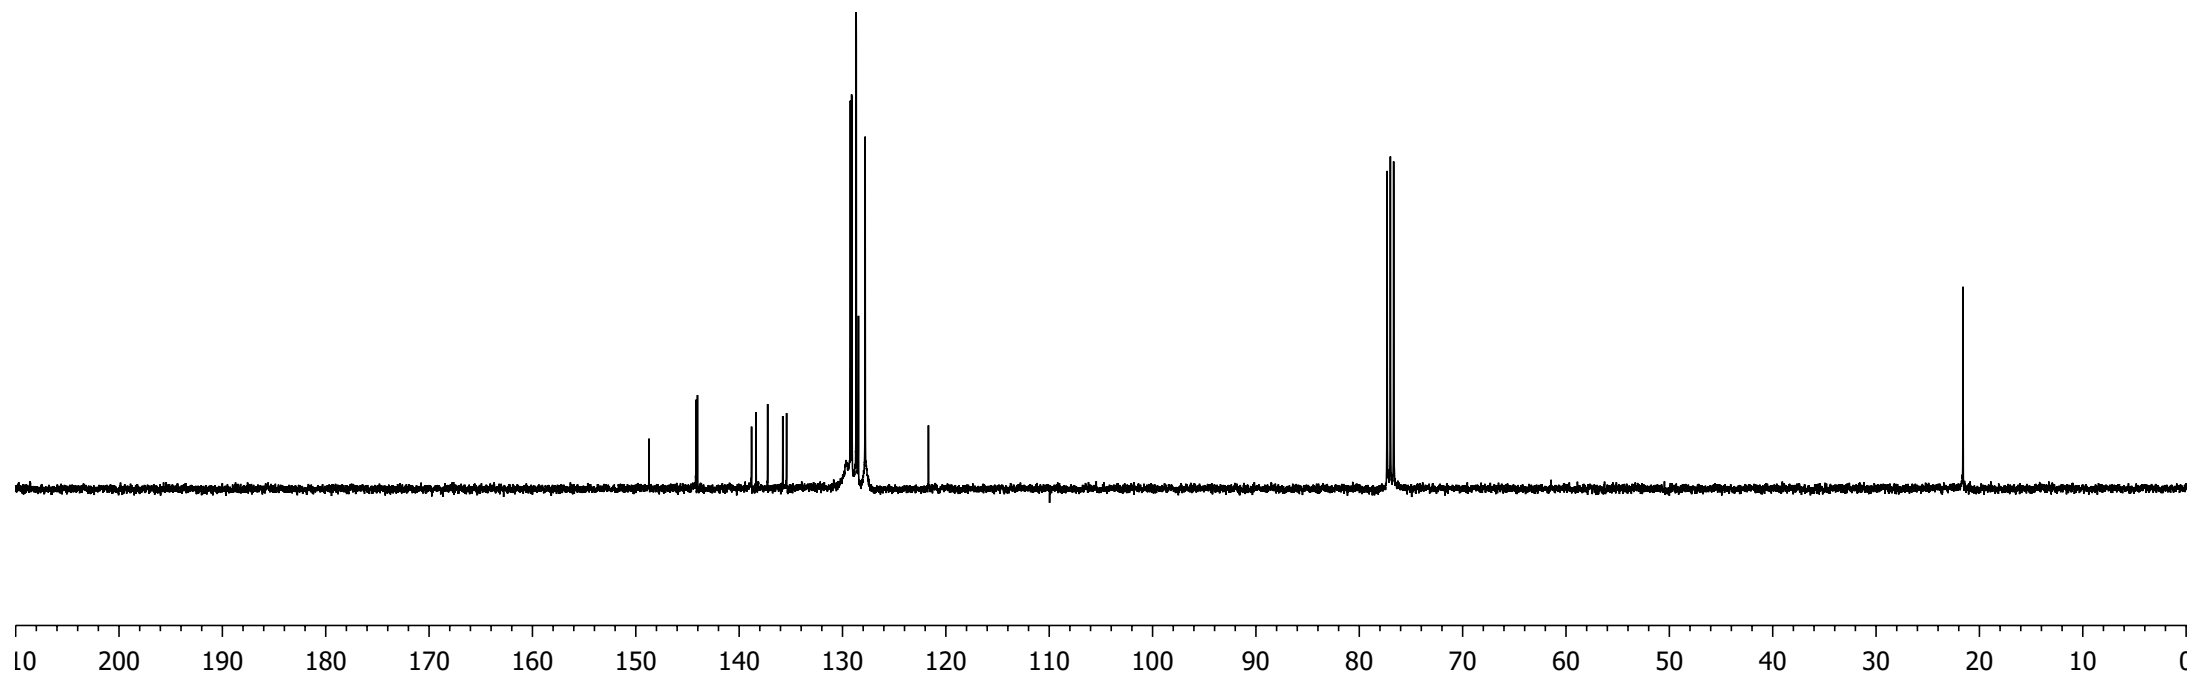



7.84  
7.82  
7.69  
7.67  
7.31  
7.21  
7.19  
7.18  
6.97

2.39  
2.37  
2.33

Solvent  $\text{CDCl}_3$   
Spectrometer Frequency 400.40  
Nucleus  $^1\text{H}$

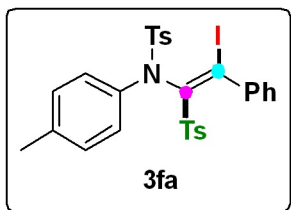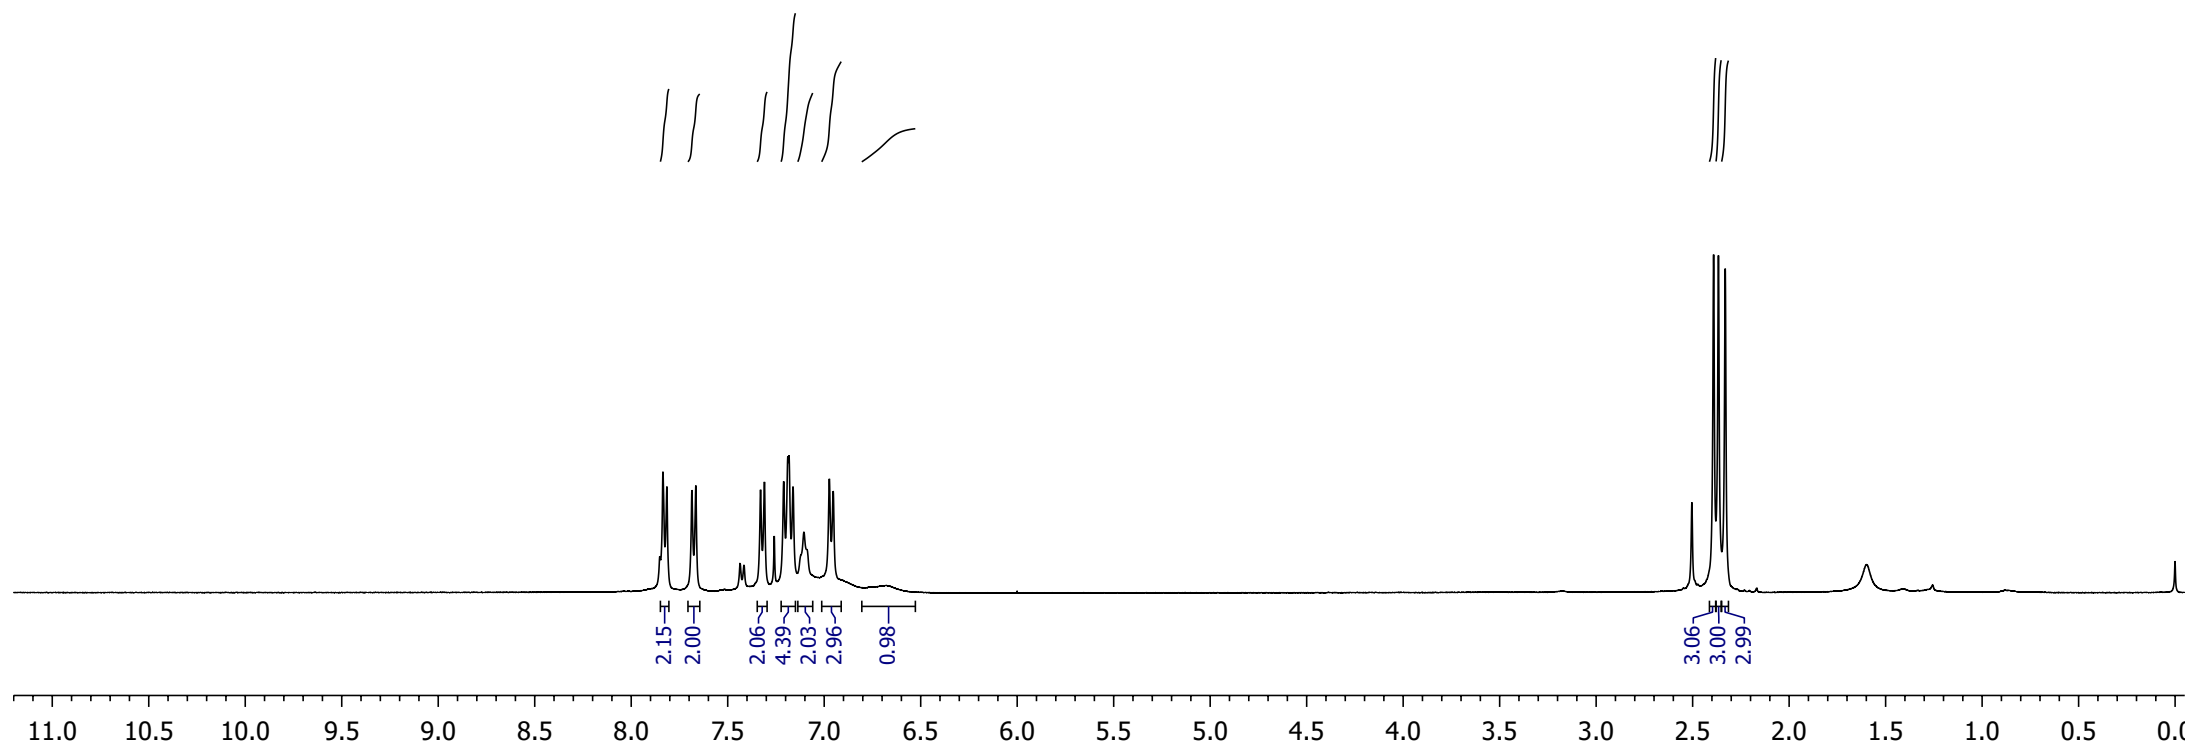

Solvent  $\text{CDCl}_3$   
Spectrometer Frequency 100.69  
Nucleus  $^{13}\text{C}$

148.1  
143.9  
143.5  
140.0  
138.5  
137.4  
136.3  
136.0  
131.5  
130.4  
129.8  
129.1  
129.0  
128.8  
128.6  
127.8  
123.4

77.3  
77.0  
76.7

21.6  
21.5  
21.2

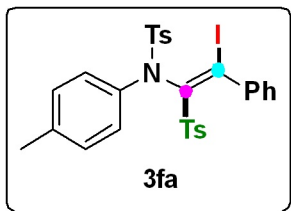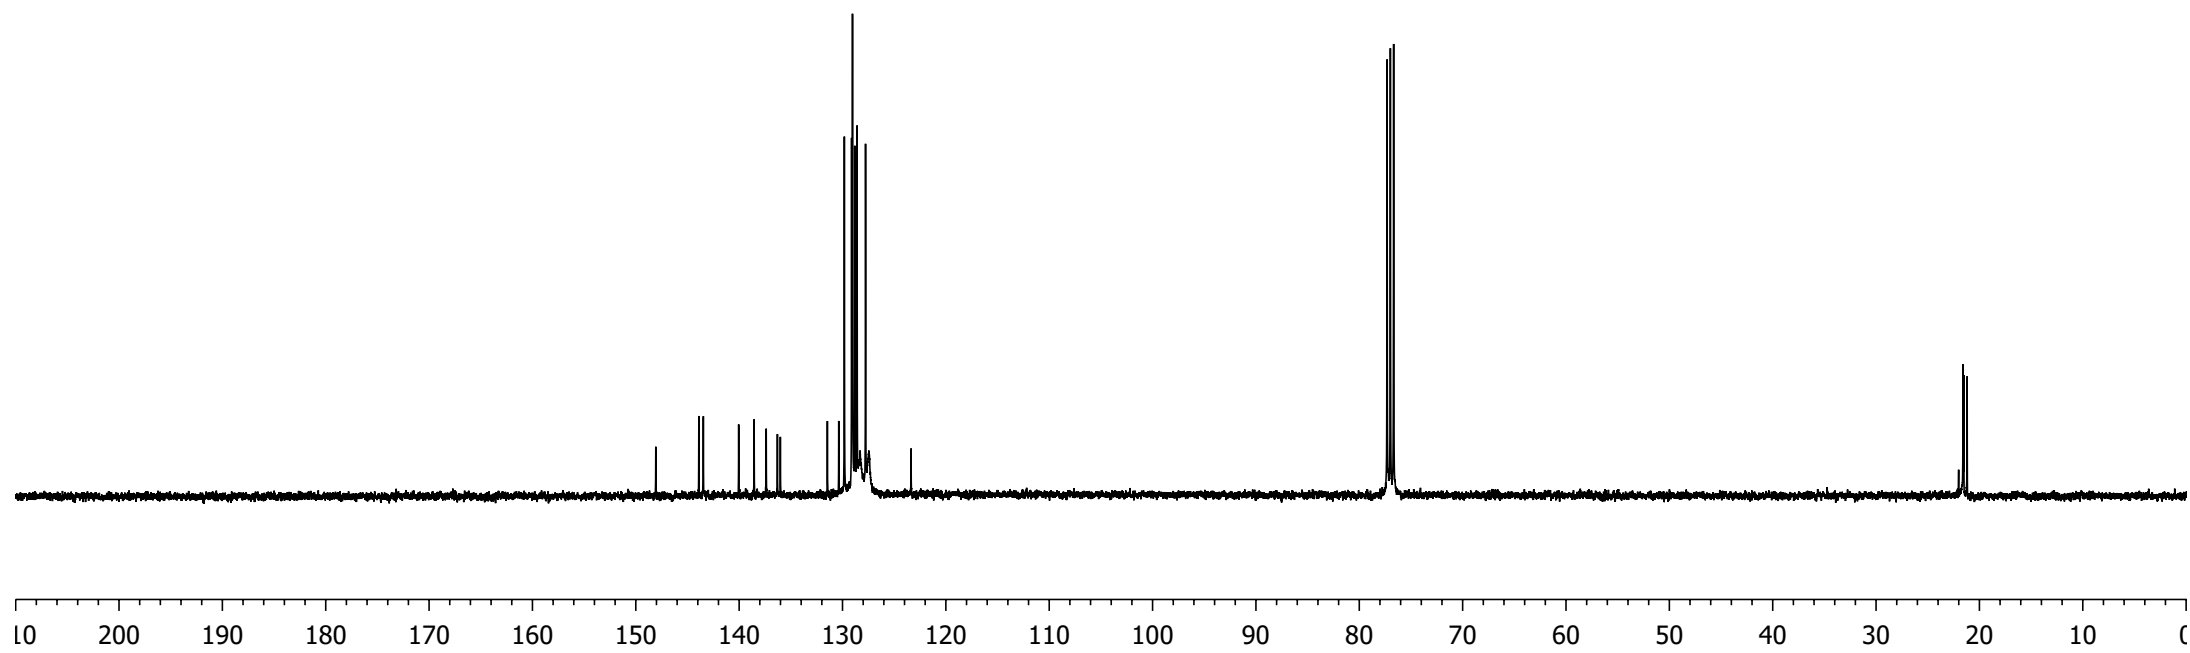

M0036-7  
LJ3-6

7.85  
7.83  
7.68  
7.66  
7.32  
7.30  
7.26  
7.23  
7.21  
7.18  
7.16  
7.11  
7.09  
6.97  
6.95  
6.70

2.72  
2.70  
2.69  
2.67  
2.37  
2.33

1.29  
1.28  
1.26

S43  
— 0.00

Solvent  $\text{CDCl}_3$   
Spectrometer Frequency 400.40  
Nucleus  $^1\text{H}$

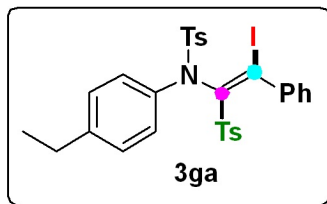

Handwritten annotations above the aromatic region of the spectrum, consisting of several vertical lines and a small curve, likely indicating peak assignments or integration regions.

Handwritten annotations above the aliphatic region of the spectrum, consisting of several vertical lines and a small curve, likely indicating peak assignments or integration regions.

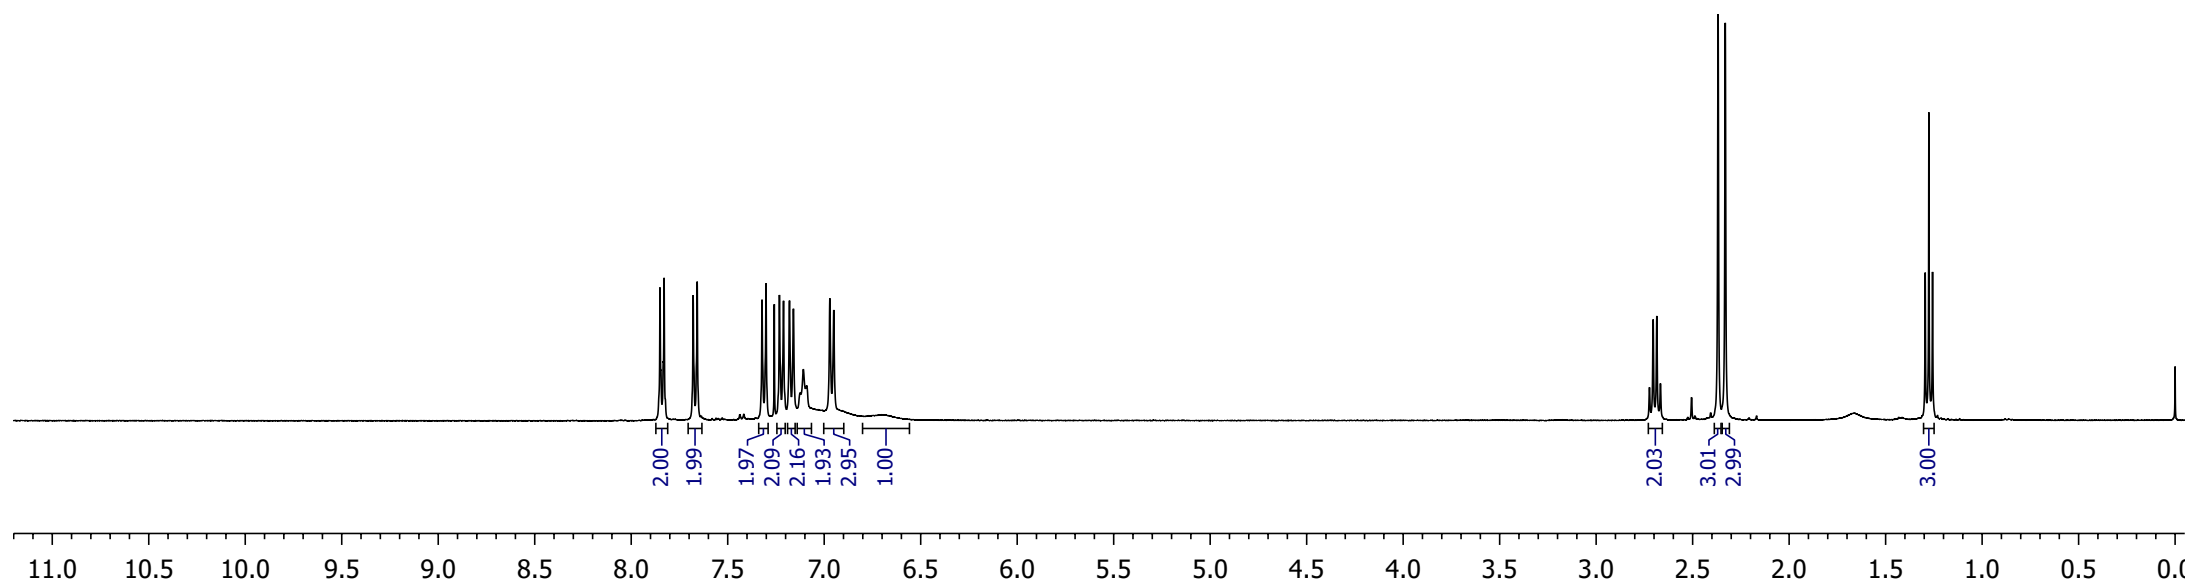

148.0  
144.7  
143.9  
143.5  
140.1  
137.4  
136.4  
136.1  
129.1  
129.0  
128.9  
128.6  
127.8  
123.4

77.3  
77.0  
76.7

28.5  
21.6  
21.5  
15.3

Solvent  $\text{CDCl}_3$   
Spectrometer Frequency 100.69  
Nucleus  $^{13}\text{C}$

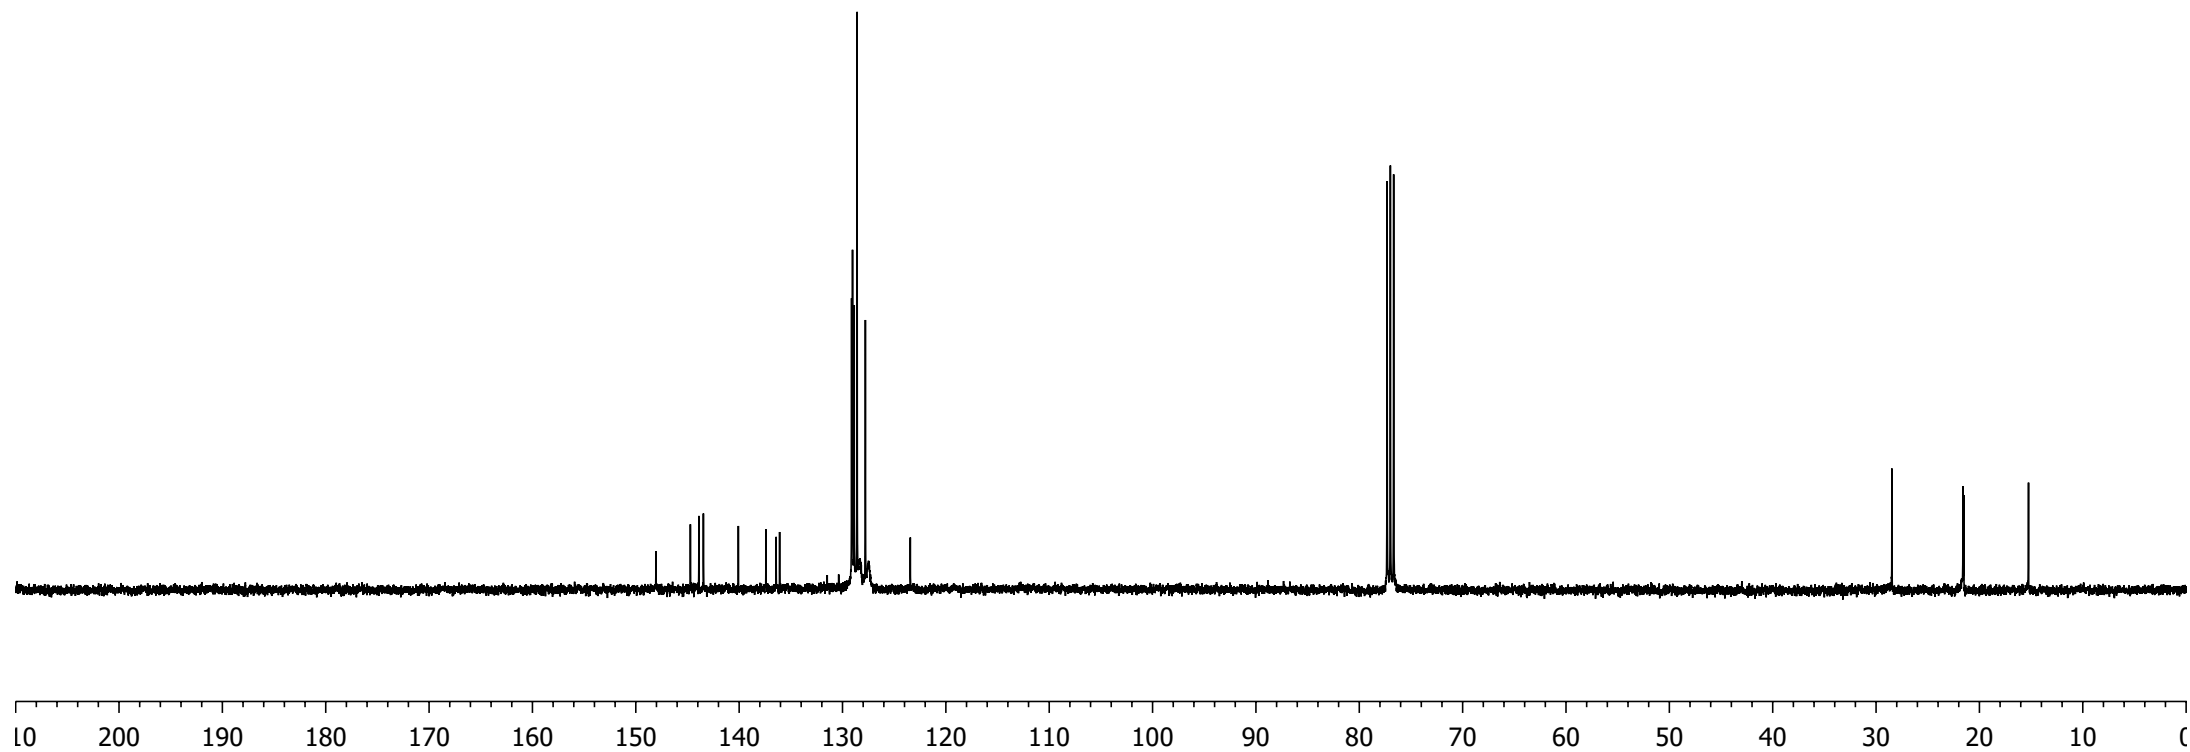

M0150-13  
LJ3-1

8.10  
8.08  
7.57  
7.56  
7.37  
7.37  
7.36  
7.26  
7.19  
7.17  
6.94  
6.92

5.08  
5.04  
4.68  
4.65

2.46  
2.31

1.60

S45  
-0.00

Solvent  $\text{CDCl}_3$   
Spectrometer Frequency 400.40  
Nucleus  $^1\text{H}$

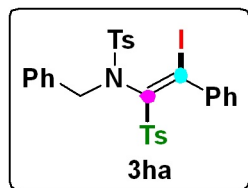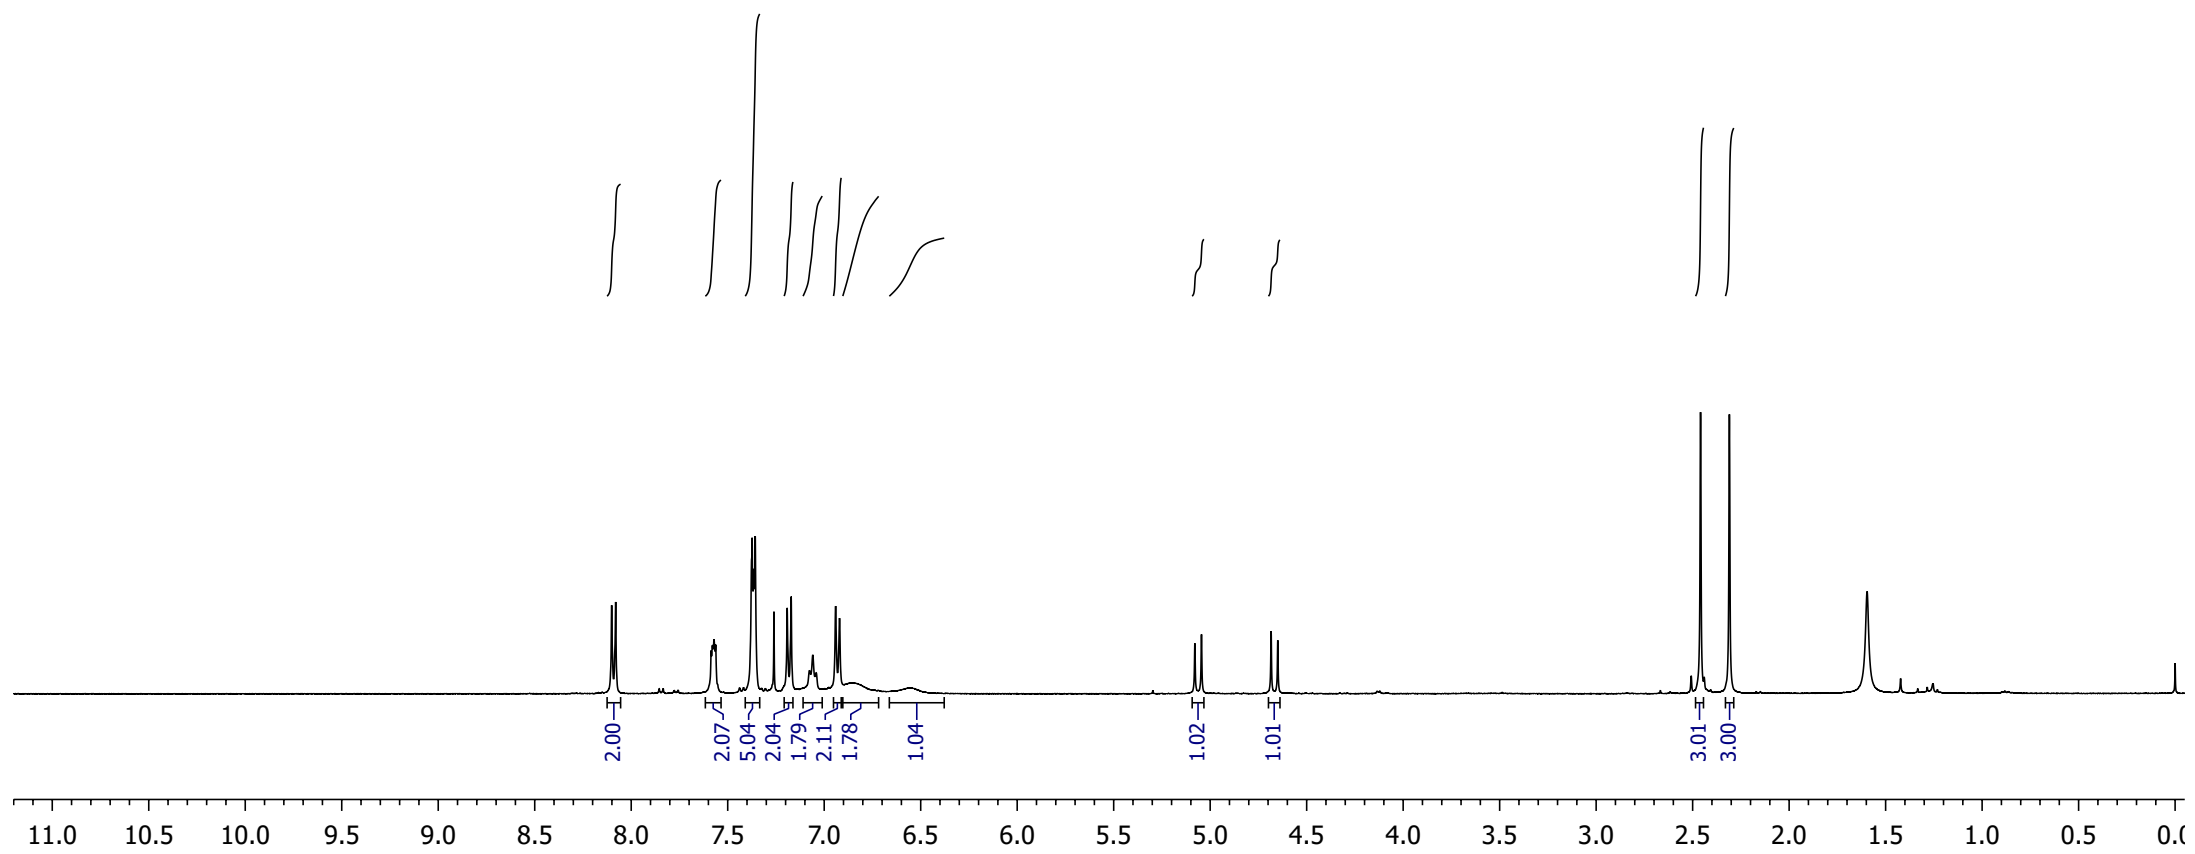

M0150-14  
LJ3-1

S46

Solvent  $\text{CDCl}_3$   
Spectrometer Frequency 100.69  
Nucleus  $^{13}\text{C}$

145.3  
144.2  
143.4  
140.3  
137.6  
136.6  
133.2  
131.5  
129.2  
129.2  
129.0  
128.9  
128.7  
128.2  
127.5  
125.3

77.3  
77.0  
76.7

54.0

21.7  
21.5

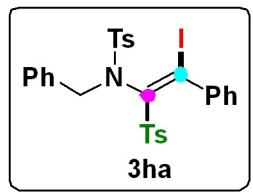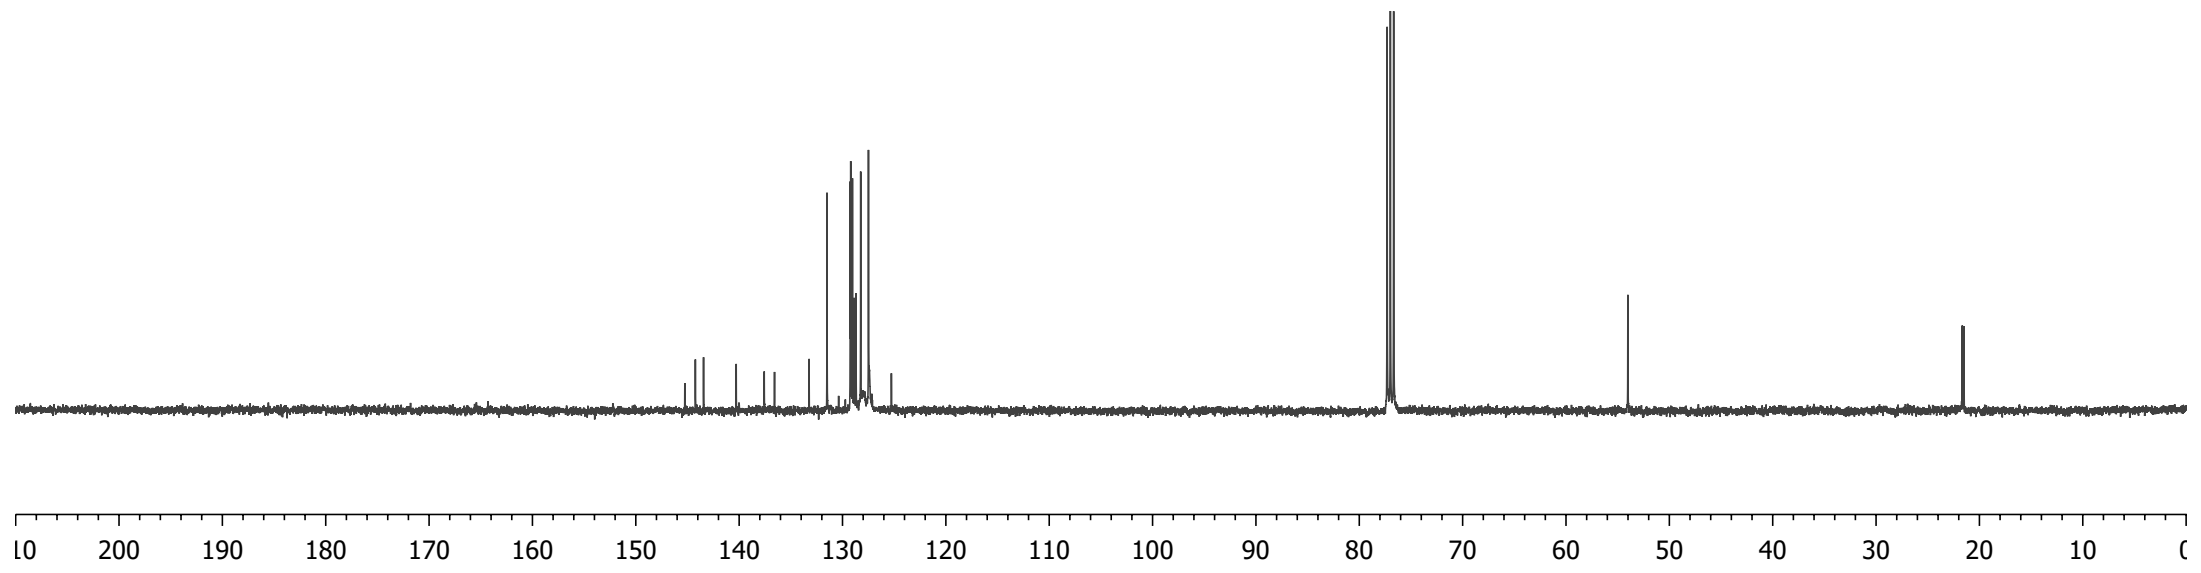

M0394-7  
LJ3-14

8.03  
8.01  
7.85  
7.83  
7.43  
7.41  
7.34  
7.32  
7.26  
7.24  
7.22  
7.15  
7.13  
7.12  
7.03  
6.97  
6.95

3.76  
3.74  
3.73  
3.72  
3.71  
3.70  
3.68  
3.64  
3.63  
3.61  
3.61  
3.60  
3.58  
3.57

2.50  
2.43  
2.32

1.98  
1.97  
1.96  
1.89  
1.88  
1.86  
1.85  
1.85  
0.97  
0.96

S47  
0.00

Solvent  $\text{CDCl}_3$   
Spectrometer Frequency 400.40  
Nucleus  $^1\text{H}$

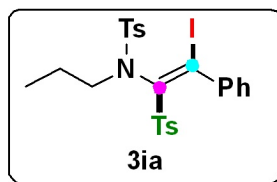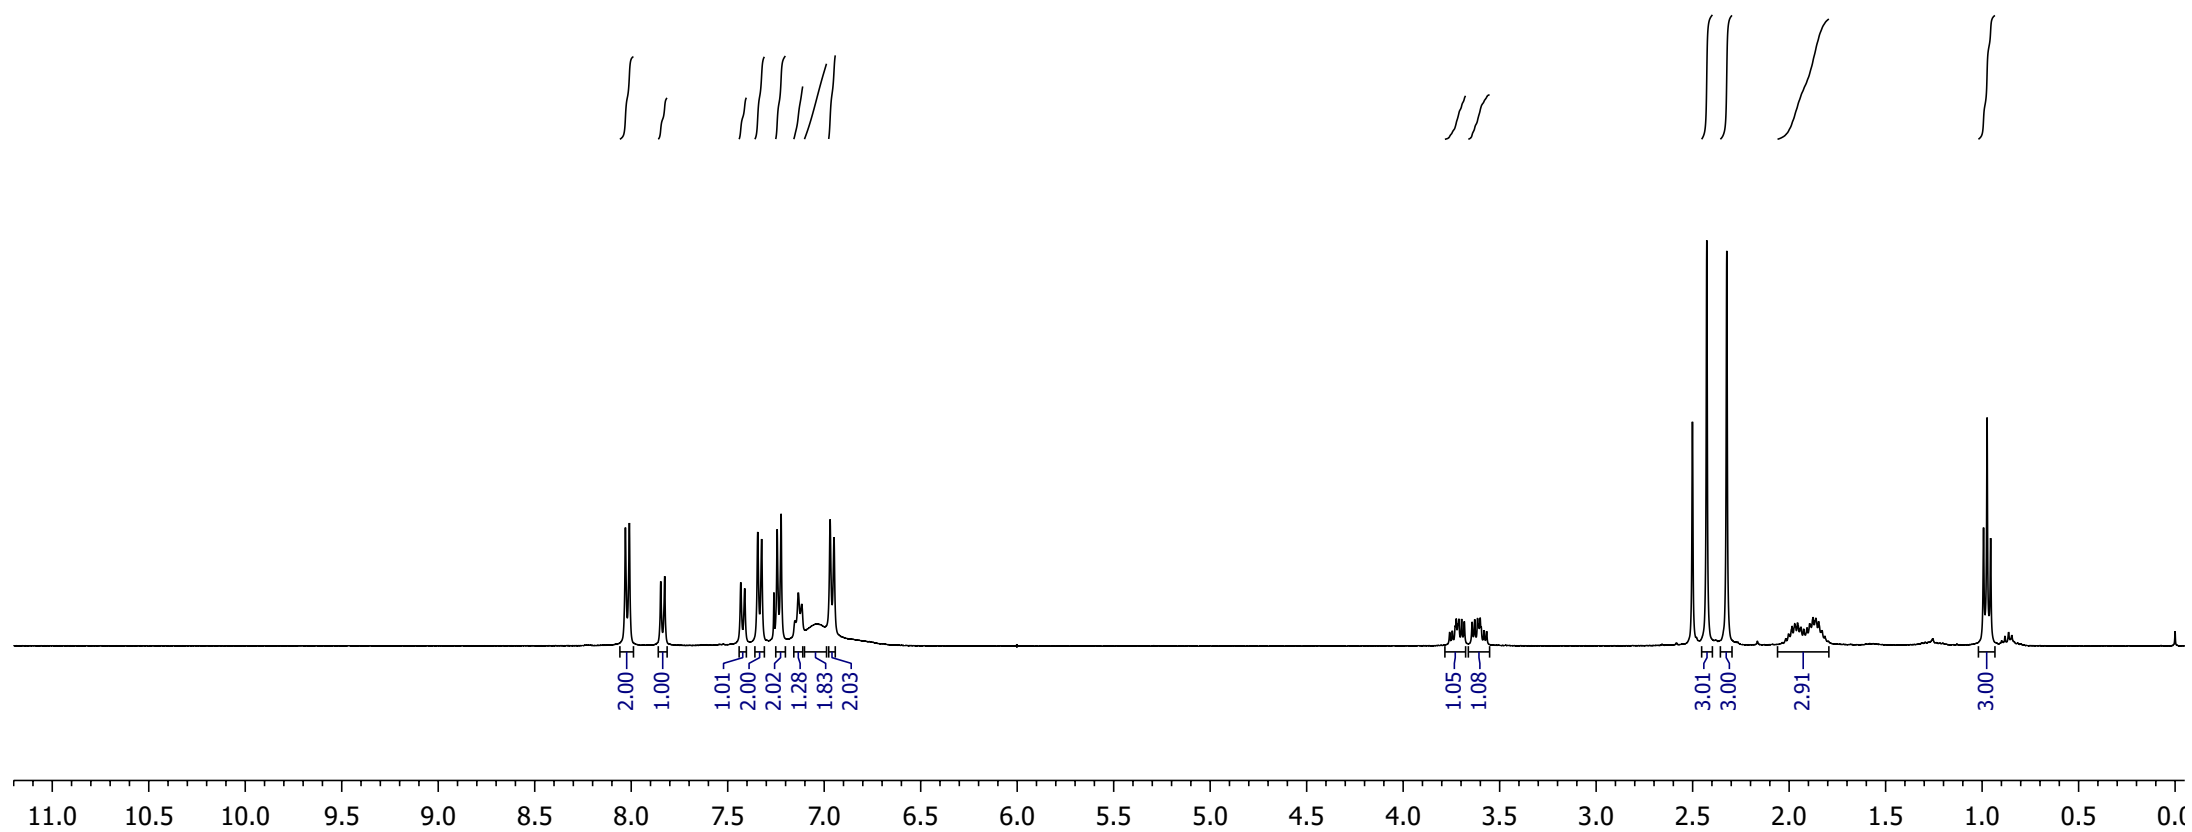

M0394-8  
LJ3-14

S48

Solvent  $\text{CDCl}_3$   
Spectrometer Frequency 100.69  
Nucleus  $^{13}\text{C}$

148.1  
146.5  
144.0  
143.5  
140.2  
137.3  
136.5  
131.4  
130.3  
129.1  
129.0  
129.0  
128.2  
127.9  
127.6  
123.8

77.3  
77.0  
76.7

52.3

22.0  
21.7  
21.6  
21.5

11.5

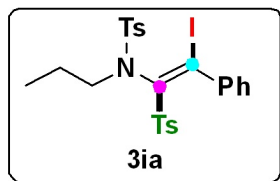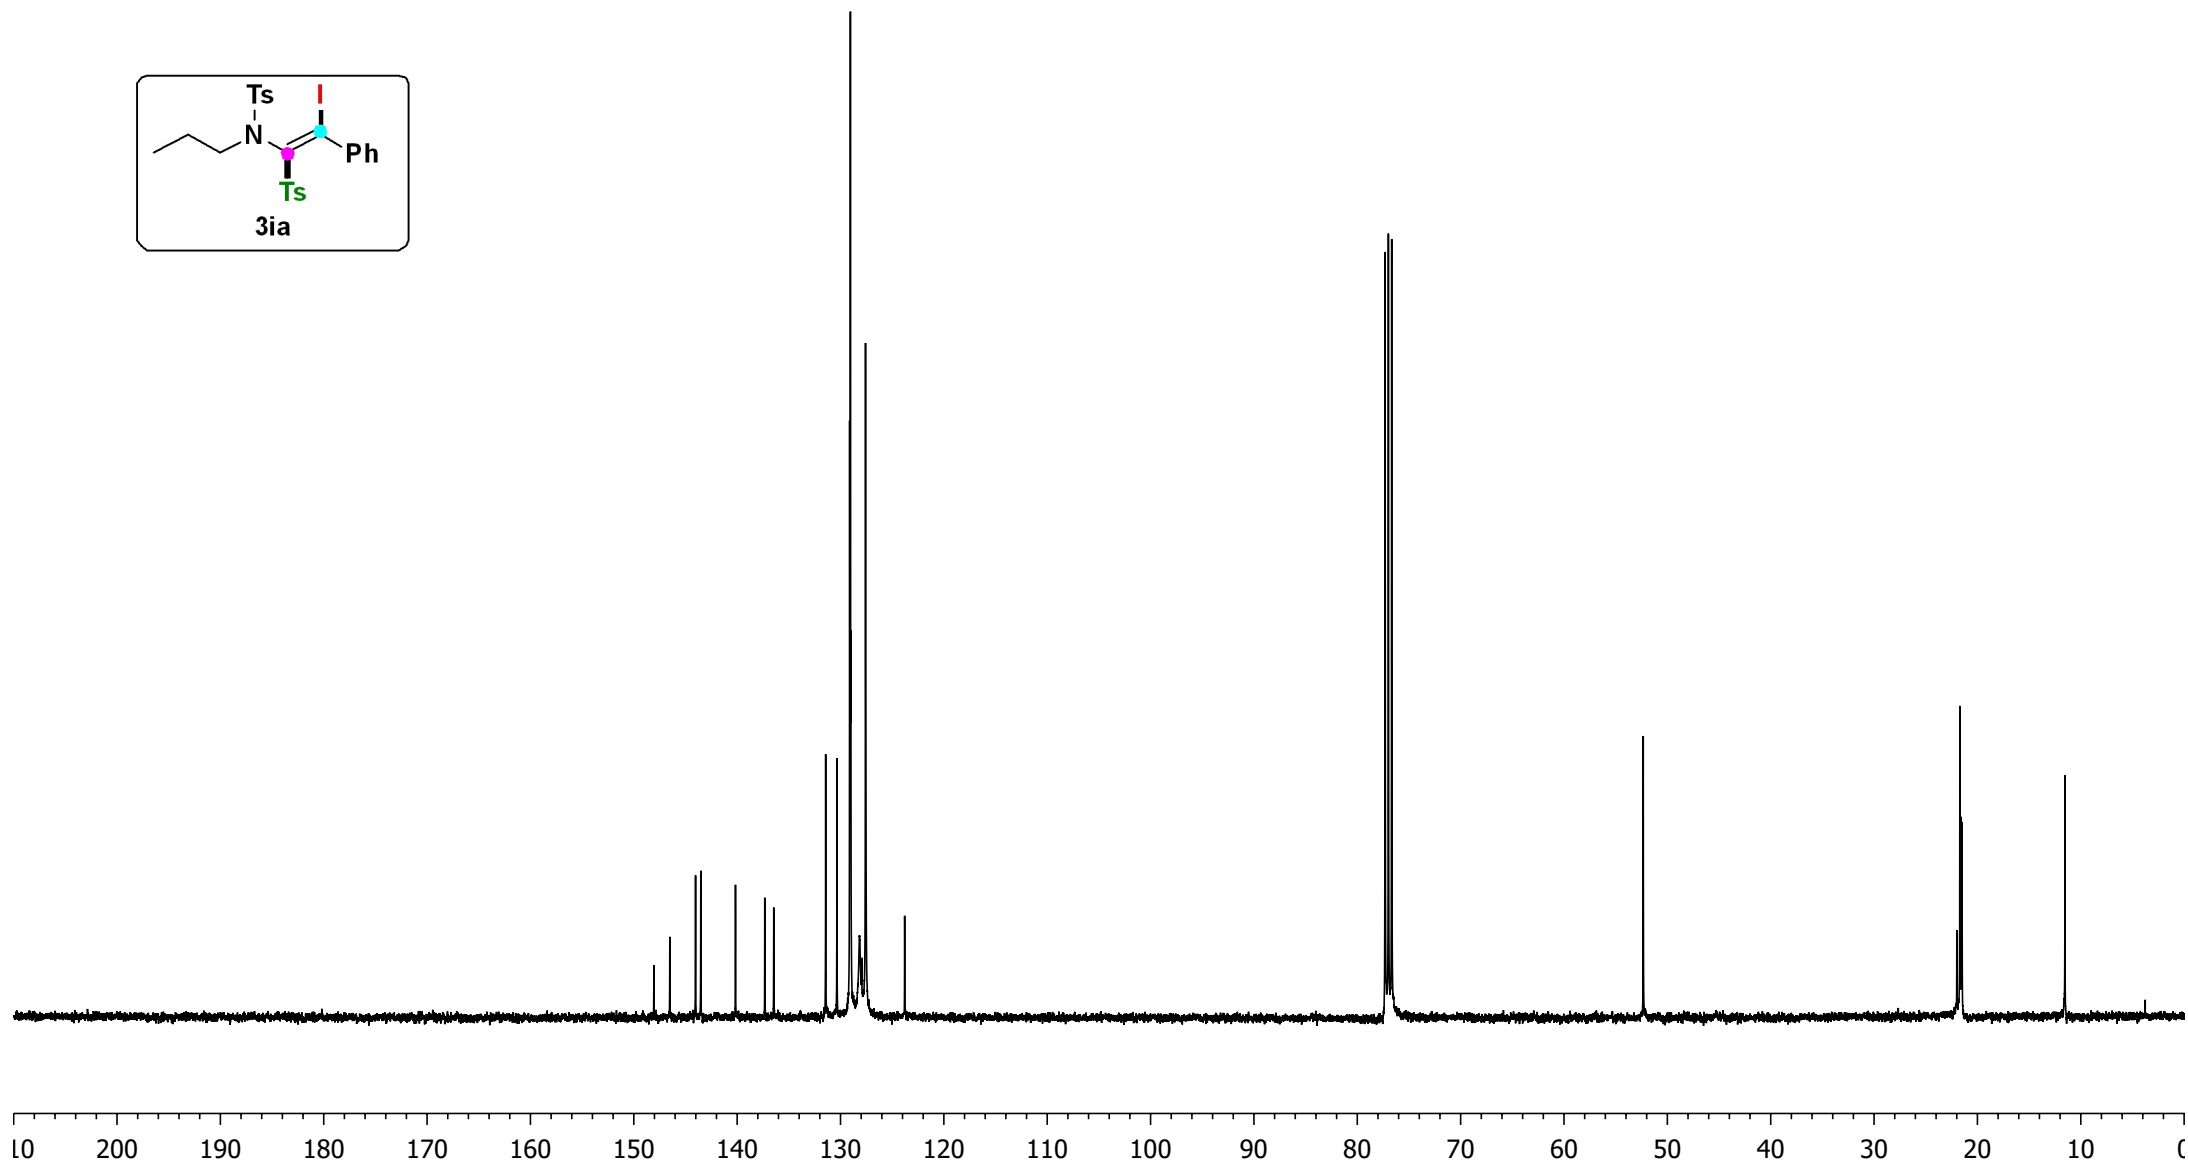



M0322-1  
LJ3-11

7.98  
7.97  
7.96  
7.96  
7.95  
7.69  
7.67  
7.43  
7.43  
7.42  
7.41  
7.41  
7.40  
7.38  
7.26  
7.20  
7.18  
7.17  
7.15  
7.09  
6.83  
6.65

Solvent  $\text{CDCl}_3$   
Spectrometer Frequency 400.40  
Nucleus  $^1\text{H}$

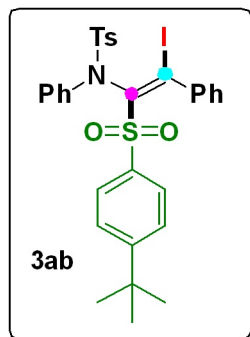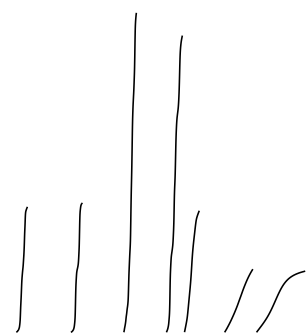

1.99  
2.06  
5.08  
4.71  
1.93  
1.00  
0.97

2.36

3.00

1.30

9.08

S49  
0.00

11.0 10.5 10.0 9.5 9.0 8.5 8.0 7.5 7.0 6.5 6.0 5.5 5.0 4.5 4.0 3.5 3.0 2.5 2.0 1.5 1.0 0.5 0.0

Solvent  $\text{CDCl}_3$   
Spectrometer Frequency 100.69  
Nucleus  $^{13}\text{C}$

156.4  
148.0  
144.0  
140.0  
138.9  
137.1  
135.9  
129.2  
129.1  
129.0  
128.7  
128.6  
128.4  
127.6  
125.5  
123.8

77.3  
77.0  
76.7

35.0  
31.0  
21.6

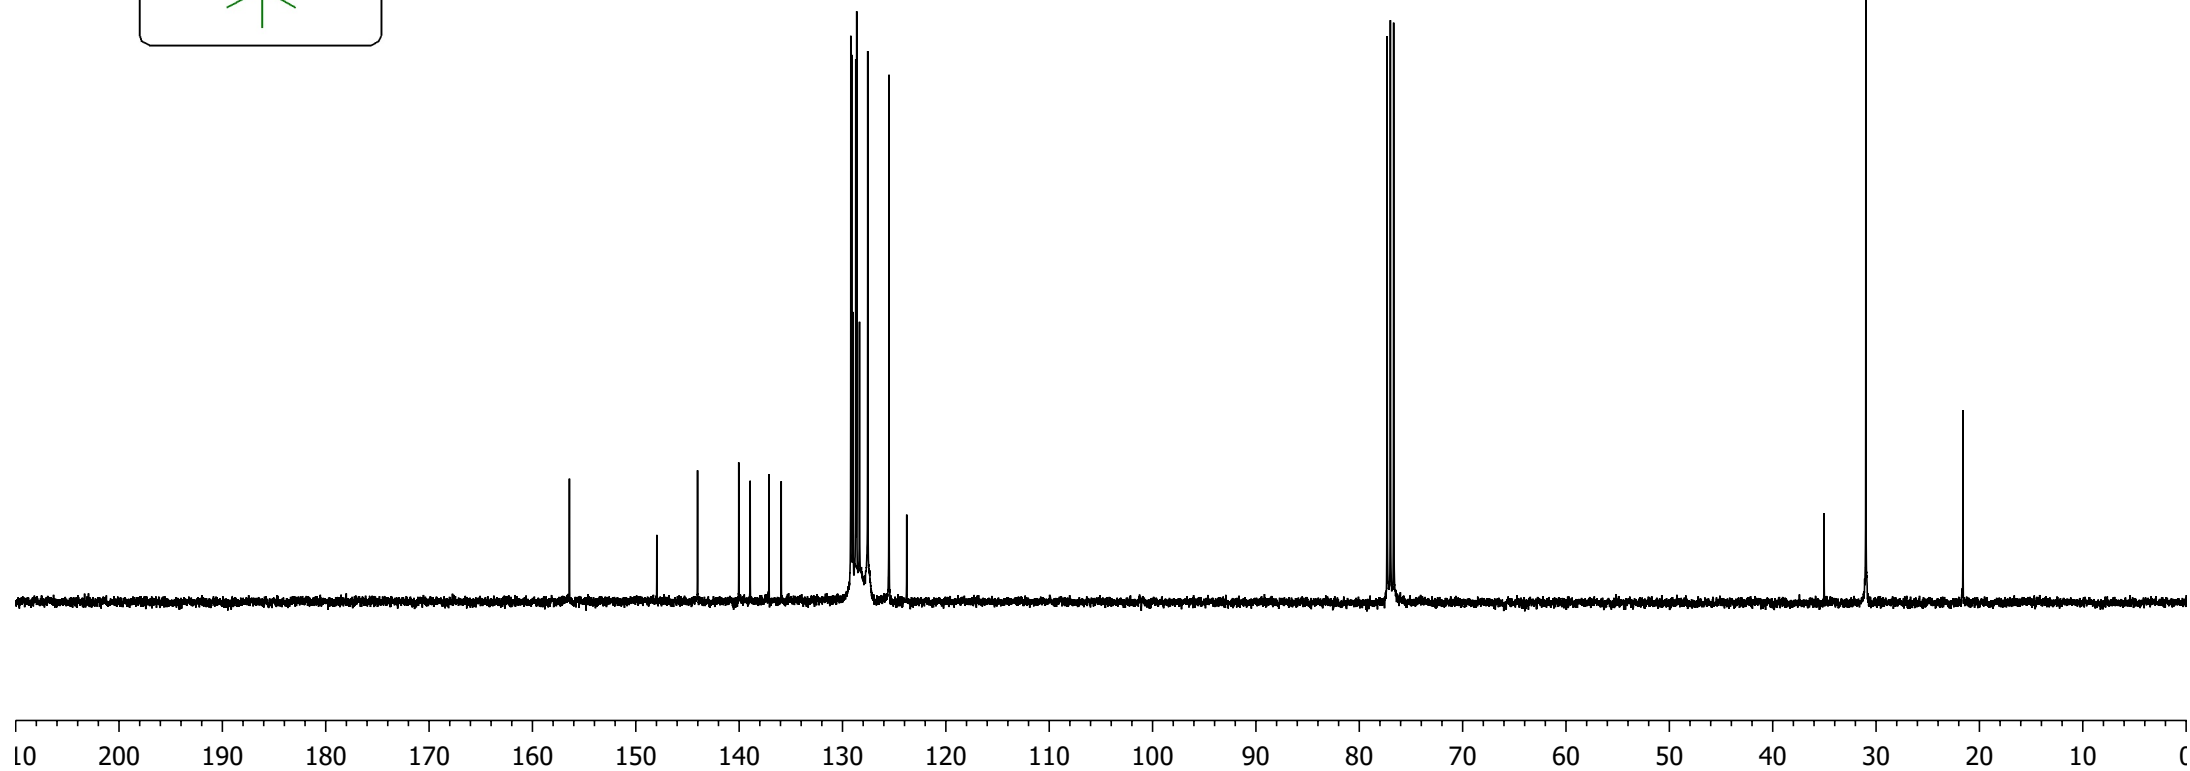

M0438-4  
LJ3-24

7.97  
7.95  
7.73  
7.71  
7.48  
7.45  
7.45  
7.44  
7.44  
7.43  
7.43  
7.42  
7.32  
7.30  
7.26  
7.14  
7.12  
7.10  
6.98  
6.96  
6.68

2.34

S51  
0.00

Solvent  $\text{CDCl}_3$   
Spectrometer Frequency 400.40  
Nucleus  $^1\text{H}$

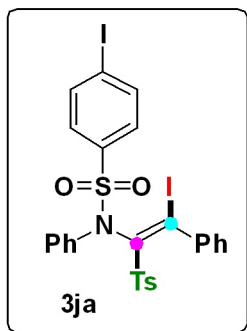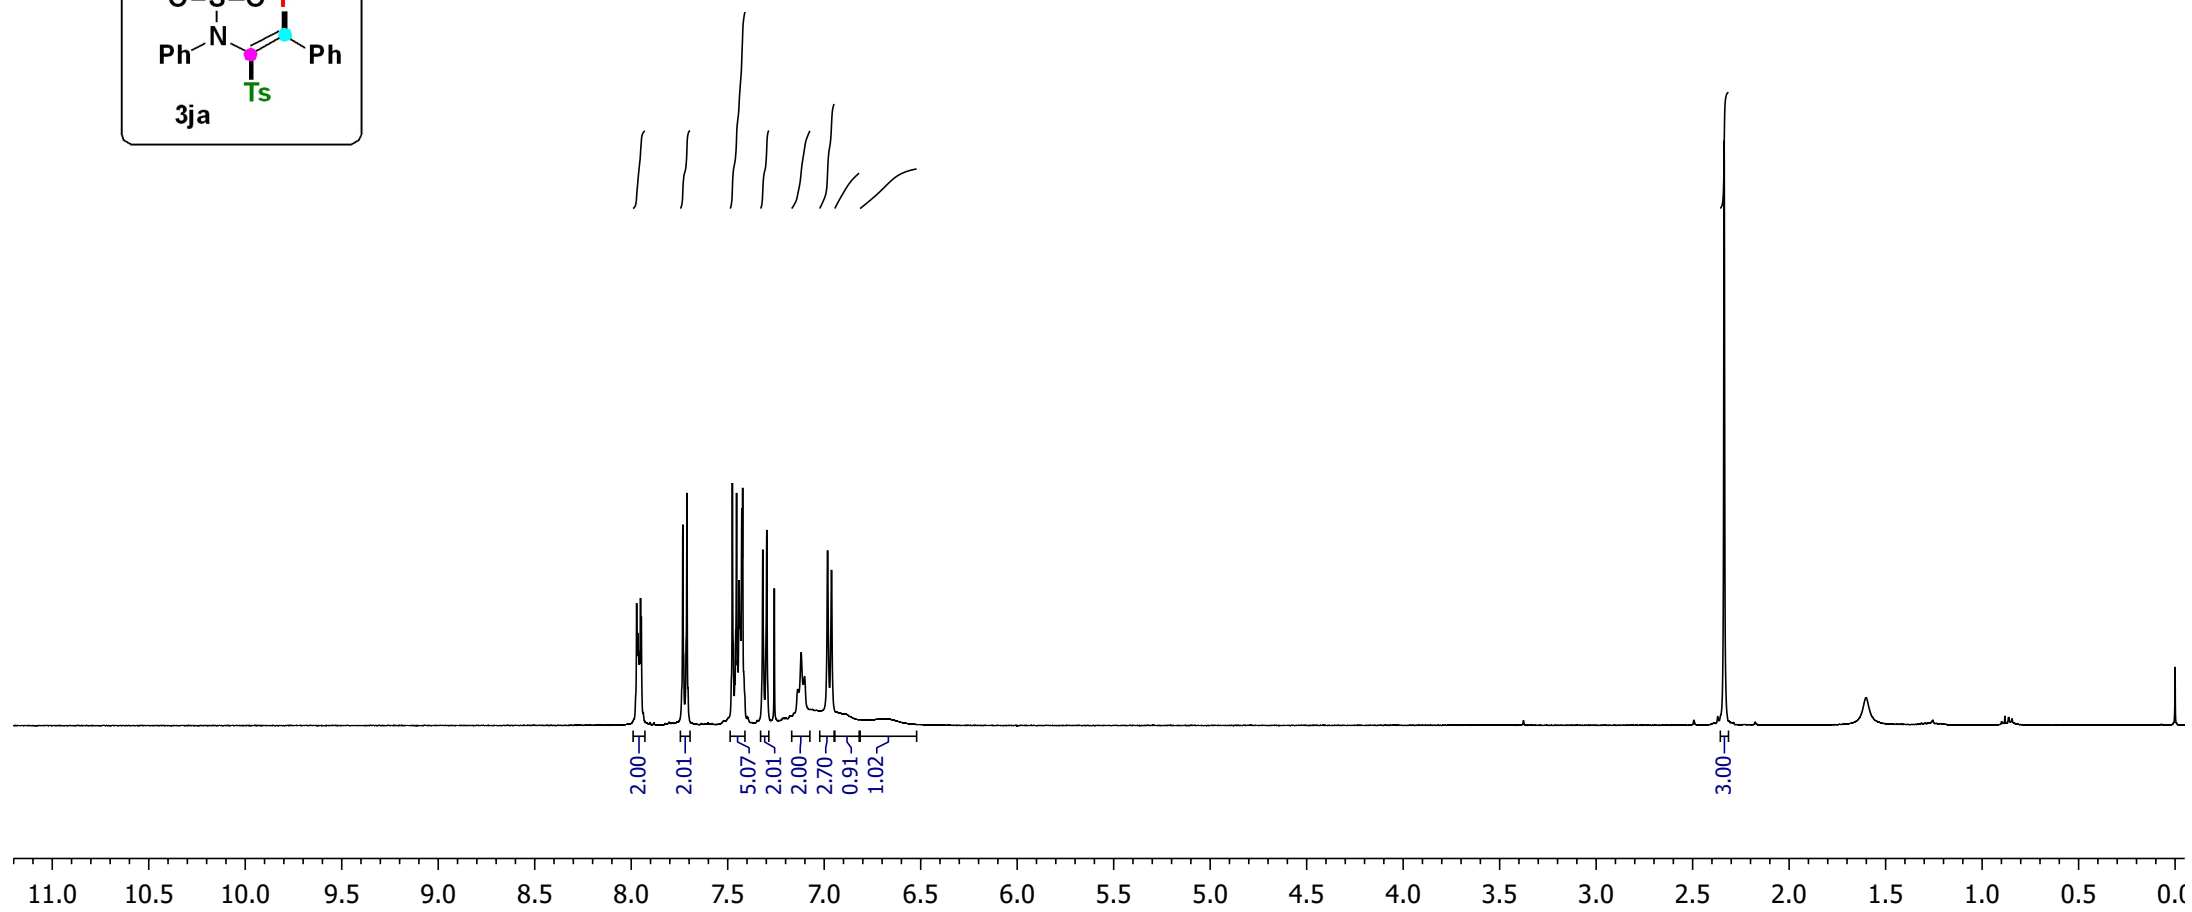

Solvent  $\text{CDCl}_3$   
Spectrometer Frequency 100.69  
Nucleus  $^{13}\text{C}$



147.6  
143.7  
139.8  
138.6  
138.5  
137.2  
137.1  
130.3  
129.4  
129.2  
129.1  
128.8  
128.7  
128.3  
127.8  
127.5  
124.2

101.1

77.3  
77.0  
76.7

21.5

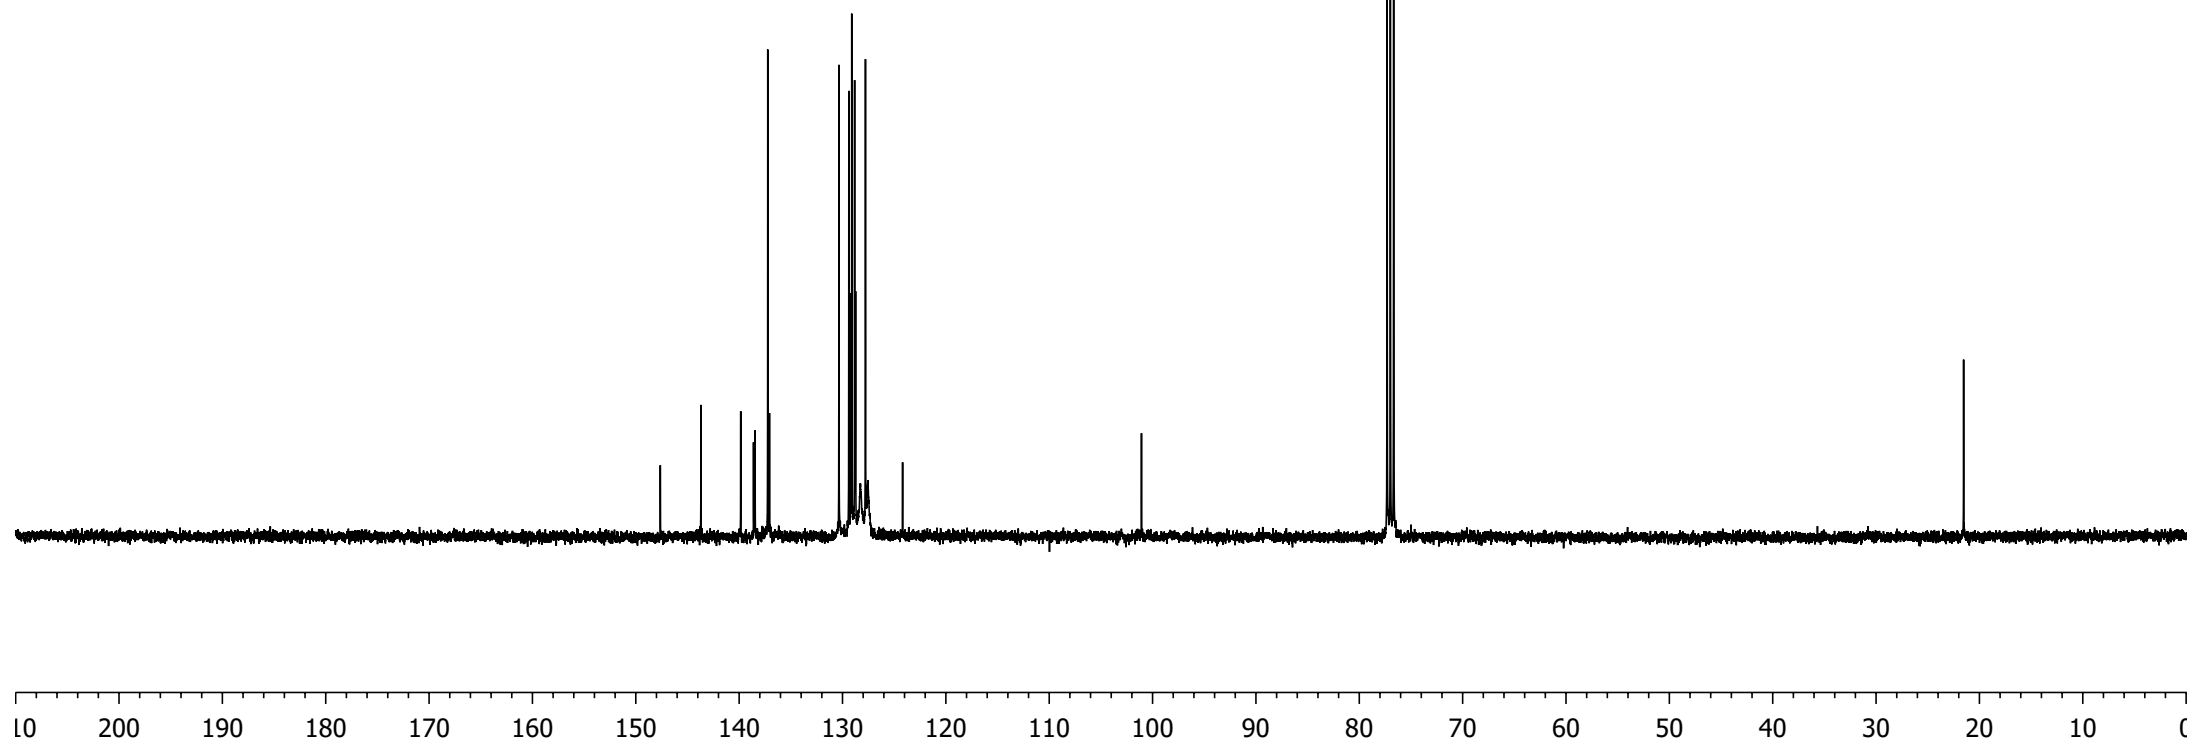

Solvent  $\text{CDCl}_3$   
Spectrometer Frequency 400.40  
Nucleus  $^1\text{H}$

8.38  
7.98  
7.97  
7.96  
7.86  
7.83  
7.82  
7.61  
7.59  
7.57  
7.54  
7.52  
7.50  
7.40  
7.39  
7.39  
7.35  
7.33  
7.26  
7.13  
7.11  
6.99  
6.97

2.35

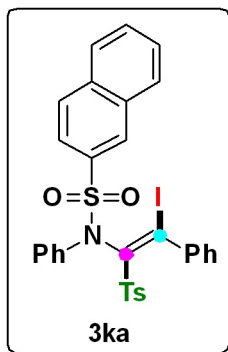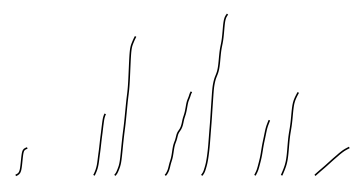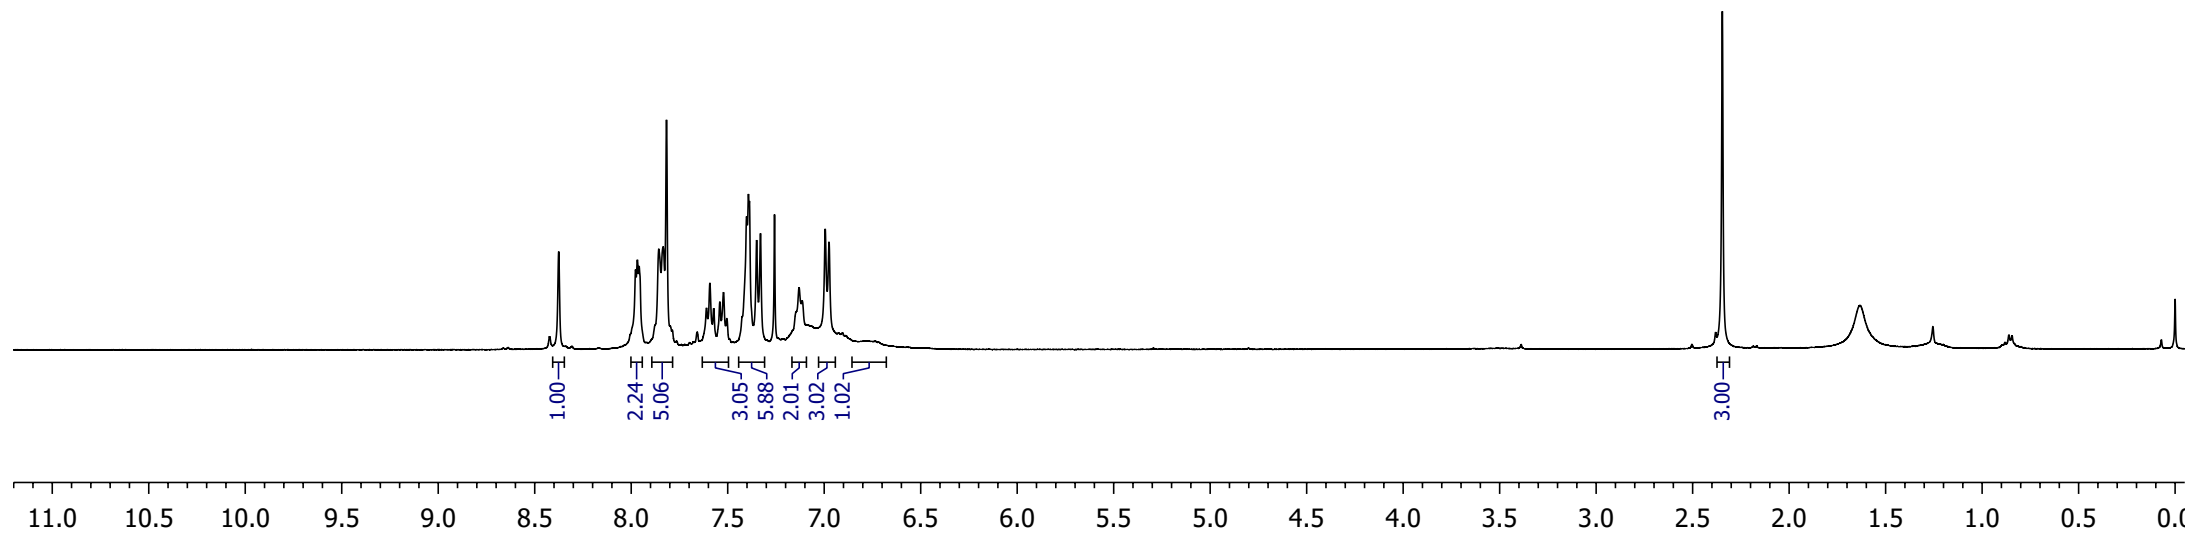

148.0  
143.6  
140.1  
139.0  
137.3  
136.0  
135.1  
131.6  
130.8  
129.5  
129.3  
129.3  
129.1  
129.1  
128.8  
128.8  
128.5  
127.9  
127.9  
127.8  
127.7  
127.1  
124.3  
123.7

77.3  
77.0  
76.7

21.5

Solvent  $\text{CDCl}_3$   
Spectrometer Frequency 100.69  
Nucleus  $^{13}\text{C}$

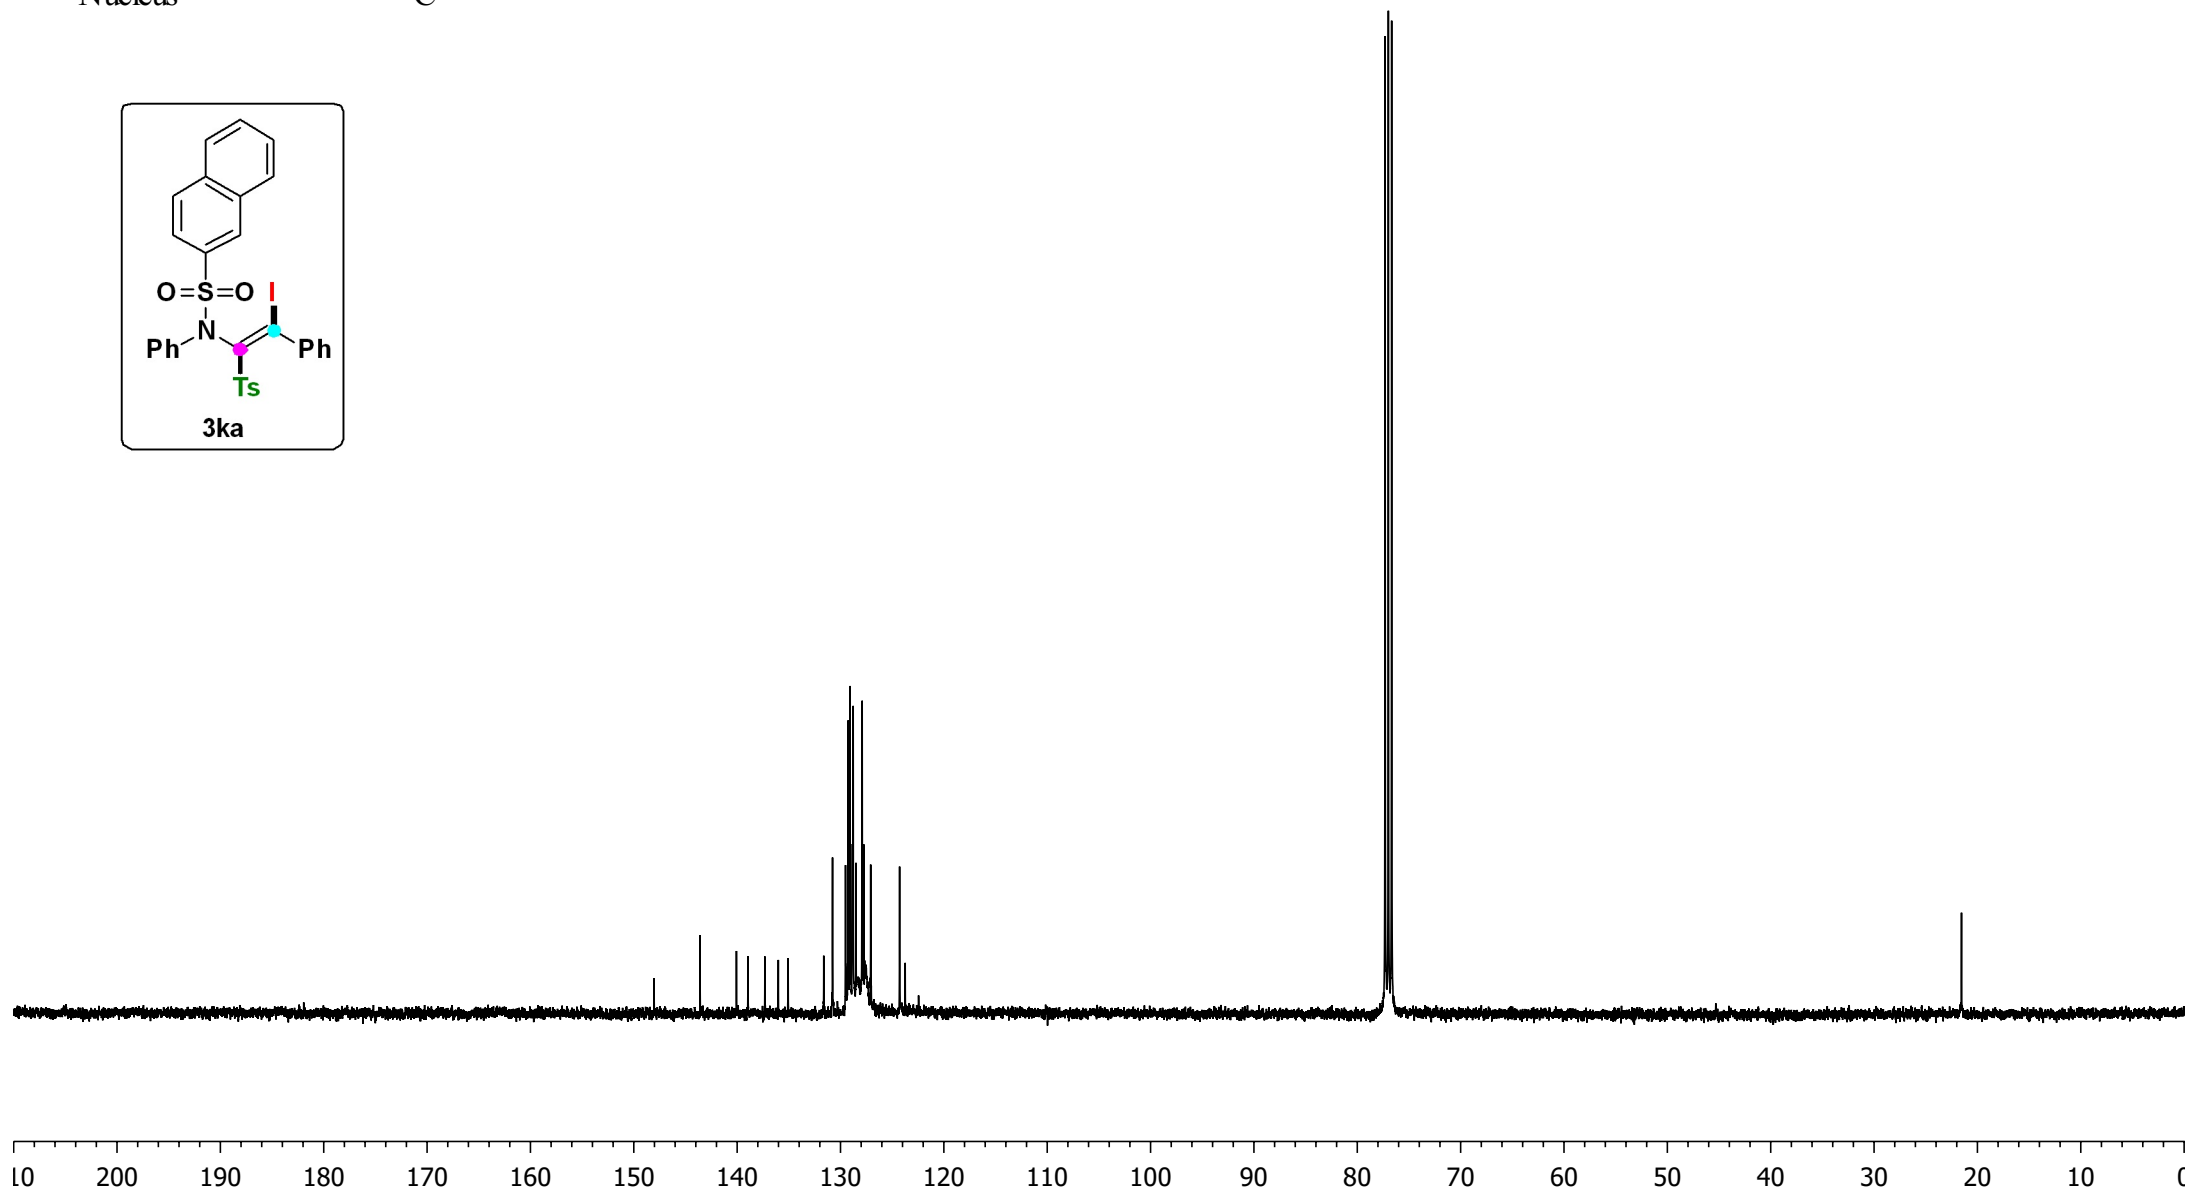

M0438-1  
LJ3-23(N-Boc)

7.62  
7.60  
7.57  
7.55  
7.45  
7.43  
7.41  
7.40  
7.38  
7.36  
7.34  
7.33  
7.32  
7.31  
7.30  
7.26  
7.25  
7.24  
7.22  
7.20  
7.17  
7.12  
7.10  
6.99  
6.97

2.35  
2.32

1.67  
1.58

S55

-0.00

Solvent  $\text{CDCl}_3$   
Spectrometer Frequency 400.40  
Nucleus  $^1\text{H}$

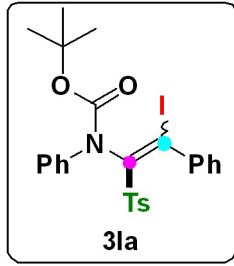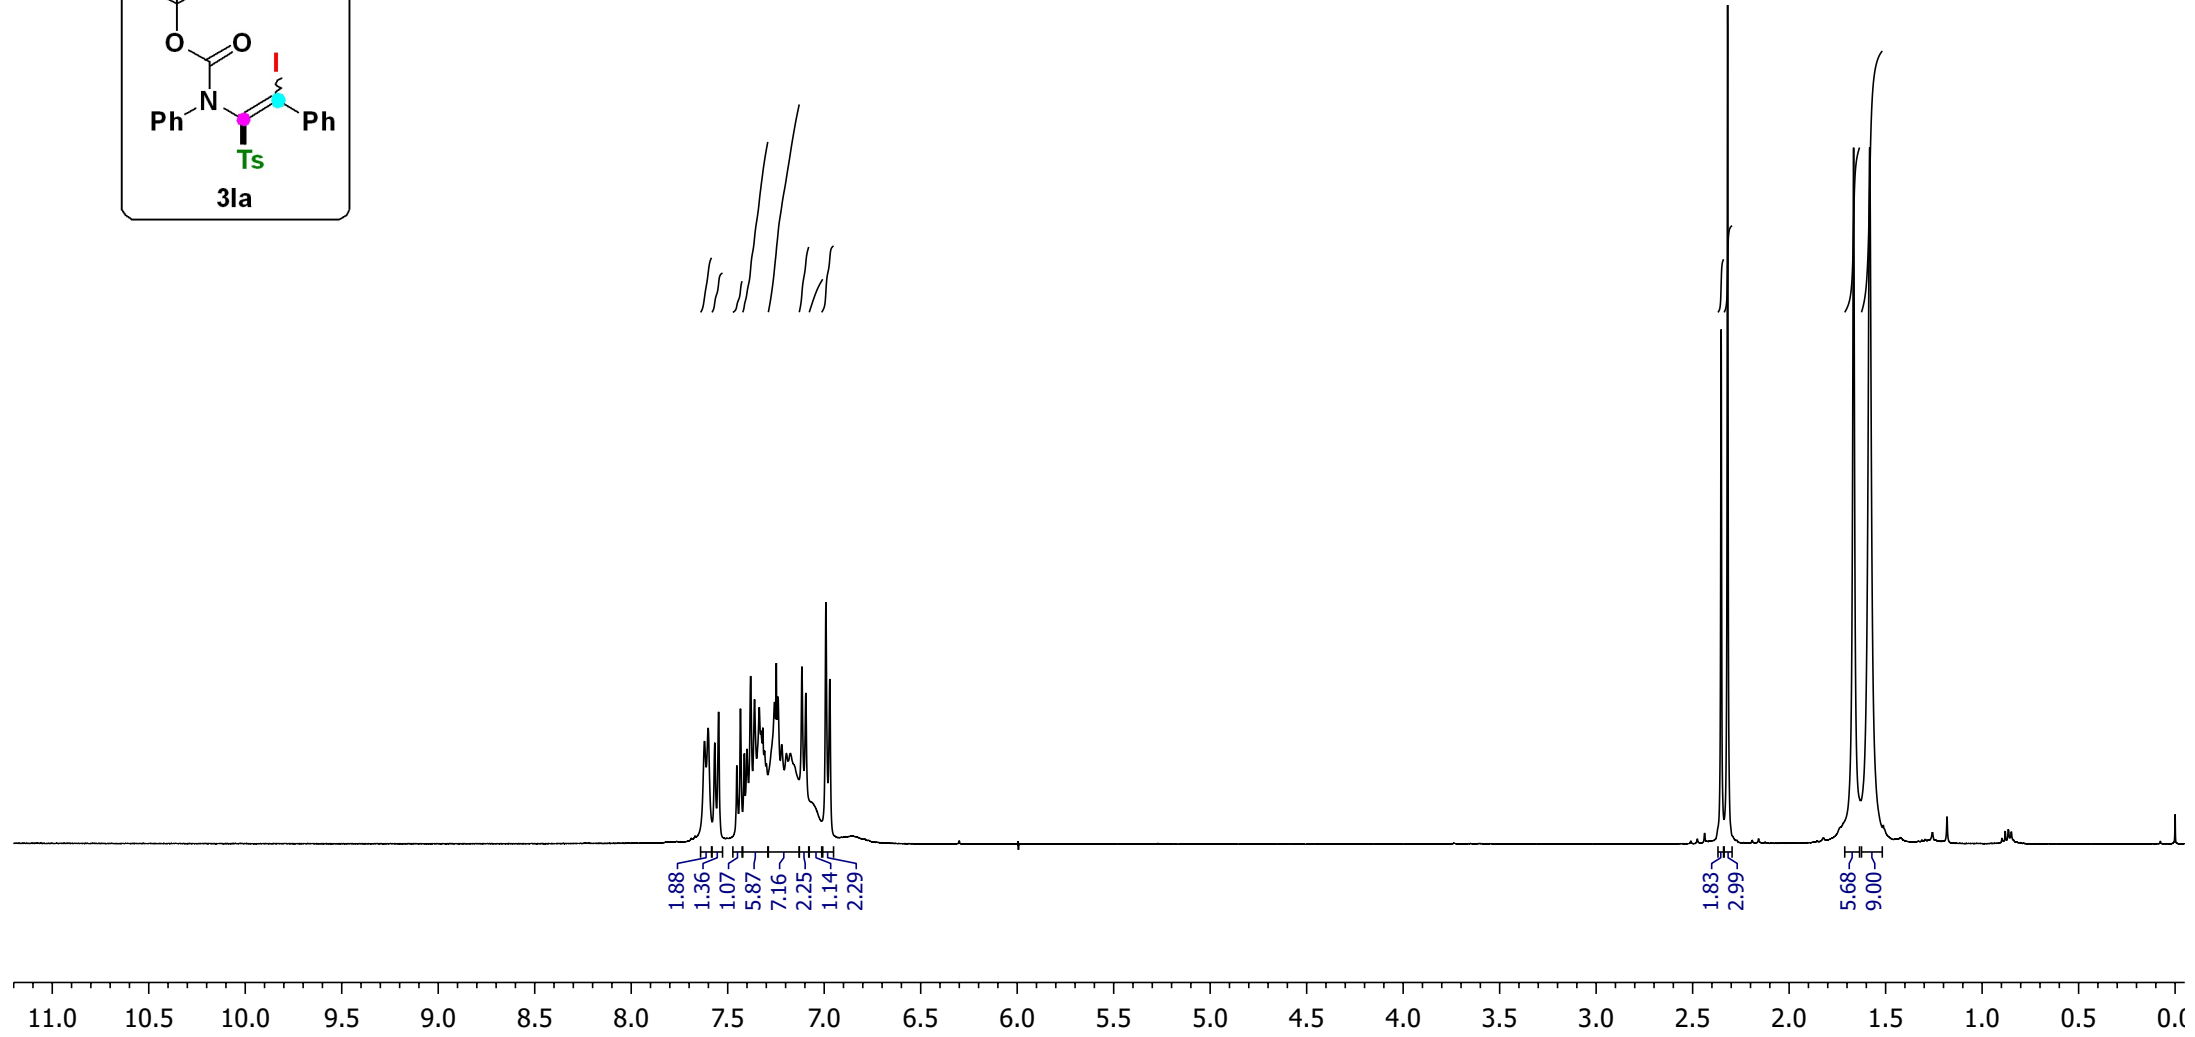

Solvent  $\text{CDCl}_3$   
Spectrometer Frequency 100.69  
Nucleus  $^{13}\text{C}$

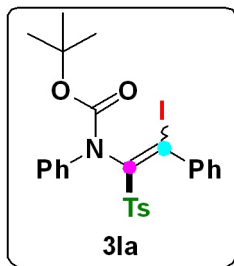

150.5  
145.7  
144.7  
130.1  
129.3  
129.1  
128.9  
128.8  
128.6  
128.4  
128.2  
127.9  
127.8  
126.9

83.5  
82.9  
77.3  
77.0  
76.7

28.1  
28.1  
21.6  
21.5

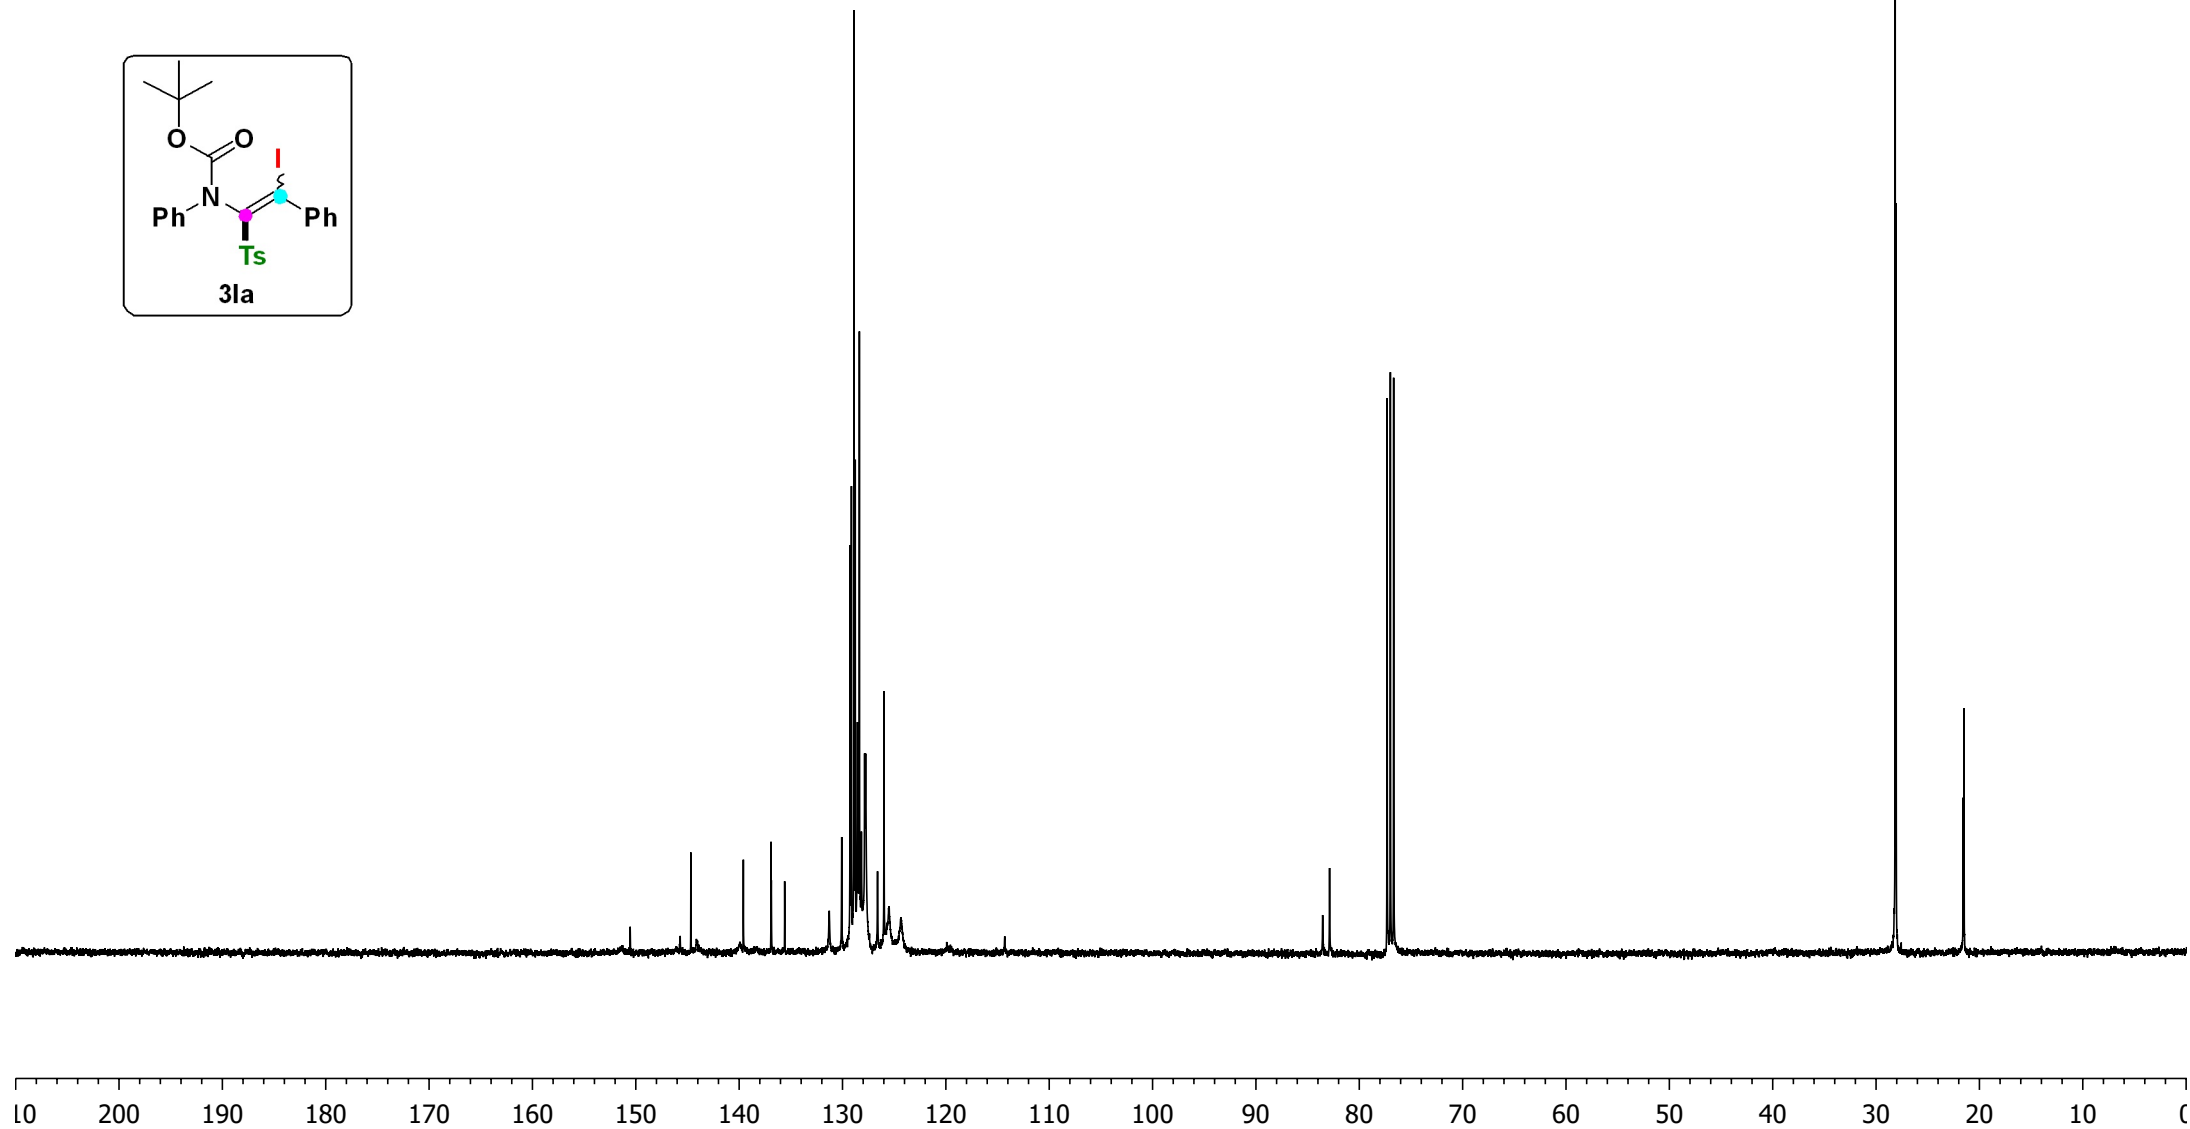



8.21  
8.19  
7.51  
7.49  
7.41  
7.38  
7.27  
7.26  
7.26  
7.25  
7.25  
7.24  
7.18  
7.16  
7.06  
7.05  
7.05  
7.04  
7.04  
7.03

2.49  
2.39

Solvent  $\text{CDCl}_3$   
Spectrometer Frequency 400.40  
Nucleus  $^1\text{H}$

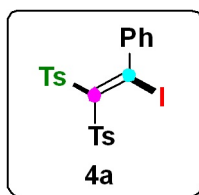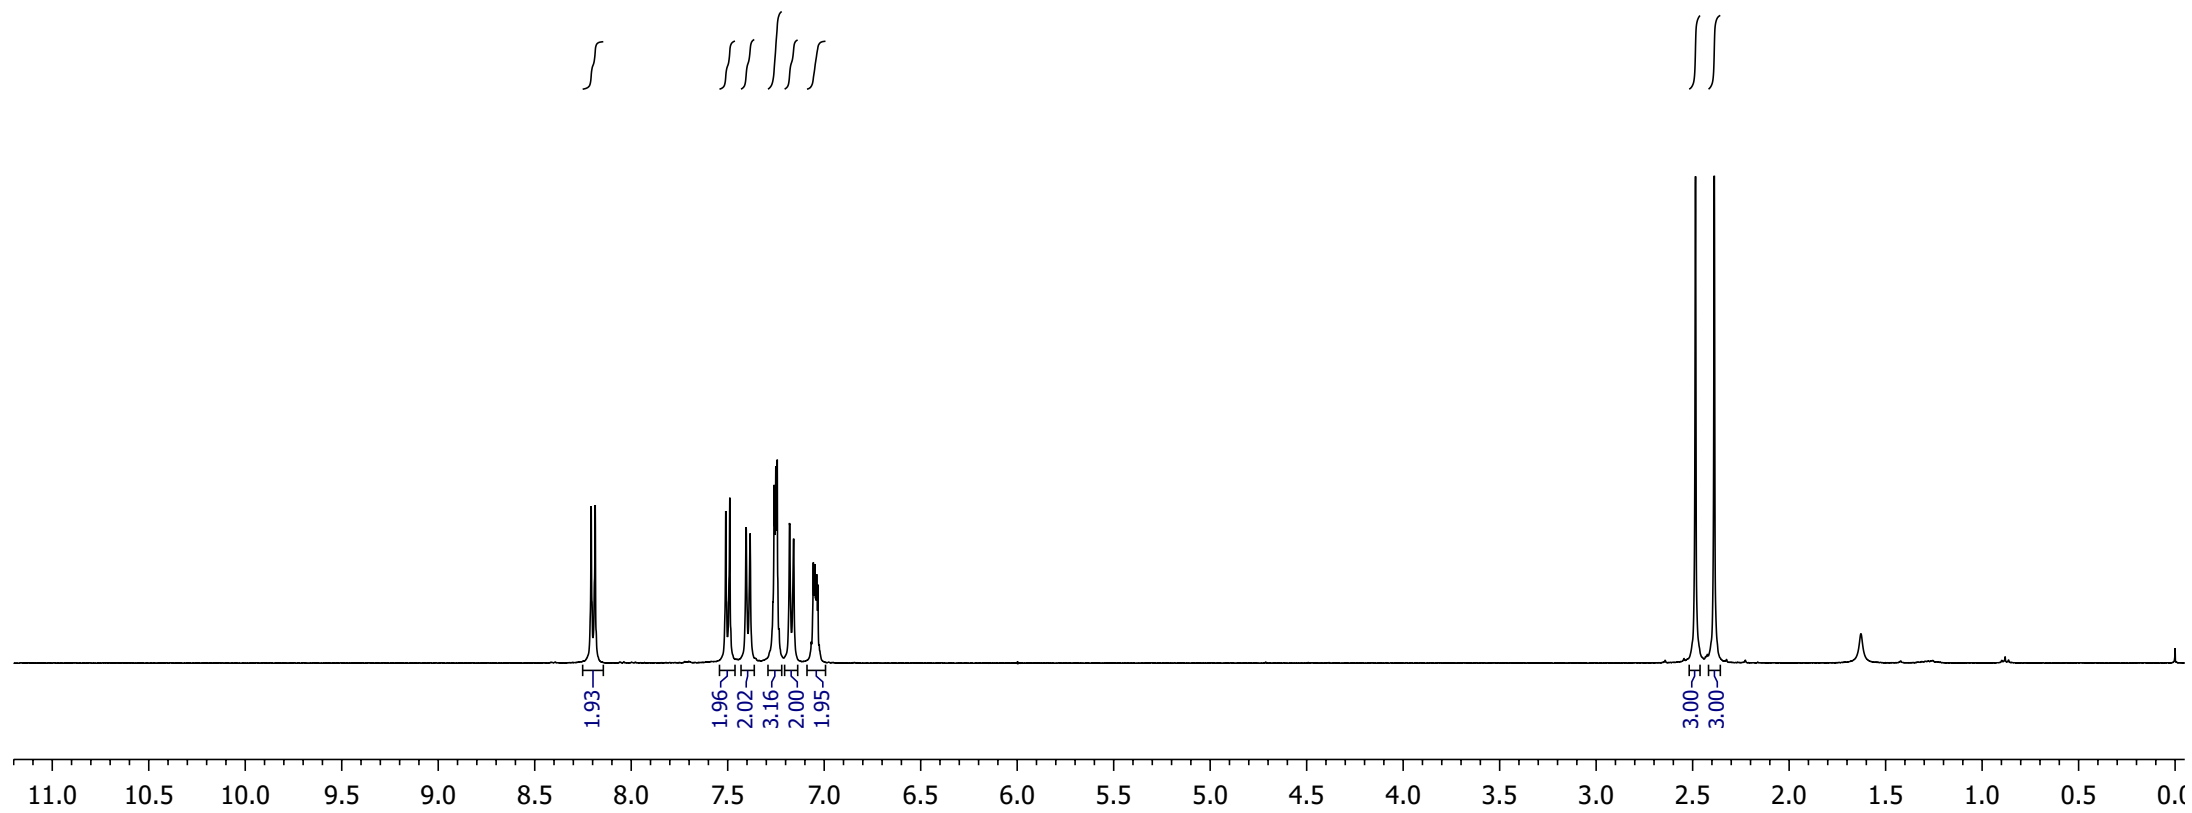

M0150-17  
LJ3-2

150.2  
145.4  
144.7  
144.5  
137.9  
136.5  
129.7  
129.5  
129.5  
129.3  
128.4  
127.8  
127.6  
126.4

77.3  
77.0  
76.7

21.8  
21.6

Solvent  $\text{CDCl}_3$   
Spectrometer Frequency 100.69  
Nucleus  $^{13}\text{C}$

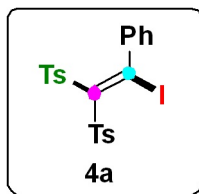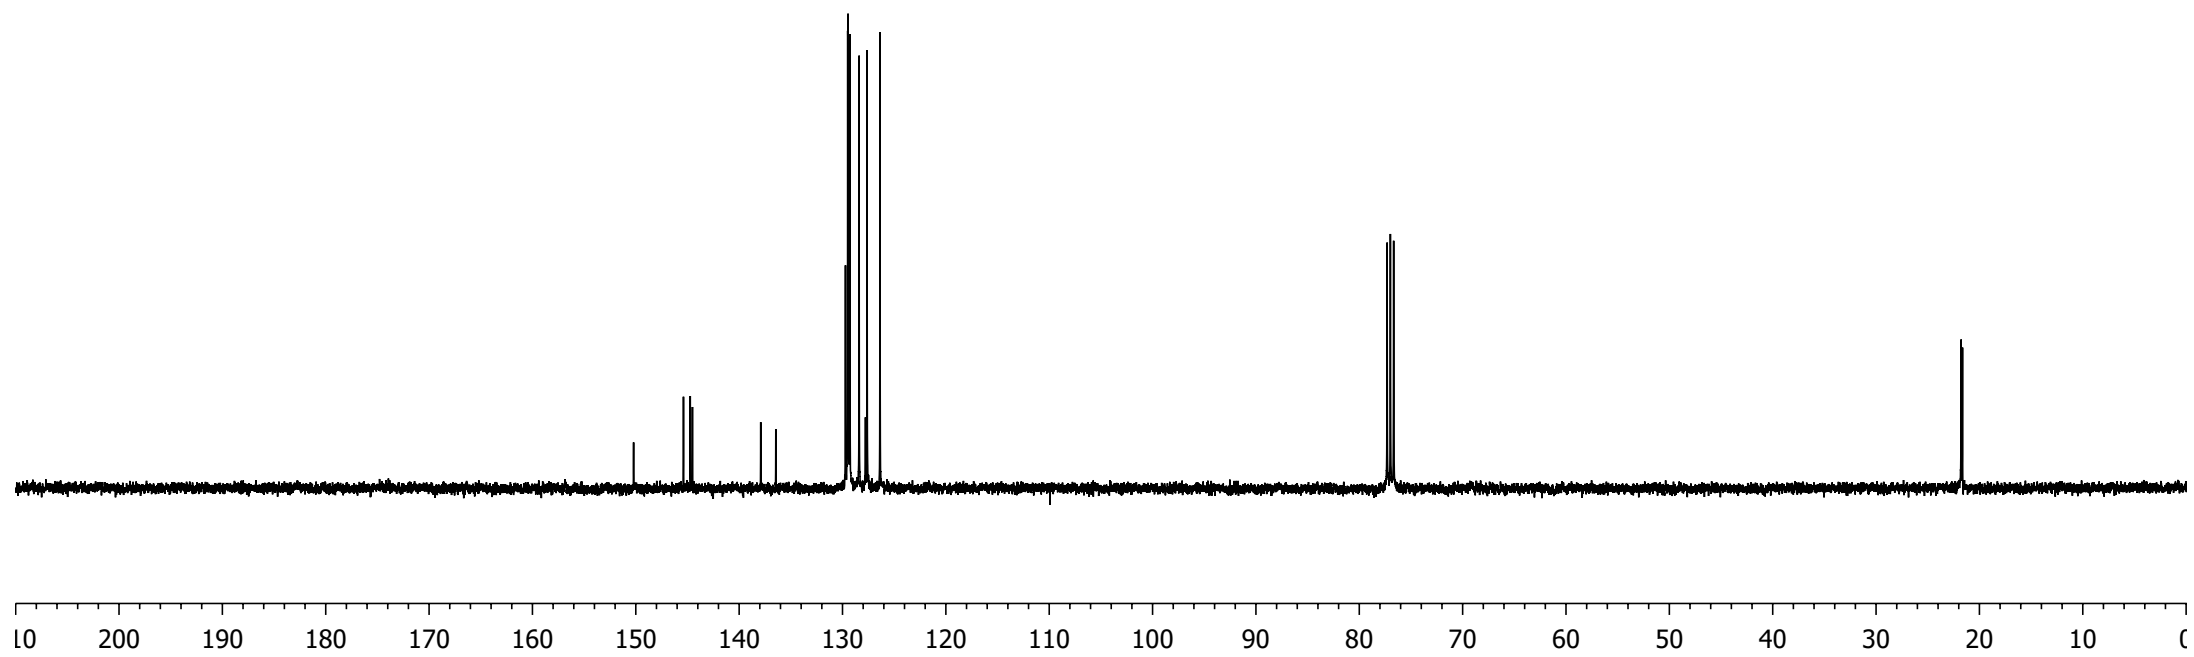

Solvent CDCl<sub>3</sub>  
Spectrometer Frequency 400.40  
Nucleus <sup>1</sup>H

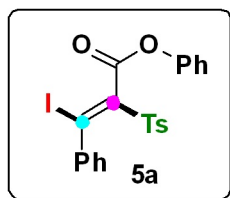

7.48  
7.46  
7.46  
7.44  
7.44  
7.38  
7.36  
7.33  
7.33  
7.32  
7.31  
7.31  
7.29  
7.28  
7.26  
7.26  
7.14  
7.12

—2.39

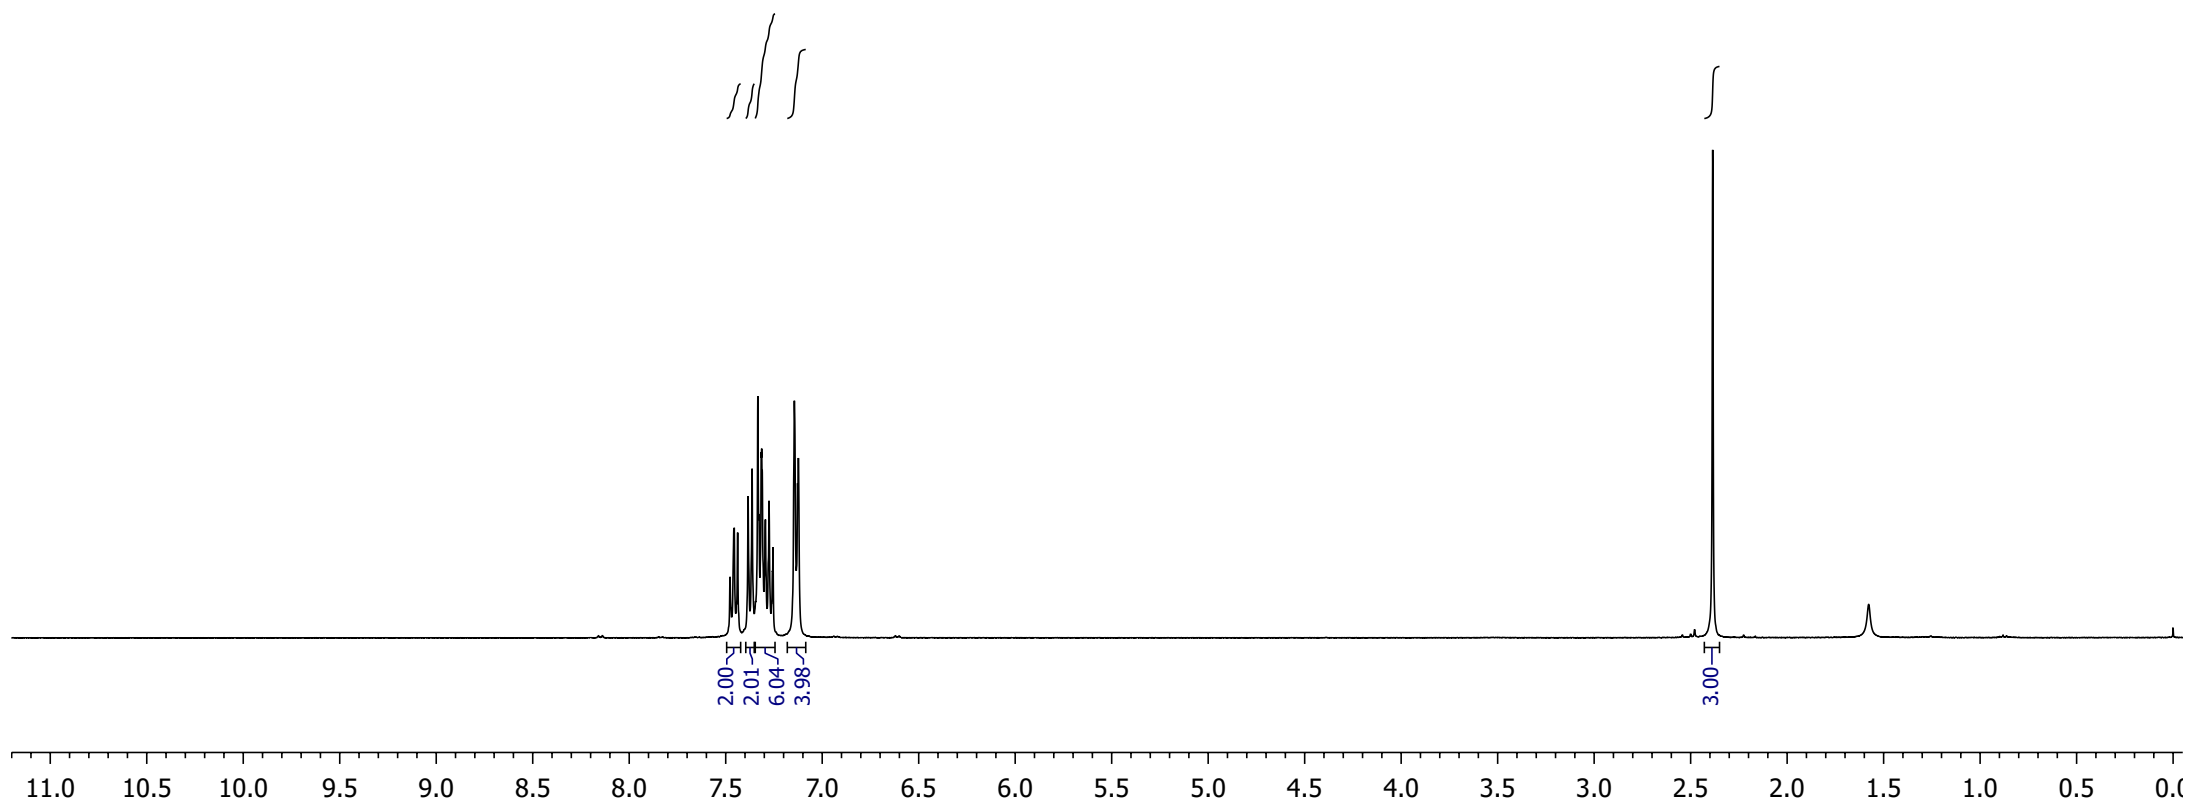

Solvent  $\text{CDCl}_3$   
Spectrometer Frequency 100.69  
Nucleus  $^{13}\text{C}$



162.2  
150.3  
146.2  
145.1  
139.4  
137.1  
129.6  
129.4  
128.4  
127.9  
127.3  
115.0

77.3  
77.0  
76.7

21.7

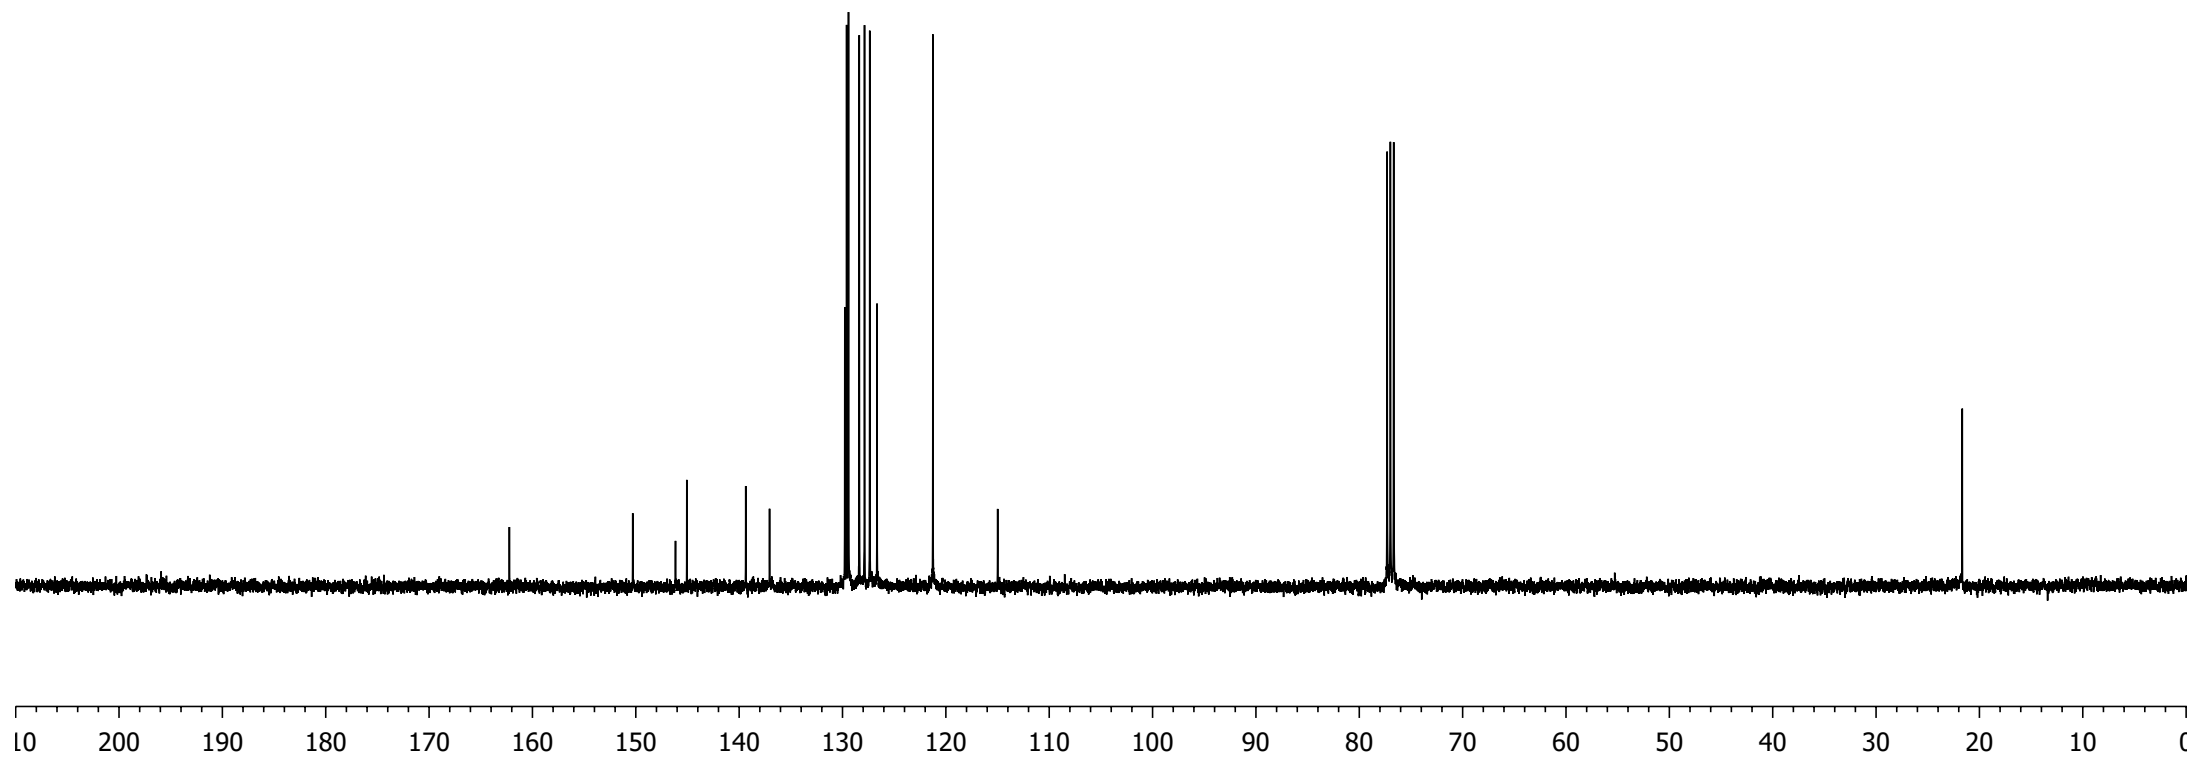

U0131-4  
LJ3-32

7.97  
7.60  
7.58  
7.54  
7.52  
7.41  
7.39  
7.37  
7.31  
7.31  
7.30  
7.26  
7.21  
7.19

2.40

1.62

S61  
0.00

Solvent  $\text{CDCl}_3$   
Spectrometer Frequency 400.28  
Nucleus  $^1\text{H}$

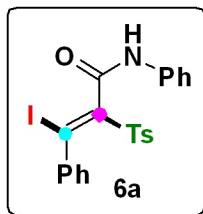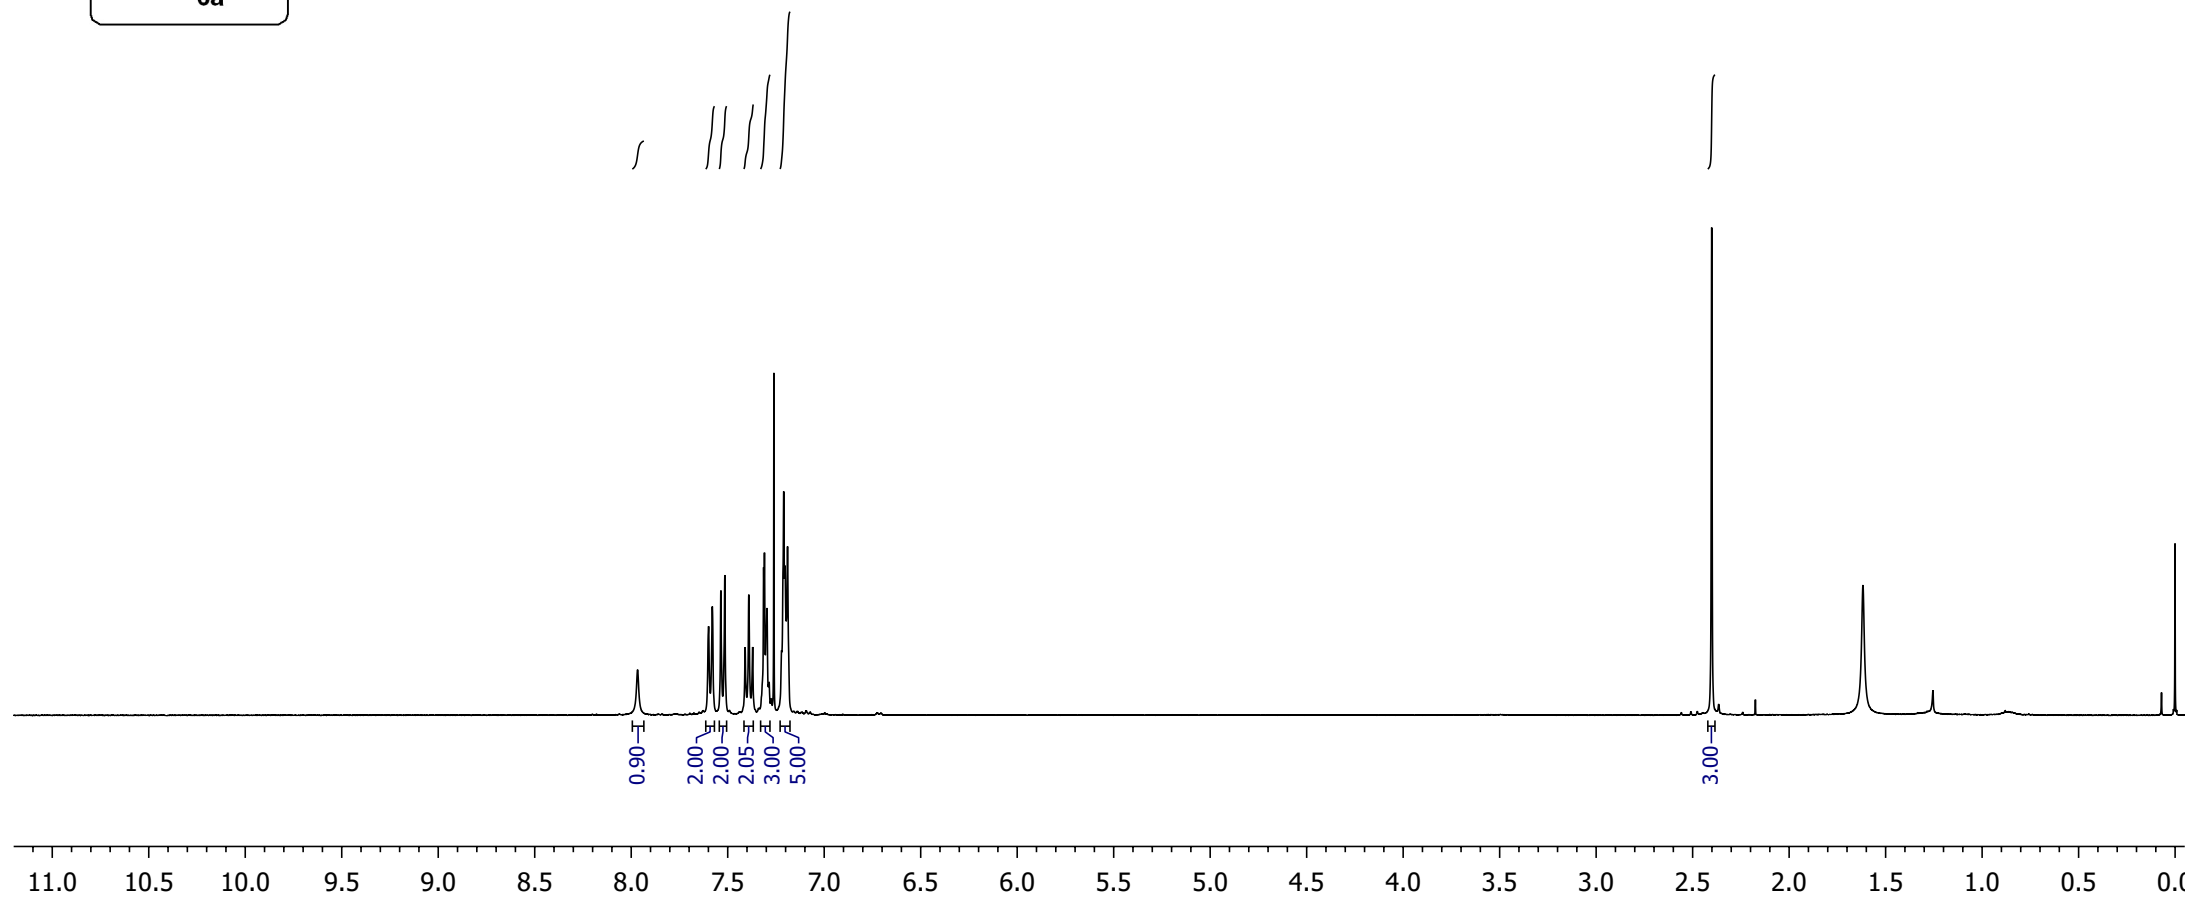

Solvent  $\text{CDCl}_3$   
Spectrometer Frequency 100.66  
Nucleus  $^{13}\text{C}$

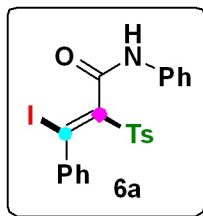

161.8

147.2  
145.2  
140.5  
136.8  
129.6  
129.6  
129.1  
128.5  
127.9  
127.0  
125.4  
120.5  
116.0

77.3  
77.0  
76.7

21.7

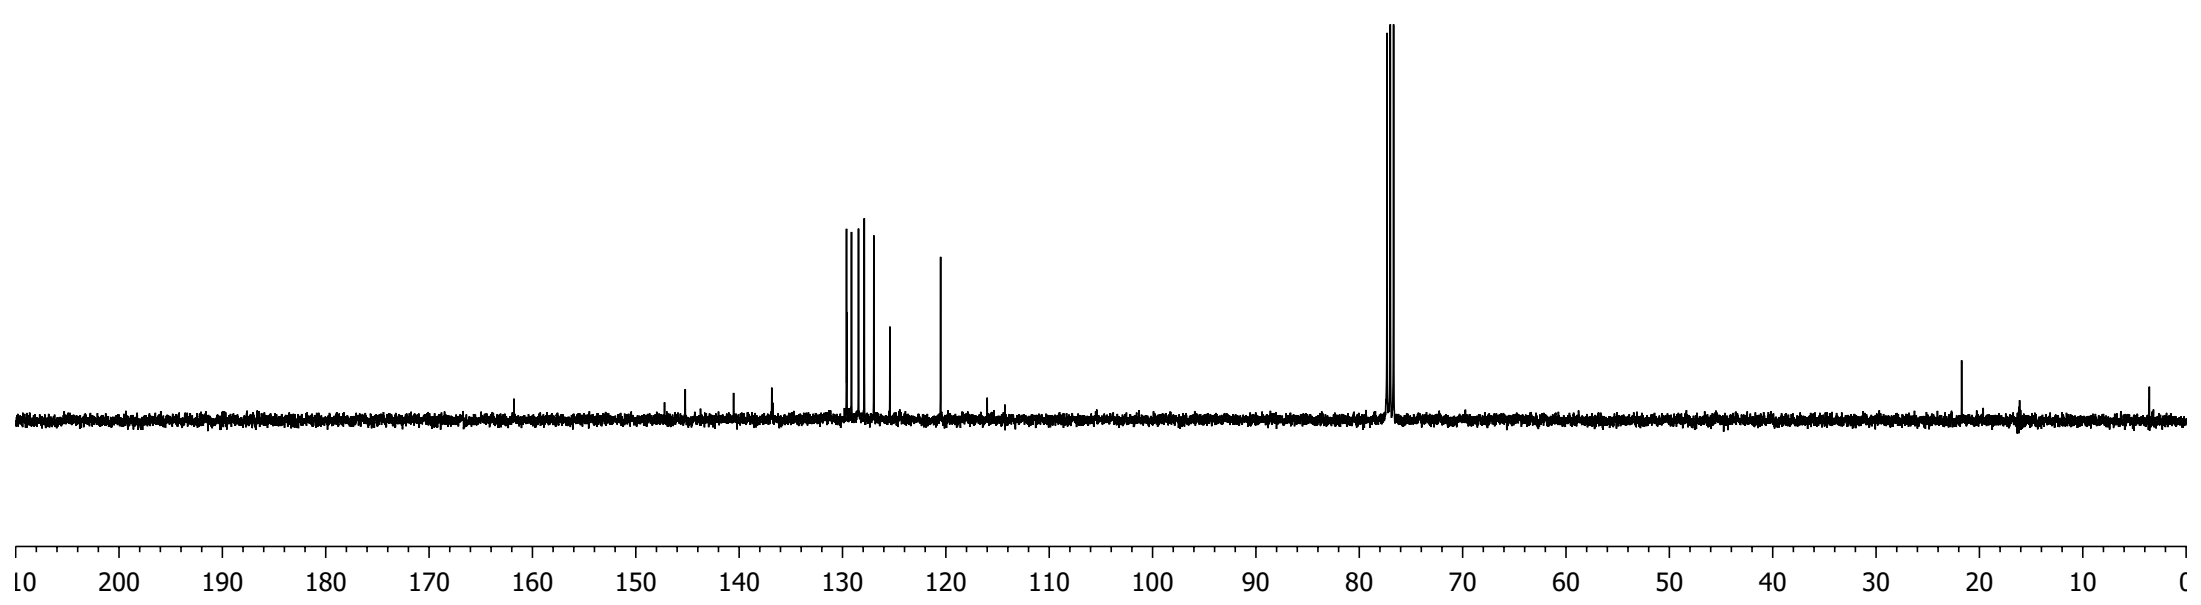

7.27  
7.16  
7.14  
7.13  
7.12  
7.01  
6.99  
6.72

3.84

2.34

1.84  
1.83

Solvent  $\text{CDCl}_3$   
Spectrometer Frequency 400.28  
Nucleus  $^1\text{H}$

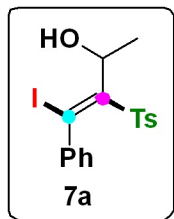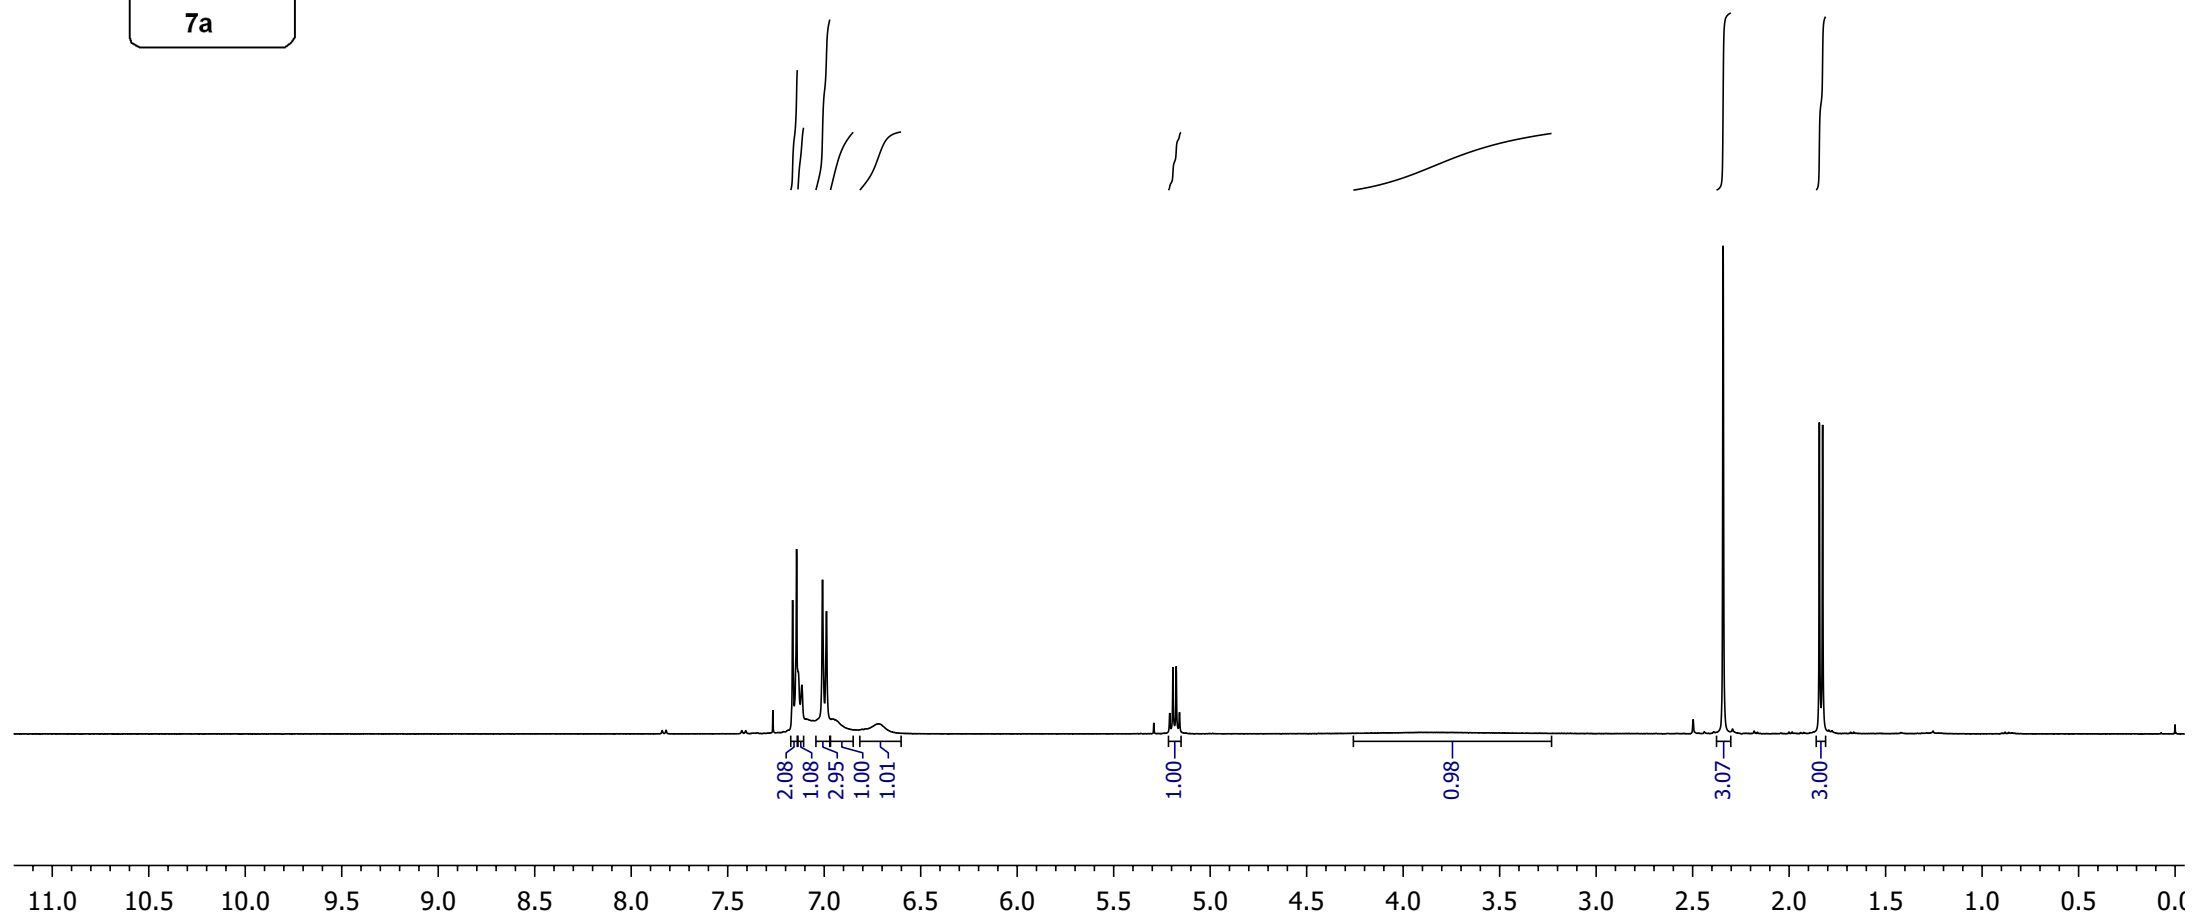

Solvent  $\text{CDCl}_3$   
Spectrometer Frequency 100.66  
Nucleus  $^{13}\text{C}$

—150.0  
~143.8  
~141.6  
~138.0  
~129.0  
~128.6  
~127.4  
~127.1  
—115.6

79.1  
77.3  
77.0  
76.7

22.3  
21.5

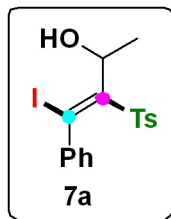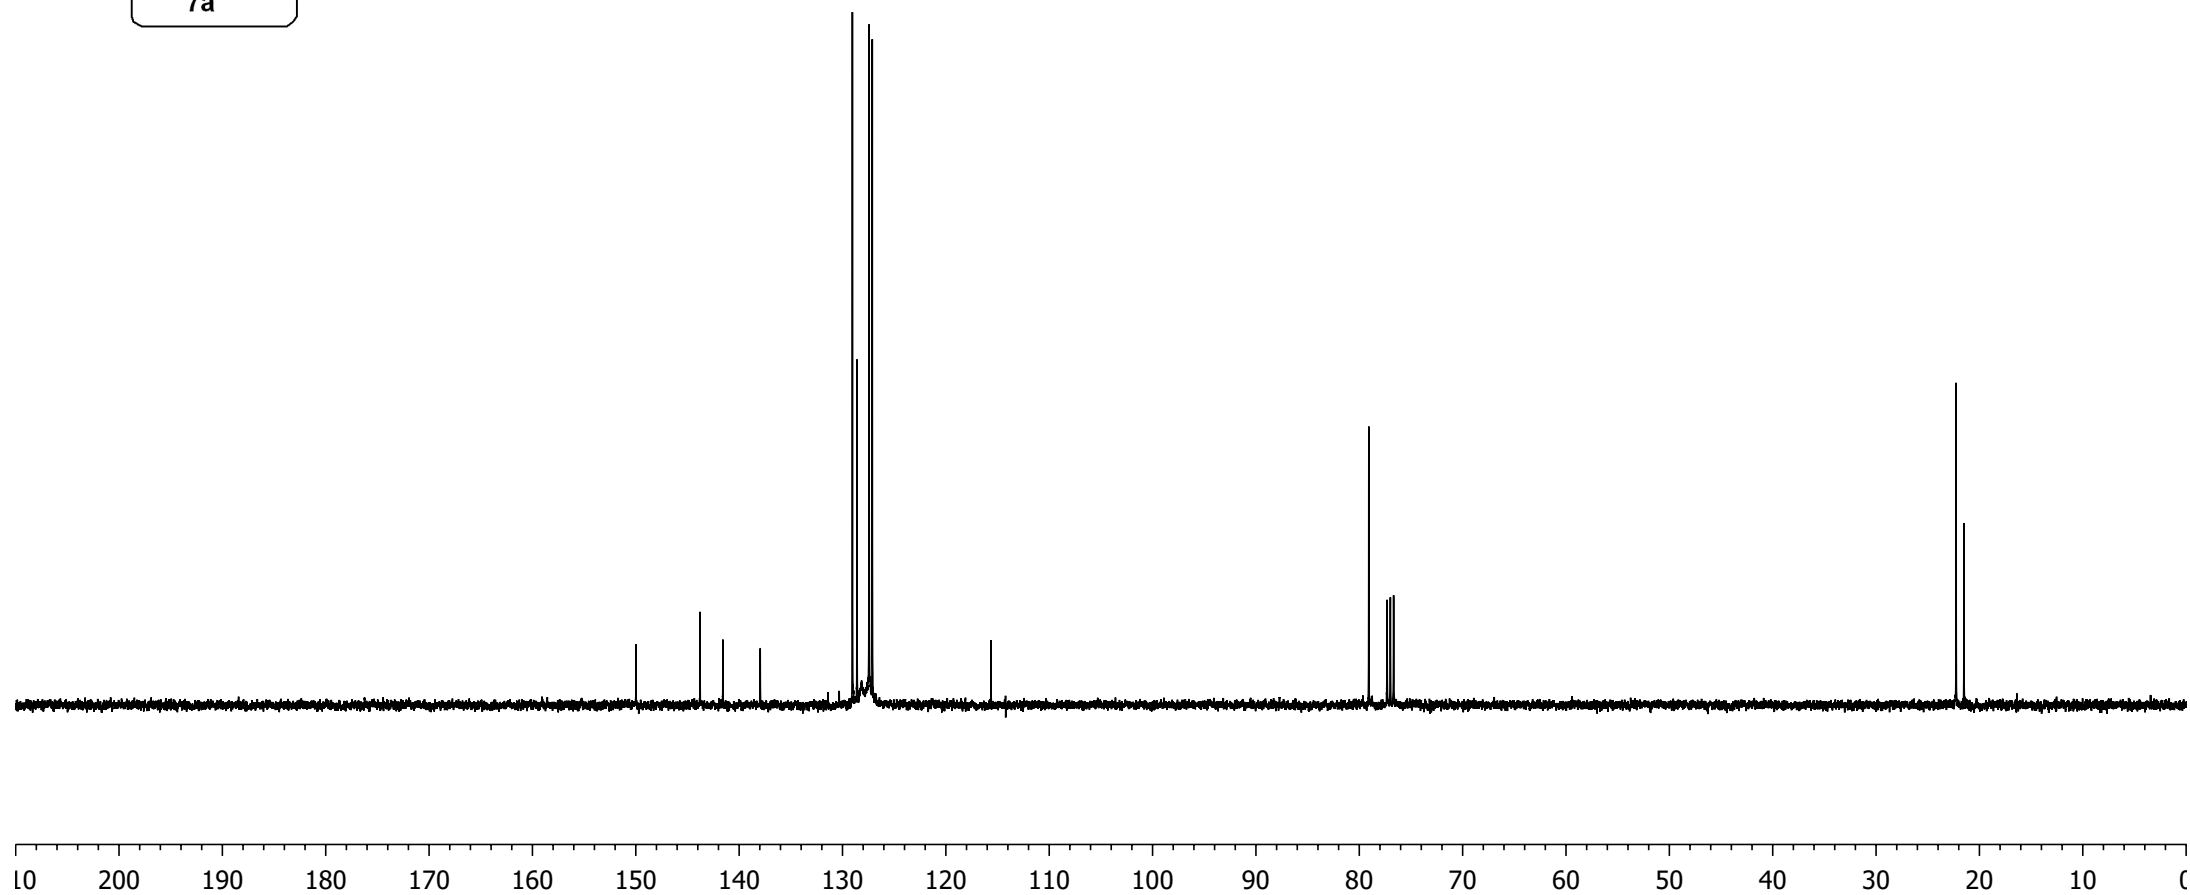



7.60  
7.58  
7.44  
7.42  
7.40  
7.38  
7.36  
7.25  
7.17  
7.05  
6.98  
6.96  
6.92  
6.90  
6.77

2.34  
2.29

Solvent  $\text{CDCl}_3$   
Spectrometer Frequency 400.28  
Nucleus  $^1\text{H}$

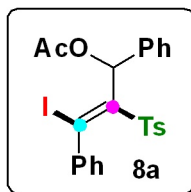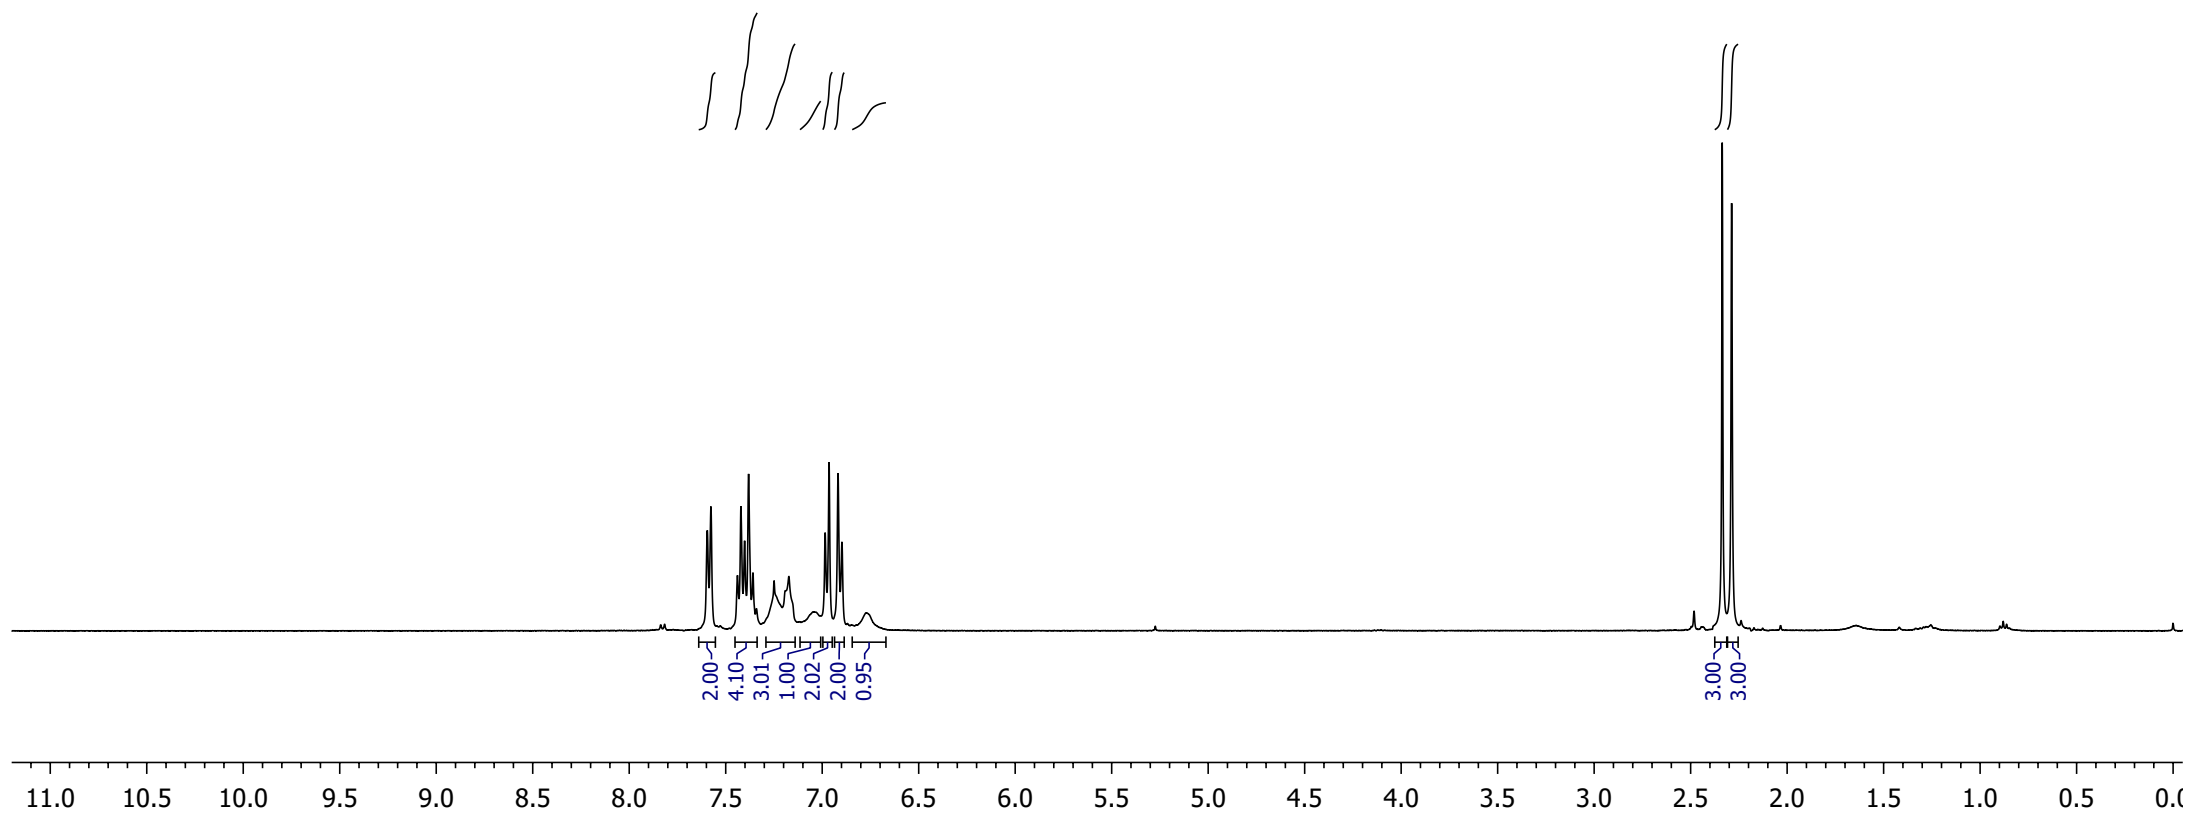

169.8

147.1  
143.6  
142.6  
137.8  
136.2  
128.8  
128.3  
127.7  
127.5  
125.9

79.5  
77.3  
77.0  
76.7

21.4  
21.0

Solvent  $\text{CDCl}_3$   
Spectrometer Frequency 100.66  
Nucleus  $^{13}\text{C}$

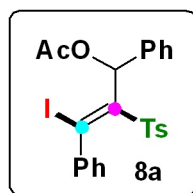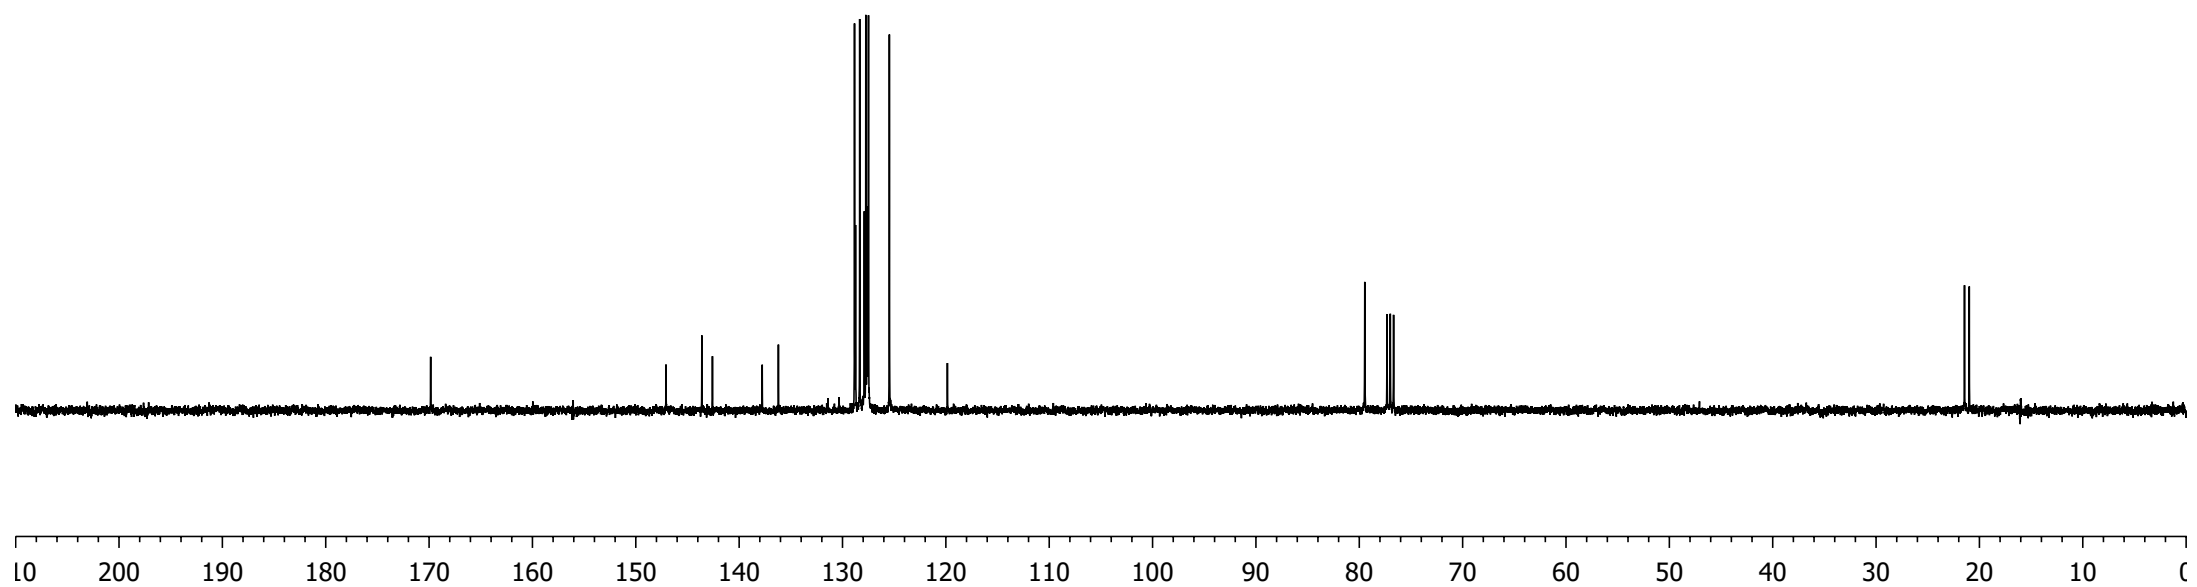

Solvent  $\text{CDCl}_3$   
Spectrometer Frequency 400.28  
Nucleus  $^1\text{H}$

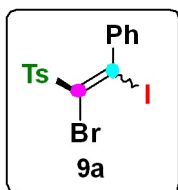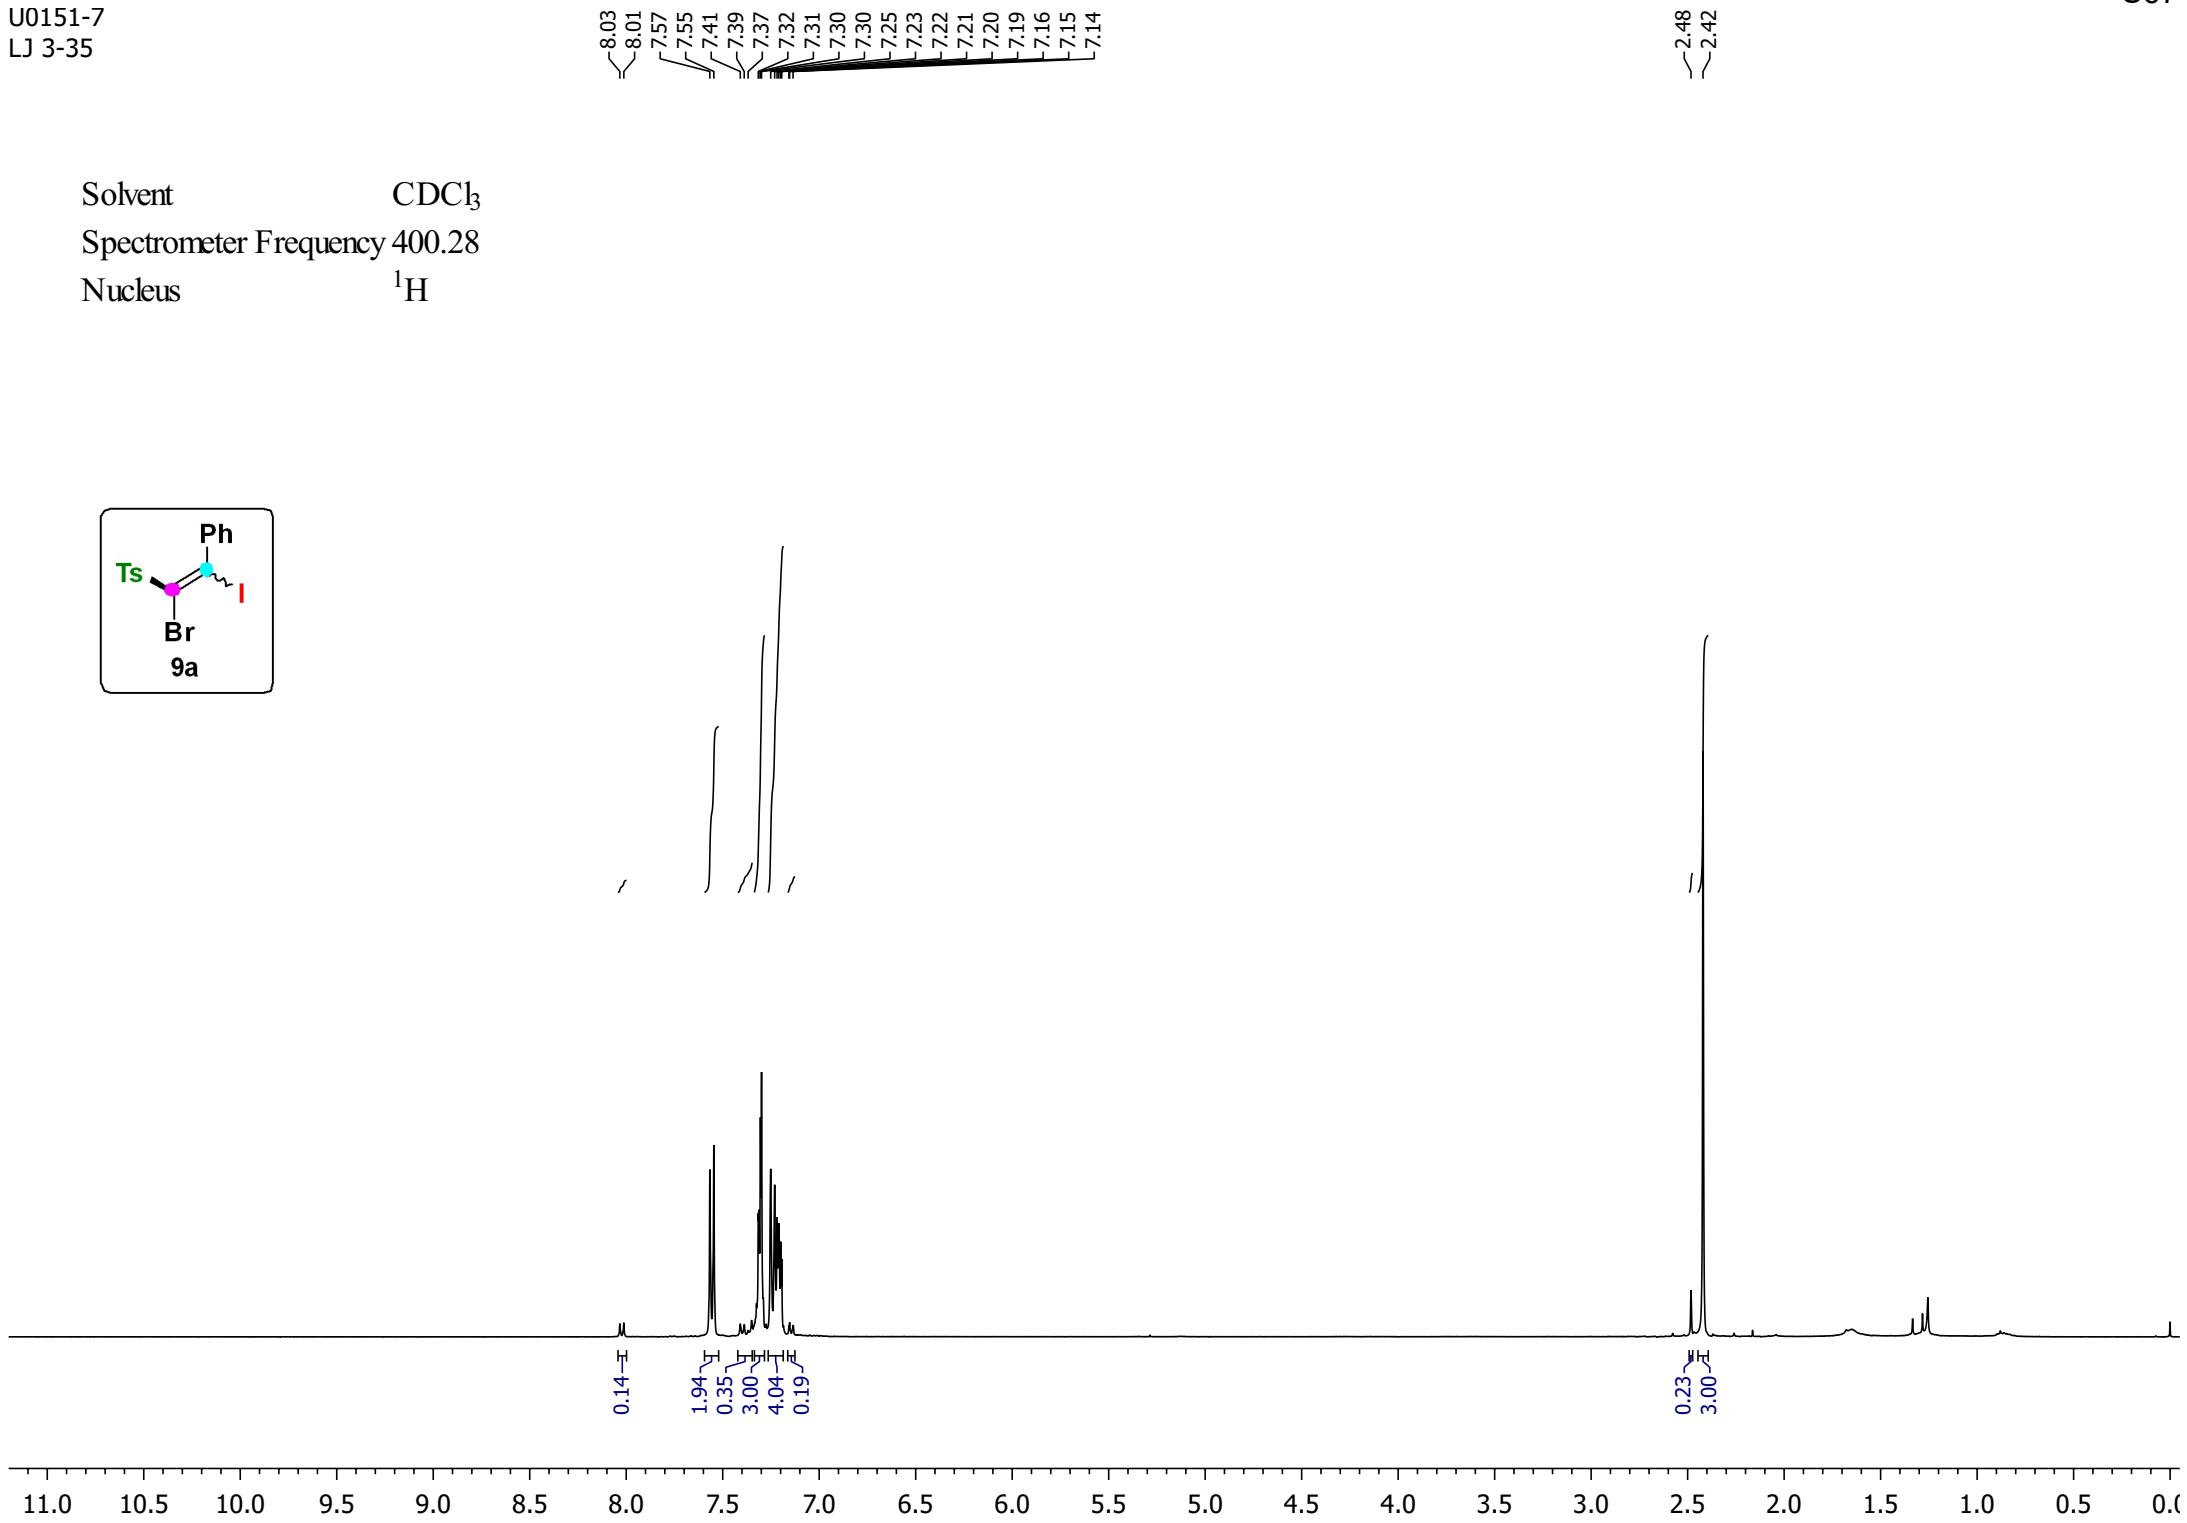

Solvent  $\text{CDCl}_3$   
Spectrometer Frequency 100.66  
Nucleus  $^{13}\text{C}$



156.0  
156.0  
145.1  
142.3  
129.8  
129.6  
129.3  
129.1  
128.7  
127.8  
127.0  
119.9

77.3  
77.0  
76.7

29.6

21.7

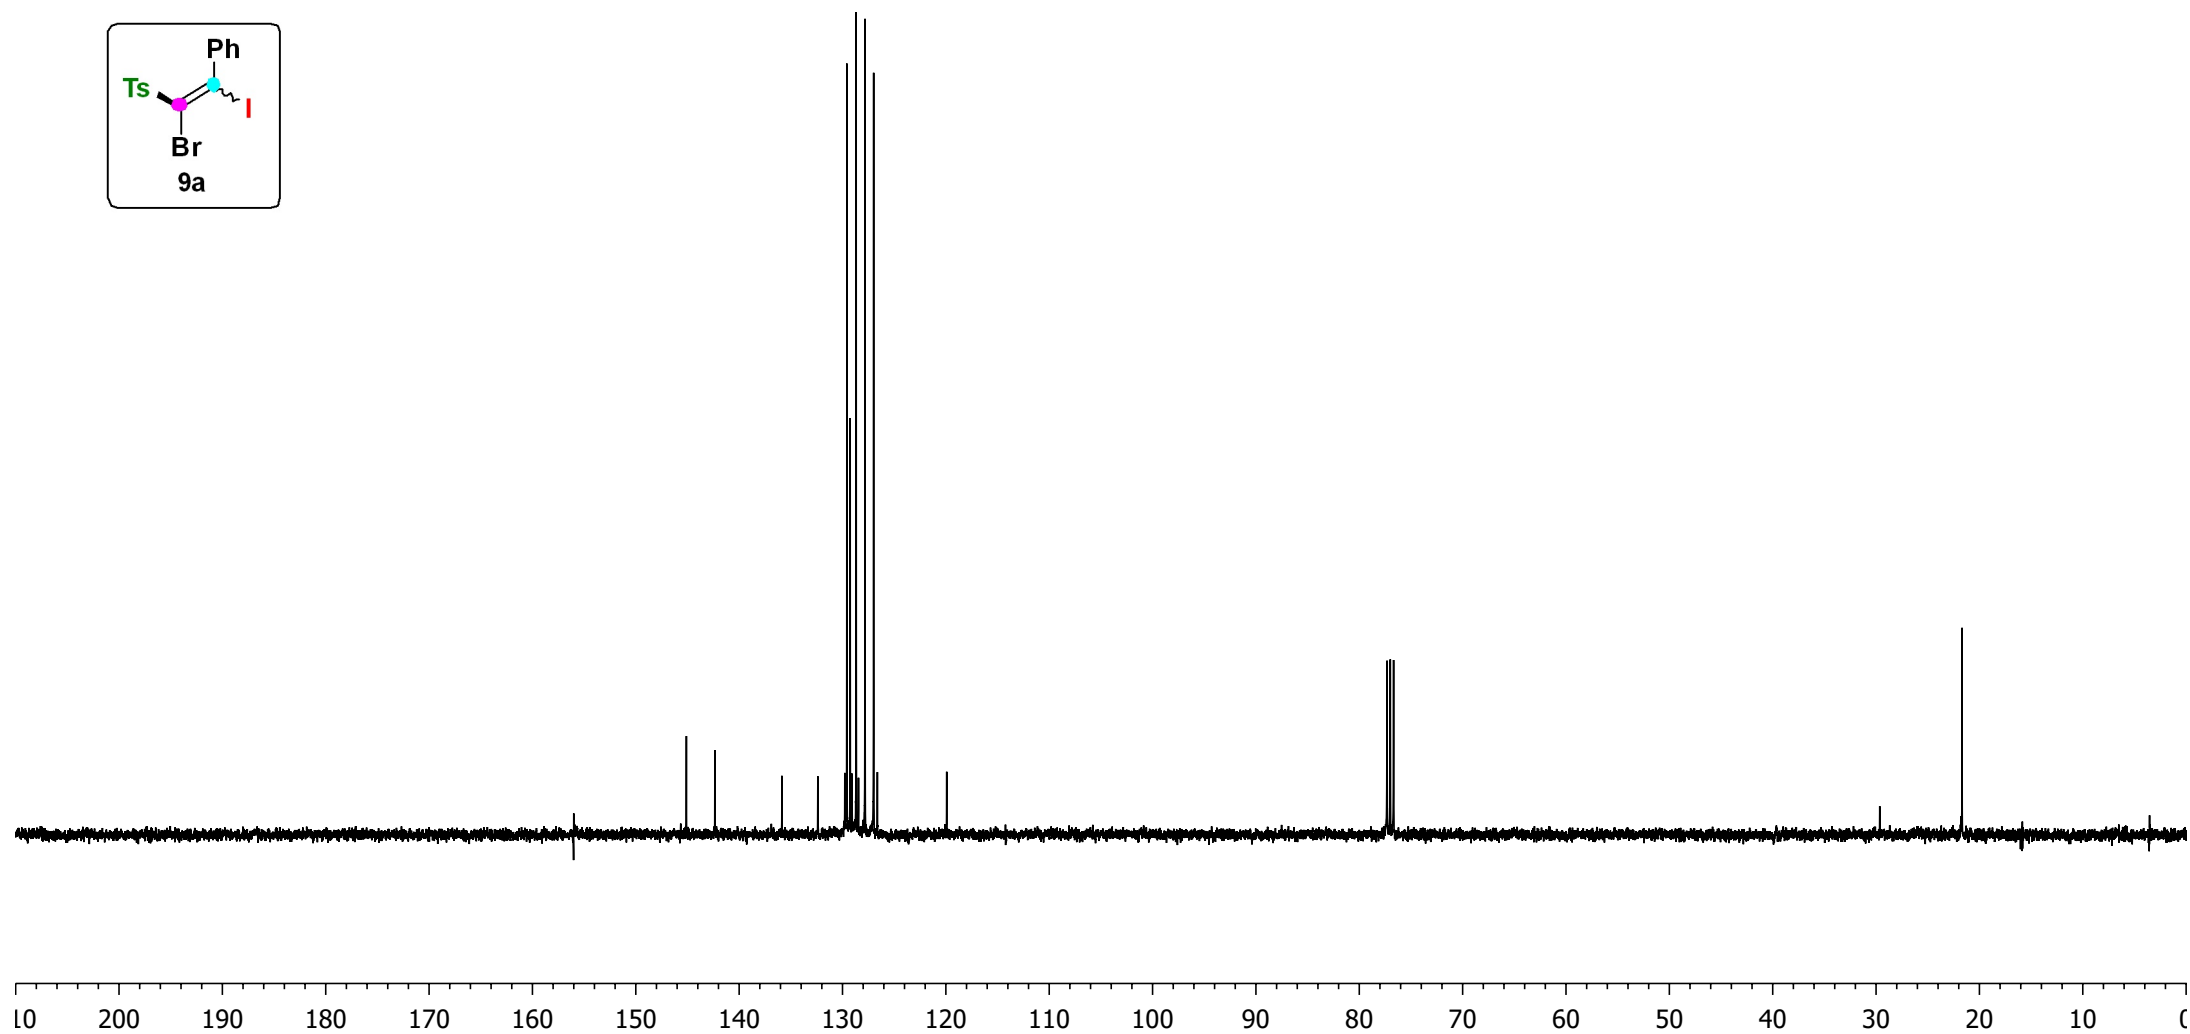

Solvent  $\text{CDCl}_3$   
Spectrometer Frequency 400.28  
Nucleus  $^1\text{H}$

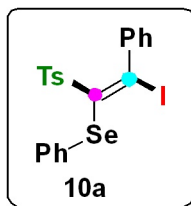

7.50  
7.50  
7.49  
7.49  
7.48  
7.46  
7.44  
7.30  
7.29  
7.29  
7.26  
7.26  
7.25  
7.20  
7.19  
7.19  
7.18  
7.17  
7.10  
7.08

2.36

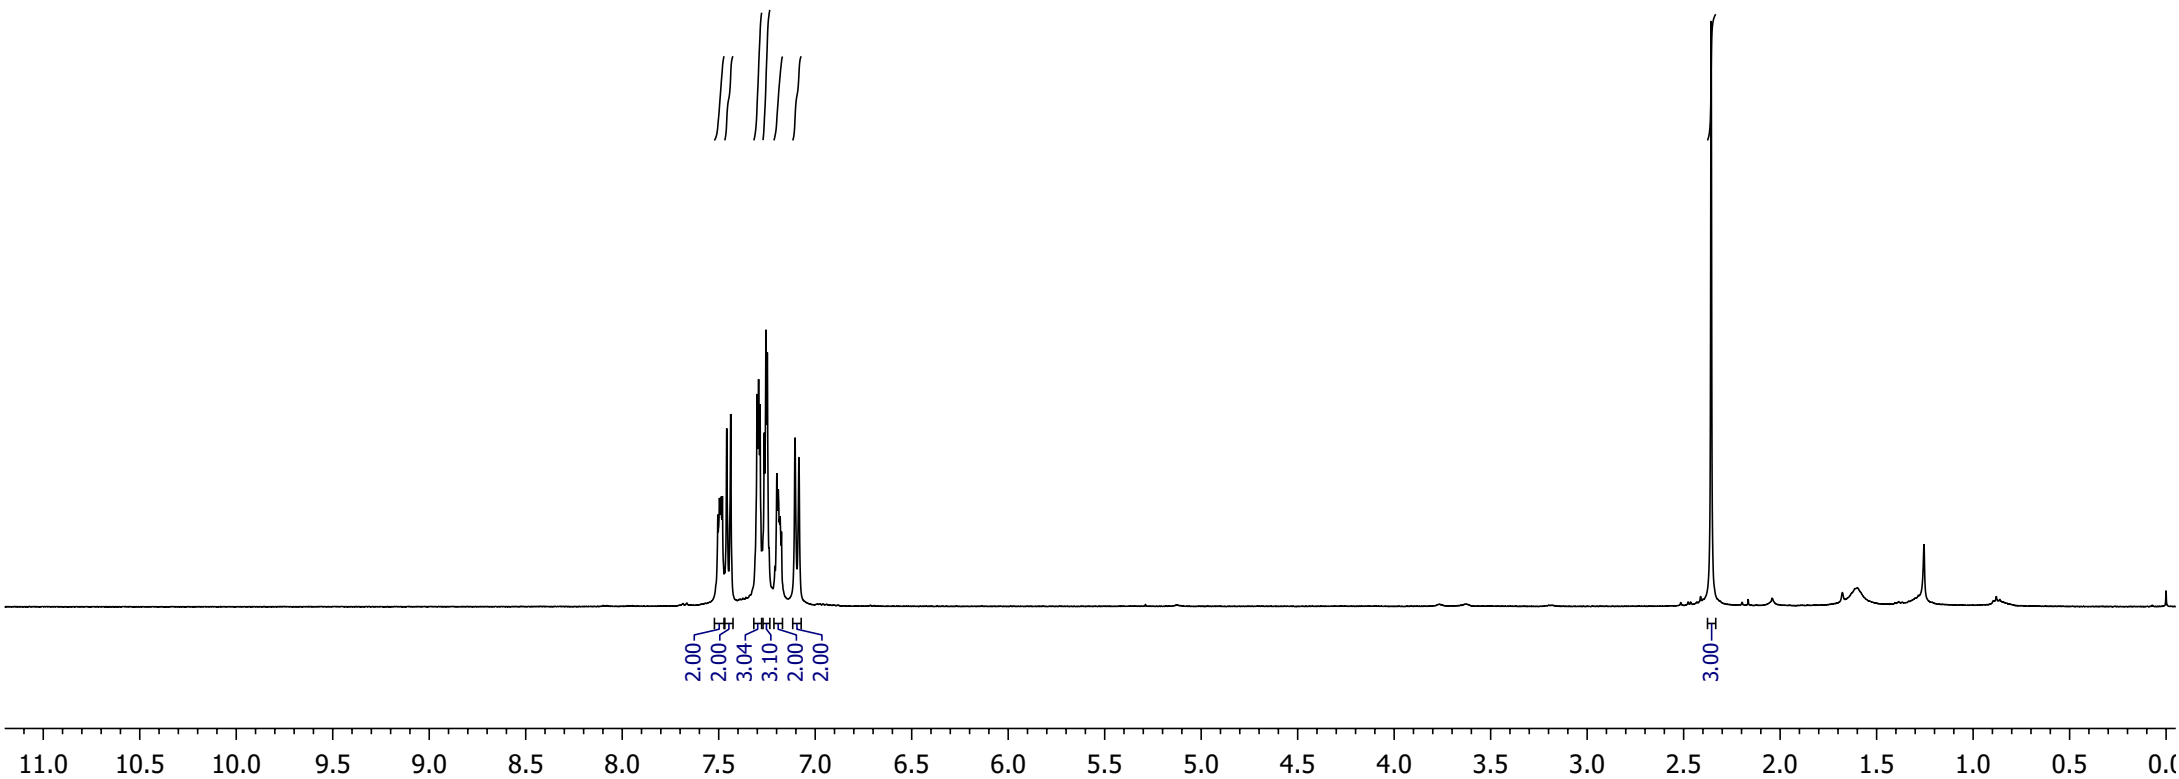

144.9  
144.2  
143.9  
136.6  
131.6  
131.5  
131.3  
129.4  
129.2  
129.1  
128.6  
127.8  
127.0

77.3  
77.0  
76.7

21.6

Solvent  $\text{CDCl}_3$   
Spectrometer Frequency 100.66  
Nucleus  $^{13}\text{C}$

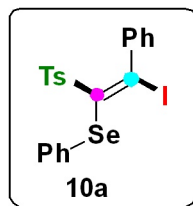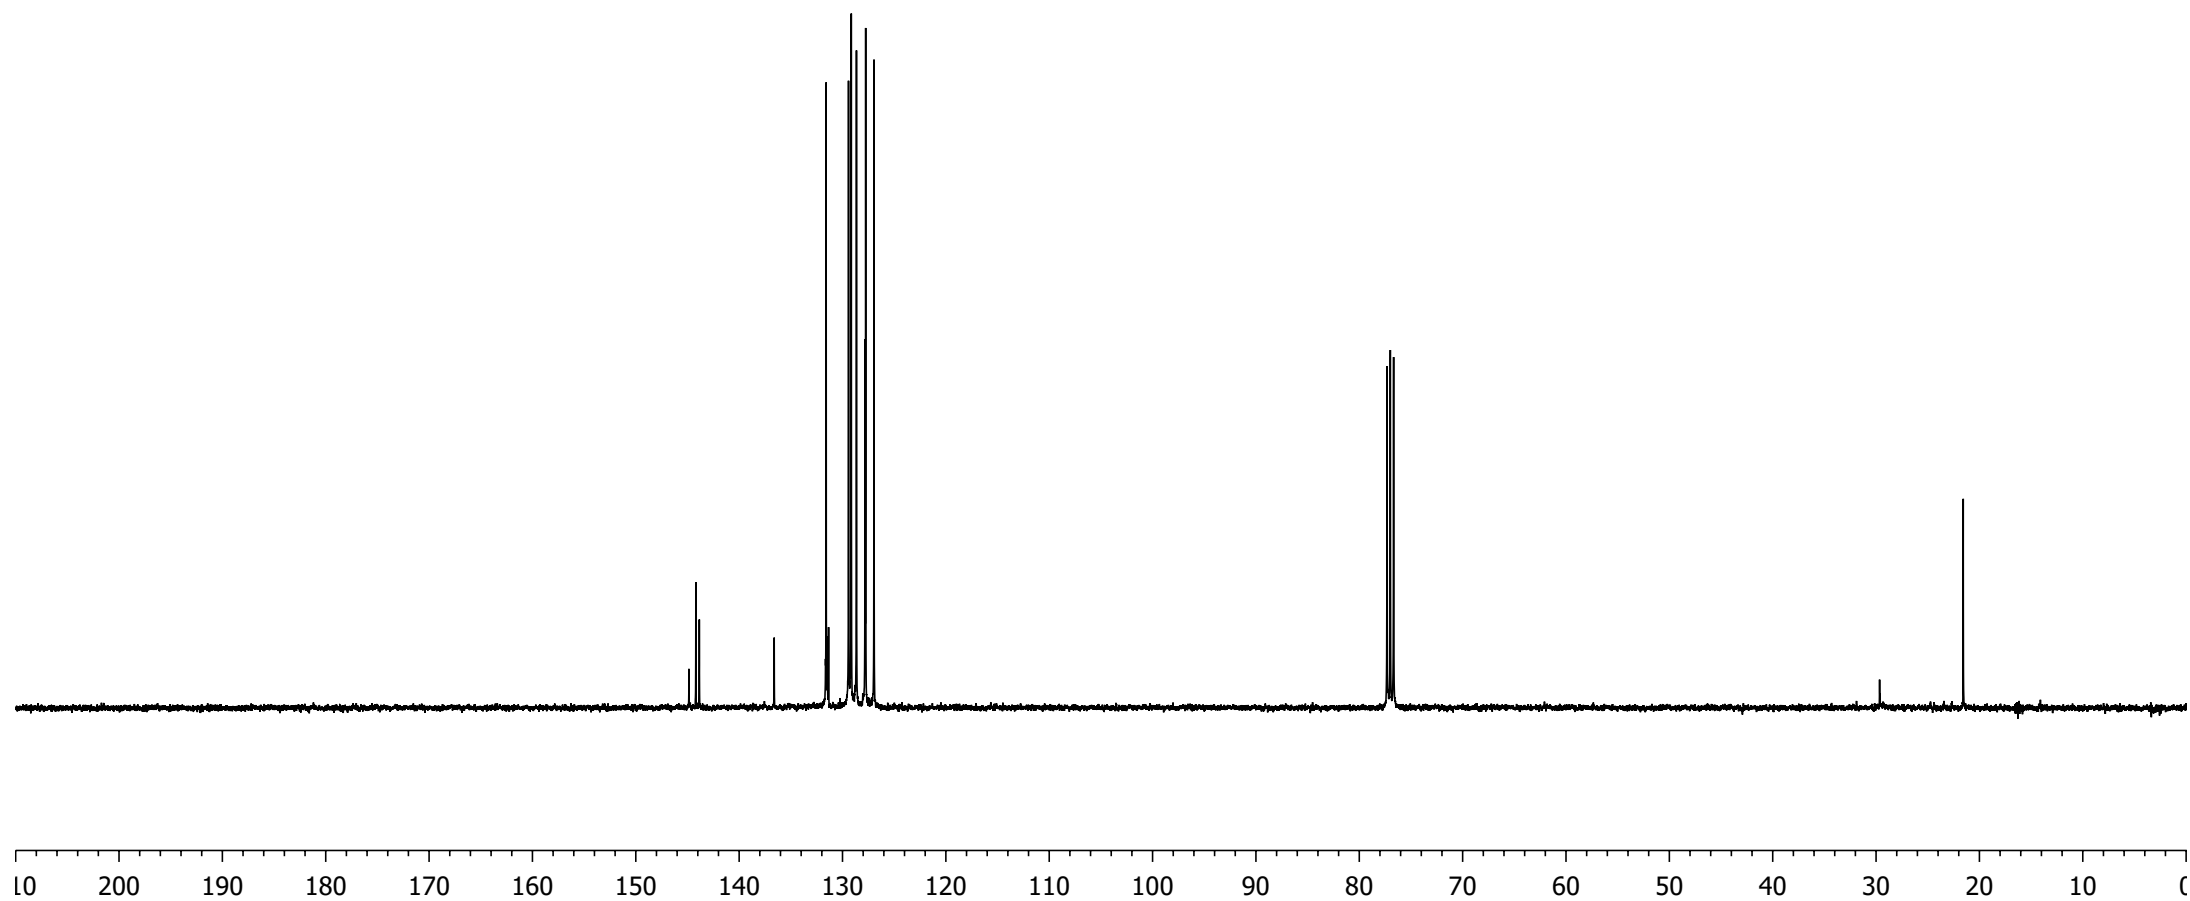

U0131-1  
LJ3-36

7.97  
7.95  
7.53  
7.51  
7.51  
7.49  
7.47  
7.47  
7.45  
7.45  
7.40  
7.39  
7.38  
7.37  
7.35  
7.26

2.47

S71  
0.00

Solvent  $\text{CDCl}_3$   
Spectrometer Frequency 400.28  
Nucleus  $^1\text{H}$

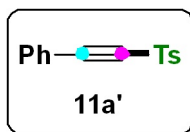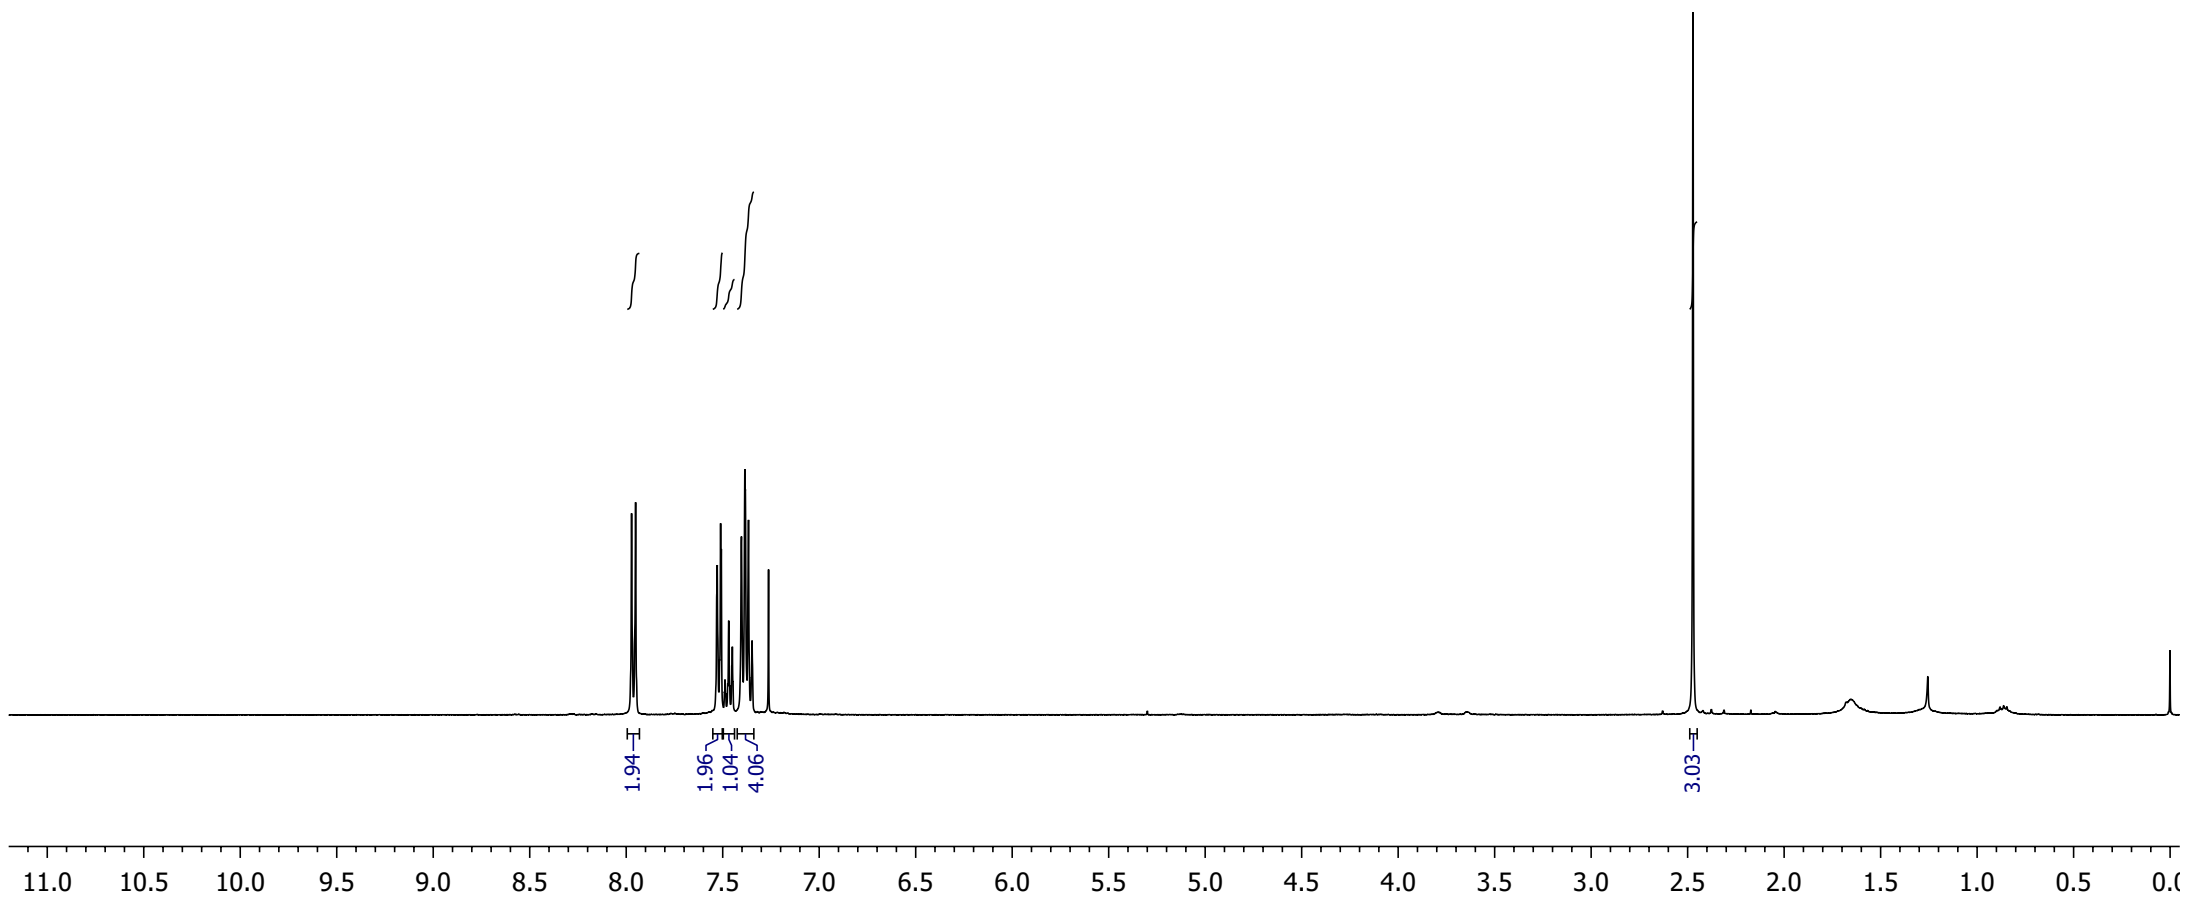

U0131-2  
LJ3-36

S72

—145.3 —138.9 —132.7 —131.4 —130.0 —128.6 —127.5 —118.0 —92.9 —85.6 —77.3 —77.0 —76.7 —21.7

Solvent  $\text{CDCl}_3$   
Spectrometer Frequency 100.66  
Nucleus  $^{13}\text{C}$

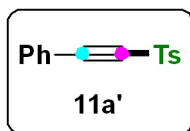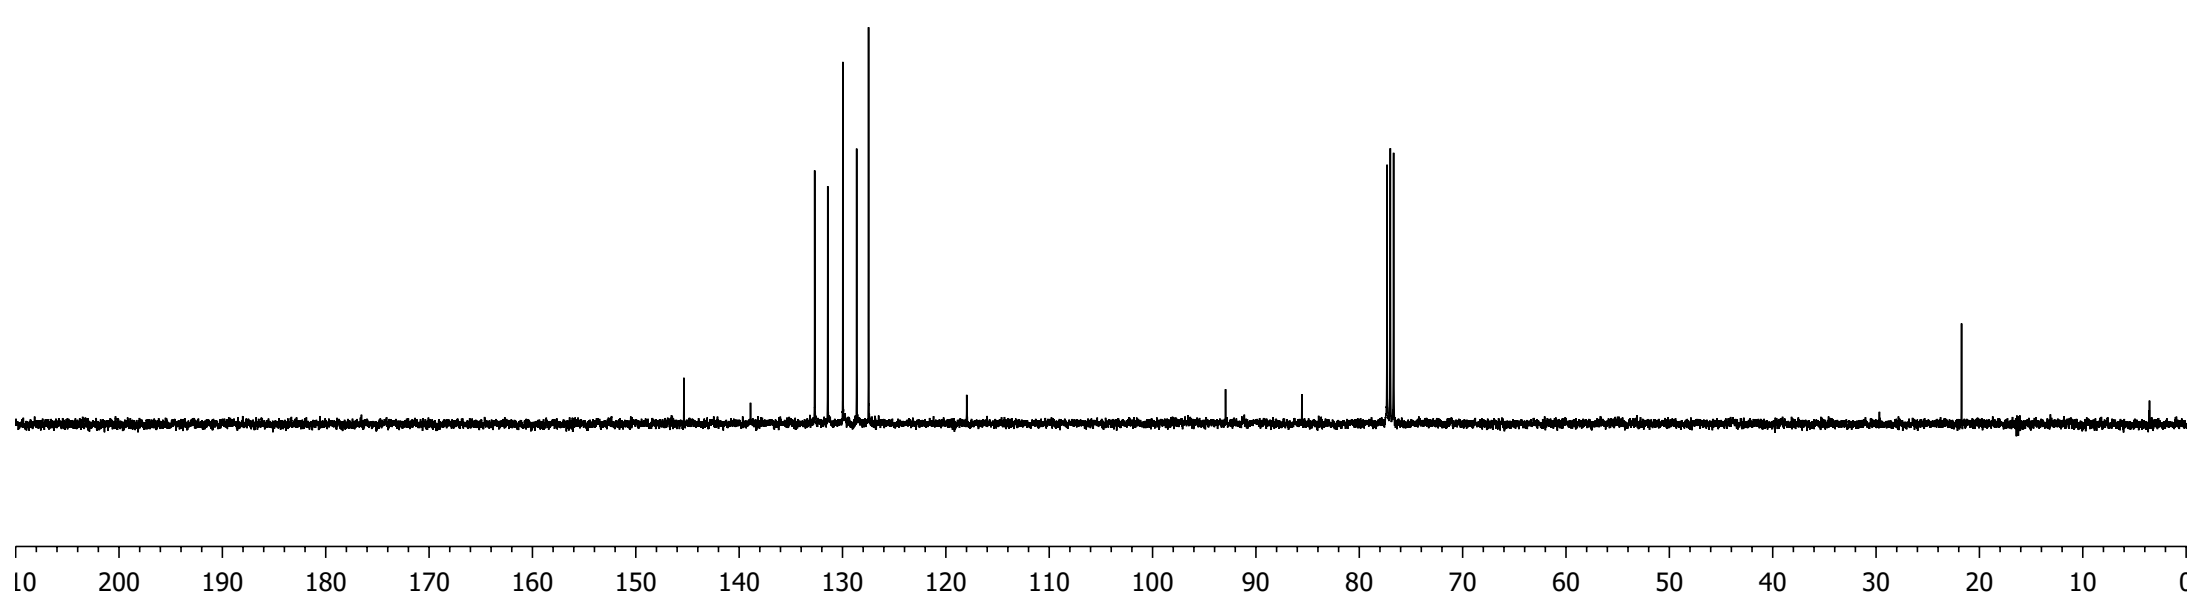



Solvent  $\text{CDCl}_3$   
Spectrometer Frequency 400.28  
Nucleus  $^1\text{H}$

7.28  
7.26  
7.19  
7.18  
7.17  
7.16  
7.15  
7.15  
7.15  
7.14  
7.12  
7.12  
7.11  
7.10  
7.10  
7.06  
7.04  
6.98  
6.97

4.08  
4.06  
4.04

3.28  
3.26  
3.24

2.41  
2.35

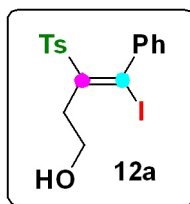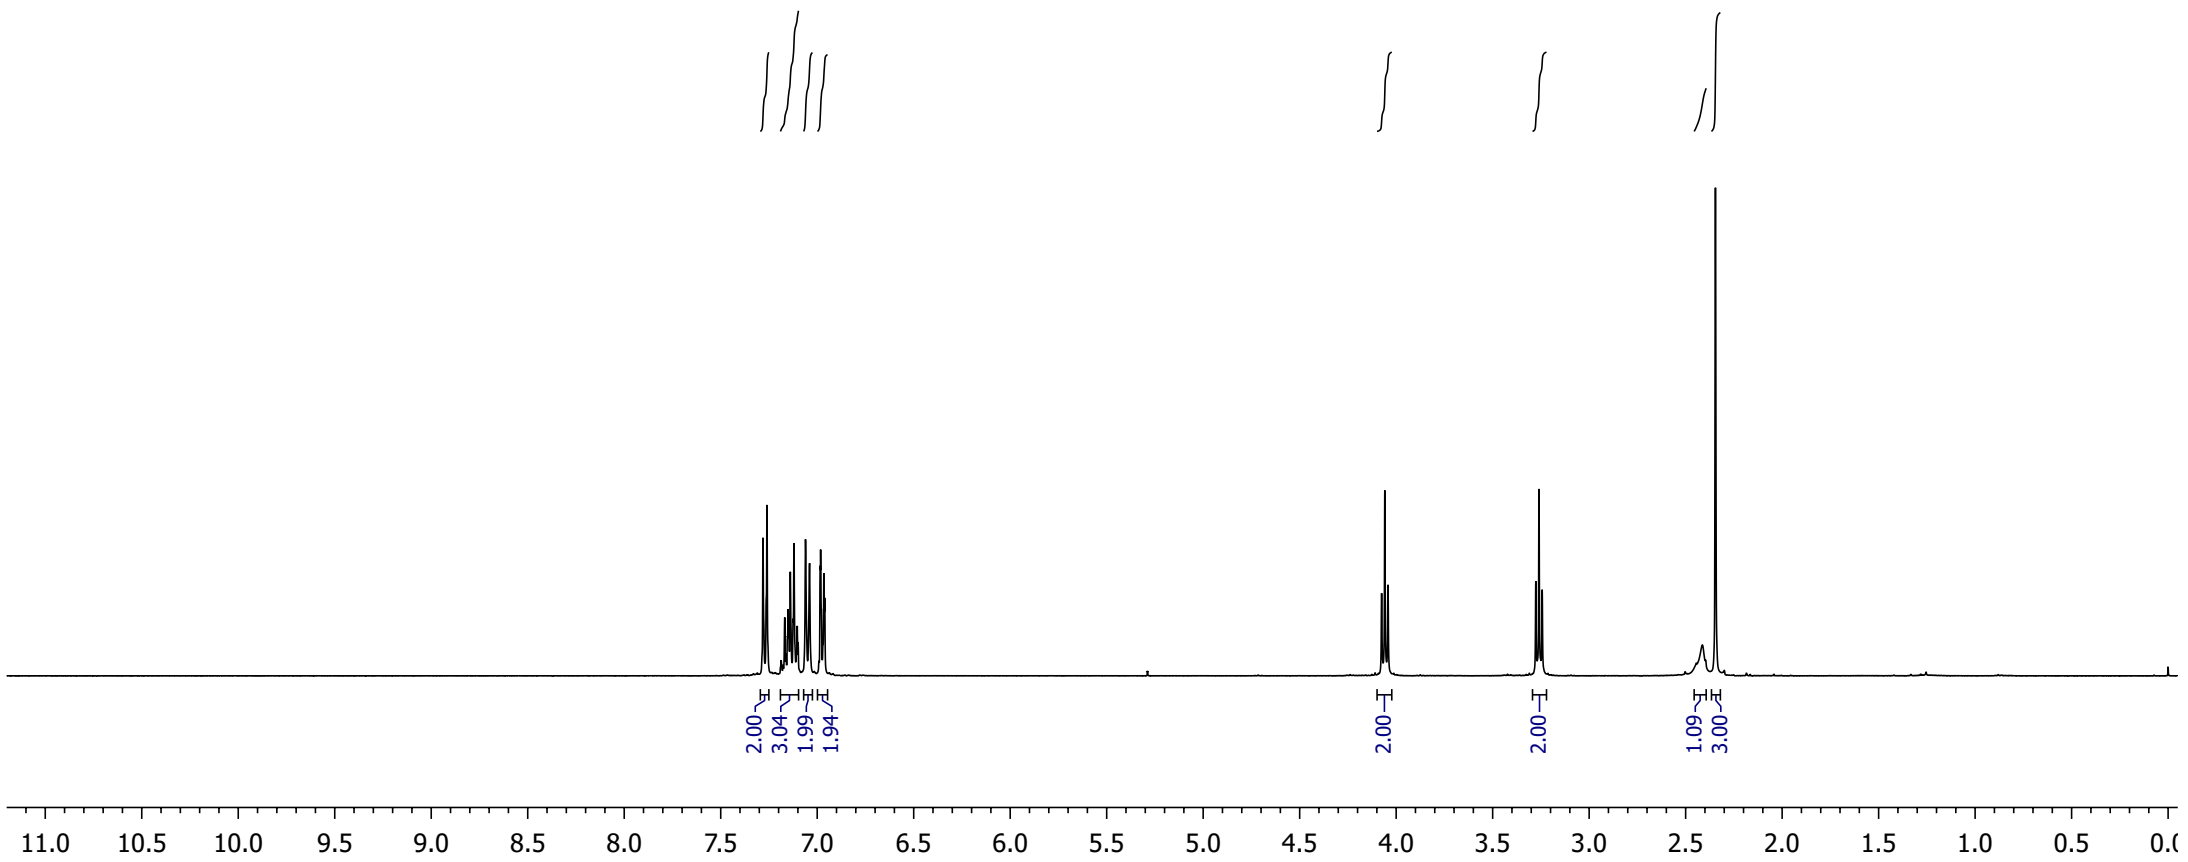

146.1  
143.9  
142.4  
137.2  
129.3  
128.6  
127.6  
127.5  
117.4  
77.3  
77.0  
76.7  
60.9  
42.1  
21.5

Solvent  $\text{CDCl}_3$   
Spectrometer Frequency 100.66  
Nucleus  $^{13}\text{C}$

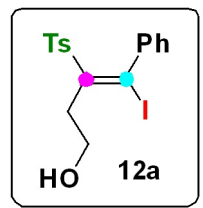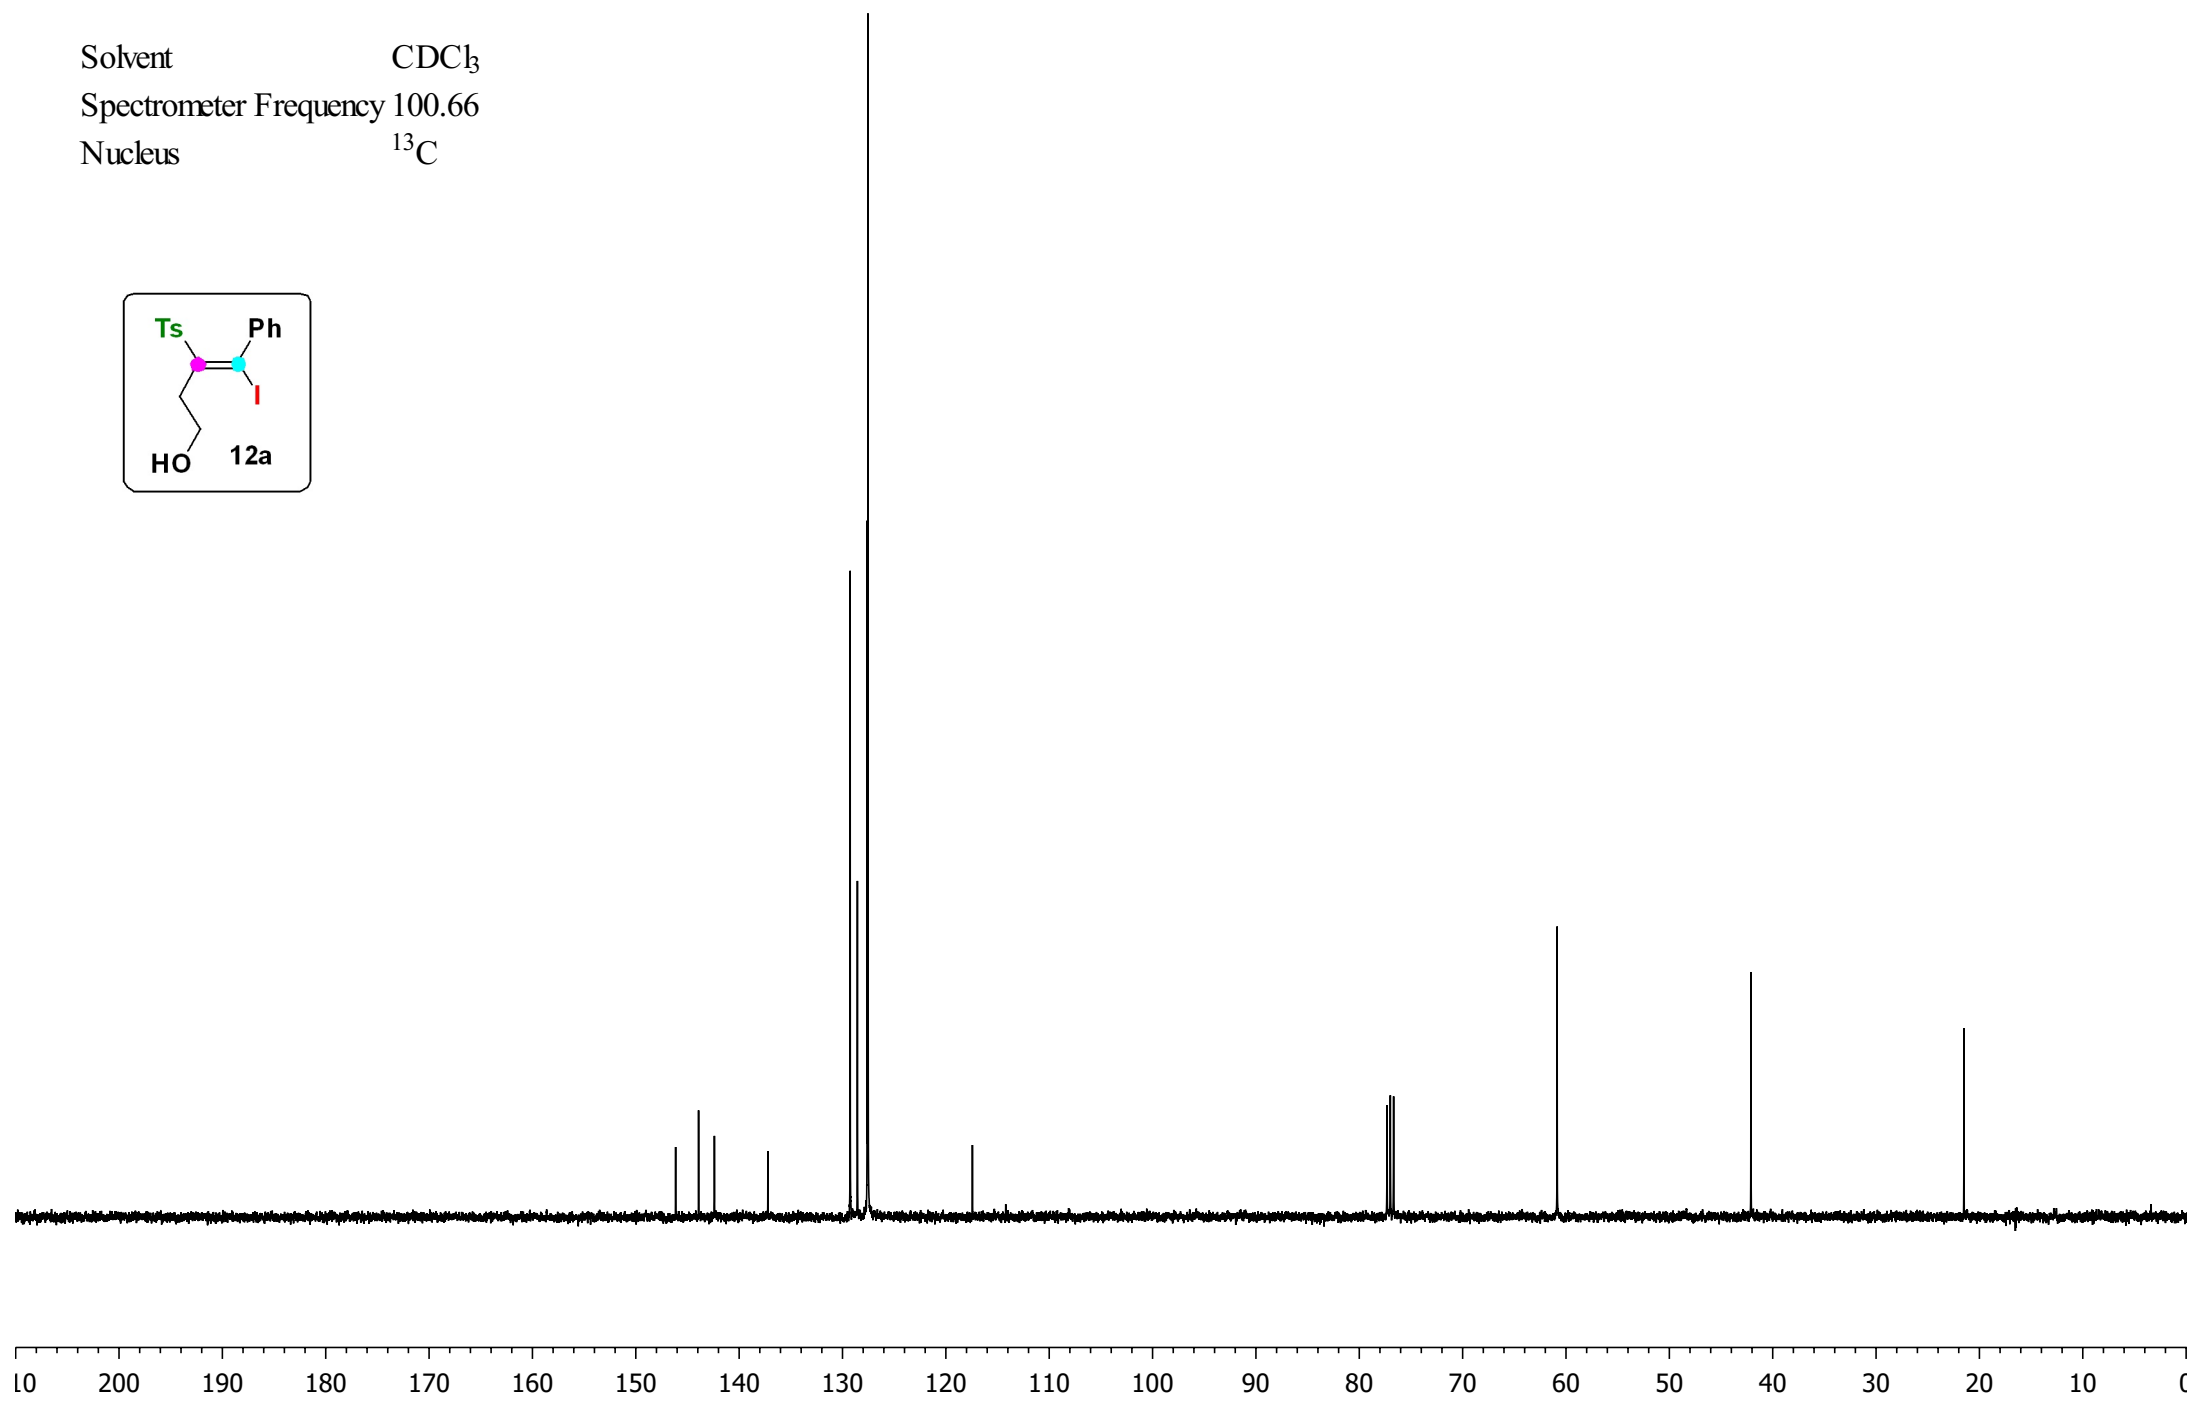

Solvent  $\text{CDCl}_3$   
Spectrometer Frequency 400.40  
Nucleus  $^1\text{H}$

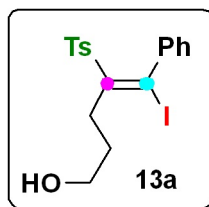

7.25  
7.23  
7.20  
7.18  
7.16  
7.14  
7.13  
7.08  
7.06  
7.00  
6.98

3.83  
3.81  
3.80

3.05  
3.04  
3.02

2.35  
2.16  
2.09  
2.07  
2.05

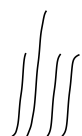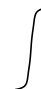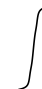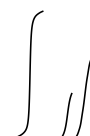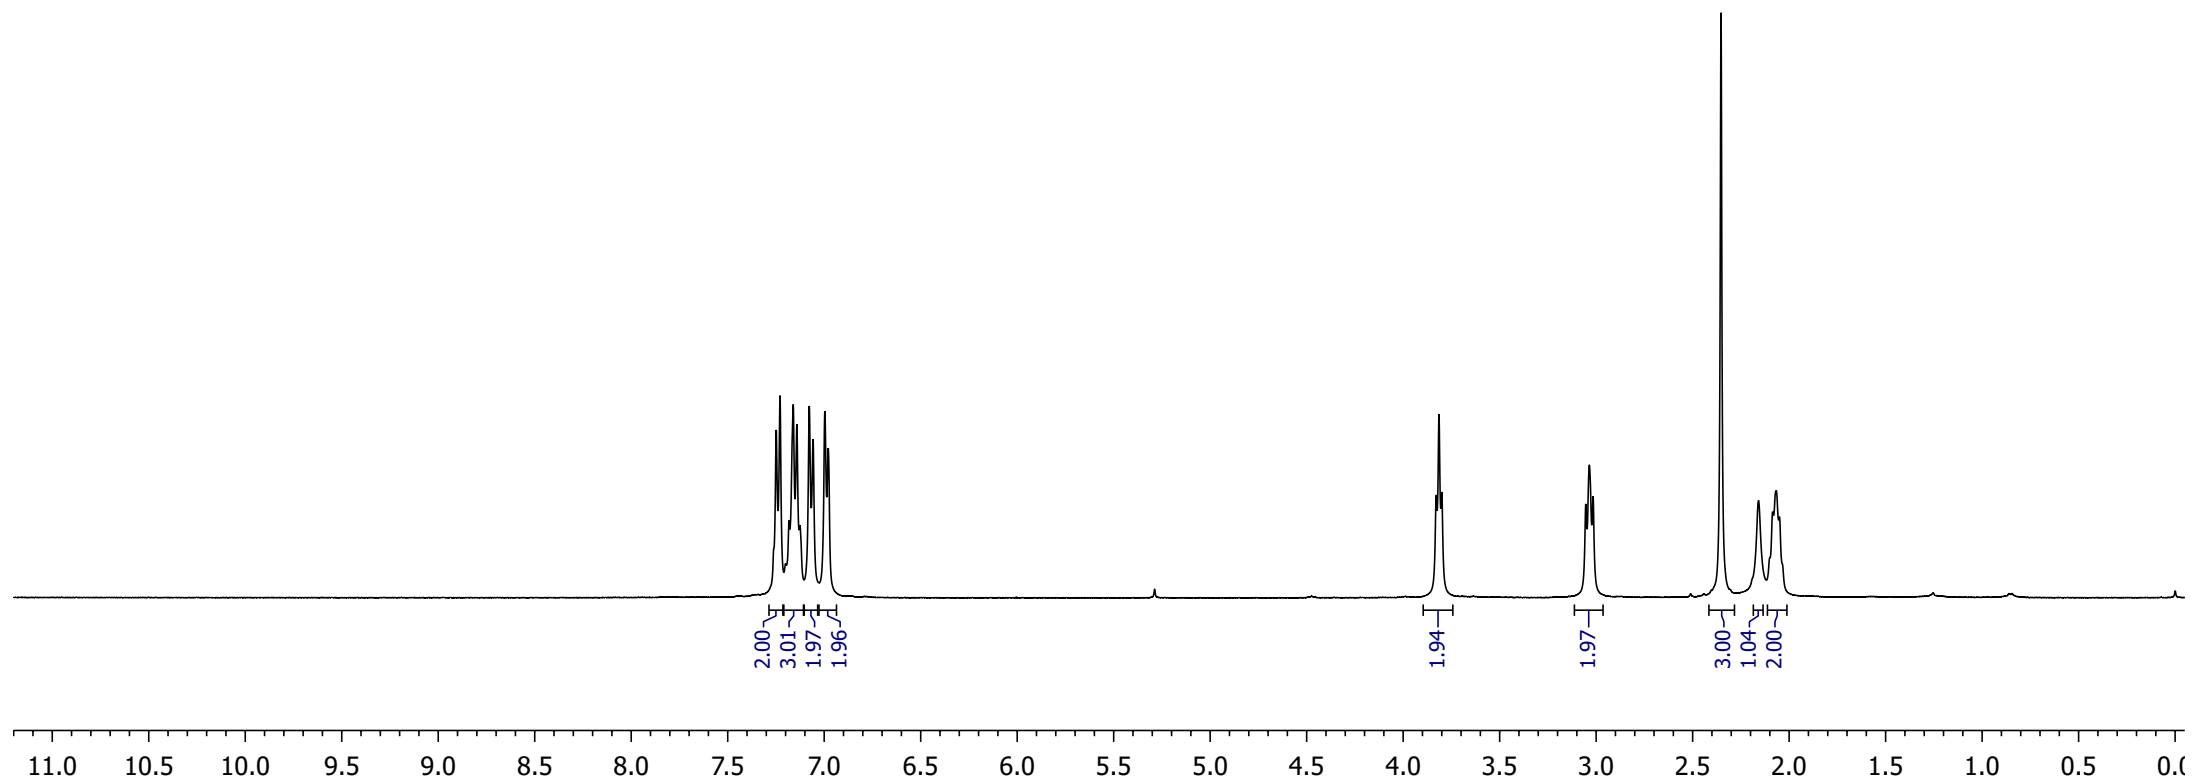

148.3  
143.9  
142.6  
137.4  
129.3  
128.5  
127.7  
127.5  
127.5  
116.0

77.3  
77.0  
76.7

61.8

36.1

31.2

21.5

Solvent  $\text{CDCl}_3$   
Spectrometer Frequency 100.69  
Nucleus  $^{13}\text{C}$

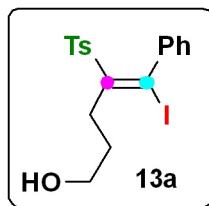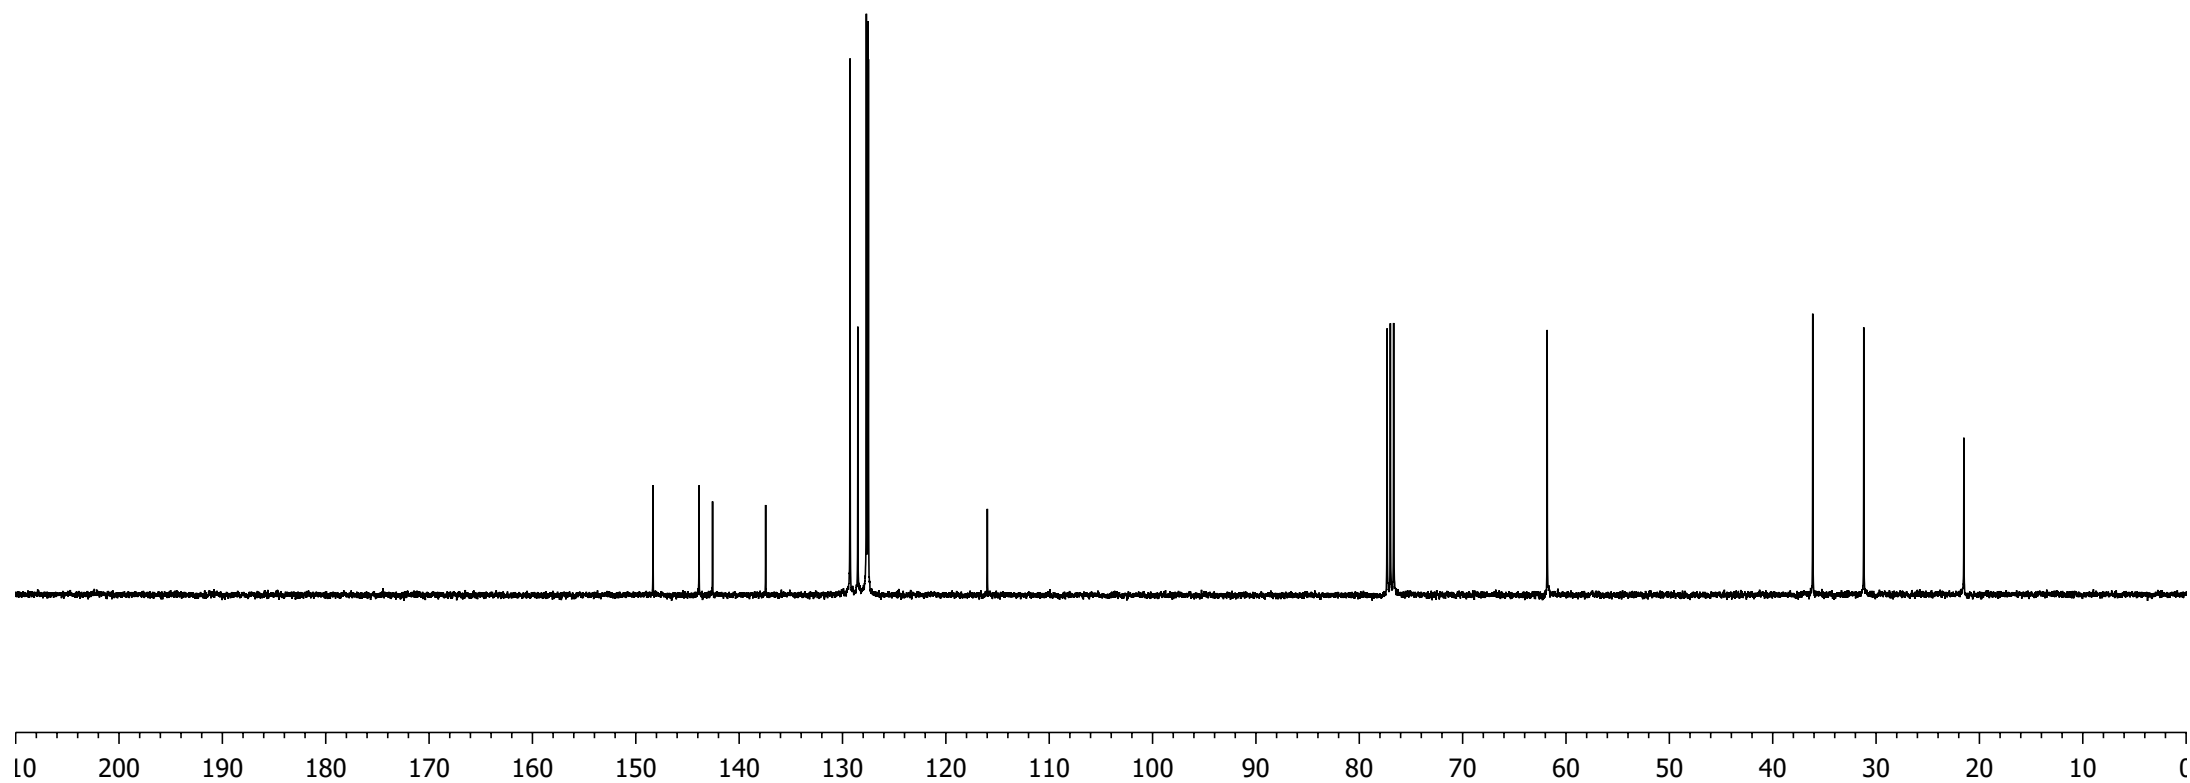

Solvent  $\text{CDCl}_3$   
Spectrometer Frequency 597.22  
Nucleus  $^1\text{H}$

7.31  
7.29  
7.26  
7.25  
7.24  
7.24  
7.23  
7.21  
7.20  
7.19  
7.12  
7.10  
7.06  
7.05

5.29

2.37

2.11

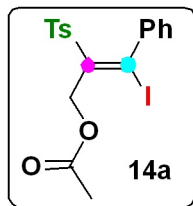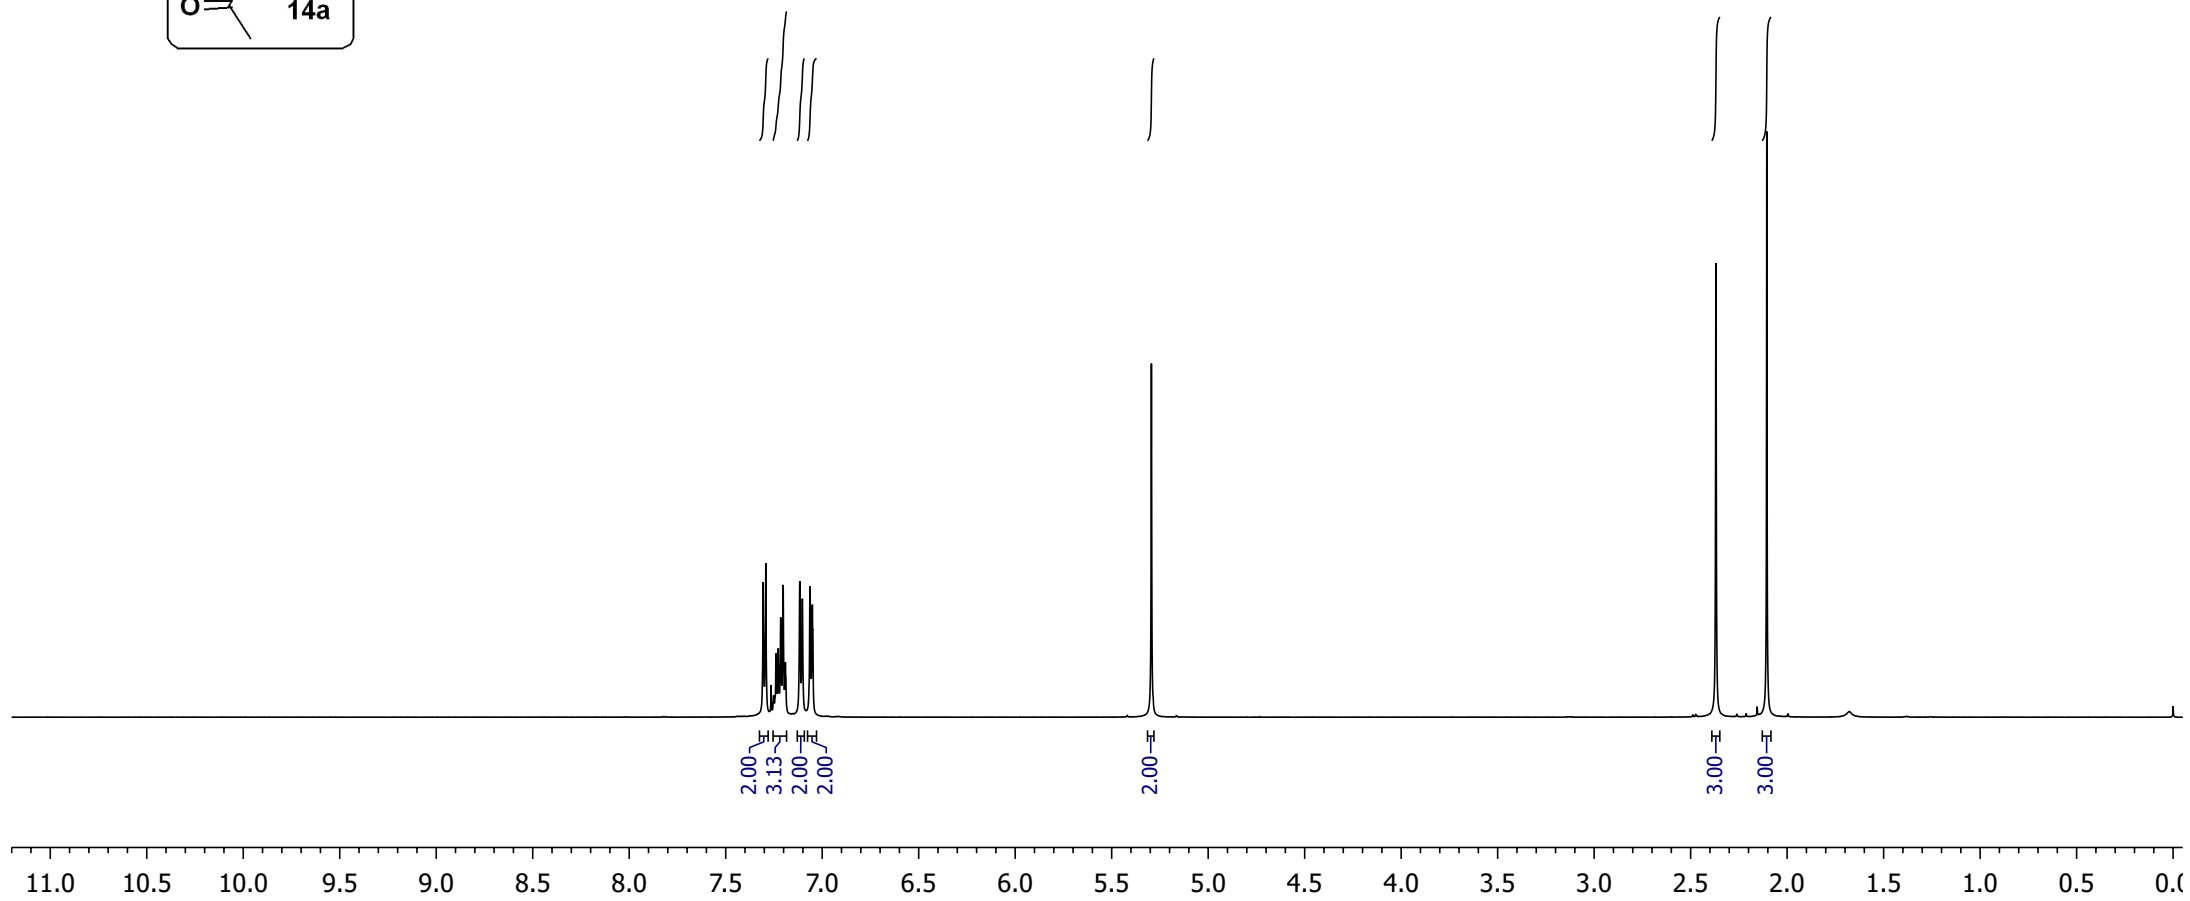

V0035-10  
LJ3-21

—170.1

144.2  
143.6  
142.0  
137.2  
129.3  
129.1  
127.8  
127.6  
127.2  
123.577.2  
77.0  
76.8

—68.9

21.5  
20.6Solvent  $\text{CDCl}_3$   
Spectrometer Frequency 150.19  
Nucleus  $^{13}\text{C}$ 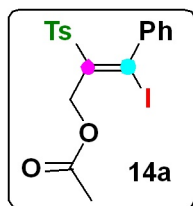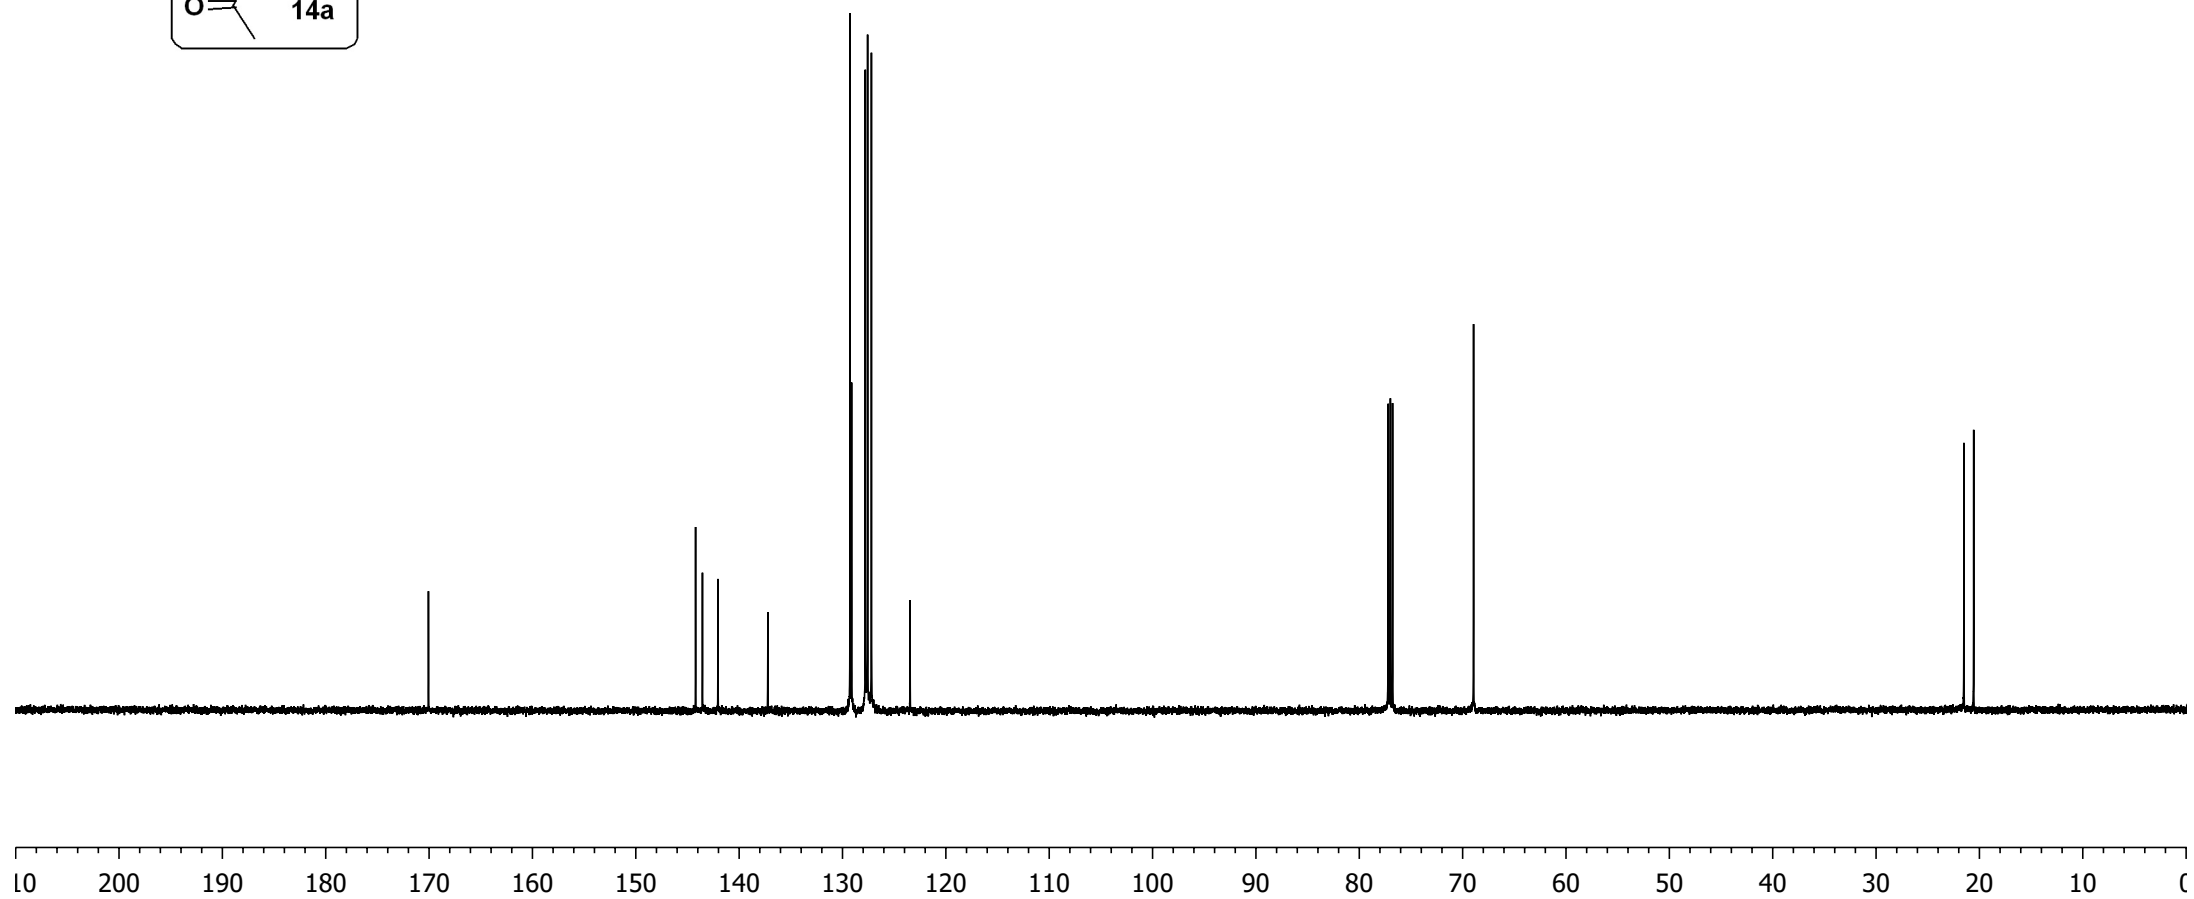

Solvent  $\text{CDCl}_3$   
Spectrometer Frequency 400.28  
Nucleus  $^1\text{H}$

7.90  
7.88  
7.39  
7.37  
7.26  
7.24  
7.22  
7.21  
7.18  
7.17  
7.15  
7.07  
7.05  
6.95  
6.93

5.25

2.45  
2.36

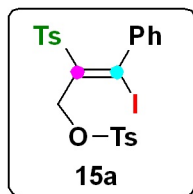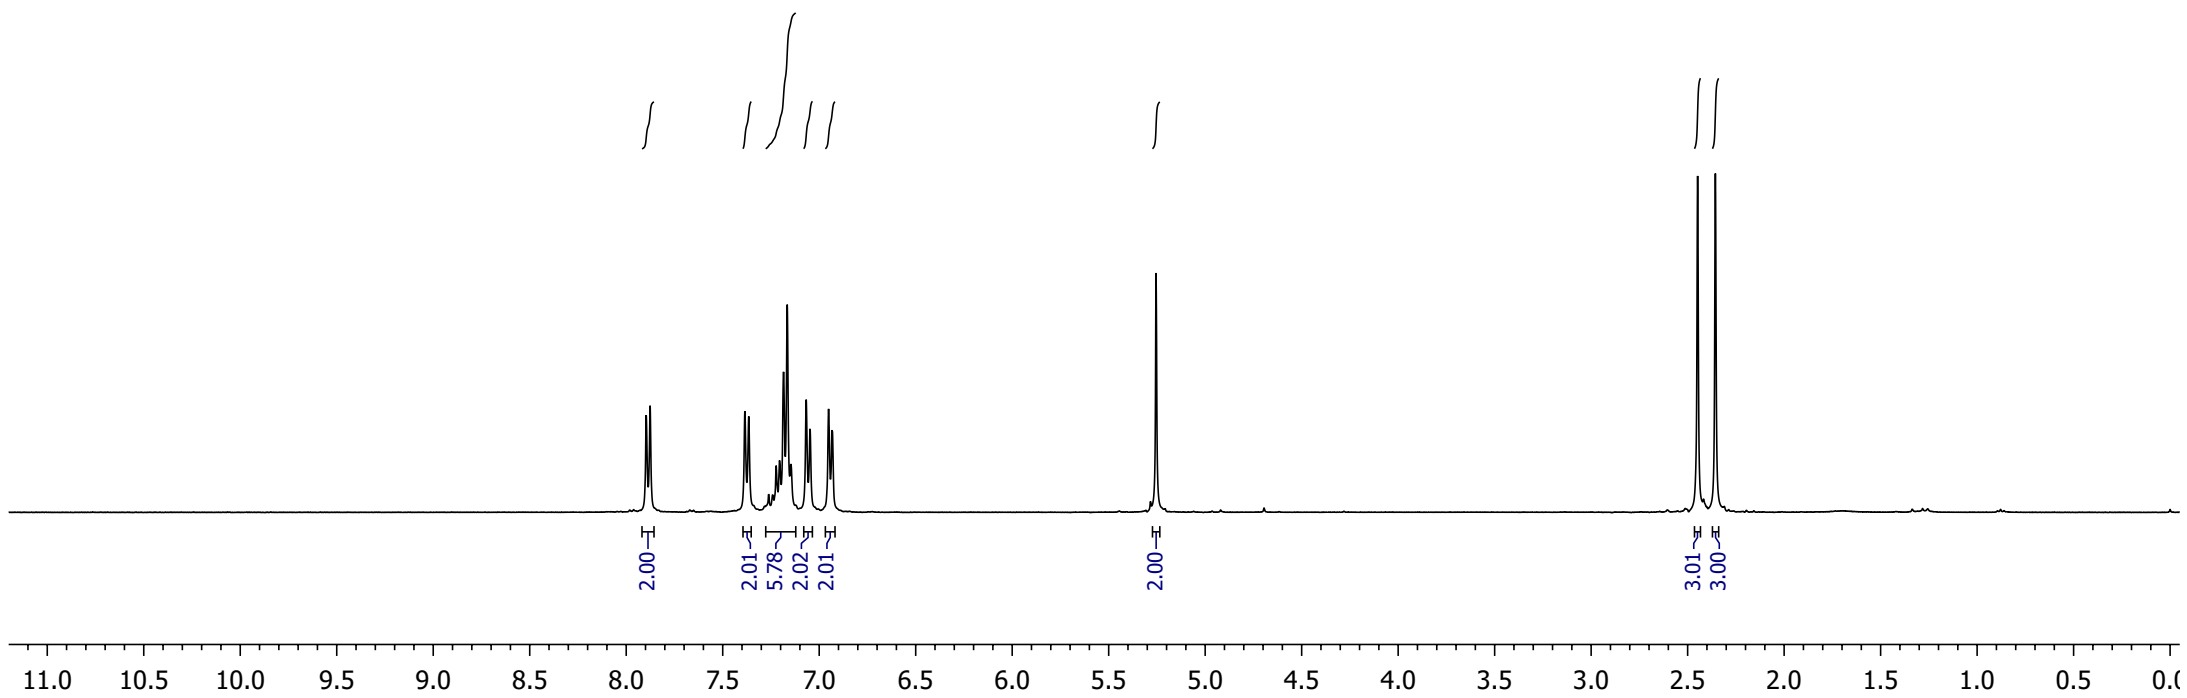

Solvent  $\text{CDCl}_3$   
Spectrometer Frequency 100.66  
Nucleus  $^{13}\text{C}$

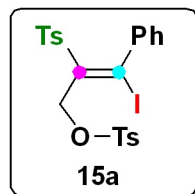

145.2  
144.4  
142.0  
141.7  
136.7  
132.1  
129.8  
129.3  
128.3  
127.8  
127.5  
127.0  
126.3

77.3  
77.0  
76.7  
73.3

21.7  
21.5

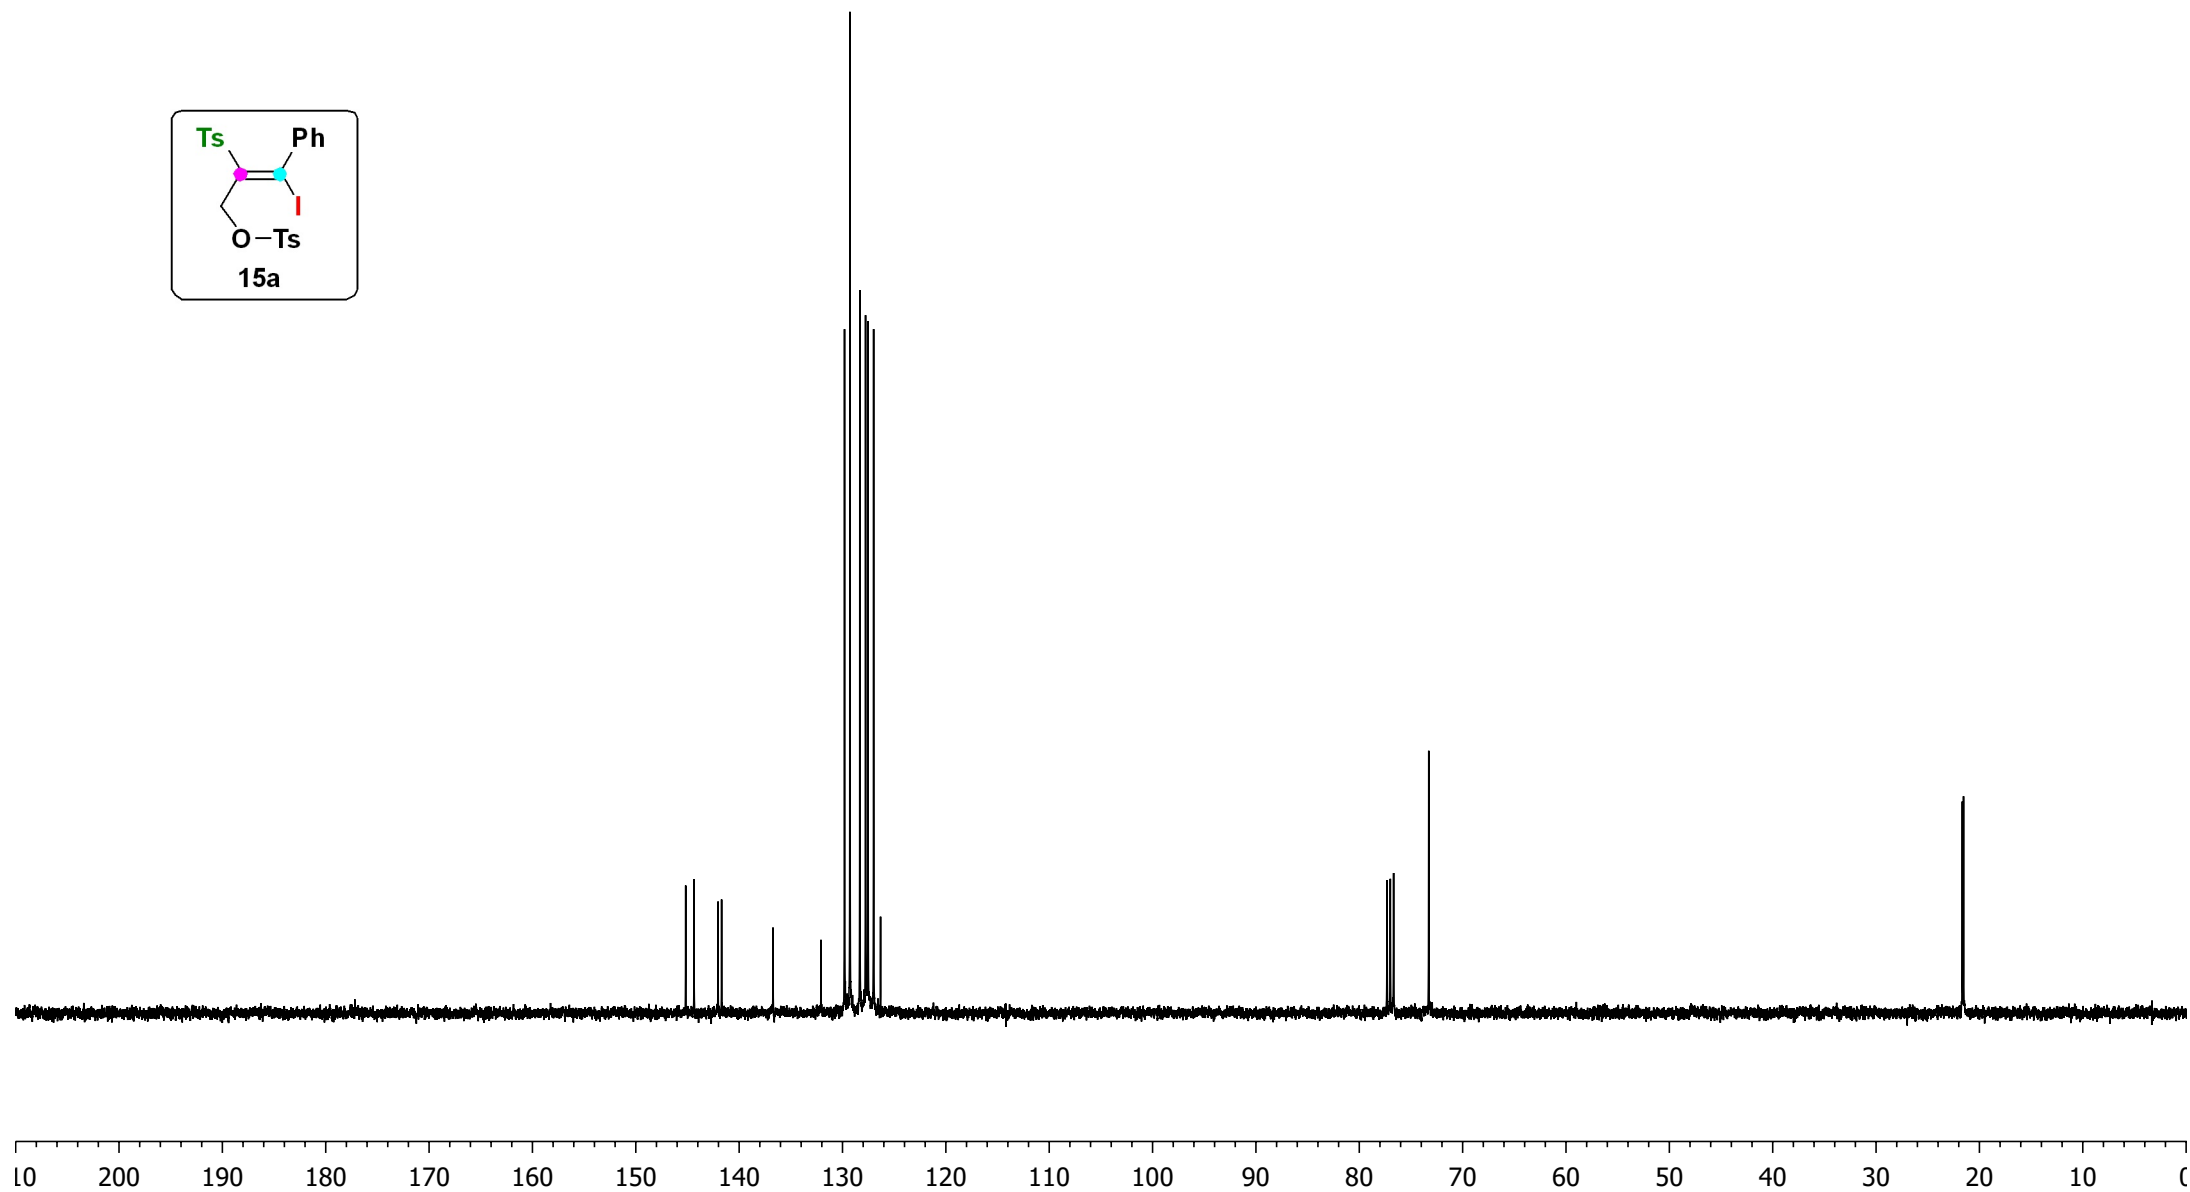



Solvent  $\text{CDCl}_3$   
Spectrometer Frequency 400.28  
Nucleus  $^1\text{H}$

7.26  
7.24  
7.22  
7.19  
7.18  
7.17  
7.16  
7.16  
7.15  
7.15  
7.13  
7.13  
7.12  
7.12  
7.11  
7.07  
7.05  
7.00  
6.98

2.92  
2.90  
2.88  
2.35  
1.78  
1.76  
1.75  
1.74  
1.52  
1.50  
1.48  
1.46  
1.00  
0.98

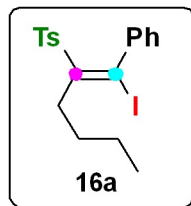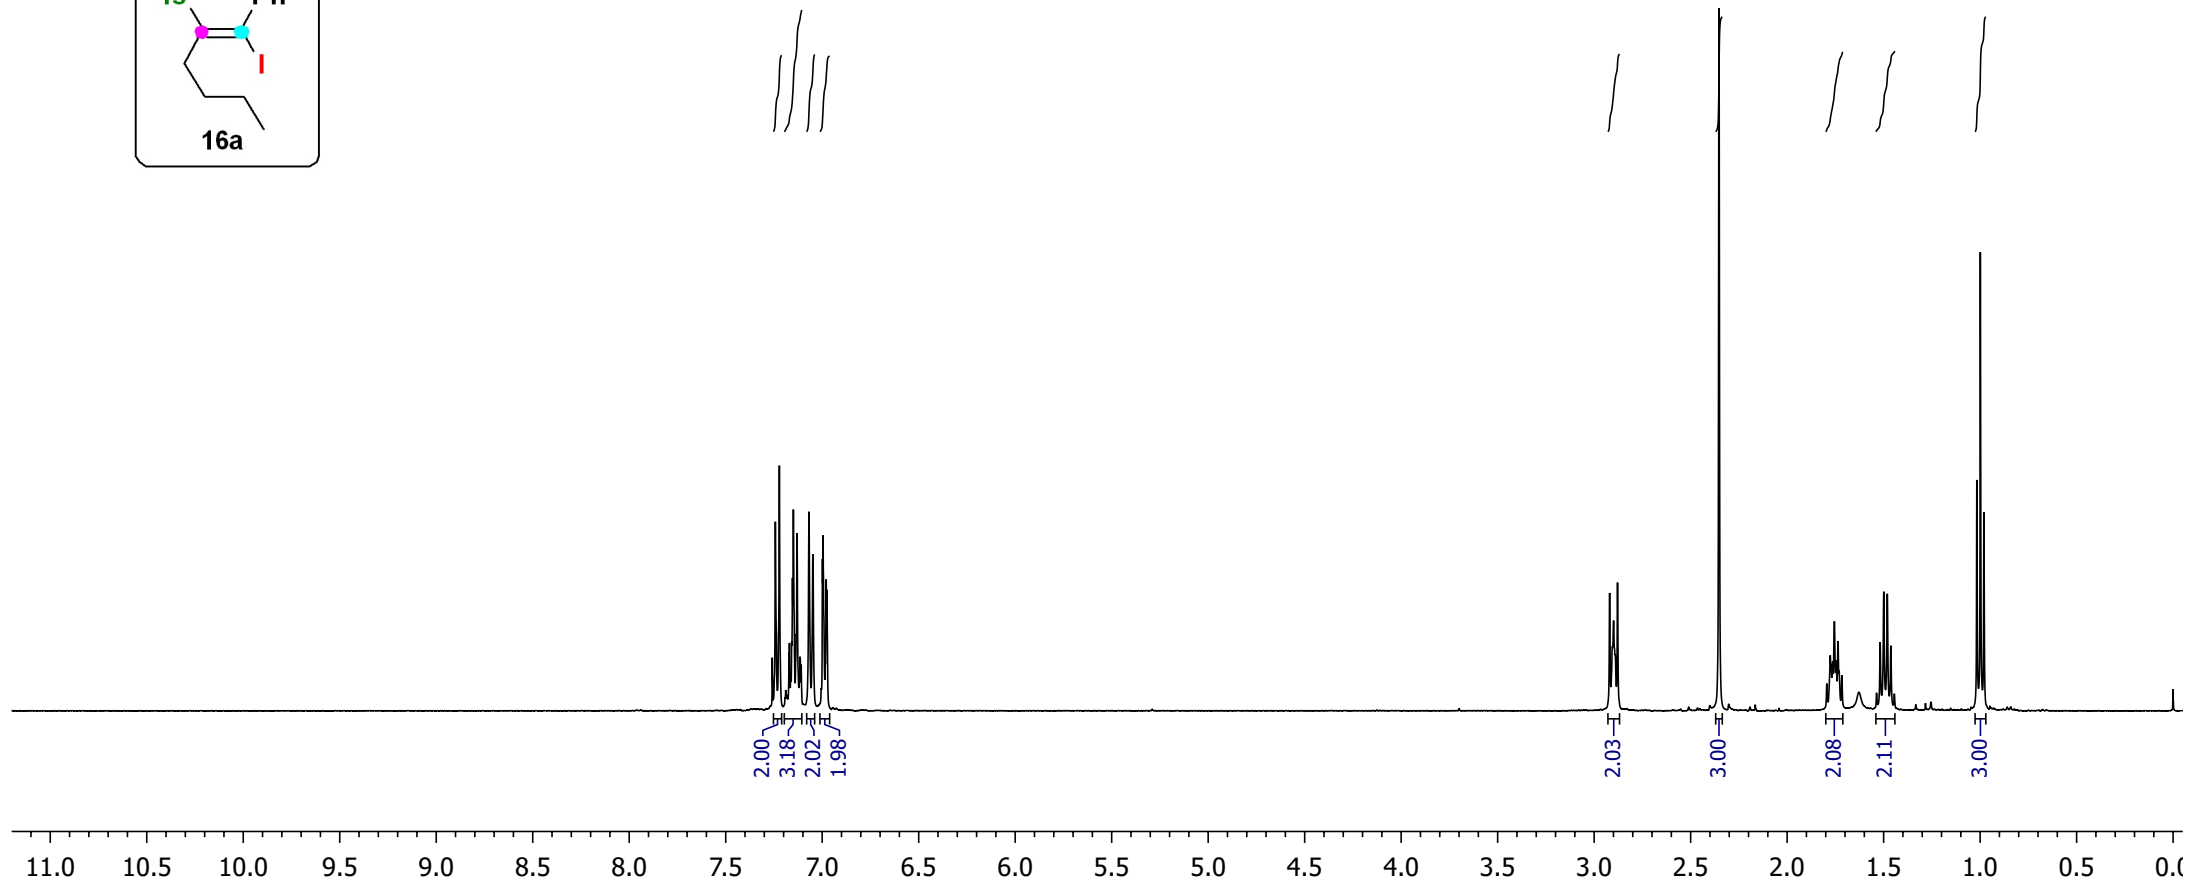

Solvent  $\text{CDCl}_3$   
Spectrometer Frequency 100.66  
Nucleus  $^{13}\text{C}$

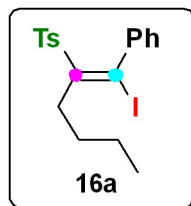

—149.0  
—143.6  
—142.7  
—137.8  
—129.2  
—128.4  
—127.8  
—127.5  
—115.0  
—77.3  
—77.0  
—76.7  
—39.5  
—30.3  
—22.7  
—21.5  
—13.7

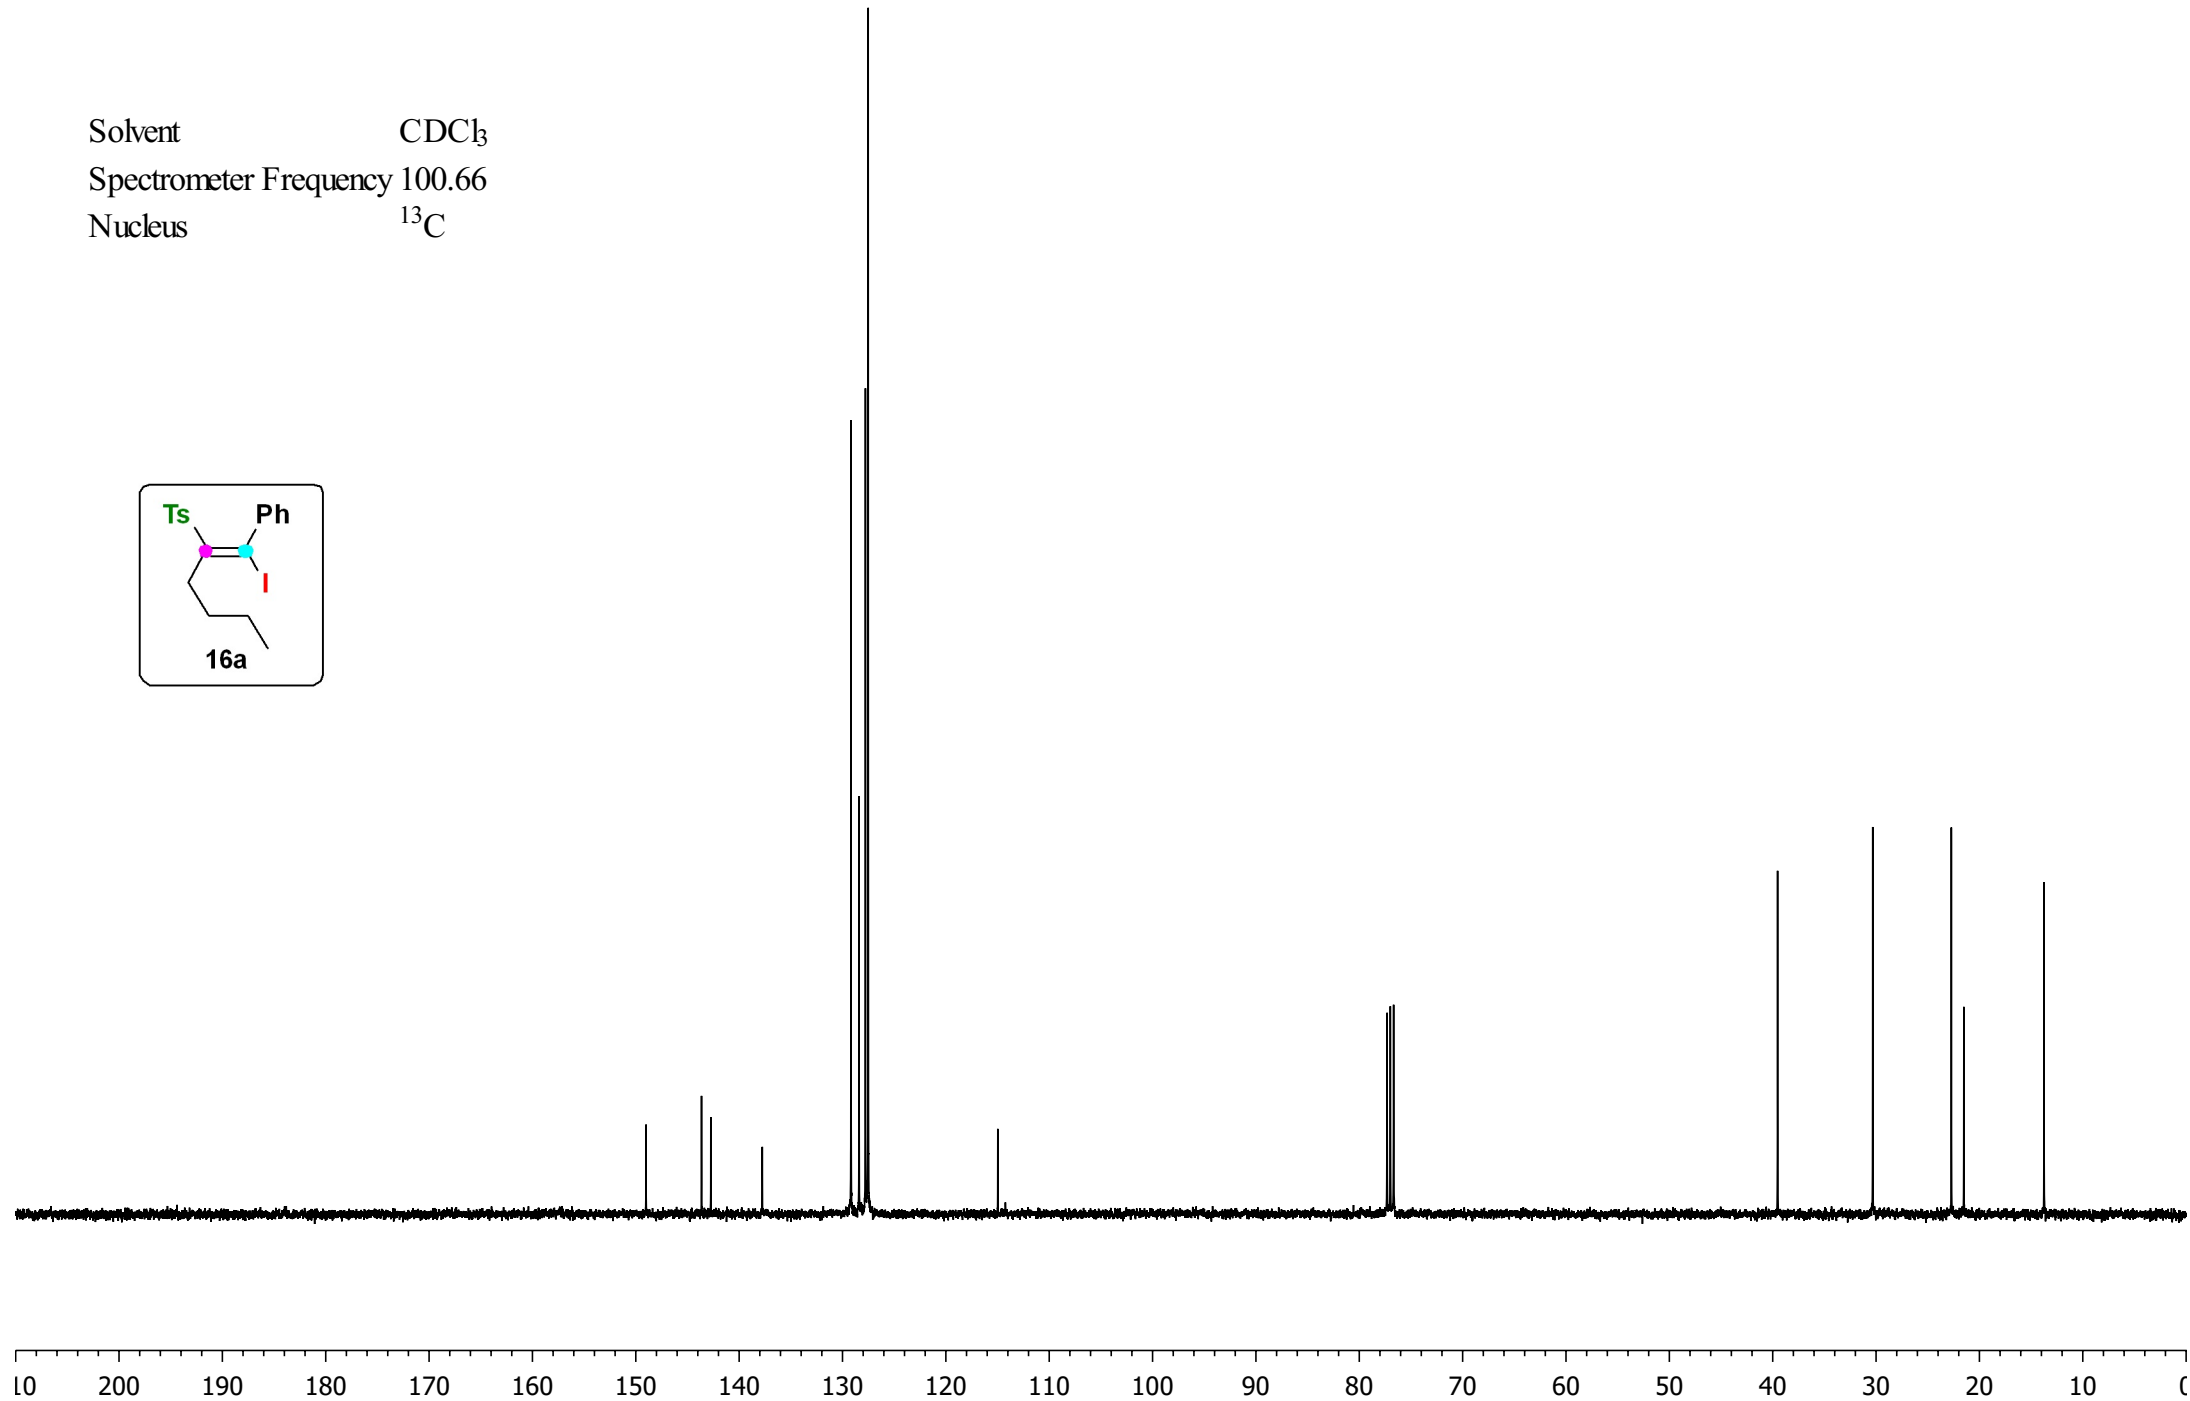

Solvent  $\text{CDCl}_3$   
Spectrometer Frequency 400.28  
Nucleus  $^1\text{H}$

7.48  
7.46  
7.21  
7.21  
7.20  
7.16  
7.16  
7.15  
7.14  
7.12

2.36

1.38  
1.37  
1.35  
1.33  
1.32  
1.09  
1.07

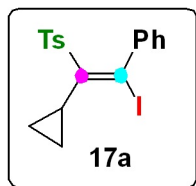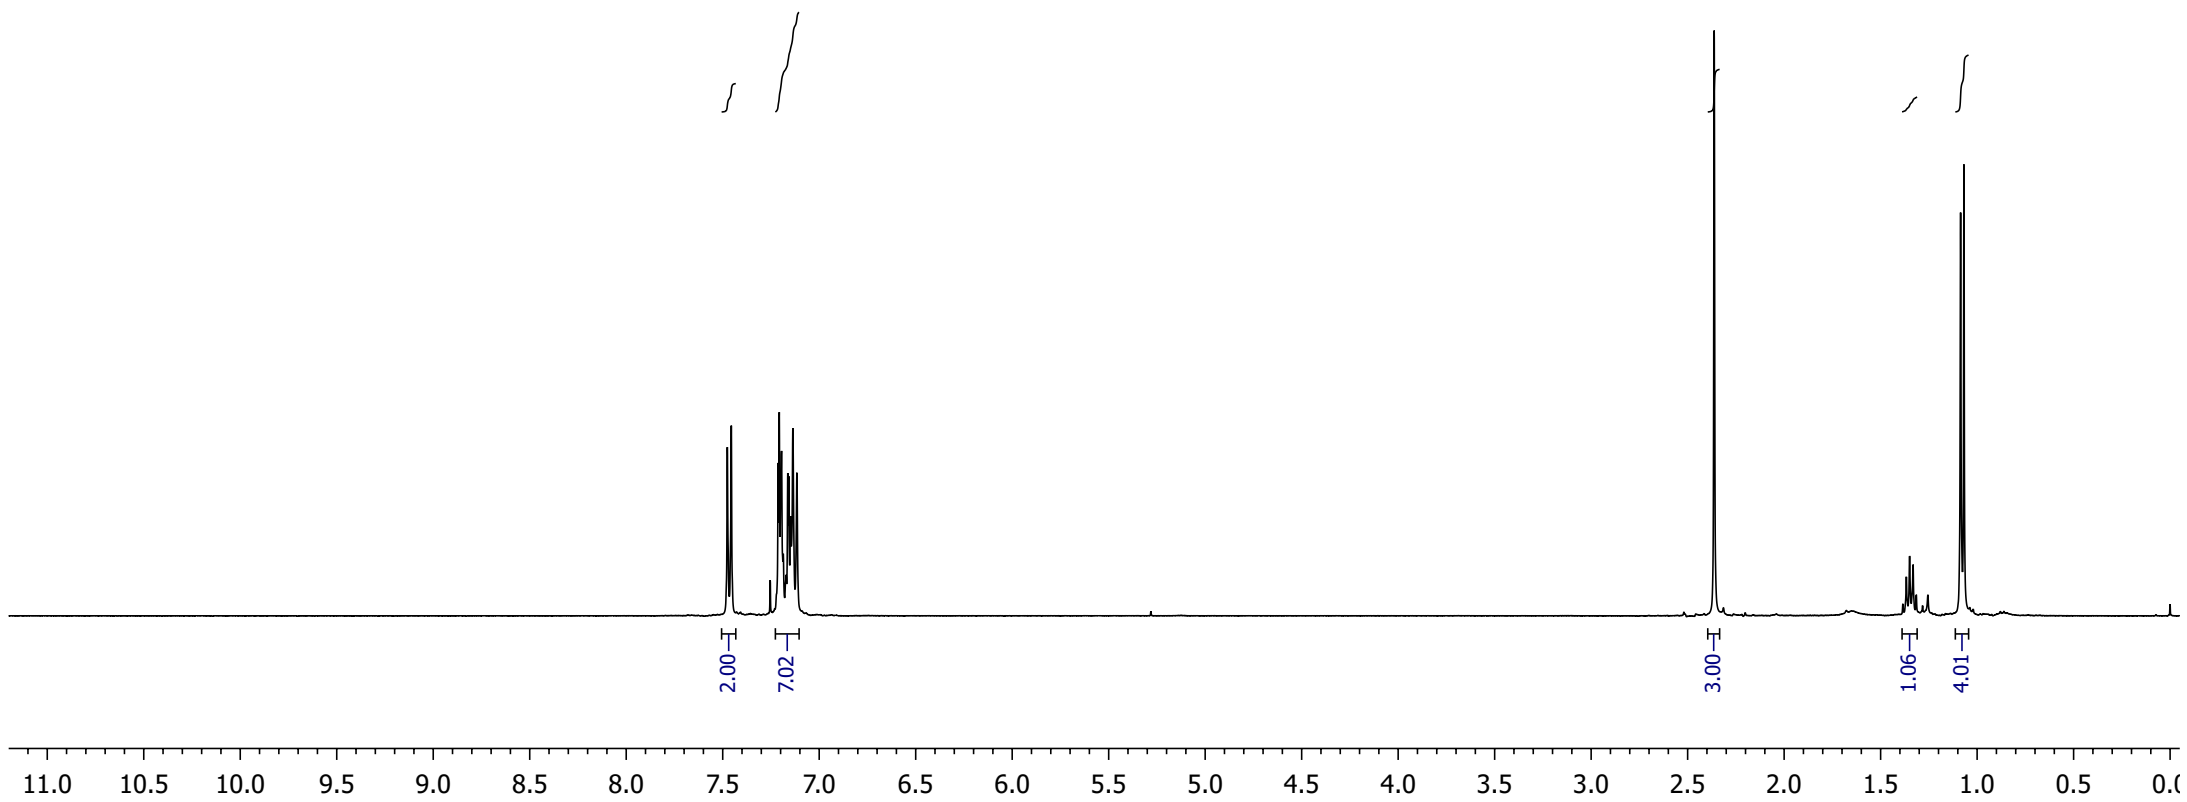

U0111-2  
LJ3-27

S84

Solvent  $\text{CDCl}_3$   
Spectrometer Frequency 100.66  
Nucleus  $^{13}\text{C}$



147.6  
143.6  
142.8  
137.6  
129.1  
128.9  
128.2  
127.8  
127.6  
119.8

77.3  
77.0  
76.7

21.5  
20.6

12.0

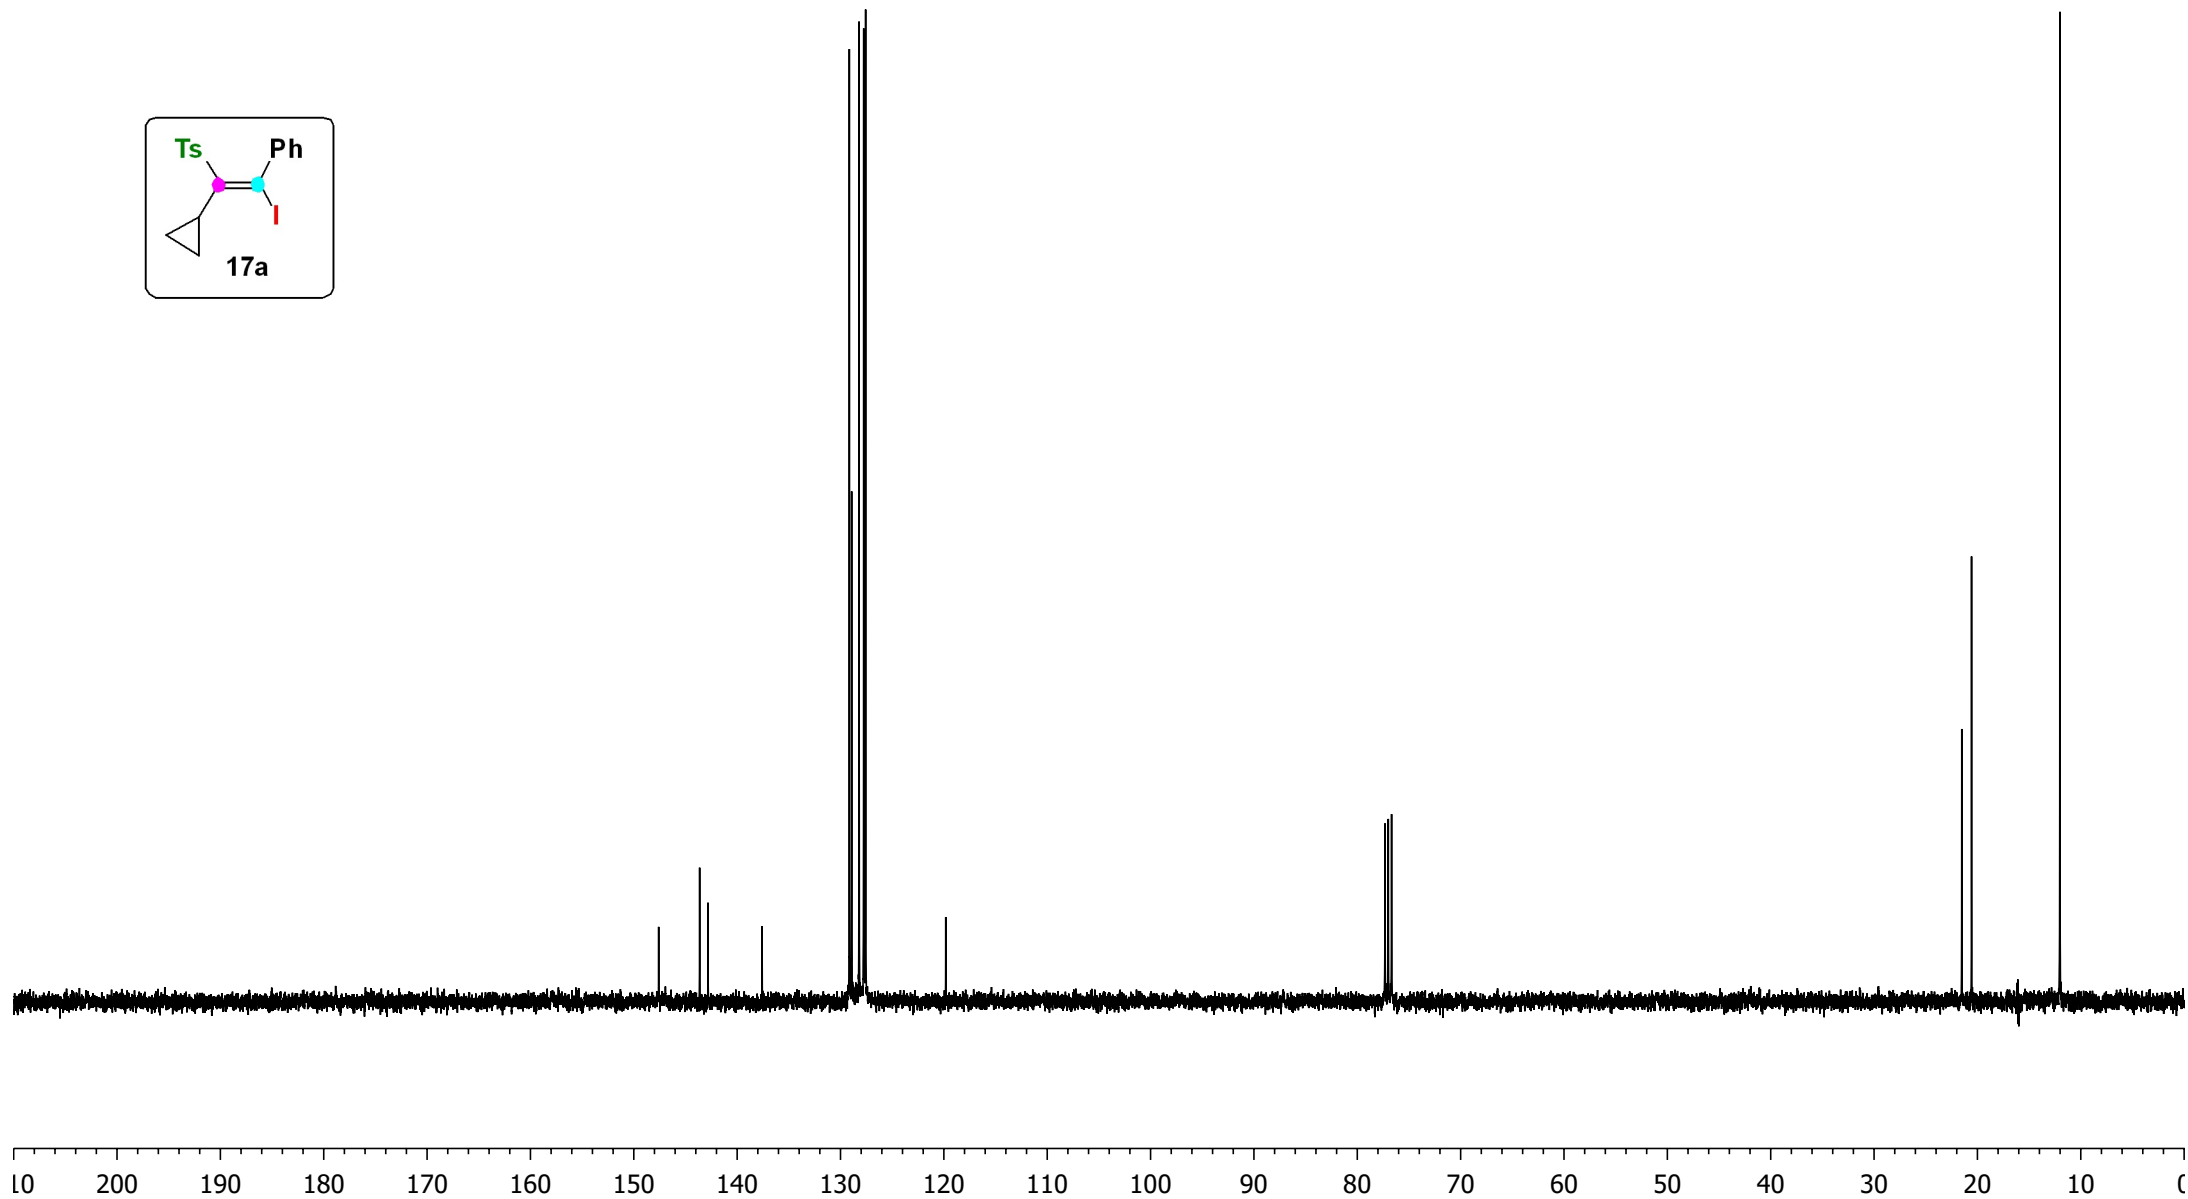

Solvent  $\text{CDCl}_3$   
Spectrometer Frequency 400.40  
Nucleus  $^1\text{H}$

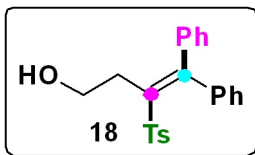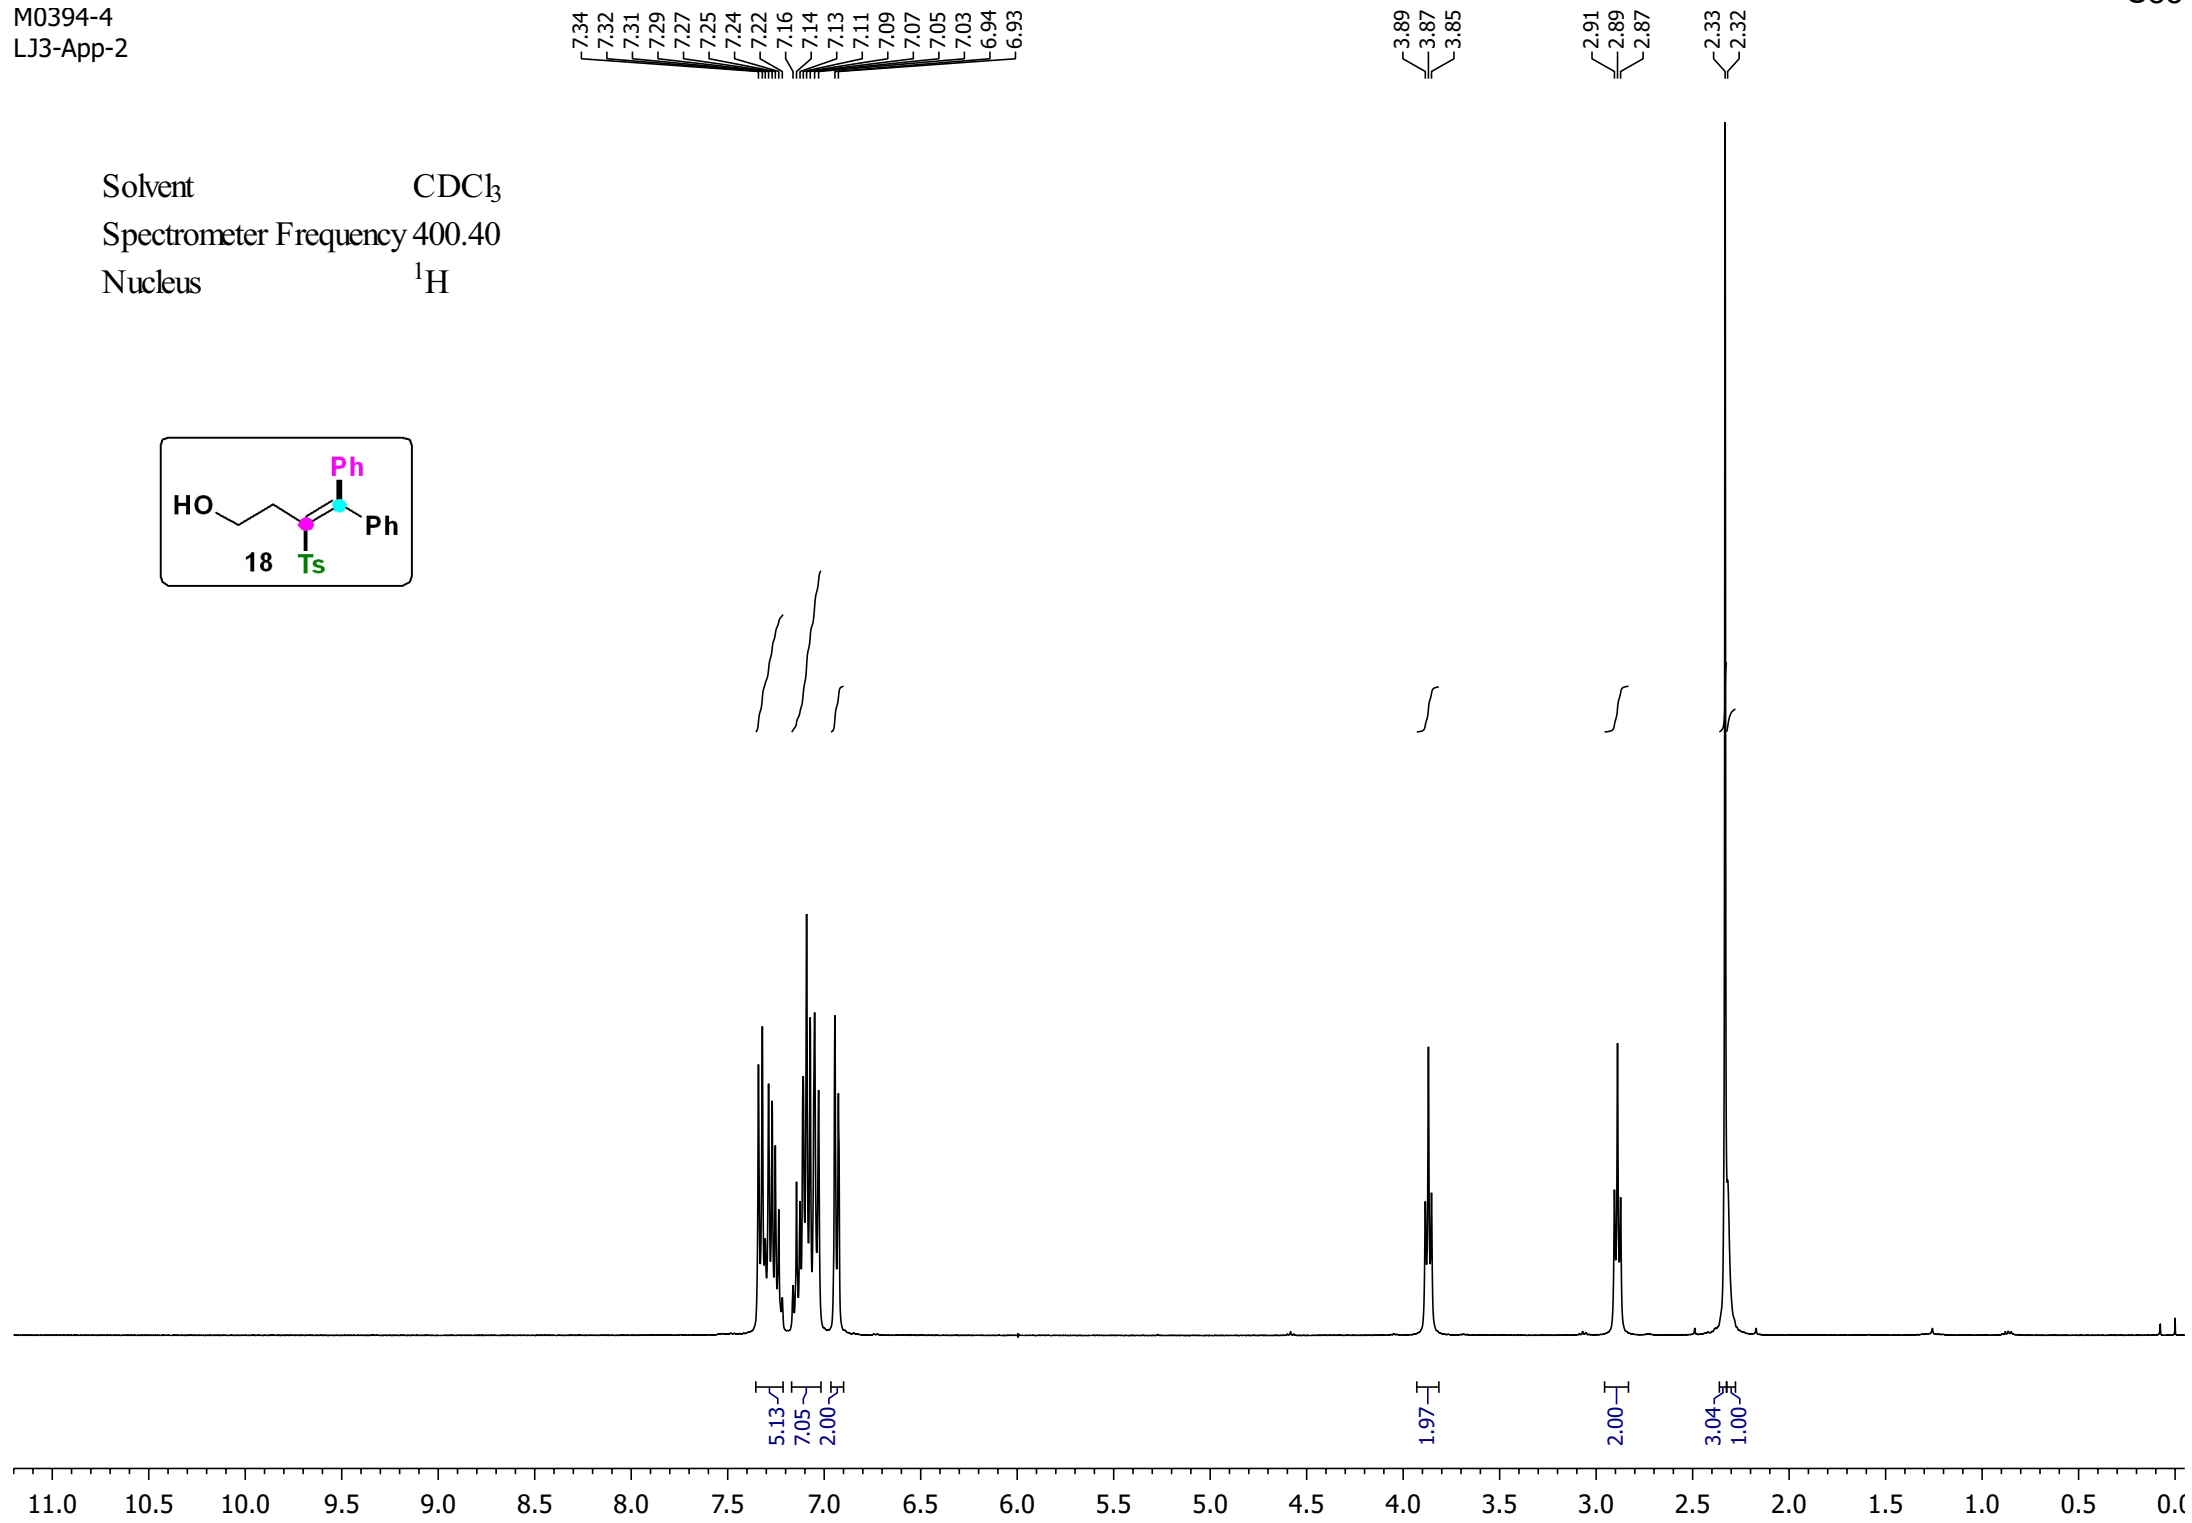

Solvent  $\text{CDCl}_3$   
Spectrometer Frequency 100.69  
Nucleus  $^{13}\text{C}$

153.9  
143.2  
140.8  
140.0  
138.9  
138.0  
129.0  
128.9  
128.6  
128.0  
127.7  
127.5  
127.4

77.3  
77.0  
76.7

62.2

33.8

21.4

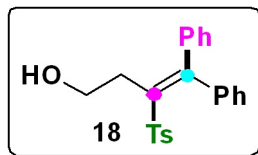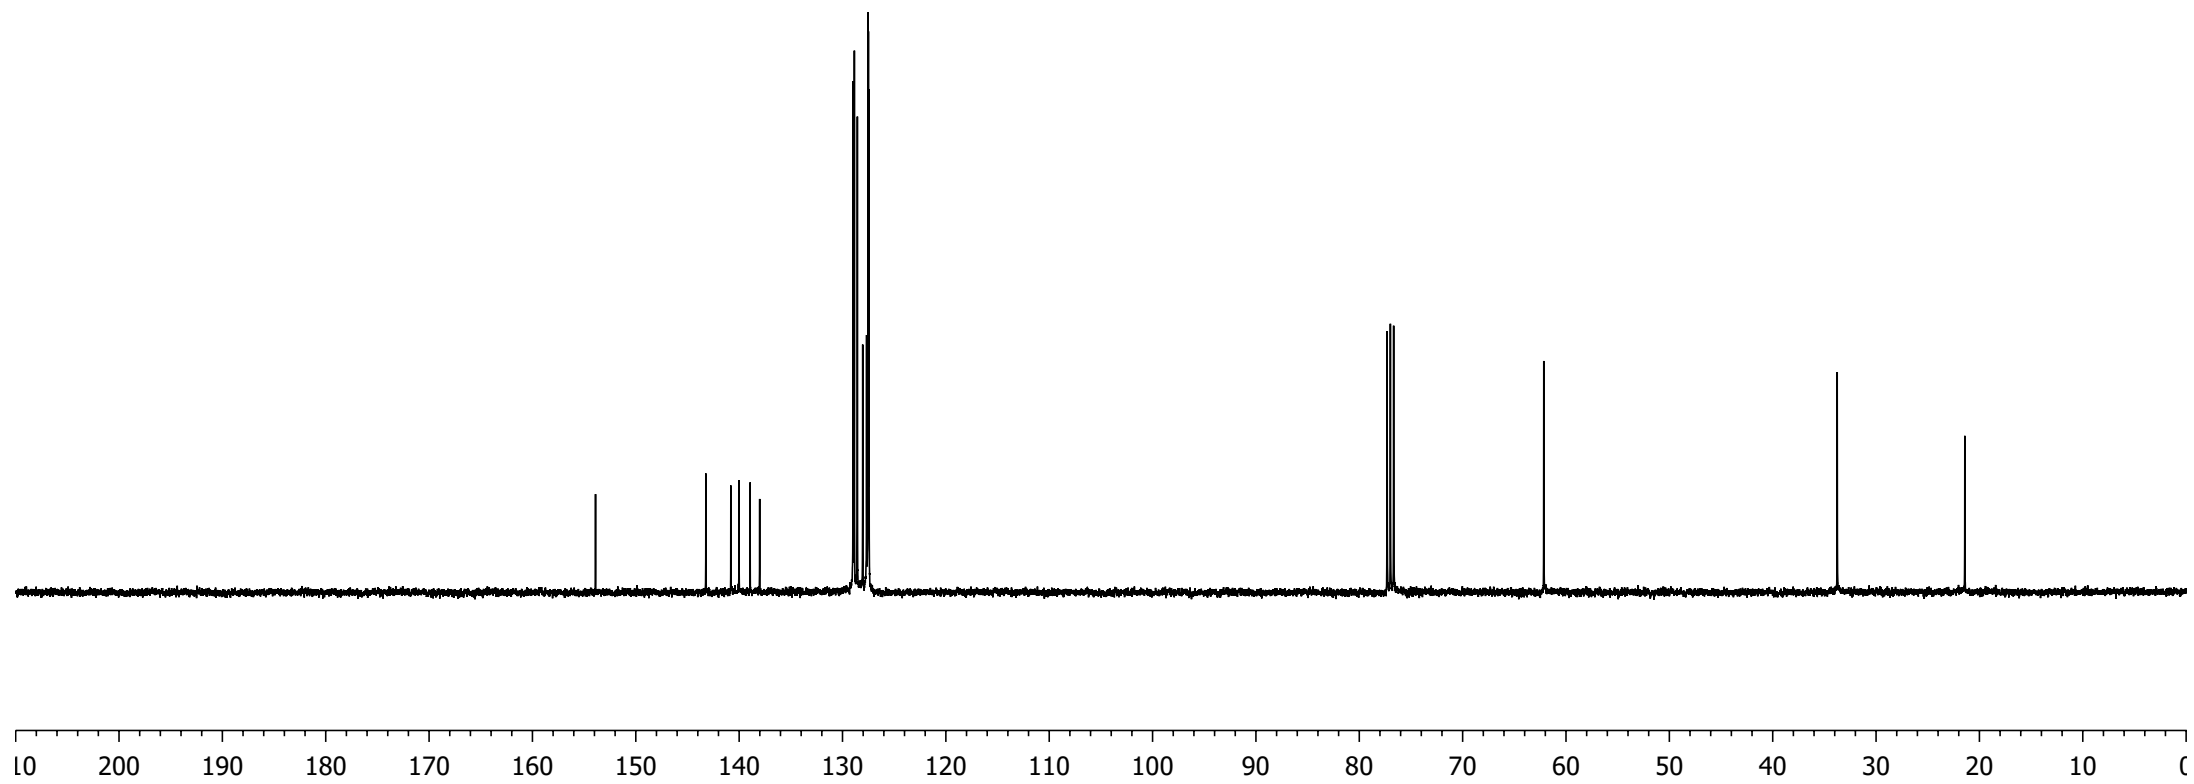

V0118-4  
LJ3-App-1

Solvent  $CDCl_3$   
Spectrometer Frequency 597.22  
Nucleus  $^1H$

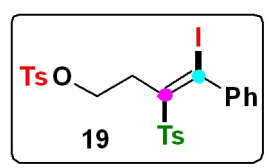

7.88  
7.86  
7.38  
7.37  
7.26  
7.19  
7.19  
7.18  
7.18  
7.17  
7.17  
7.15  
7.14  
7.14  
7.13  
7.12  
7.12  
7.07  
7.06  
6.95  
6.93

4.41  
4.40  
4.39

3.33  
3.31  
3.30

2.45  
2.35

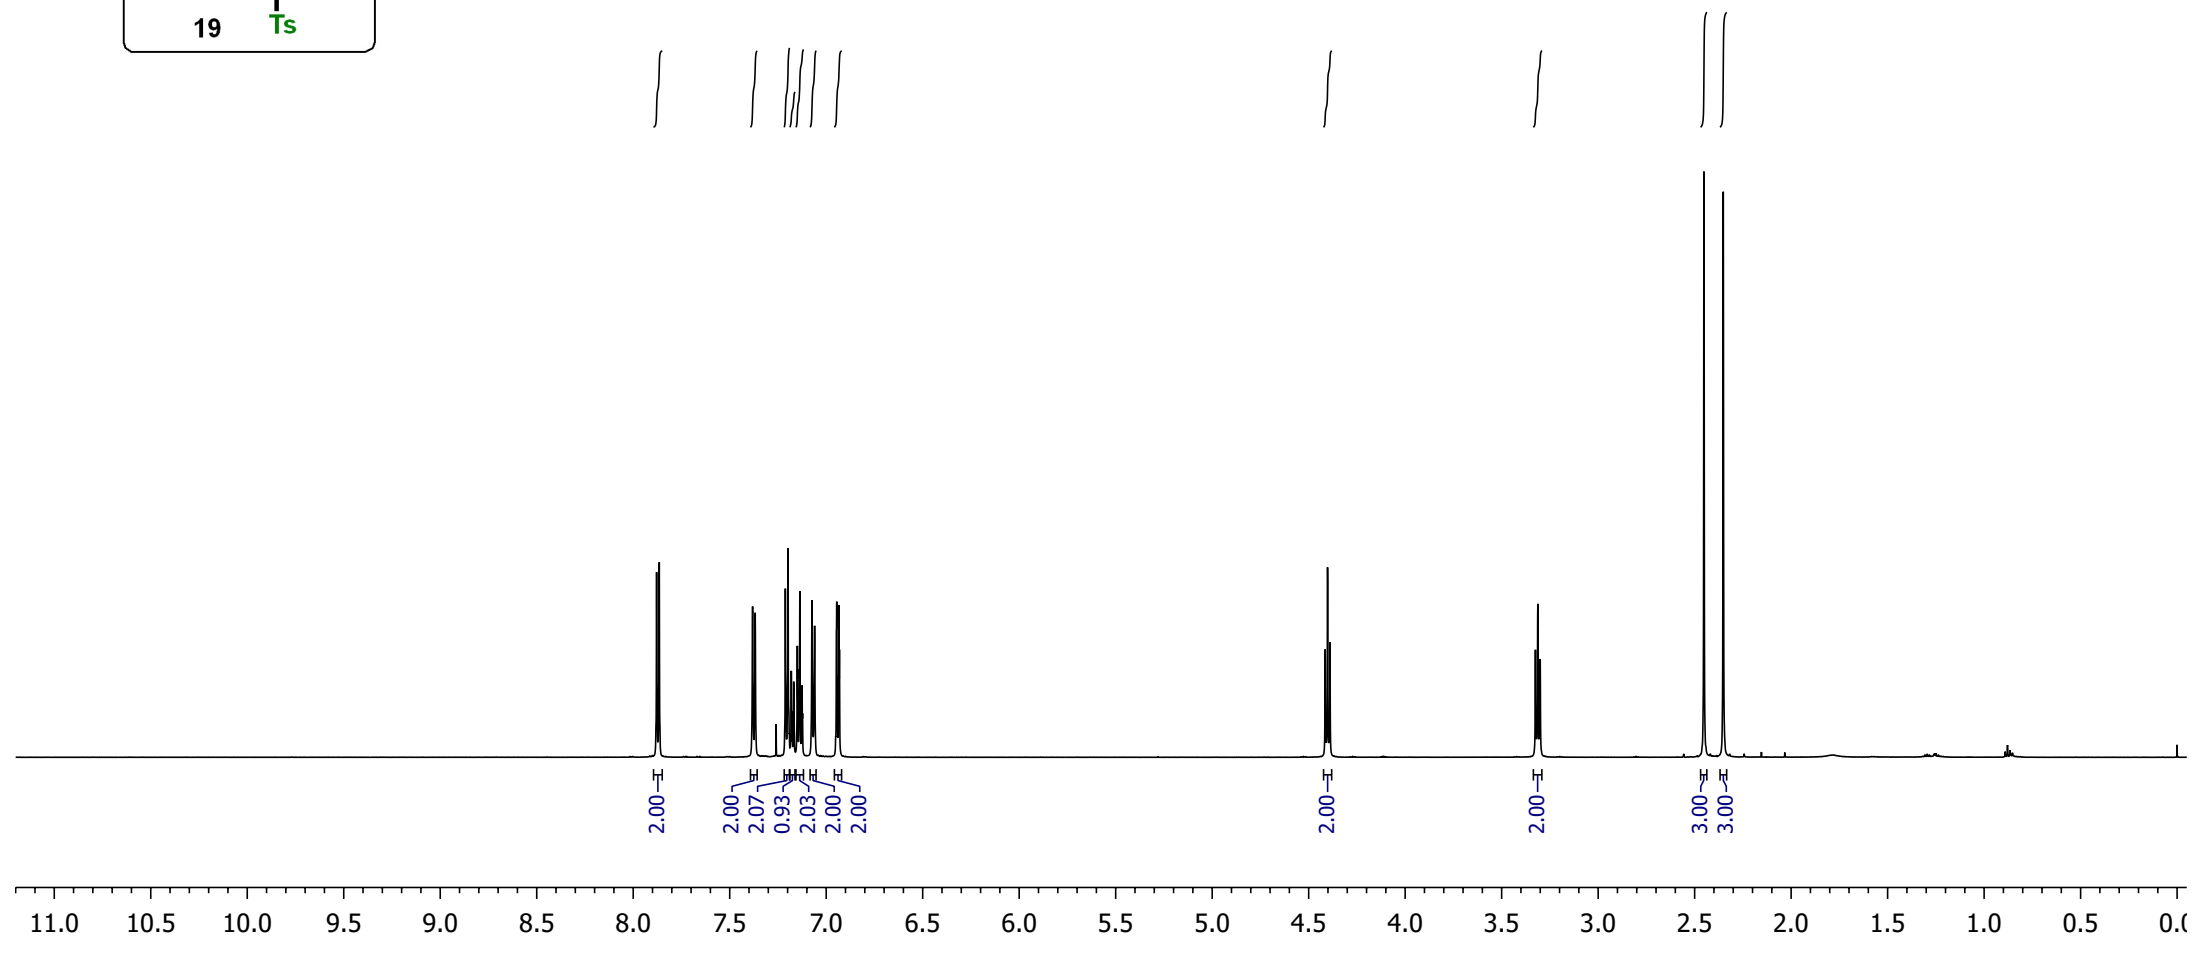

144.9  
144.2  
143.7  
142.3  
129.9  
129.4  
128.7  
128.0  
127.6  
127.6  
126.3

77.2  
77.0  
76.8

67.0

39.0

21.6  
21.5

Solvent  $\text{CDCl}_3$   
Spectrometer Frequency 150.19  
Nucleus  $^{13}\text{C}$

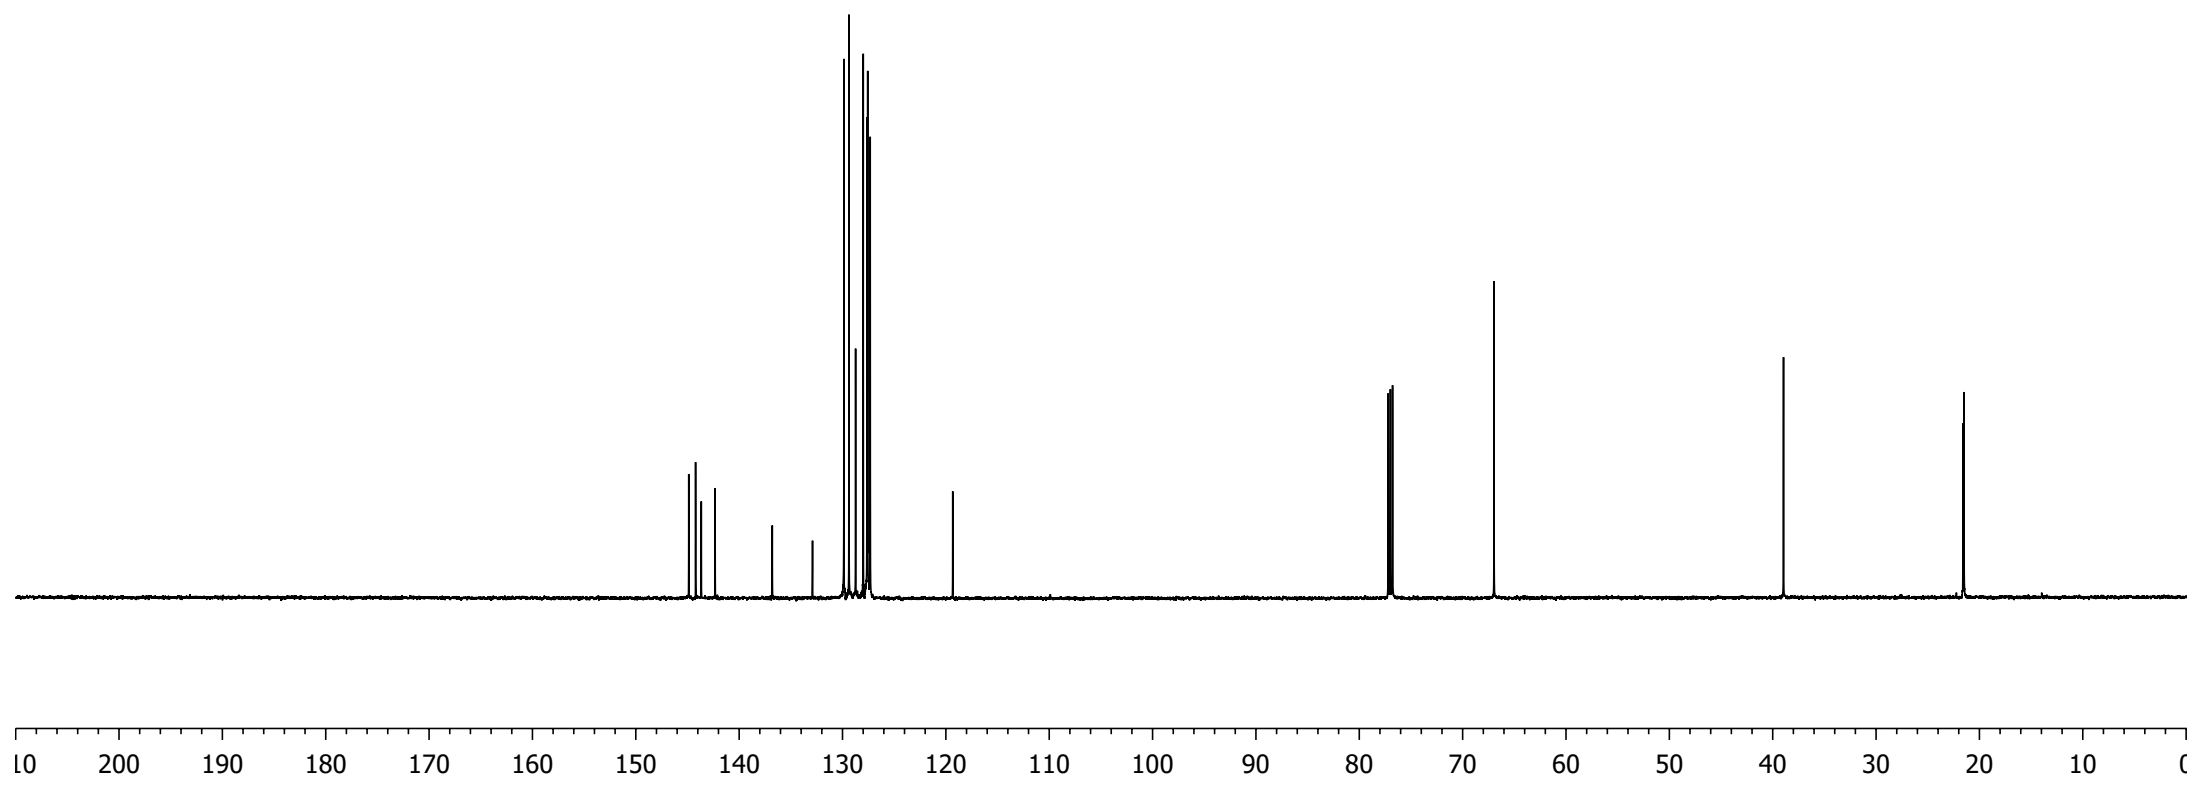



Solvent  $\text{CDCl}_3$   
Spectrometer Frequency 400.40  
Nucleus  $^1\text{H}$

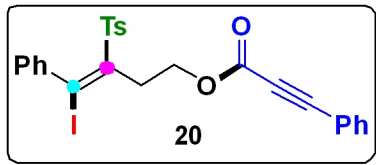

7.61  
7.59  
7.48  
7.47  
7.46  
7.46  
7.45  
7.44  
7.44  
7.43  
7.40  
7.38  
7.36  
7.28  
7.26  
7.21  
7.21  
7.20  
7.19  
7.19  
7.18  
7.18  
7.17  
7.15  
7.14  
7.13  
7.13  
7.08  
7.06  
7.01  
7.00

4.64  
4.63  
4.61

3.42  
3.40  
3.38

2.35

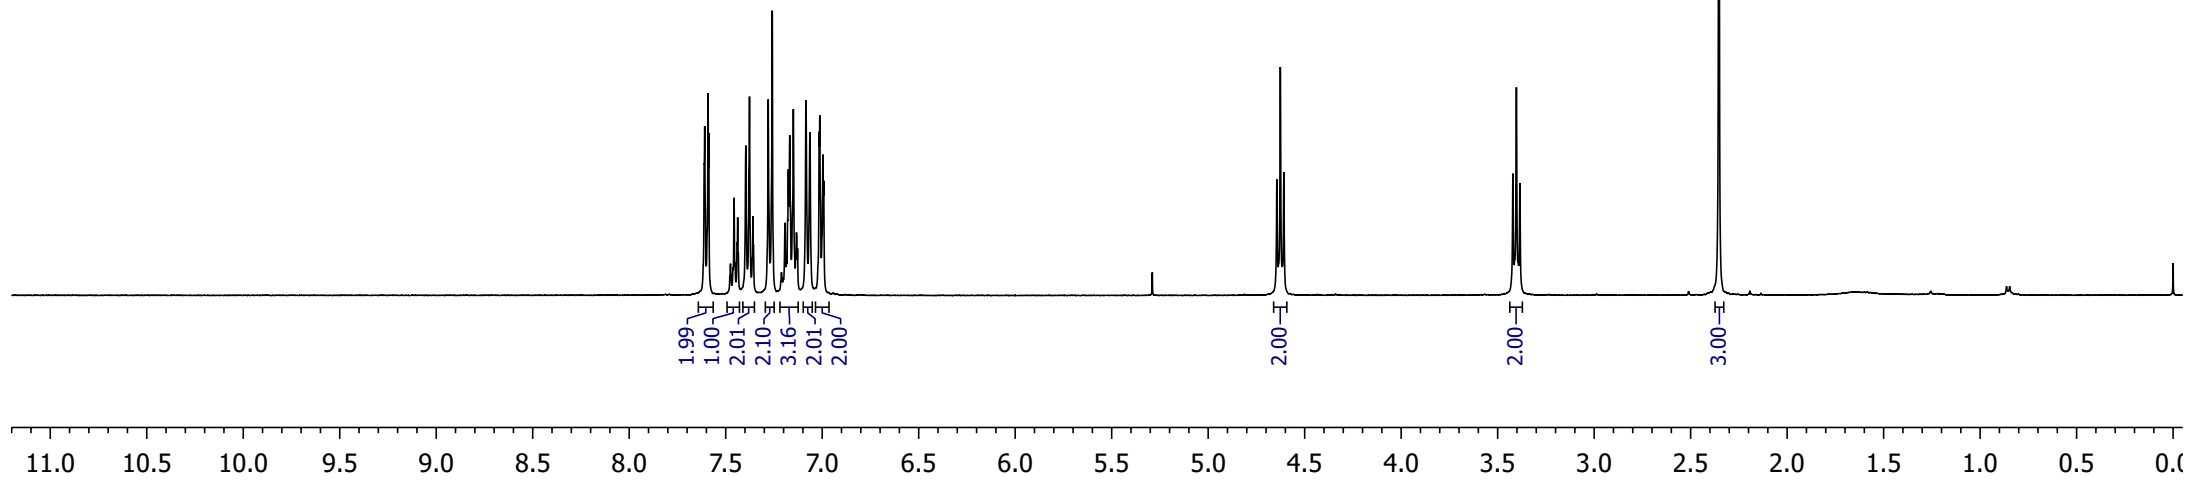

—153.8  
144.8  
144.1  
142.5  
133.0  
129.3  
128.7  
128.5  
127.7  
127.6  
119.5  
118.6

—86.9  
80.5  
77.3  
77.0  
76.7

—63.0

—38.5

—21.5

Solvent  $\text{CDCl}_3$   
Spectrometer Frequency 100.69  
Nucleus  $^{13}\text{C}$

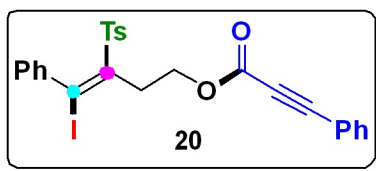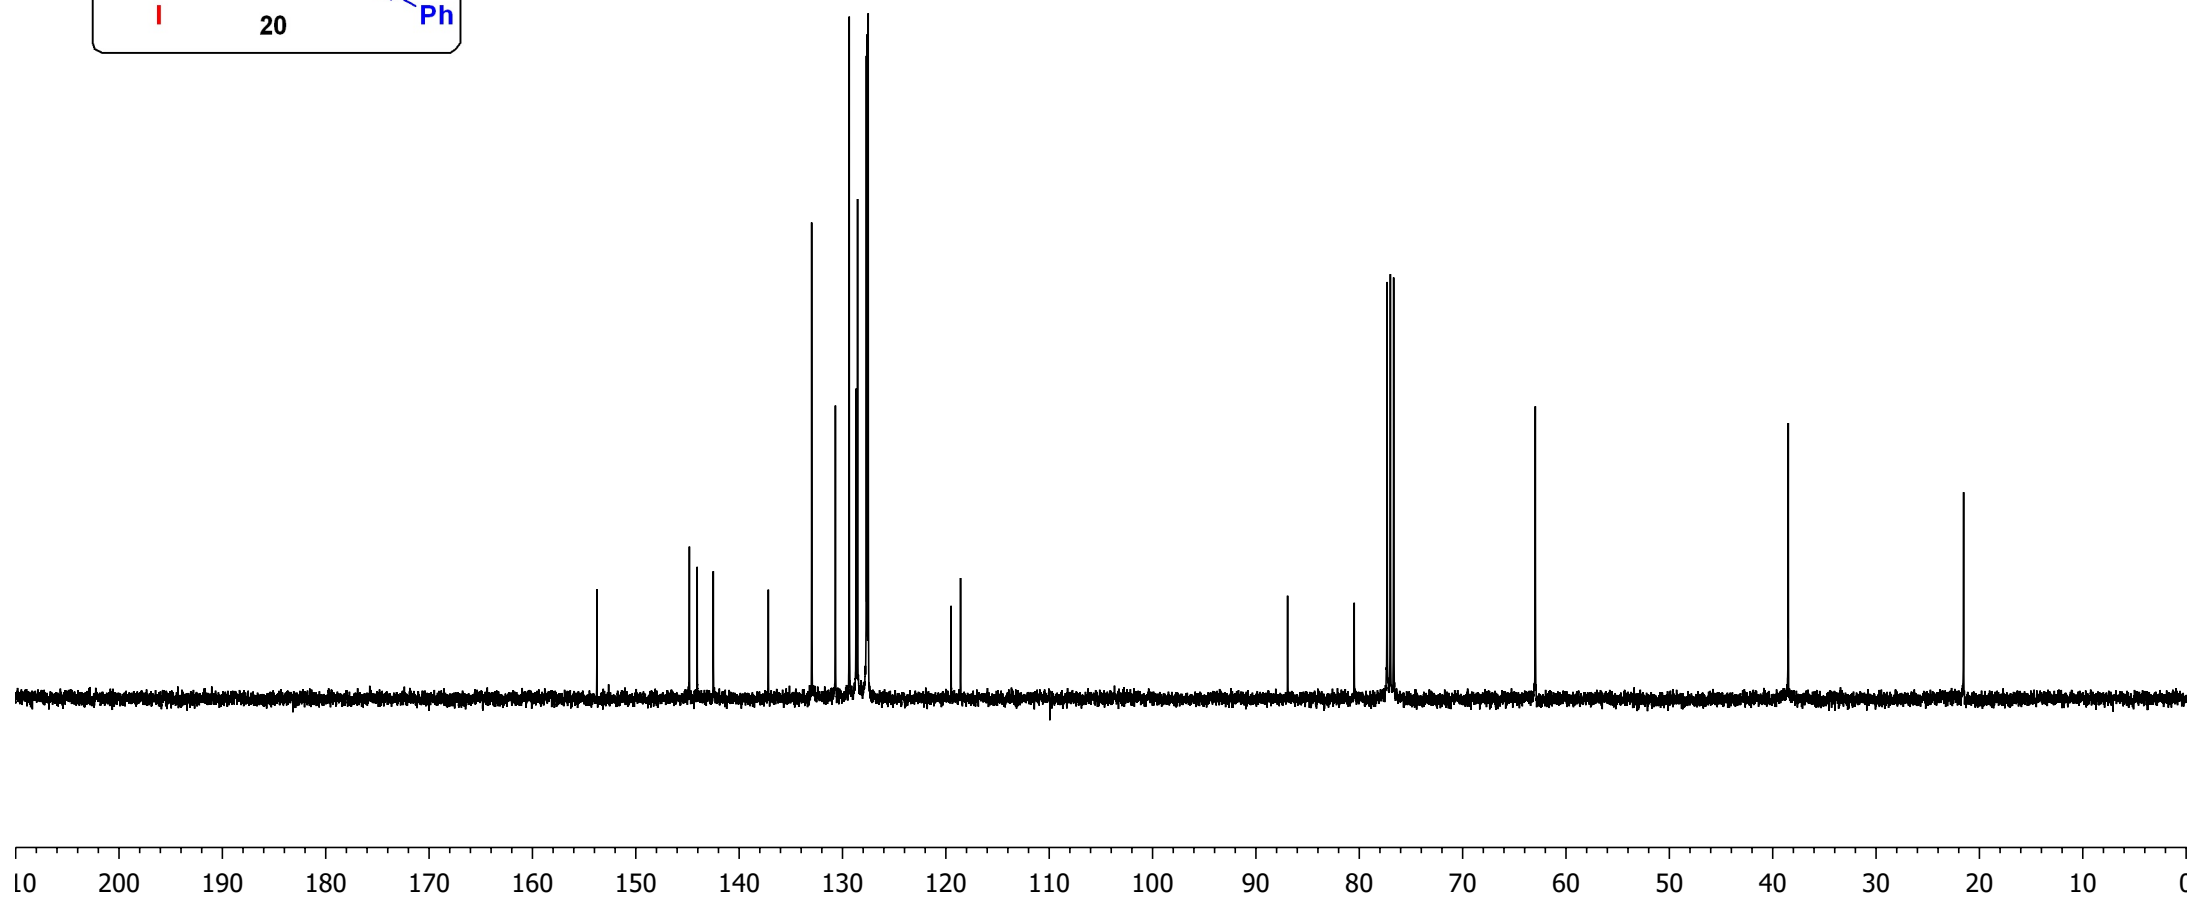

Solvent  $\text{CDCl}_3$   
Spectrometer Frequency 400.40  
Nucleus  $^1\text{H}$

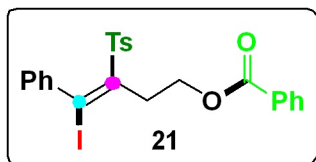

8.16  
8.14  
7.58  
7.56  
7.54  
7.47  
7.45  
7.43  
7.25  
7.23  
7.21  
7.19  
7.17  
7.15  
7.14  
7.12  
7.10  
7.03  
7.01  
6.97  
6.96

4.75  
4.74  
4.72

3.52  
3.50  
3.48

2.33

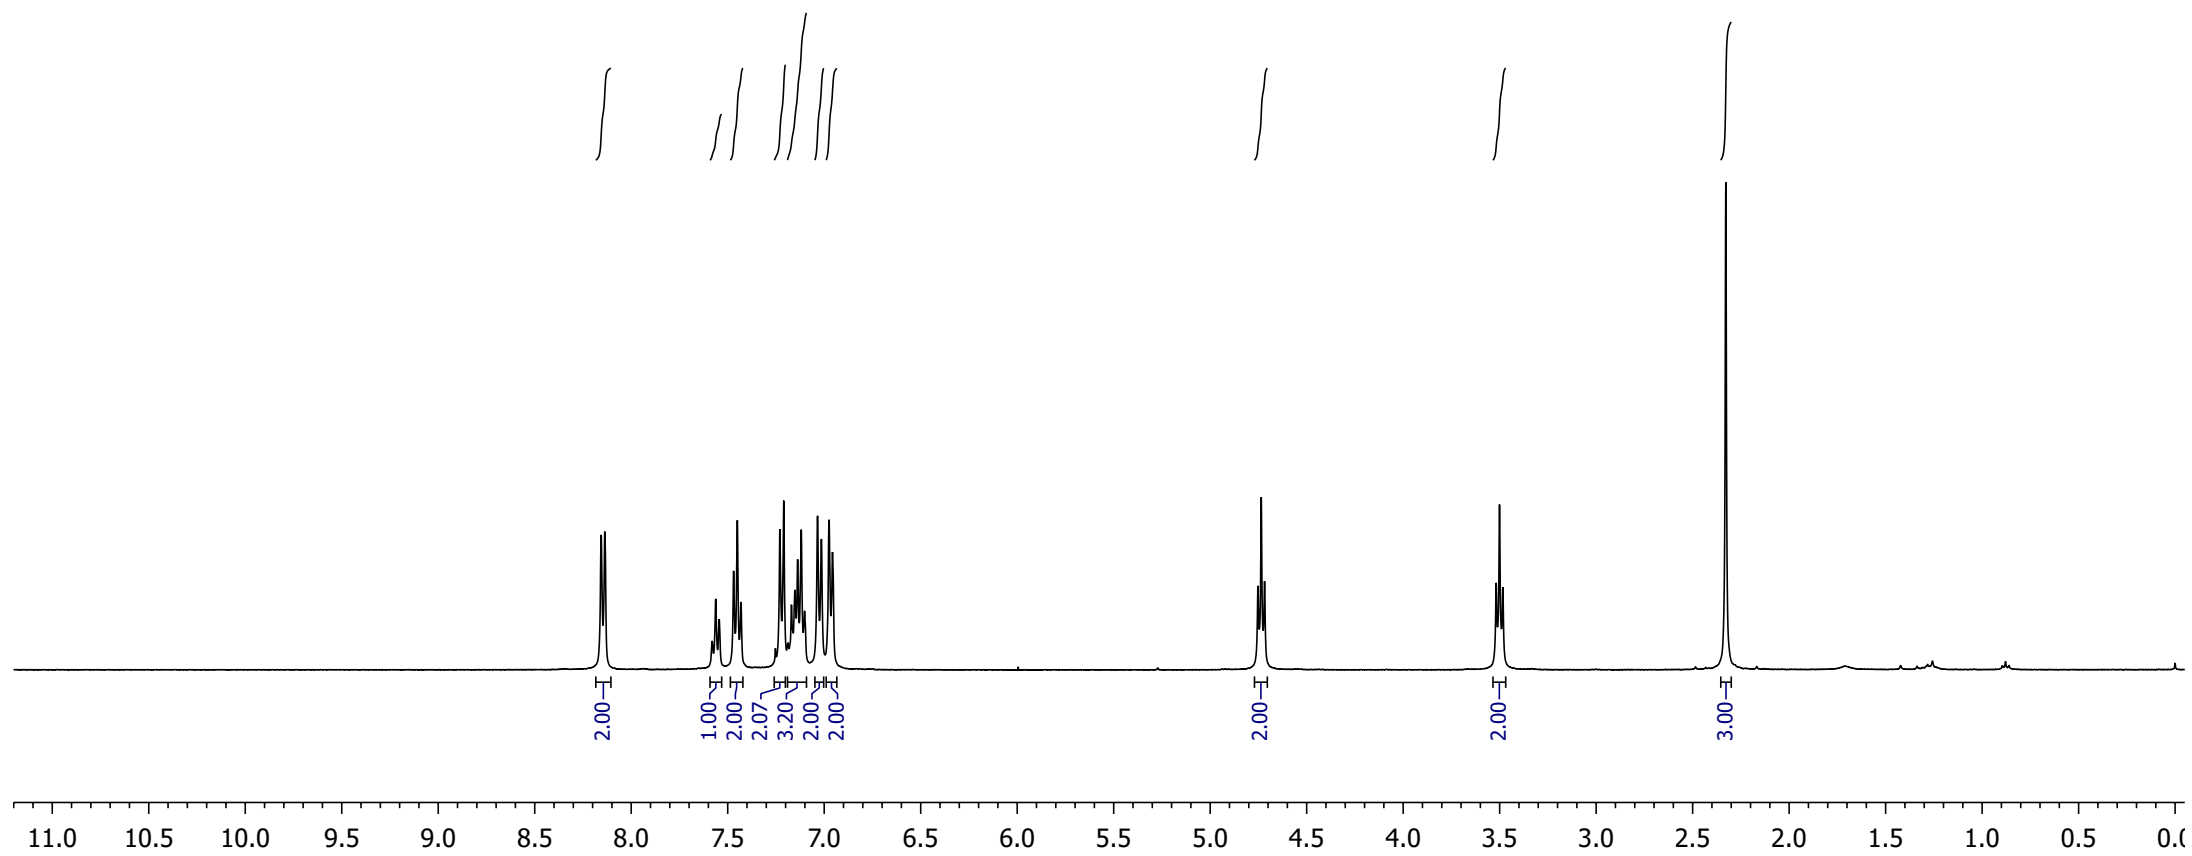

—166.4  
—145.6  
—143.9  
—142.4  
—132.9  
—129.8  
—129.2  
—128.6  
—128.3  
—127.6  
—127.5  
—118.2

—77.3  
—77.0  
—76.7

—62.3

—38.9

—21.5

Solvent  $\text{CDCl}_3$   
Spectrometer Frequency 100.69  
Nucleus  $^{13}\text{C}$

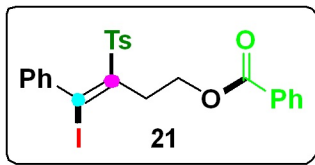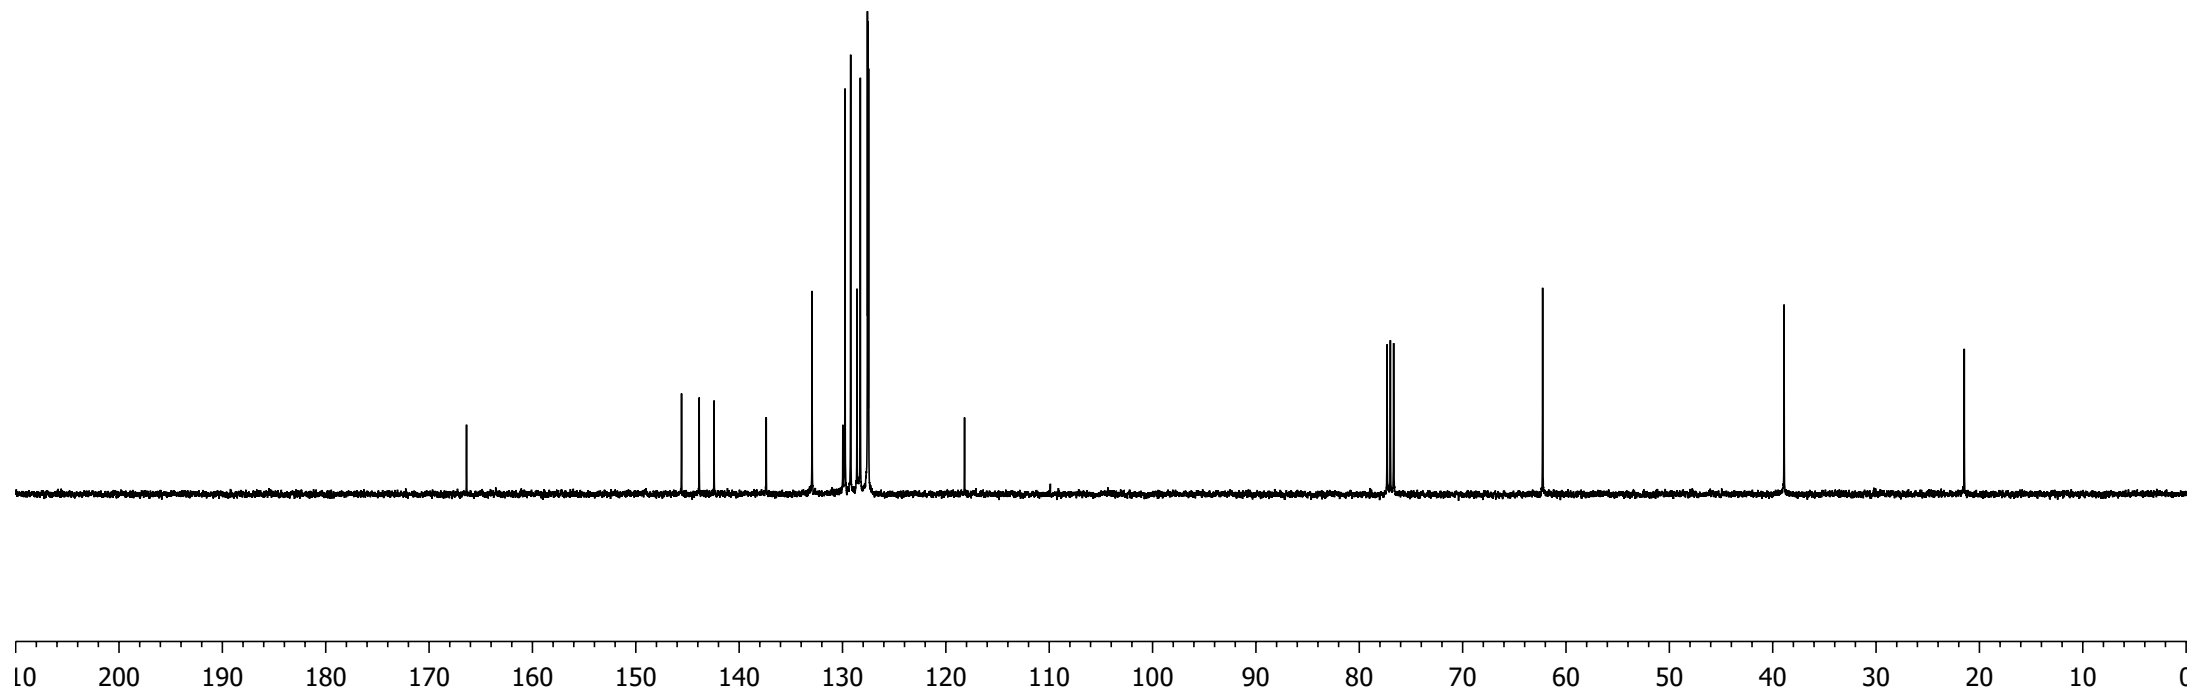

Solvent  $\text{CDCl}_3$   
Spectrometer Frequency 400.40

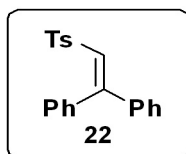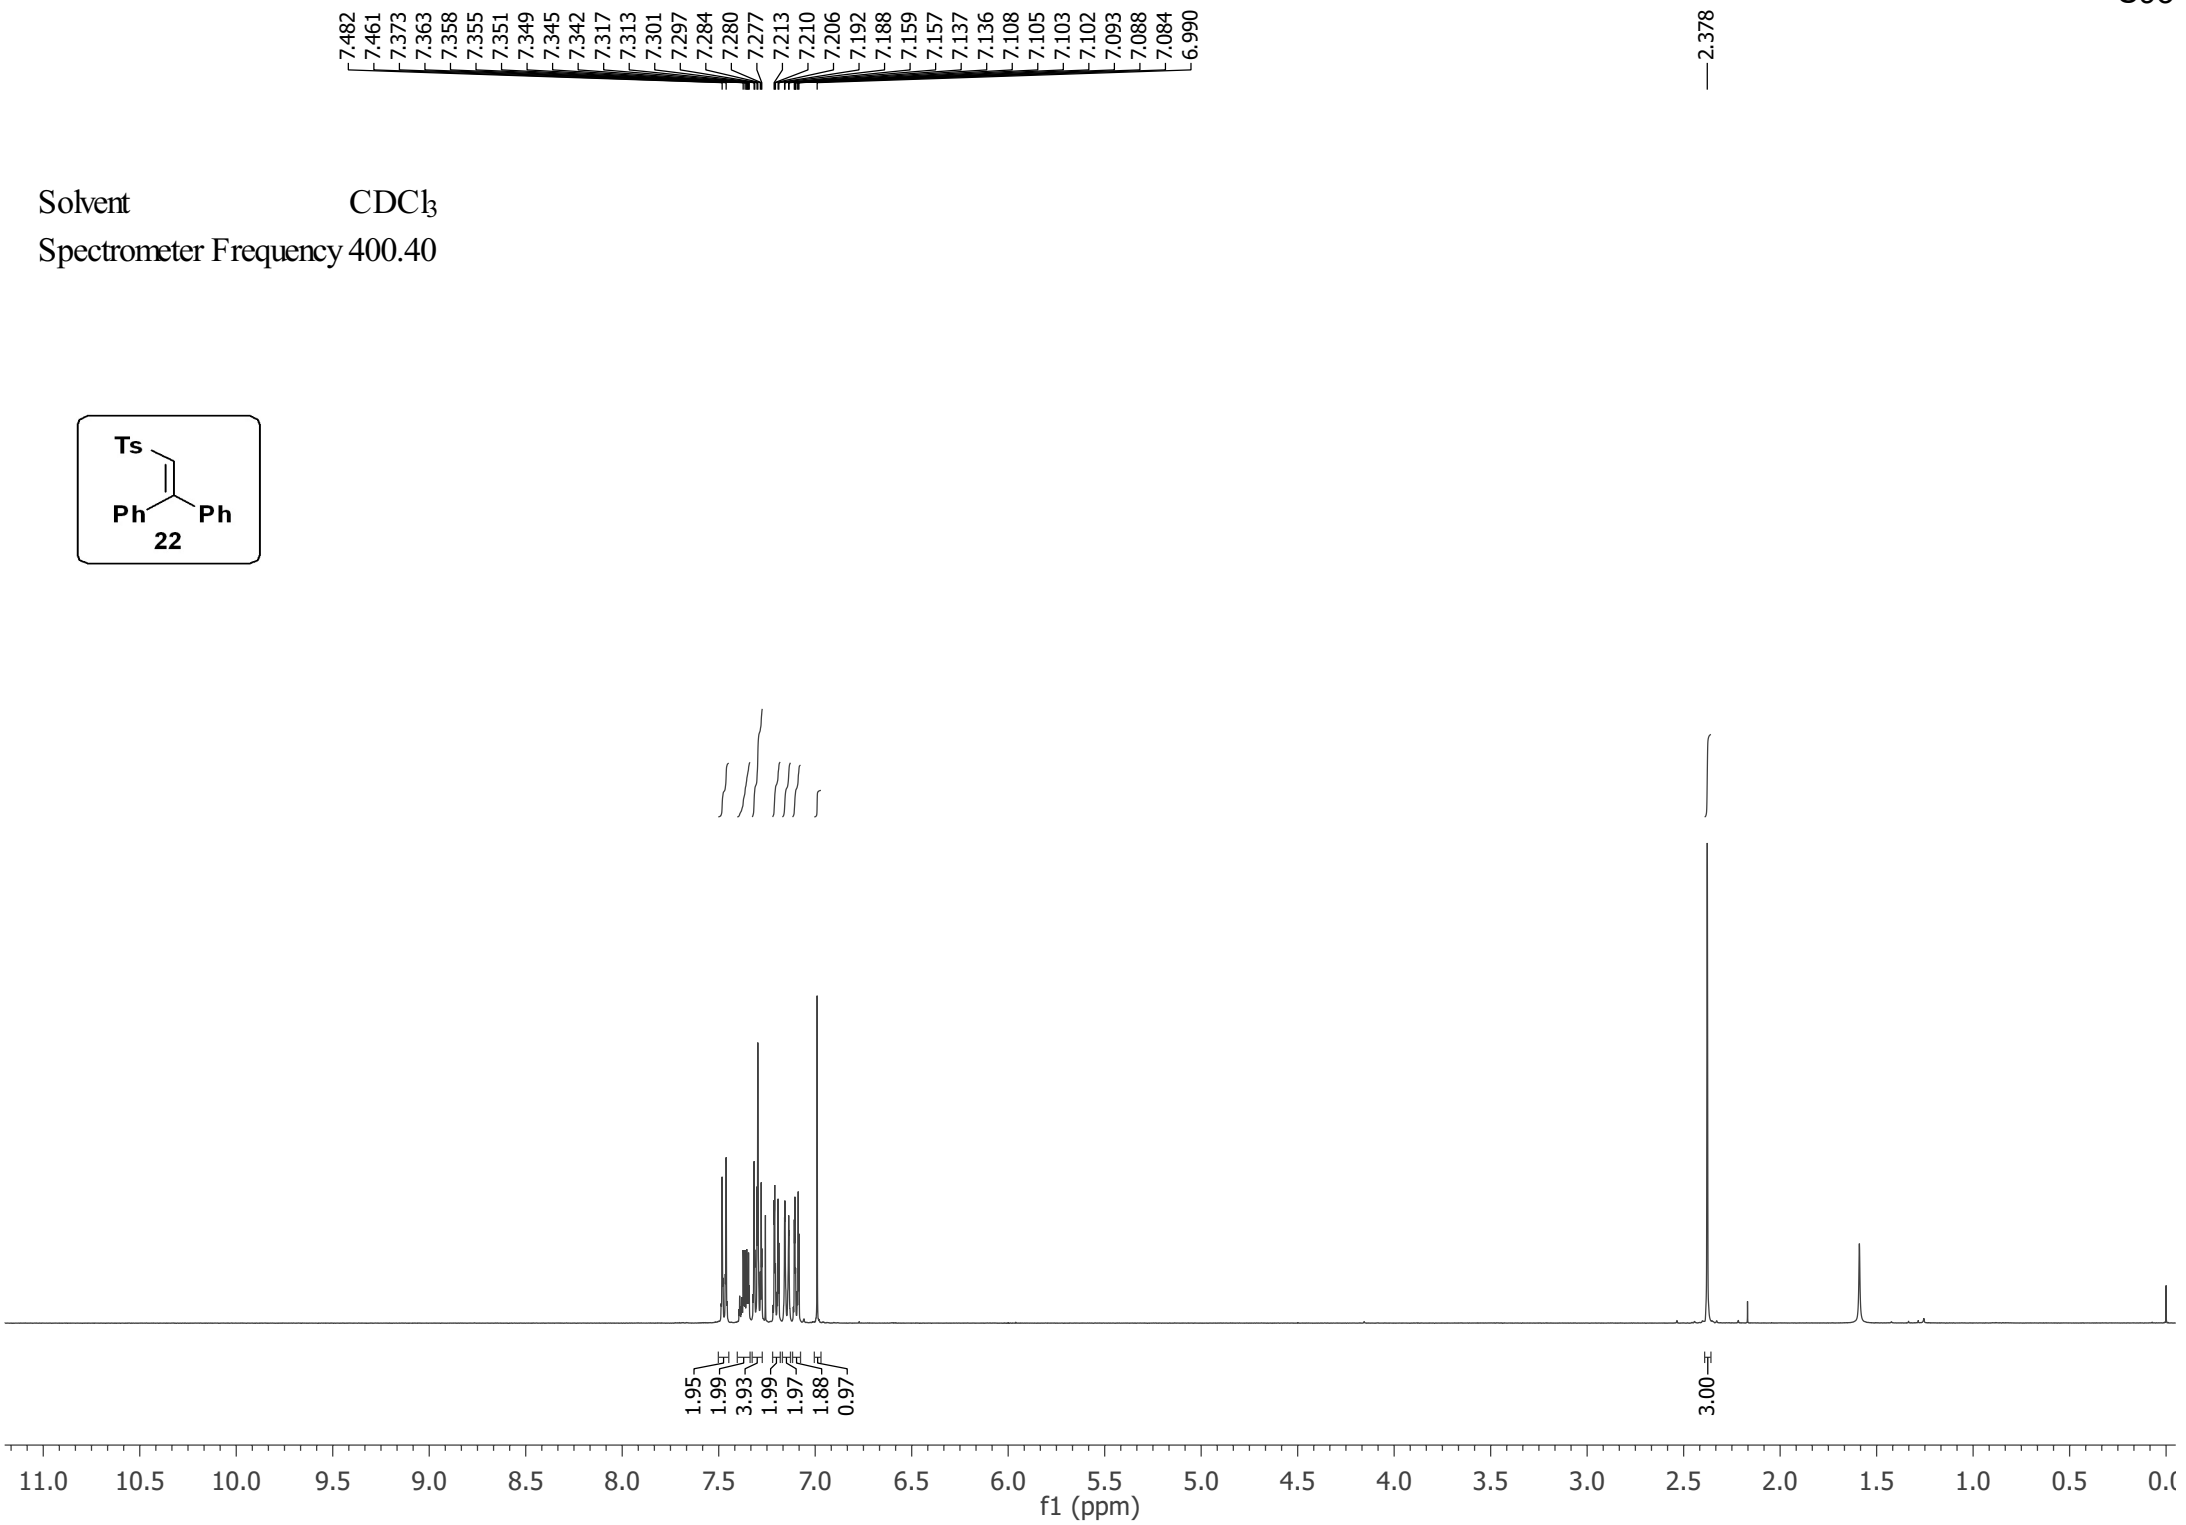

Solvent  $\text{CDCl}_3$   
Spectrometer Frequency 100.69

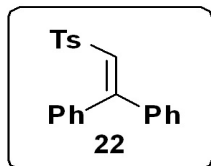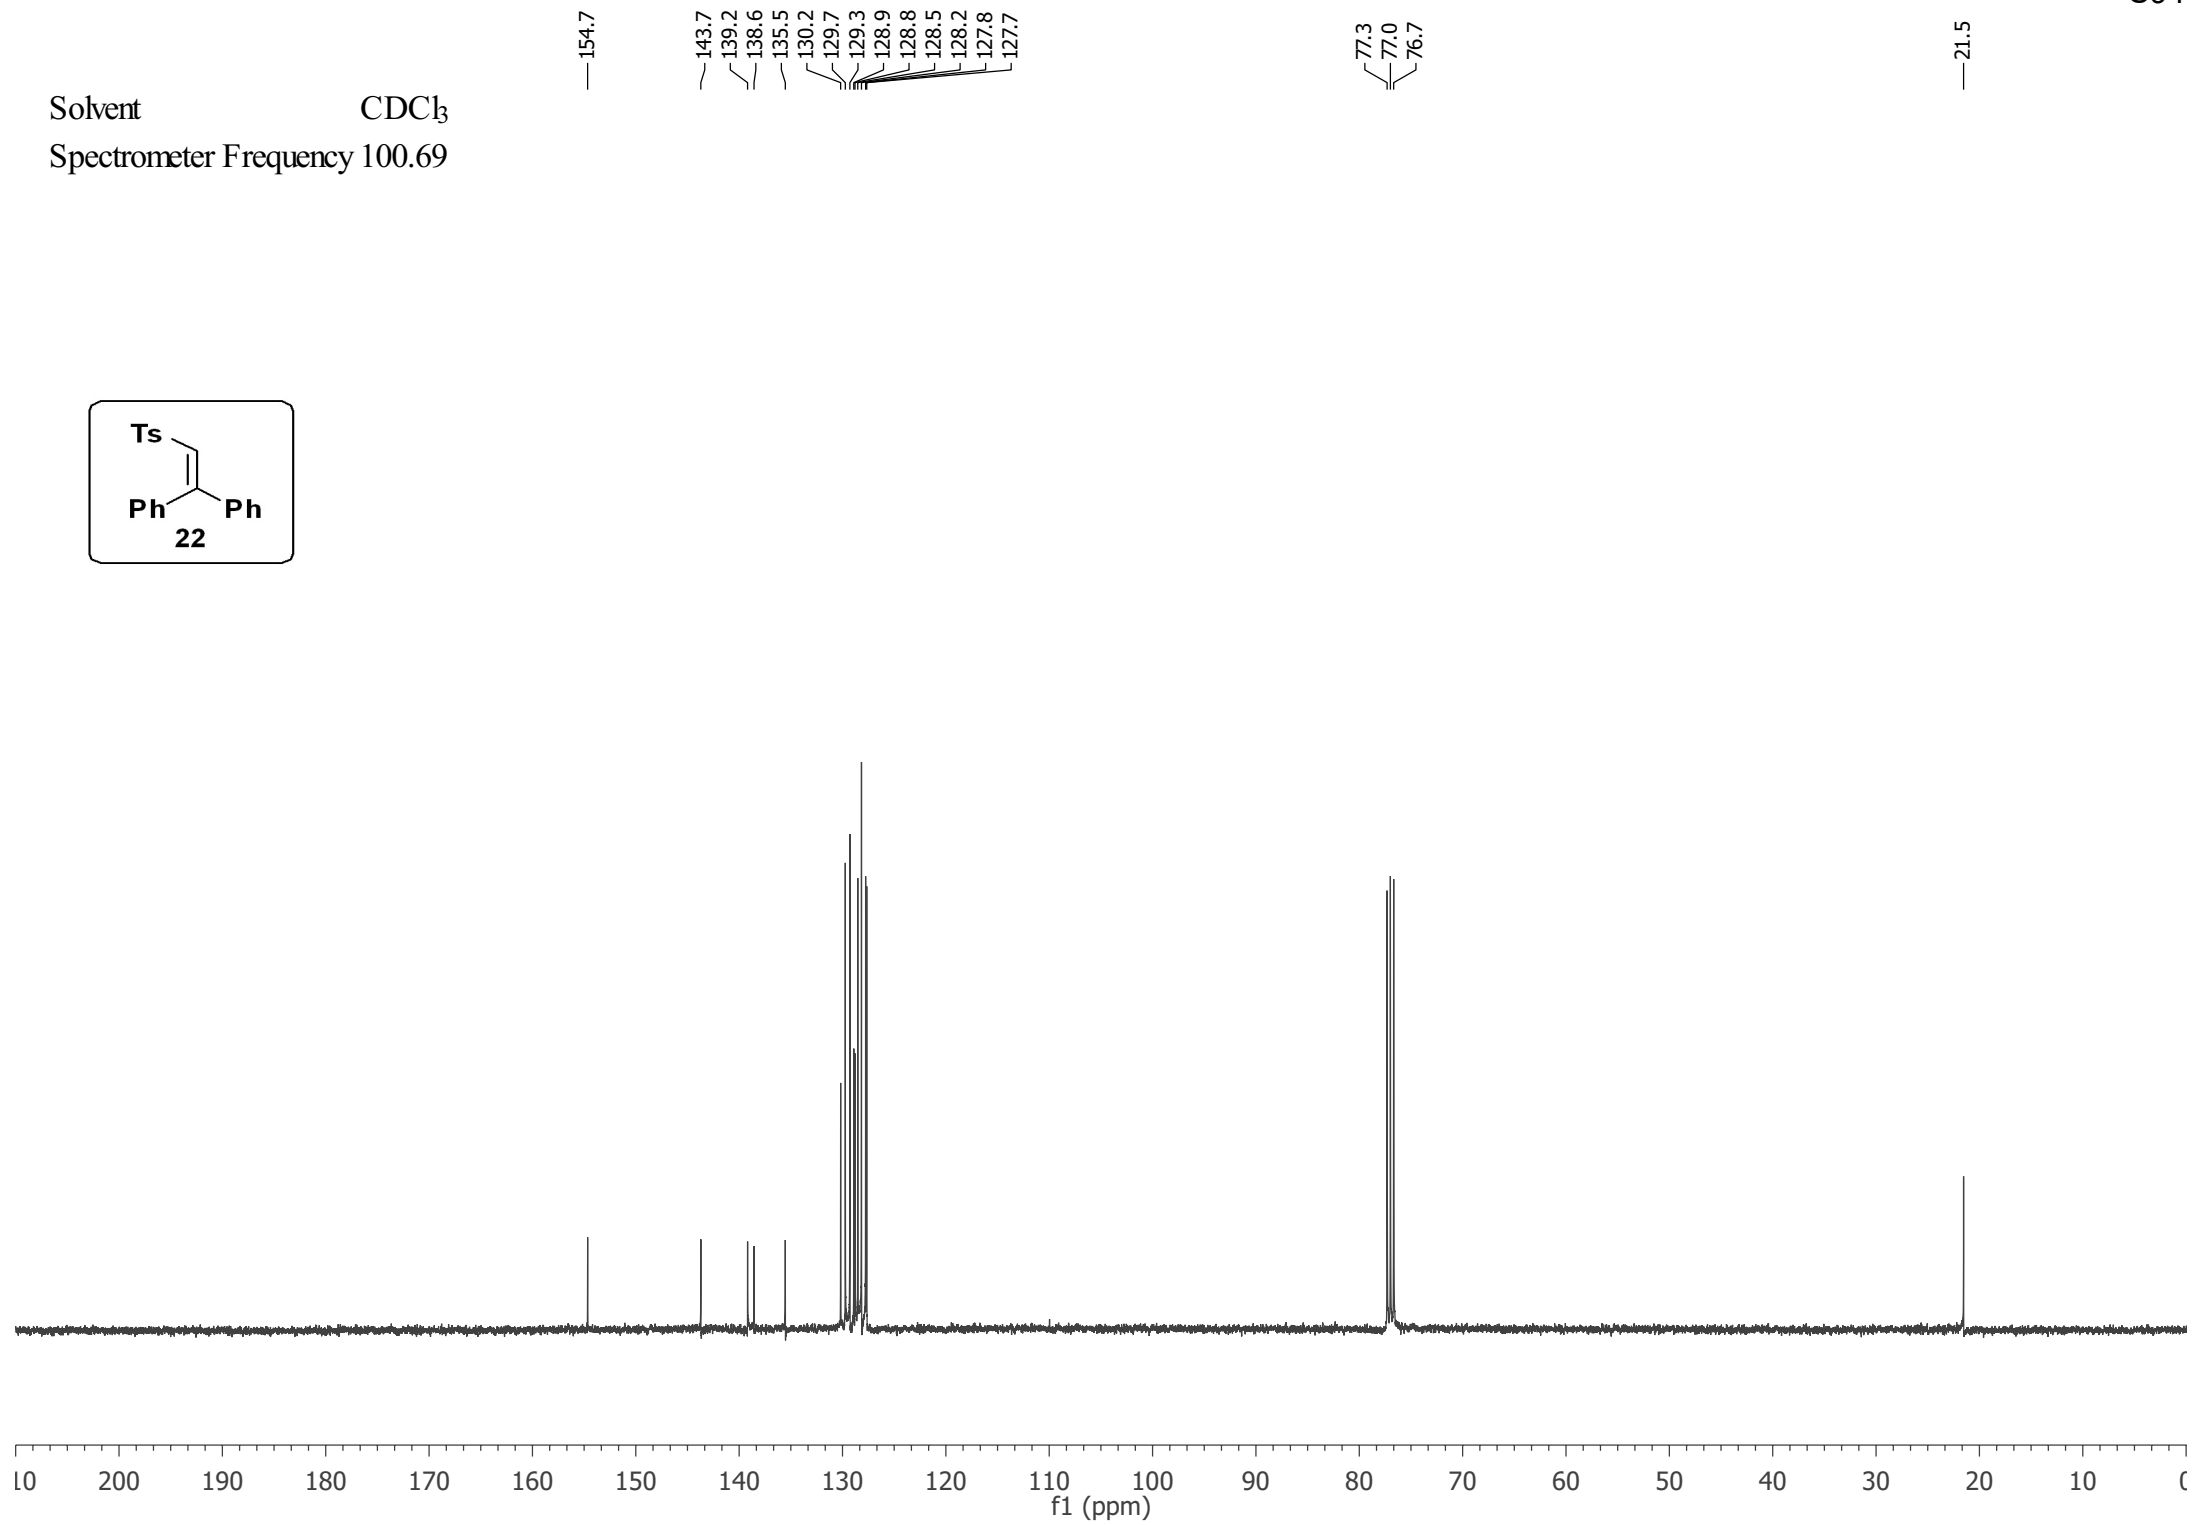

## checkCIF/PLATON report

Structure factors have been supplied for datablock(s) k10910-jjw-bmr-11-c-1

THIS REPORT IS FOR GUIDANCE ONLY. IF USED AS PART OF A REVIEW PROCEDURE FOR PUBLICATION, IT SHOULD NOT REPLACE THE EXPERTISE OF AN EXPERIENCED CRYSTALLOGRAPHIC REFEREE.

No syntax errors found.      CIF dictionary      Interpreting this report

### Datablock: k10910-jjw-bmr-11-c-1

---

|                        |                                  |                       |                  |
|------------------------|----------------------------------|-----------------------|------------------|
| Bond precision:        | C-C = 0.0084 A                   | Wavelength=0.71073    |                  |
| Cell:                  | a=9.2544 (2)                     | b=9.7531 (2)          | c=30.4790 (9)    |
|                        | alpha=89.135 (2)                 | beta=88.150 (2)       | gamma=74.562 (2) |
| Temperature:           | 113 K                            |                       |                  |
|                        | Calculated                       | Reported              |                  |
| Volume                 | 2650.31 (11)                     | 2650.31 (11)          |                  |
| Space group            | P -1                             | P -1                  |                  |
| Hall group             | -P 1                             | -P 1                  |                  |
| Moiety formula         | C28 H24 I N O4 S2 [+<br>solvent] | 2 (C28 H24 I N O4 S2) |                  |
| Sum formula            | C28 H24 I N O4 S2 [+<br>solvent] | C56 H48 I2 N2 O8 S4   |                  |
| Mr                     | 629.50                           | 1259.00               |                  |
| Dx, g cm <sup>-3</sup> | 1.578                            | 1.578                 |                  |
| Z                      | 4                                | 2                     |                  |
| Mu (mm <sup>-1</sup> ) | 1.401                            | 1.401                 |                  |
| F000                   | 1264.0                           | 1264.0                |                  |
| F000'                  | 1263.57                          |                       |                  |
| h, k, lmax             | 11, 11, 36                       | 11, 11, 36            |                  |
| Nref                   | 9304                             | 9290                  |                  |
| Tmin, Tmax             | 0.663, 0.756                     | 0.307, 1.000          |                  |
| Tmin'                  | 0.565                            |                       |                  |

Correction method= # Reported T Limits: Tmin=0.307 Tmax=1.000

AbsCorr = MULTI-SCAN

Data completeness= 0.998

Theta (max)= 24.998

R(reflections)= 0.0533( 8370)

wR2(reflections)=  
0.1063( 9290)

S = 1.273

Npar= 653

The following ALERTS were generated. Each ALERT has the format

**test-name\_ALERT\_alert-type\_alert-level.**

Click on the hyperlinks for more details of the test.

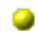

### Alert level C

|                   |                                                 |         |        |
|-------------------|-------------------------------------------------|---------|--------|
| PLAT342_ALERT_3_C | Low Bond Precision on C-C Bonds .....           | 0.00837 | Ang.   |
| PLAT906_ALERT_3_C | Large K Value in the Analysis of Variance ..... | 6.996   | Check  |
| PLAT911_ALERT_3_C | Missing FCF Refl Between Thmin & STh/L= 0.595   | 14      | Report |
| PLAT977_ALERT_2_C | Check Negative Difference Density on H11 .      | -0.39   | eA-3   |

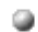

### Alert level G

|                   |                                                  |       |             |
|-------------------|--------------------------------------------------|-------|-------------|
| PLAT045_ALERT_1_G | Calculated and Reported Z Differ by a Factor ... | 2     | Check       |
| PLAT083_ALERT_2_G | SHELXL Second Parameter in WGHT Unusually Large  | 15.11 | Why ?       |
| PLAT154_ALERT_1_G | The s.u.'s on the Cell Angles are Equal ..(Note) | 0.002 | Degree      |
| PLAT431_ALERT_2_G | Short Inter HL..A Contact I1 ..02 .              | 2.97  | Ang.        |
|                   | 1-x,-y,2-z =                                     | 2_657 | Check       |
| PLAT605_ALERT_4_G | Largest Solvent Accessible VOID in the Structure | 21    | A**3        |
| PLAT883_ALERT_1_G | No Info/Value for _atom_sites_solution_primary . |       | Please Do ! |
| PLAT909_ALERT_3_G | Percentage of I>2sig(I) Data at Theta(Max) Still | 75%   | Note        |
| PLAT910_ALERT_3_G | Missing # of FCF Reflection(s) Below Theta(Min). | 2     | Note        |
| PLAT933_ALERT_2_G | Number of HKL-OMIT Records in Embedded .res File | 5     | Note        |
| PLAT967_ALERT_5_G | Note: Two-Theta Cutoff Value in Embedded .res .. | 50.0  | Degree      |
| PLAT978_ALERT_2_G | Number C-C Bonds with Positive Residual Density. | 1     | Info        |

- 0 **ALERT level A** = Most likely a serious problem - resolve or explain
- 0 **ALERT level B** = A potentially serious problem, consider carefully
- 4 **ALERT level C** = Check. Ensure it is not caused by an omission or oversight
- 11 **ALERT level G** = General information/check it is not something unexpected

- 3 ALERT type 1 CIF construction/syntax error, inconsistent or missing data
- 5 ALERT type 2 Indicator that the structure model may be wrong or deficient
- 5 ALERT type 3 Indicator that the structure quality may be low
- 1 ALERT type 4 Improvement, methodology, query or suggestion
- 1 ALERT type 5 Informative message, check



It is advisable to attempt to resolve as many as possible of the alerts in all categories. Often the minor alerts point to easily fixed oversights, errors and omissions in your CIF or refinement strategy, so attention to these fine details can be worthwhile. In order to resolve some of the more serious problems it may be necessary to carry out additional measurements or structure refinements. However, the purpose of your study may justify the reported deviations and the more serious of these should normally be commented upon in the discussion or experimental section of a paper or in the "special\_details" fields of the CIF. checkCIF was carefully designed to identify outliers and unusual parameters, but every test has its limitations and alerts that are not important in a particular case may appear. Conversely, the absence of alerts does not guarantee there are no aspects of the results needing attention. It is up to the individual to critically assess their own results and, if necessary, seek expert advice.

### **Publication of your CIF in IUCr journals**

A basic structural check has been run on your CIF. These basic checks will be run on all CIFs submitted for publication in IUCr journals (*Acta Crystallographica*, *Journal of Applied Crystallography*, *Journal of Synchrotron Radiation*); however, if you intend to submit to *Acta Crystallographica Section C* or *E* or *IUCrData*, you should make sure that full publication checks are run on the final version of your CIF prior to submission.

### **Publication of your CIF in other journals**

Please refer to the *Notes for Authors* of the relevant journal for any special instructions relating to CIF submission.

---

**PLATON version of 28/11/2022; check.def file version of 28/11/2022**

Datablock k10910-jjw-bmr-11-c-1 - ellipsoid plot

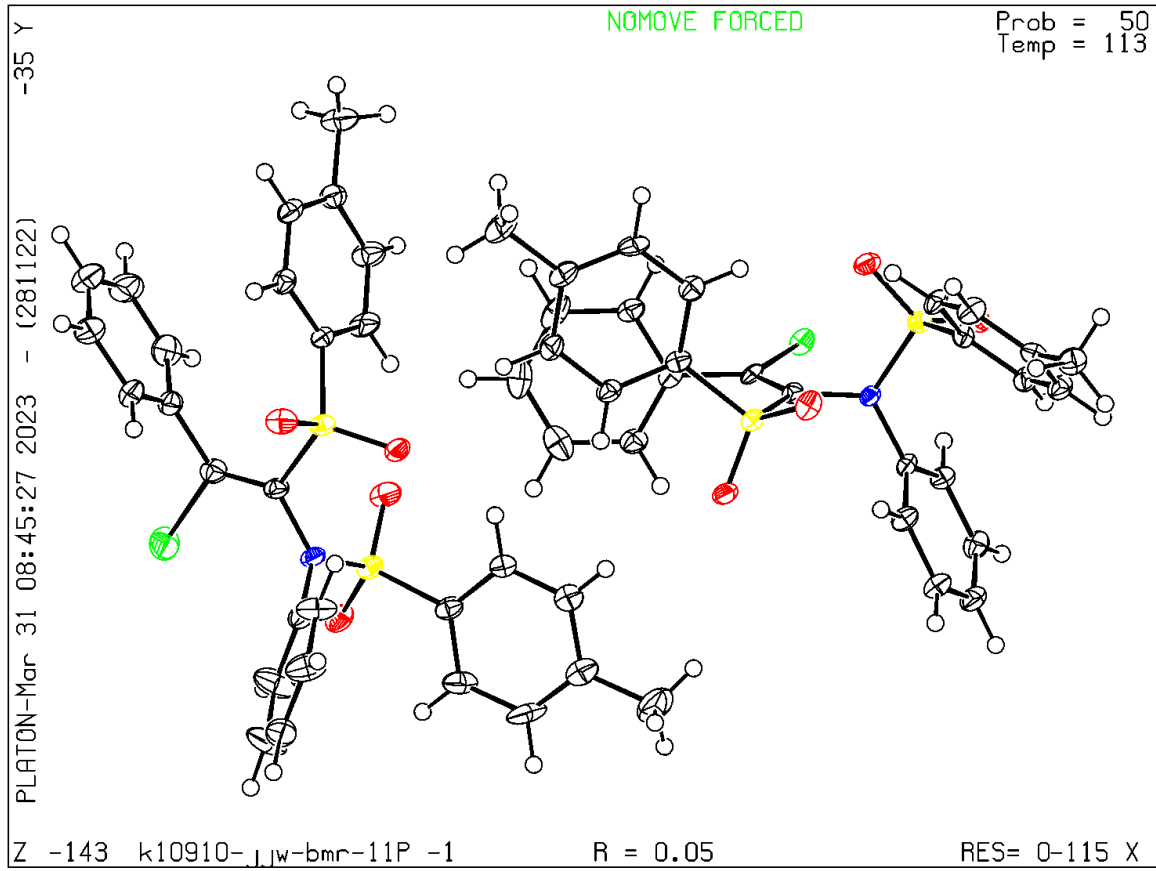

## checkCIF/PLATON report

Structure factors have been supplied for datablock(s) k11101-jjw-c

THIS REPORT IS FOR GUIDANCE ONLY. IF USED AS PART OF A REVIEW PROCEDURE FOR PUBLICATION, IT SHOULD NOT REPLACE THE EXPERTISE OF AN EXPERIENCED CRYSTALLOGRAPHIC REFEREE.

No syntax errors found.      CIF dictionary      Interpreting this report

### Datablock: k11101-jjw-c

---

|                        |                                  |                      |                  |
|------------------------|----------------------------------|----------------------|------------------|
| Bond precision:        | C-C = 0.0147 A                   | Wavelength=0.71073   |                  |
| Cell:                  | a=8.5557(4)                      | b=10.3154(5)         | c=29.9202(16)    |
|                        | alpha=93.058(4)                  | beta=96.826(4)       | gamma=104.064(4) |
| Temperature:           | 113 K                            |                      |                  |
|                        | Calculated                       | Reported             |                  |
| Volume                 | 2534.0(2)                        | 2534.0(2)            |                  |
| Space group            | P -1                             | P -1                 |                  |
| Hall group             | -P 1                             | -P 1                 |                  |
| Moiety formula         | C25 H26 I N O4 S2 [+<br>solvent] | 2(C25 H26 I N O4 S2) |                  |
| Sum formula            | C25 H26 I N O4 S2 [+<br>solvent] | C50 H52 I2 N2 O8 S4  |                  |
| Mr                     | 595.49                           | 1190.97              |                  |
| Dx, g cm <sup>-3</sup> | 1.561                            | 1.561                |                  |
| Z                      | 4                                | 2                    |                  |
| Mu (mm <sup>-1</sup> ) | 1.460                            | 1.460                |                  |
| F000                   | 1200.0                           | 1200.0               |                  |
| F000'                  | 1199.54                          |                      |                  |
| h, k, lmax             | 10, 12, 35                       | 10, 12, 35           |                  |
| Nref                   | 8921                             | 8908                 |                  |
| Tmin, Tmax             | 0.769, 0.803                     | 0.244, 1.000         |                  |
| Tmin'                  | 0.747                            |                      |                  |

Correction method= # Reported T Limits: Tmin=0.244 Tmax=1.000

AbsCorr = MULTI-SCAN

Data completeness= 0.999

Theta(max)= 25.000

R(reflections)= 0.0909( 5053)

wR2(reflections)=  
0.2357( 8908)

S = 1.028

Npar= 611

The following ALERTS were generated. Each ALERT has the format

**test-name\_ALERT\_alert-type\_alert-level.**

Click on the hyperlinks for more details of the test.

### ● Alert level C

RINTA01\_ALERT\_3\_C The value of Rint is greater than 0.12  
Rint given 0.150

|                   |                                                 |         |        |
|-------------------|-------------------------------------------------|---------|--------|
| PLAT020_ALERT_3_C | The Value of Rint is Greater Than 0.12 .....    | 0.150   | Report |
| PLAT342_ALERT_3_C | Low Bond Precision on C-C Bonds .....           | 0.01469 | Ang.   |
| PLAT906_ALERT_3_C | Large K Value in the Analysis of Variance ..... | 10.645  | Check  |
| PLAT906_ALERT_3_C | Large K Value in the Analysis of Variance ..... | 2.152   | Check  |
| PLAT911_ALERT_3_C | Missing FCF Refl Between Thmin & STh/L= 0.595   | 11      | Report |
| PLAT971_ALERT_2_C | Check Calcd Resid. Dens. 0.15Ang From I2        | 2.14    | eA-3   |
| PLAT971_ALERT_2_C | Check Calcd Resid. Dens. 0.28Ang From I1        | 2.12    | eA-3   |
| PLAT971_ALERT_2_C | Check Calcd Resid. Dens. 0.96Ang From C12       | 1.65    | eA-3   |
| PLAT971_ALERT_2_C | Check Calcd Resid. Dens. 0.99Ang From I1        | 1.57    | eA-3   |
| PLAT971_ALERT_2_C | Check Calcd Resid. Dens. 0.99Ang From I2        | 1.53    | eA-3   |
| PLAT975_ALERT_2_C | Check Calcd Resid. Dens. 0.98Ang From O1        | 0.77    | eA-3   |
| PLAT977_ALERT_2_C | Check Negative Difference Density on H16        | -0.33   | eA-3   |
| PLAT977_ALERT_2_C | Check Negative Difference Density on H41        | -0.31   | eA-3   |
| PLAT977_ALERT_2_C | Check Negative Difference Density on H49        | -0.36   | eA-3   |

### ● Alert level G

|                   |                                                  |        |             |
|-------------------|--------------------------------------------------|--------|-------------|
| PLAT003_ALERT_2_G | Number of Uiso or Uij Restrained non-H Atoms ... | 67     | Report      |
| PLAT045_ALERT_1_G | Calculated and Reported Z Differ by a Factor ... | 2      | Check       |
| PLAT072_ALERT_2_G | SHELXL First Parameter in WGHT Unusually Large   | 0.11   | Report      |
| PLAT154_ALERT_1_G | The s.u.'s on the Cell Angles are Equal ..(Note) | 0.004  | Degree      |
| PLAT178_ALERT_4_G | The CIF-Embedded .res File Contains SIMU Records | 1      | Report      |
| PLAT188_ALERT_3_G | A Non-default SIMU Restraint Value has been used | 0.0100 | Report      |
| PLAT301_ALERT_3_G | Main Residue Disorder .....(Resd 1 )             | 3%     | Note        |
| PLAT431_ALERT_2_G | Short Inter HL..A Contact I1 ..01                | 3.32   | Ang.        |
|                   | 1-x,1-y,-z =                                     | 2_665  | Check       |
| PLAT605_ALERT_4_G | Largest Solvent Accessible VOID in the Structure | 9      | A**3        |
| PLAT860_ALERT_3_G | Number of Least-Squares Restraints .....         | 1998   | Note        |
| PLAT883_ALERT_1_G | No Info/Value for _atom_sites_solution_primary   |        | Please Do ! |
| PLAT910_ALERT_3_G | Missing # of FCF Reflection(s) Below Theta(Min). | 2      | Note        |
| PLAT933_ALERT_2_G | Number of HKL-OMIT Records in Embedded .res File | 3      | Note        |
| PLAT967_ALERT_5_G | Note: Two-Theta Cutoff Value in Embedded .res .. | 50.0   | Degree      |
| PLAT978_ALERT_2_G | Number C-C Bonds with Positive Residual Density. | 0      | Info        |

0 **ALERT level A** = Most likely a serious problem - resolve or explain

0 **ALERT level B** = A potentially serious problem, consider carefully

15 **ALERT level C** = Check. Ensure it is not caused by an omission or oversight

15 **ALERT level G** = General information/check it is not something unexpected

3 **ALERT type 1** CIF construction/syntax error, inconsistent or missing data

14 ALERT type 2 Indicator that the structure model may be wrong or deficient  
10 ALERT type 3 Indicator that the structure quality may be low  
2 ALERT type 4 Improvement, methodology, query or suggestion  
1 ALERT type 5 Informative message, check

---

---

It is advisable to attempt to resolve as many as possible of the alerts in all categories. Often the minor alerts point to easily fixed oversights, errors and omissions in your CIF or refinement strategy, so attention to these fine details can be worthwhile. In order to resolve some of the more serious problems it may be necessary to carry out additional measurements or structure refinements. However, the purpose of your study may justify the reported deviations and the more serious of these should normally be commented upon in the discussion or experimental section of a paper or in the "special\_details" fields of the CIF. checkCIF was carefully designed to identify outliers and unusual parameters, but every test has its limitations and alerts that are not important in a particular case may appear. Conversely, the absence of alerts does not guarantee there are no aspects of the results needing attention. It is up to the individual to critically assess their own results and, if necessary, seek expert advice.

#### **Publication of your CIF in IUCr journals**

A basic structural check has been run on your CIF. These basic checks will be run on all CIFs submitted for publication in IUCr journals (*Acta Crystallographica*, *Journal of Applied Crystallography*, *Journal of Synchrotron Radiation*); however, if you intend to submit to *Acta Crystallographica Section C* or *E* or *IUCrData*, you should make sure that full publication checks are run on the final version of your CIF prior to submission.

#### **Publication of your CIF in other journals**

Please refer to the *Notes for Authors* of the relevant journal for any special instructions relating to CIF submission.

---

**PLATON version of 28/11/2022; check.def file version of 28/11/2022**

Datablock k11101-jjw-c - ellipsoid plot

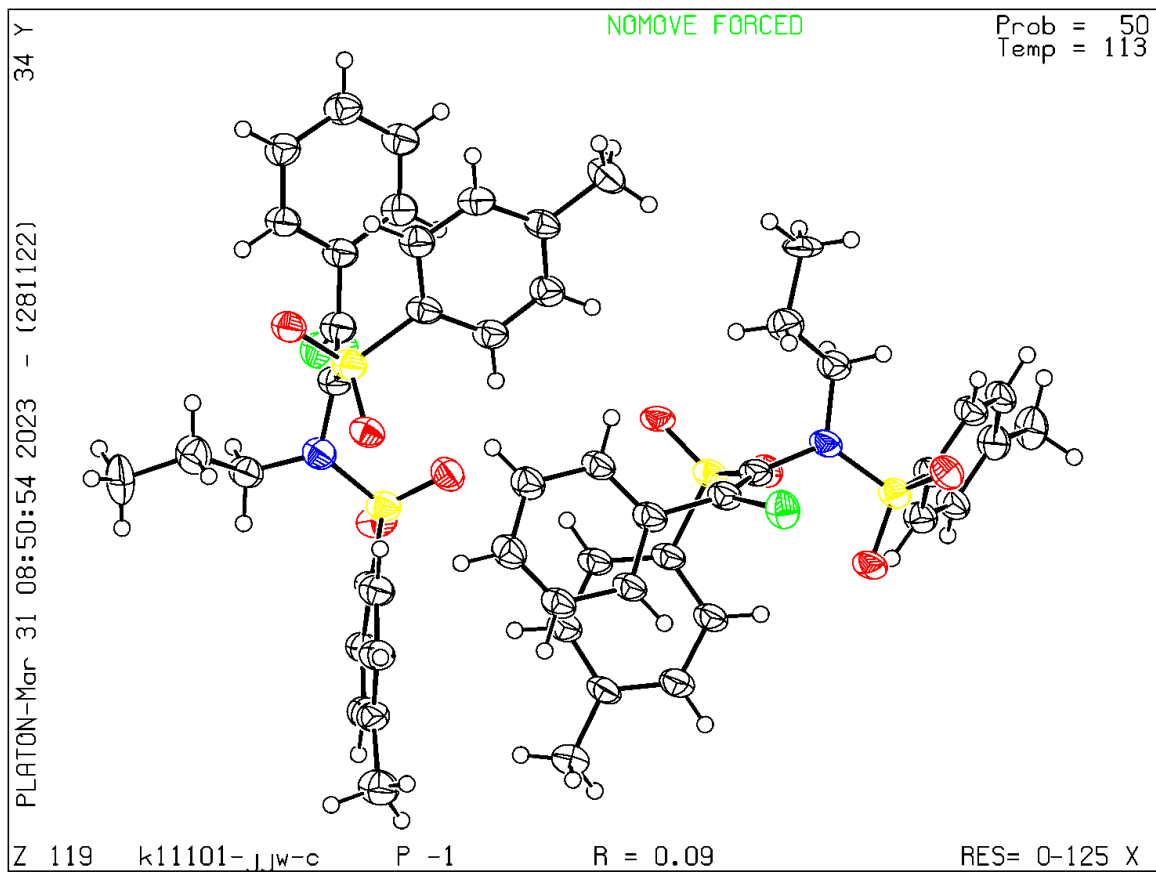

## checkCIF/PLATON report

Structure factors have been supplied for datablock(s) k11007-jjw-c

THIS REPORT IS FOR GUIDANCE ONLY. IF USED AS PART OF A REVIEW PROCEDURE FOR PUBLICATION, IT SHOULD NOT REPLACE THE EXPERTISE OF AN EXPERIENCED CRYSTALLOGRAPHIC REFEREE.

No syntax errors found.      CIF dictionary      Interpreting this report

### Datablock: k11007-jjw-c

---

|                        |                             |                                      |
|------------------------|-----------------------------|--------------------------------------|
| Bond precision:        | C-C = 0.0049 A              | Wavelength=0.71073                   |
| Cell:                  | a=6.7880(2)                 | b=12.1573(2)      c=13.6372(3)       |
|                        | alpha=96.973(2)             | beta=96.425(2)      gamma=102.531(2) |
| Temperature:           | 113 K                       |                                      |
|                        | Calculated                  | Reported                             |
| Volume                 | 1079.30(5)                  | 1079.30(4)                           |
| Space group            | P -1                        | P -1                                 |
| Hall group             | -P 1                        | -P 1                                 |
| Moiety formula         | C22 H19 I O4 S2 [+ solvent] | C22 H19 I O4 S2                      |
| Sum formula            | C22 H19 I O4 S2 [+ solvent] | C22 H19 I O4 S2                      |
| Mr                     | 538.39                      | 538.39                               |
| Dx, g cm <sup>-3</sup> | 1.657                       | 1.657                                |
| Z                      | 2                           | 2                                    |
| Mu (mm <sup>-1</sup> ) | 1.703                       | 1.703                                |
| F000                   | 536.0                       | 536.0                                |
| F000'                  | 535.76                      |                                      |
| h, k, lmax             | 8, 14, 16                   | 8, 14, 16                            |
| Nref                   | 3796                        | 3786                                 |
| Tmin, Tmax             | 0.671, 0.711                | 0.590, 1.000                         |
| Tmin'                  | 0.501                       |                                      |

Correction method= # Reported T Limits: Tmin=0.590 Tmax=1.000  
AbsCorr = MULTI-SCAN

Data completeness= 0.997      Theta(max)= 24.996

|                               |                                 |
|-------------------------------|---------------------------------|
| R(reflections)= 0.0310( 3475) | wR2(reflections)= 0.0810( 3786) |
| S = 1.060                     | Npar= 264                       |

---

The following ALERTS were generated. Each ALERT has the format  
**test-name\_ALERT\_alert-type\_alert-level.**

Click on the hyperlinks for more details of the test.

---

**Alert level C**

PLAT911\_ALERT\_3\_C Missing FCF Refl Between Thmin & Sth/L= 0.595 9 Report

---

**Alert level G**

PLAT154\_ALERT\_1\_G The s.u.'s on the Cell Angles are Equal ..(Note) 0.002 Degree  
 PLAT431\_ALERT\_2\_G Short Inter HL..A Contact I1 ..01 3.08 Ang.  
                                           2-x,2-y,1-z = 2\_776 Check  
 PLAT605\_ALERT\_4\_G Largest Solvent Accessible VOID in the Structure 0 A\*\*3  
 PLAT883\_ALERT\_1\_G No Info/Value for \_atom\_sites\_solution\_primary . Please Do !  
 PLAT909\_ALERT\_3\_G Percentage of I>2sig(I) Data at Theta(Max) Still 84% Note  
 PLAT910\_ALERT\_3\_G Missing # of FCF Reflection(s) Below Theta(Min). 2 Note  
 PLAT933\_ALERT\_2\_G Number of HKL-OMIT Records in Embedded .res File 3 Note  
 PLAT967\_ALERT\_5\_G Note: Two-Theta Cutoff Value in Embedded .res .. 50.0 Degree  
 PLAT978\_ALERT\_2\_G Number C-C Bonds with Positive Residual Density. 0 Info

---

- 0 **ALERT level A** = Most likely a serious problem - resolve or explain  
 0 **ALERT level B** = A potentially serious problem, consider carefully  
 1 **ALERT level C** = Check. Ensure it is not caused by an omission or oversight  
 9 **ALERT level G** = General information/check it is not something unexpected

- 2 ALERT type 1 CIF construction/syntax error, inconsistent or missing data  
 3 ALERT type 2 Indicator that the structure model may be wrong or deficient  
 3 ALERT type 3 Indicator that the structure quality may be low  
 1 ALERT type 4 Improvement, methodology, query or suggestion  
 1 ALERT type 5 Informative message, check
-



It is advisable to attempt to resolve as many as possible of the alerts in all categories. Often the minor alerts point to easily fixed oversights, errors and omissions in your CIF or refinement strategy, so attention to these fine details can be worthwhile. In order to resolve some of the more serious problems it may be necessary to carry out additional measurements or structure refinements. However, the purpose of your study may justify the reported deviations and the more serious of these should normally be commented upon in the discussion or experimental section of a paper or in the "special\_details" fields of the CIF. checkCIF was carefully designed to identify outliers and unusual parameters, but every test has its limitations and alerts that are not important in a particular case may appear. Conversely, the absence of alerts does not guarantee there are no aspects of the results needing attention. It is up to the individual to critically assess their own results and, if necessary, seek expert advice.

### **Publication of your CIF in IUCr journals**

A basic structural check has been run on your CIF. These basic checks will be run on all CIFs submitted for publication in IUCr journals (*Acta Crystallographica*, *Journal of Applied Crystallography*, *Journal of Synchrotron Radiation*); however, if you intend to submit to *Acta Crystallographica Section C* or *E* or *IUCrData*, you should make sure that full publication checks are run on the final version of your CIF prior to submission.

### **Publication of your CIF in other journals**

Please refer to the *Notes for Authors* of the relevant journal for any special instructions relating to CIF submission.

---

**PLATON version of 28/11/2022; check.def file version of 28/11/2022**

Datablock k11007-jjw-c - ellipsoid plot

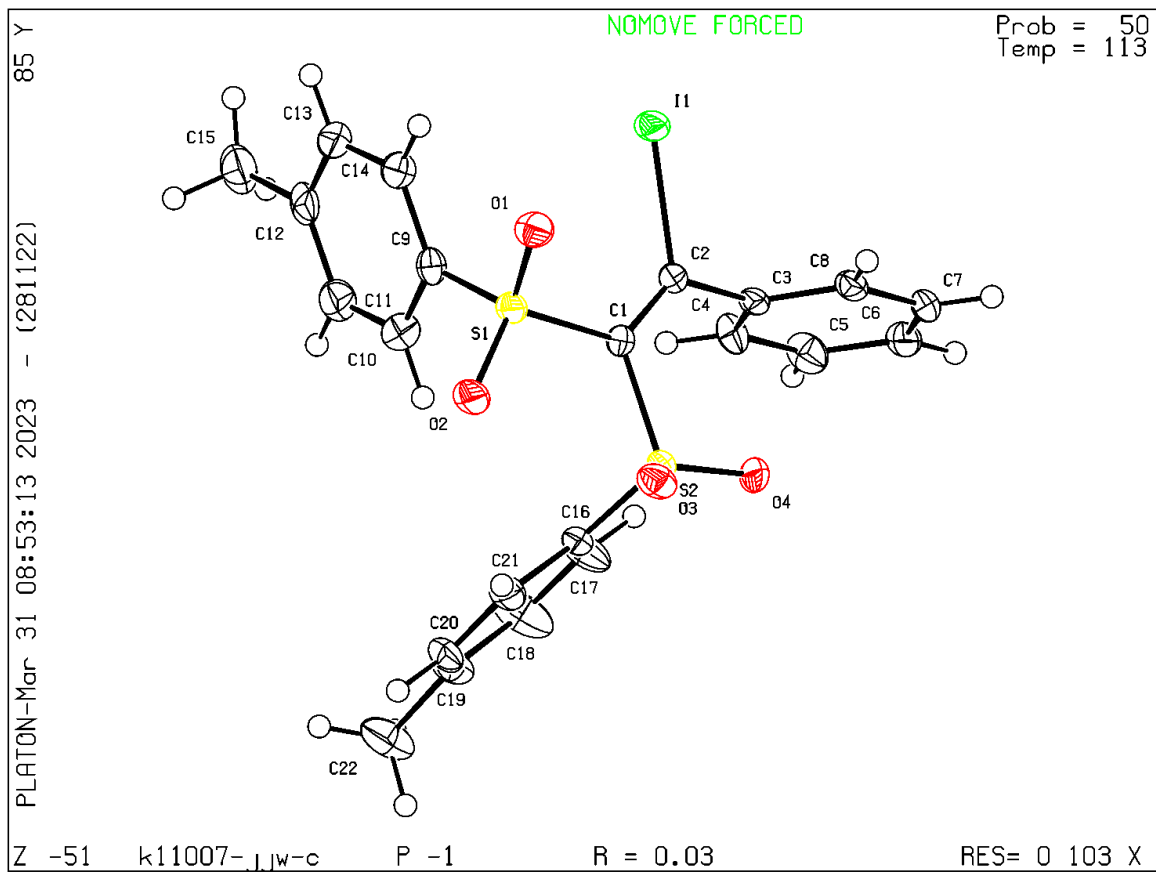

**checkCIF/PLATON report**

Structure factors have been supplied for datablock(s) k11104-jjw-alj3-7

THIS REPORT IS FOR GUIDANCE ONLY. IF USED AS PART OF A REVIEW PROCEDURE FOR PUBLICATION, IT SHOULD NOT REPLACE THE EXPERTISE OF AN EXPERIENCED CRYSTALLOGRAPHIC REFEREE.

No syntax errors found.      CIF dictionary      Interpreting this report

**Datablock: k11104-jjw-alj3-7**

|                        |                  |                                       |
|------------------------|------------------|---------------------------------------|
| Bond precision:        | C-C = 0.0031 A   | Wavelength=0.71073                    |
| Cell:                  | a=7.9819 (1)     | b=9.8435 (1)      c=13.6204 (2)       |
|                        | alpha=82.881 (1) | beta=74.573 (1)      gamma=74.145 (1) |
| Temperature:           | 113 K            |                                       |
|                        | Calculated       | Reported                              |
| Volume                 | 990.83 (2)       | 990.83 (2)                            |
| Space group            | P -1             | P -1                                  |
| Hall group             | -P 1             | -P 1                                  |
| Moiety formula         | C22 H17 I O4 S   | C22 H17 I O4 S                        |
| Sum formula            | C22 H17 I O4 S   | C22 H17 I O4 S                        |
| Mr                     | 504.32           | 504.31                                |
| Dx, g cm <sup>-3</sup> | 1.690            | 1.690                                 |
| Z                      | 2                | 2                                     |
| Mu (mm <sup>-1</sup> ) | 1.747            | 1.747                                 |
| F000                   | 500.0            | 500.0                                 |
| F000'                  | 499.51           |                                       |
| h, k, lmax             | 9, 11, 16        | 9, 11, 16                             |
| Nref                   | 3494             | 3490                                  |
| Tmin, Tmax             | 0.664, 0.705     | 0.468, 1.000                          |
| Tmin'                  | 0.640            |                                       |

Correction method= # Reported T Limits: Tmin=0.468 Tmax=1.000  
AbsCorr = MULTI-SCAN

Data completeness= 0.999      Theta (max)= 25.000

|                                |                                  |
|--------------------------------|----------------------------------|
| R(reflections)= 0.0196 ( 3334) | wR2(reflections)= 0.0468 ( 3490) |
| S = 1.078                      | Npar= 254                        |

---

The following ALERTS were generated. Each ALERT has the format

**test-name\_ALERT\_alert-type\_alert-level.**

Click on the hyperlinks for more details of the test.

---

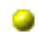

### Alert level C

PLAT911\_ALERT\_3\_C Missing FCF Refl Between Thmin & STh/L= 0.595 3 Report

---

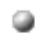

### Alert level G

PLAT003\_ALERT\_2\_G Number of Uiso or Uij Restrained non-H Atoms ... 6 Report  
 PLAT154\_ALERT\_1\_G The s.u.'s on the Cell Angles are Equal ..(Note) 0.001 Degree  
 PLAT178\_ALERT\_4\_G The CIF-Embedded .res File Contains SIMU Records 1 Report  
 PLAT188\_ALERT\_3\_G A Non-default SIMU Restraint Value has been used 0.0100 Report  
 PLAT860\_ALERT\_3\_G Number of Least-Squares Restraints ..... 60 Note  
 PLAT909\_ALERT\_3\_G Percentage of I>2sig(I) Data at Theta(Max) Still 90% Note  
 PLAT910\_ALERT\_3\_G Missing # of FCF Reflection(s) Below Theta(Min). 1 Note  
 PLAT933\_ALERT\_2\_G Number of HKL-OMIT Records in Embedded .res File 1 Note  
 PLAT967\_ALERT\_5\_G Note: Two-Theta Cutoff Value in Embedded .res .. 50.0 Degree  
 PLAT978\_ALERT\_2\_G Number C-C Bonds with Positive Residual Density. 12 Info

---

0 **ALERT level A** = Most likely a serious problem - resolve or explain  
 0 **ALERT level B** = A potentially serious problem, consider carefully  
 1 **ALERT level C** = Check. Ensure it is not caused by an omission or oversight  
 10 **ALERT level G** = General information/check it is not something unexpected

1 ALERT type 1 CIF construction/syntax error, inconsistent or missing data  
 3 ALERT type 2 Indicator that the structure model may be wrong or deficient  
 5 ALERT type 3 Indicator that the structure quality may be low  
 1 ALERT type 4 Improvement, methodology, query or suggestion  
 1 ALERT type 5 Informative message, check

---

It is advisable to attempt to resolve as many as possible of the alerts in all categories. Often the minor alerts point to easily fixed oversights, errors and omissions in your CIF or refinement strategy, so attention to these fine details can be worthwhile. In order to resolve some of the more serious problems it may be necessary to carry out additional measurements or structure refinements. However, the purpose of your study may justify the reported deviations and the more serious of these should normally be commented upon in the discussion or experimental section of a paper or in the "special\_details" fields of the CIF. checkCIF was carefully designed to identify outliers and unusual parameters, but every test has its limitations and alerts that are not important in a particular case may appear. Conversely, the absence of alerts does not guarantee there are no aspects of the results needing attention. It is up to the individual to critically assess their own results and, if necessary, seek expert advice.

### **Publication of your CIF in IUCr journals**

A basic structural check has been run on your CIF. These basic checks will be run on all CIFs submitted for publication in IUCr journals (*Acta Crystallographica*, *Journal of Applied Crystallography*, *Journal of Synchrotron Radiation*); however, if you intend to submit to *Acta Crystallographica Section C* or *E* or *IUCrData*, you should make sure that full publication checks are run on the final version of your CIF prior to submission.

### **Publication of your CIF in other journals**

Please refer to the *Notes for Authors* of the relevant journal for any special instructions relating to CIF submission.

---

**PLATON version of 28/11/2022; check.def file version of 28/11/2022**

Datablock k11104-jjw-alj3-7 - ellipsoid plot

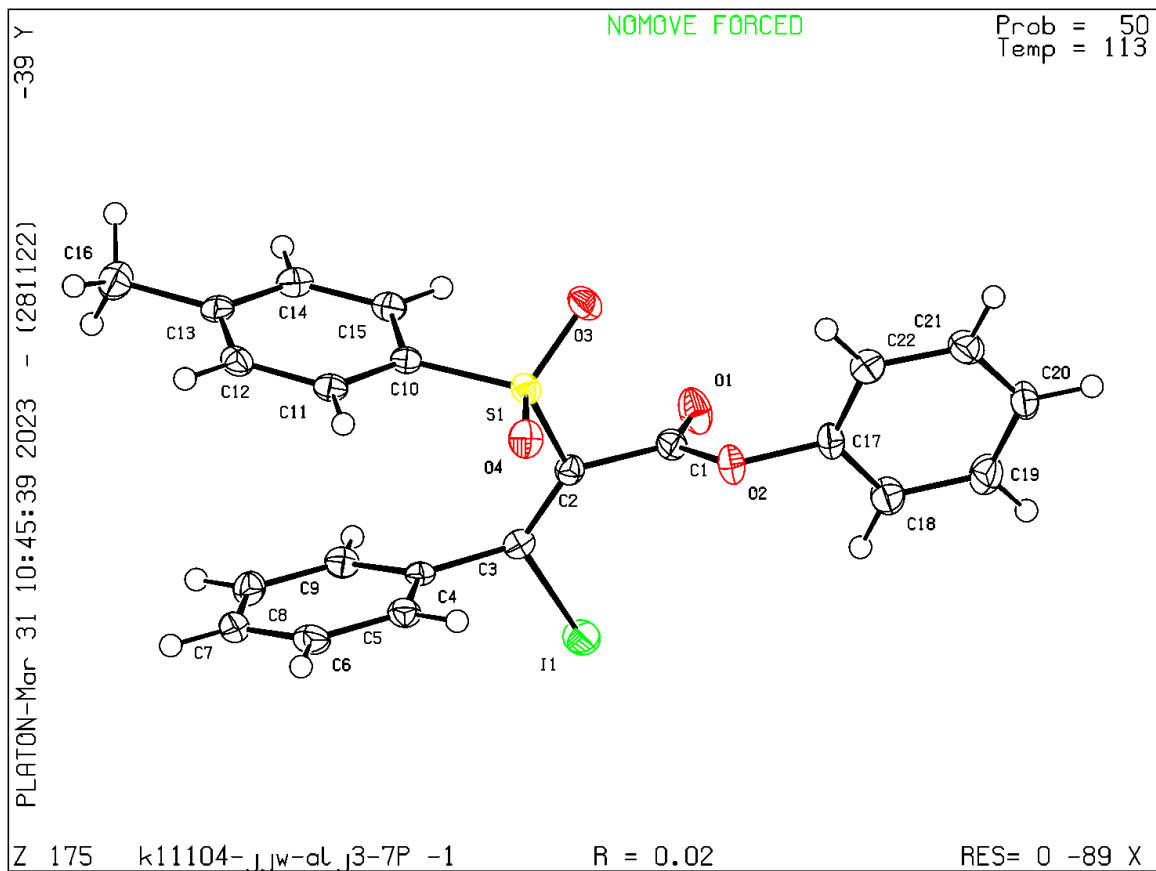

Supplement: d3cc00842h1.pdf [file d3cc00842h1.pdf]
